# Supplementary material for: Periplasm homeostatic regulation maintains spatial constraints essential for cell envelope processes and cell viability
Source: bioRxiv preprint, doi:10.1101/2021.01.13.426498, version 2 (2021-08-31)
Supplement: Supplemental Table S1 [file 426498_file03.xlsx]

## Sheet: Lpp+21 Vs WT
Gene Name	Protein IDs	Lpp.21.Sorbitol_vs_WT.Sorbitol_log2 fold change	Lpp.21.Sorbitol_vs_WT.Sorbitol_p.val	Lpp.21.Sorbitol_vs_WT.M9_p.adj	Lpp.21.Sorbitol_vs_WT.Sorbitol_significant	imputed	num_NAs	Protein.names
gatA	P69828	-7.6	3.2e-08	1.28e-06	TRUE	TRUE	6	Galactitol-specific phosphotransferase enzyme IIA component
gatB	P37188	-7.47	9.22e-10	1.05e-07	TRUE	TRUE	6	Galactitol-specific phosphotransferase enzyme IIB component
glpQ	P09394	-7.19	0.00198	0.00759	TRUE	TRUE	5	Glycerophosphoryl diester phosphodiesterase
gatC	P69831	-6.95	1.1e-07	2.34e-06	TRUE	TRUE	6	Galactitol permease IIC component
ygdI	P65292	-4.63	9.48e-05	0.354	TRUE	TRUE	9	Uncharacterized lipoprotein YgdI
gatD	P0A9S3	-4.6	5.75e-07	2.48e-06	TRUE	TRUE	6	Galactitol-1-phosphate 5-dehydrogenase
rseP	P0AEH1	-4.06	5.98e-06	0.0217	TRUE	TRUE	6	Regulator of sigma-E protease RseP
dcuA	P0ABN5	-3.82	0.000132	0.000241	TRUE	TRUE	3	Anaerobic C4-dicarboxylate transporter DcuA
bamE	P0A937	-3.52	3.97e-08	3.55e-06	TRUE	TRUE	3	Outer membrane protein assembly factor BamE
yfdI	P76507	-3.5	0.000485	0.0206	TRUE	TRUE	7	Uncharacterized protein YfdI
yhdP	P46474	-3.43	5.71e-06	0.00509	TRUE	TRUE	9	Uncharacterized protein YhdP
srlE	P56580	-3.34	4.28e-05	0.623	TRUE	TRUE	9	Glucitol/sorbitol-specific phosphotransferase enzyme IIB component
lpxB	P10441	-2.97	0.00345	0.052	TRUE	TRUE	5	Lipid-A-disaccharide synthase
aroP	P15993	-2.57	0.00555	0.186	TRUE	FALSE	0	Aromatic amino acid transport protein AroP
sbcD	P0AG76	-2.44	0.000166	0.0522	TRUE	TRUE	9	Nuclease SbcCD subunit D
dinI	P0ABR1	-2.35	0.0021	0.169	TRUE	TRUE	9	DNA-damage-inducible protein I
yigA	P23305	-2.32	0.00711	0.668	TRUE	TRUE	8	Uncharacterized protein YigA
ybiX	P75779	-2.29	0.00293	0.0416	TRUE	TRUE	5	PKHD-type hydroxylase YbiX
cpdA	P0AEW4	-2.21	0.00123	0.193	TRUE	TRUE	10	3,5-cyclic adenosine monophosphate phosphodiesterase CpdA
pabB	P05041	-2.1	5.54e-05	0.0585	TRUE	TRUE	9	Aminodeoxychorismate synthase component 1
yfaZ	P76471	-2.09	0.00331	0.195	TRUE	TRUE	9	Uncharacterized protein YfaZ
lsrB	P76142	-2.03	2.69e-07	1.53e-05	TRUE	TRUE	6	Autoinducer 2-binding protein LsrB
nikR	P0A6Z6	-2	0.00208	0.0213	TRUE	TRUE	4	Nickel-responsive regulator
nuoK	P0AFE4	-1.96	0.0024	0.617	TRUE	TRUE	9	NADH-quinone oxidoreductase subunit K
ubiA	P0AGK1	-1.84	4.61e-05	0.000385	TRUE	TRUE	3	4-hydroxybenzoate octaprenyltransferase
yjiN	P39385	-1.84	0.000143	0.00481	TRUE	TRUE	9	Uncharacterized protein YjiN
mglB	P0AEE5	-1.77	3.15e-07	1.91e-06	TRUE	FALSE	0	D-galactose-binding periplasmic protein
osmY	P0AFH8	-1.75	2.9e-05	0.203	TRUE	FALSE	0	Osmotically-inducible protein Y
ydcS	P76108	-1.73	9.63e-07	3.45e-06	TRUE	FALSE	0	Putative ABC transporter periplasmic-binding protein YdcS
ubiJ	P0ADP7	-1.69	0.00028	0.0063	TRUE	TRUE	7	Ubiquinone biosynthesis protein UbiJ
yahO	P75694	-1.69	4.88e-06	3.54e-05	TRUE	FALSE	0	Uncharacterized protein YahO
ydeN	P77318	-1.69	0.00732	0.031	TRUE	TRUE	2	Uncharacterized sulfatase YdeN
srlD	P05707	-1.64	0.00119	2.03e-05	TRUE	TRUE	6	Sorbitol-6-phosphate 2-dehydrogenase
holE	P0ABS8	-1.59	0.000693	0.963	TRUE	TRUE	9	DNA polymerase III subunit theta
ydaM	P77302	1.61	2.15e-05	7.91e-05	TRUE	TRUE	1	Probable diguanylate cyclase YdaM
frdC	P0A8Q0	1.62	0.000739	0.509	TRUE	FALSE	0	Fumarate reductase subunit C
oppB	P0AFH2	1.62	0.00157	0.991	TRUE	FALSE	0	Oligopeptide transport system permease protein OppB
frdA	P00363	1.69	0.000771	0.607	TRUE	FALSE	0	Fumarate reductase flavoprotein subunit
cspA	P0A9X9	1.7	0.0038	0.0378	TRUE	FALSE	0	Cold shock protein CspA
asnA	P00963	1.71	7.45e-05	0.24	TRUE	FALSE	0	Aspartate--ammonia ligase
frdB	P0AC47	1.76	0.00151	0.861	TRUE	FALSE	0	Fumarate reductase iron-sulfur subunit
cspI	P0A986	1.8	0.000173	0.556	TRUE	TRUE	2	Cold shock-like protein CspI
oppC	P0AFH6	1.91	0.000636	0.815	TRUE	FALSE	0	Oligopeptide transport system permease protein OppC
oppF	P77737	1.92	0.00133	0.906	TRUE	FALSE	0	Oligopeptide transport ATP-binding protein OppF
glnK	P0AC55	1.99	0.000785	0.971	TRUE	FALSE	0	Nitrogen regulatory protein P-II 2
rbn	P0A8V0	1.99	1.31e-05	0.603	TRUE	TRUE	4	Ribonuclease BN
oppD	P76027	2.09	0.000621	0.84	TRUE	FALSE	0	Oligopeptide transport ATP-binding protein OppD
fhuE	P16869	2.14	0.000773	0.994	TRUE	TRUE	3	FhuE receptor
phoB	P0AFJ5	2.14	0.00326	0.757	TRUE	TRUE	3	Phosphate regulon transcriptional regulatory protein PhoB
feoB	P33650	2.26	0.00158	0.556	TRUE	FALSE	0	Ferrous iron transport protein B
gldA	P0A9S5	2.28	0.000859	0.783	TRUE	FALSE	0	Glycerol dehydrogenase
tatA	P69428	2.28	2.79e-07	0.64	TRUE	TRUE	6	Sec-independent protein translocase protein TatA
yaiI	P0A8D3	2.28	0.00563	0.809	TRUE	TRUE	2	UPF0178 protein YaiI
ynfG	P0AAJ1	2.4	0.00257	0.844	TRUE	TRUE	4	Probable anaerobic dimethyl sulfoxide reductase chain YnfG
ydfK	P76154	2.42	0.000547	0.481	TRUE	TRUE	6	Uncharacterized protein YdfK;Uncharacterized protein YnaE
elaA	P0AEH3	2.48	0.00202	0.299	TRUE	TRUE	2	Protein ElaA
yehT	P0AFT5	2.59	1.62e-05	0.000329	TRUE	TRUE	6	Transcriptional regulatory protein YehT
yhbT	P64599	2.74	0.0047	0.988	TRUE	TRUE	5	Uncharacterized protein YhbT
feoA	P0AEL3	3.06	0.00102	0.386	TRUE	TRUE	6	Ferrous iron transport protein A
ynfF	P77783	3.23	0.00203	0.993	TRUE	TRUE	4	Probable dimethyl sulfoxide reductase chain YnfF
hypB	P0AAN3	3.47	0.00366	0.937	TRUE	TRUE	2	Hydrogenase isoenzymes nickel incorporation protein HypB
nsrR	P0AF63	3.58	7.84e-05	0.172	TRUE	TRUE	4	HTH-type transcriptional repressor NsrR
yciI	P0AB55	3.64	8.28e-10	0.0502	TRUE	TRUE	3	Protein YciI
zraP	P0AAA9	3.67	0.001	0.021	TRUE	TRUE	7	Zinc resistance-associated protein
hiuH	P76341	3.72	0.00127	0.0272	TRUE	TRUE	4	5-hydroxyisourate hydrolase
bioD2	P0A6E9	3.84	0.00271	0.991	TRUE	TRUE	2	ATP-dependent dethiobiotin synthetase BioD 2
amiC	P63883	4.67	5.26e-06	0.00033	TRUE	TRUE	9	N-acetylmuramoyl-L-alanine amidase AmiC
dmsB	P18776	4.72	0.000162	0.915	TRUE	TRUE	4	Anaerobic dimethyl sulfoxide reductase chain B
cspG	P0A978	5.98	4.49e-06	6.62e-05	TRUE	TRUE	9	Cold shock-like protein CspG
garL	P23522	6.35	4.22e-08	0.21	TRUE	TRUE	3	5-keto-4-deoxy-D-glucarate aldolase
ygeR	Q46798	-2.66	0.063	0.606	FALSE	TRUE	9	Uncharacterized lipoprotein YgeR
sra	P68191	-2.49	0.0458	0.994	FALSE	TRUE	5	Stationary-phase-induced ribosome-associated protein
araF	P02924	-2.15	0.0413	0.874	FALSE	TRUE	8	L-arabinose-binding periplasmic protein
bcsB	P37652	-2.14	0.077	0.341	FALSE	TRUE	8	Cyclic di-GMP-binding protein
ygdR	P65294	-2.02	0.021	0.0435	FALSE	TRUE	5	Uncharacterized lipoprotein YgdR
yceA	P24188	-1.74	0.0214	0.835	FALSE	TRUE	7	UPF0176 protein YceA
ribF	P0AG40	-1.68	0.223	0.258	FALSE	TRUE	1	Riboflavin biosynthesis protein RibF;Riboflavin kinase;FMN adenylyltransferase
iscR	P0AGK8	-1.58	0.00271	0.313	FALSE	FALSE	0	HTH-type transcriptional regulator IscR
ybdR	P77316	-1.57	0.00193	0.807	FALSE	TRUE	5	Uncharacterized zinc-type alcohol dehydrogenase-like protein YbdR
ytfQ	P39325	-1.54	2.03e-05	0.000137	FALSE	FALSE	0	ABC transporter periplasmic-binding protein YtfQ
dnaG	P0ABS5	-1.49	0.0294	0.0942	FALSE	TRUE	3	DNA primase
ivy	P0AD59	-1.49	1.36e-06	0.00222	FALSE	FALSE	0	Inhibitor of vertebrate lysozyme
gsiC	P75798	-1.48	0.0416	0.2	FALSE	TRUE	2	Glutathione transport system permease protein GsiC
hdeB	P0AET2	-1.46	0.000142	0.000369	FALSE	FALSE	0	Acid stress chaperone HdeB
xerC	P0A8P6	-1.44	0.0874	0.826	FALSE	TRUE	8	Tyrosine recombinase XerC
rbsB	P02925	-1.43	2.8e-07	2.48e-06	FALSE	FALSE	0	D-ribose-binding periplasmic protein
ydeI	P31130	-1.43	1.4e-05	0.000485	FALSE	FALSE	0	Uncharacterized protein YdeI
yjbB	P0AF43	-1.41	0.017	0.232	FALSE	TRUE	9	Uncharacterized protein YjbB
lptA	P0ADV1	-1.41	0.00135	0.00455	FALSE	FALSE	0	Lipopolysaccharide export system protein LptA
mutM	P05523	-1.41	0.00685	0.0179	FALSE	TRUE	4	Formamidopyrimidine-DNA glycosylase
nirD	P0A9I8	-1.38	0.0625	0.026	FALSE	TRUE	7	Nitrite reductase (NADH) small subunit
tesA	P0ADA1	-1.38	0.0219	0.0717	FALSE	TRUE	1	Acyl-CoA thioesterase I
degS	P0AEE3	-1.37	0.0307	0.0576	FALSE	TRUE	1	Serine endoprotease DegS
srlB	P05706	-1.36	0.00298	9.23e-05	FALSE	TRUE	6	Glucitol/sorbitol-specific phosphotransferase enzyme IIA component
glpT	P08194	-1.35	0.0581	0.00789	FALSE	TRUE	7	Glycerol-3-phosphate transporter
ratB	P52119	-1.35	0.092	0.747	FALSE	TRUE	2	UPF0125 protein RatB
metR	P0A9F9	-1.34	0.0301	0.00485	FALSE	TRUE	4	HTH-type transcriptional regulator MetR
ypfH	P76561	-1.33	0.0287	0.0826	FALSE	TRUE	5	Esterase YpfH
puuR	P0A9U6	-1.33	0.397	1	FALSE	TRUE	3	HTH-type transcriptional regulator PuuR
malK	P68187	-1.32	0.00175	0.844	FALSE	TRUE	6	Maltose/maltodextrin import ATP-binding protein MalK
yifL	P0ADN6	-1.32	0.228	0.193	FALSE	TRUE	3	Uncharacterized lipoprotein YifL
pqqL	P31828	-1.28	0.207	0.935	FALSE	TRUE	10	Probable zinc protease PqqL
mutL	P23367	-1.27	0.0652	0.0452	FALSE	TRUE	2	DNA mismatch repair protein MutL
rbbA	P37624	-1.26	0.0533	0.0406	FALSE	TRUE	7	Ribosome-associated ATPase
csiD	P76621	-1.25	0.198	0.256	FALSE	TRUE	2	Protein CsiD
artQ	P0AE34	-1.22	0.106	0.844	FALSE	TRUE	10	Arginine ABC transporter permease protein ArtQ
dsbA	P0AEG4	-1.22	1.38e-07	9.39e-05	FALSE	FALSE	0	Thiol:disulfide interchange protein DsbA
alsB	P39265	-1.2	0.00313	0.00141	FALSE	TRUE	5	D-allose-binding periplasmic protein
iscA	P0AAC8	-1.2	0.0737	0.383	FALSE	FALSE	0	Iron-binding protein IscA
hisJ	P0AEU0	-1.18	2.92e-07	3.85e-05	FALSE	FALSE	0	Histidine-binding periplasmic protein
recD	P04993	-1.18	0.00245	0.64	FALSE	TRUE	6	RecBCD enzyme subunit RecD
cysW	P0AEB0	-1.17	0.0929	0.663	FALSE	TRUE	9	Sulfate transport system permease protein CysW
ycjY	P76049	-1.17	0.219	0.979	FALSE	TRUE	9	Uncharacterized protein YcjY
rfaJ	P27129	-1.16	0.000554	6.54e-06	FALSE	TRUE	6	Lipopolysaccharide 1,2-glucosyltransferase
treR	P36673	-1.16	0.0033	0.403	FALSE	TRUE	10	HTH-type transcriptional regulator TreR
thiB	P31550	-1.14	0.0408	0.00371	FALSE	TRUE	6	Thiamine-binding periplasmic protein
ugpC	P10907	-1.14	0.00965	0.042	FALSE	TRUE	9	sn-glycerol-3-phosphate import ATP-binding protein UgpC
glpD	P13035	-1.13	0.0287	2.88e-05	FALSE	TRUE	3	Aerobic glycerol-3-phosphate dehydrogenase
truA	P07649	-1.13	0.167	0.902	FALSE	TRUE	2	tRNA pseudouridine synthase A
yebF	P33219	-1.13	2.21e-06	0.114	FALSE	FALSE	0	Protein YebF
ybhB	P12994	-1.12	0.209	0.189	FALSE	TRUE	3	UPF0098 protein YbhB
hexR	P46118	-1.12	0.000991	0.00581	FALSE	FALSE	0	HTH-type transcriptional regulator HexR
ugpB	P0AG80	-1.11	0.000232	0.000444	FALSE	FALSE	0	sn-glycerol-3-phosphate-binding periplasmic protein UgpB
cysA	P16676	-1.1	7.42e-05	0.229	FALSE	FALSE	0	Sulfate/thiosulfate import ATP-binding protein CysA
rtn	P76446	-1.1	0.052	0.0851	FALSE	TRUE	1	Protein Rtn
fadE	Q47146	-1.09	0.000772	9.14e-05	FALSE	FALSE	0	Acyl-coenzyme A dehydrogenase
amiD	P75820	-1.08	0.0765	0.926	FALSE	TRUE	9	N-acetylmuramoyl-L-alanine amidase AmiD
malE	P0AEX9	-1.08	2.67e-06	1.28e-06	FALSE	FALSE	0	Maltose-binding periplasmic protein
appA	P07102	-1.08	0.00187	0.00245	FALSE	TRUE	3	Periplasmic AppA protein;Phosphoanhydride phosphohydrolase;4-phytase
uspC	P46888	-1.07	0.0407	0.00666	FALSE	TRUE	9	Universal stress protein C
yagI	P77300	-1.07	2.49e-06	9.56e-05	FALSE	FALSE	0	Uncharacterized HTH-type transcriptional regulator YagI
glcC	P0ACL5	-1.06	0.0978	0.752	FALSE	TRUE	8	Glc operon transcriptional activator
ybjL	P60869	-1.05	0.0839	0.233	FALSE	TRUE	1	Putative transport protein YbjL
atpE	P68699	-1.03	0.397	0.481	FALSE	TRUE	1	ATP synthase subunit c
hdeA	P0AES9	-1.02	0.00717	0.00083	FALSE	FALSE	0	Acid stress chaperone HdeA
fepB	P0AEL6	-1.02	0.0533	0.185	FALSE	TRUE	1	Ferrienterobactin-binding periplasmic protein
mrr	P24202	-1.02	0.0418	0.0364	FALSE	TRUE	1	Mrr restriction system protein
osmF	P33362	-1.02	5.5e-07	0.255	FALSE	FALSE	0	Putative osmoprotectant uptake system substrate-binding protein OsmF
sad	P76149	-1.02	0.138	0.145	FALSE	TRUE	1	Succinate semialdehyde dehydrogenase [NAD(P)+] Sad
dnaC	P0AEF0	-1.01	0.0187	0.00926	FALSE	TRUE	10	DNA replication protein DnaC
fimA	P04128	-1.01	0.209	0.0142	FALSE	TRUE	6	Type-1 fimbrial protein, A chain
cycA	P0AAE0	-0.987	0.225	0.0829	FALSE	TRUE	1	D-serine/D-alanine/glycine transporter
yebY	P64506	-0.966	2.68e-06	0.000229	FALSE	FALSE	0	Uncharacterized protein YebY
treC	P28904	-0.952	0.0334	0.00371	FALSE	TRUE	1	Trehalose-6-phosphate hydrolase
diaA	P66817	-0.952	0.388	0.868	FALSE	TRUE	6	DnaA initiator-associating protein DiaA
iaaA	P37595	-0.949	0.0332	0.0155	FALSE	TRUE	1	Isoaspartyl peptidase;Isoaspartyl peptidase subunit alpha;Isoaspartyl peptidase subunit beta
eutL	P76541	-0.948	0.0179	0.073	FALSE	TRUE	1	Ethanolamine utilization protein EutL
cpdB	P08331	-0.944	1.5e-05	4.23e-05	FALSE	FALSE	0	2,3-cyclic-nucleotide 2-phosphodiesterase/3-nucleotidase
mlaC	P0ADV7	-0.941	1e-07	2.03e-05	FALSE	FALSE	0	Probable phospholipid-binding protein MlaC
rluA	P0AA37	-0.936	0.0246	0.413	FALSE	TRUE	4	Ribosomal large subunit pseudouridine synthase A
potF	P31133	-0.912	3.21e-06	1.28e-06	FALSE	FALSE	0	Putrescine-binding periplasmic protein
cysP	P16700	-0.906	2.08e-07	3.65e-05	FALSE	FALSE	0	Thiosulfate-binding protein
efeO	P0AB24	-0.868	6.68e-06	8.21e-06	FALSE	FALSE	0	Iron uptake system component EfeO
rluE	P75966	-0.859	0.0529	0.0108	FALSE	TRUE	9	Ribosomal large subunit pseudouridine synthase E
hslJ	P52644	-0.855	0.0231	0.685	FALSE	TRUE	3	Heat shock protein HslJ
rnpA	P0A7Y8	-0.841	0.0349	0.998	FALSE	TRUE	2	Ribonuclease P protein component
fliY	P0AEM9	-0.832	1.56e-06	3.86e-06	FALSE	FALSE	0	Cystine-binding periplasmic protein
cueO	P36649	-0.828	0.00295	0.531	FALSE	FALSE	0	Blue copper oxidase CueO
nth	P0AB83	-0.823	0.149	0.396	FALSE	TRUE	9	Endonuclease III
rfaH	P0AFW0	-0.808	0.0877	0.686	FALSE	FALSE	0	Transcription antitermination protein RfaH
sodC	P0AGD1	-0.805	0.0023	0.606	FALSE	FALSE	0	Superoxide dismutase [Cu-Zn]
plaP	P0AA47	-0.799	0.0783	0.000369	FALSE	TRUE	4	Low-affinity putrescine importer PlaP
ampC	P00811	-0.797	0.106	0.958	FALSE	TRUE	2	Beta-lactamase
livJ	P0AD96	-0.796	3.55e-07	3.45e-06	FALSE	FALSE	0	Leu/Ile/Val-binding protein
fucI	P69922	-0.792	0.476	0.00144	FALSE	TRUE	7	L-fucose isomerase
yicN	P0ADL3	-0.789	0.0781	0.653	FALSE	TRUE	10	Uncharacterized protein YicN
argT	P09551	-0.785	2.02e-06	1.28e-06	FALSE	FALSE	0	Lysine/arginine/ornithine-binding periplasmic protein
tusB	P45530	-0.783	0.0495	0.0764	FALSE	TRUE	9	Protein TusB
potD	P0AFK9	-0.778	9.72e-07	0.000503	FALSE	FALSE	0	Spermidine/putrescine-binding periplasmic protein
pstS	P0AG82	-0.778	0.000957	0.0019	FALSE	FALSE	0	Phosphate-binding protein PstS
ydjF	P77721	-0.776	0.298	0.224	FALSE	TRUE	6	Uncharacterized HTH-type transcriptional regulator YdjF
tadA	P68398	-0.768	0.068	0.473	FALSE	TRUE	10	tRNA-specific adenosine deaminase
sdaC	P0AAD6	-0.764	0.0104	0.157	FALSE	TRUE	1	Serine transporter
artJ	P30860	-0.745	2.5e-06	0.000186	FALSE	FALSE	0	ABC transporter arginine-binding protein 1
bioB	P12996	-0.744	0.000458	0.0452	FALSE	FALSE	0	Biotin synthase
cdh	P06282	-0.742	0.0652	0.156	FALSE	FALSE	0	CDP-diacylglycerol pyrophosphatase
artI	P30859	-0.736	5.77e-06	2.6e-05	FALSE	FALSE	0	Putative ABC transporter arginine-binding protein 2
rpmE	P0A7M9	-0.727	0.0105	0.941	FALSE	FALSE	0	50S ribosomal protein L31
yceI	P0A8X2	-0.723	2.85e-05	0.000329	FALSE	FALSE	0	Protein YceI
yagH	P77713	-0.713	0.000103	0.00252	FALSE	FALSE	0	Putative beta-xylosidase
gutQ	P17115	-0.71	0.000407	0.794	FALSE	FALSE	0	Arabinose 5-phosphate isomerase GutQ
dmsD	P69853	-0.698	0.222	0.115	FALSE	TRUE	3	Tat proofreading chaperone DmsD
yahJ	P77554	-0.698	0.131	0.615	FALSE	TRUE	10	Uncharacterized protein YahJ
alx	P42601	-0.696	0.0422	0.562	FALSE	TRUE	7	Inner membrane protein alx
ydjN	P77529	-0.694	0.00114	0.00755	FALSE	FALSE	0	Uncharacterized symporter YdjN
ybhK	P75767	-0.692	0.425	0.309	FALSE	TRUE	9	Putative gluconeogenesis factor
ygiW	P0ADU5	-0.692	0.0413	0.565	FALSE	FALSE	0	Protein YgiW
ansA	P0A962	-0.691	0.00937	0.104	FALSE	FALSE	0	L-asparaginase 1
adhP	P39451	-0.675	0.279	0.0633	FALSE	TRUE	4	Alcohol dehydrogenase, propanol-preferring
dapF	P0A6K1	-0.673	0.521	0.641	FALSE	TRUE	2	Diaminopimelate epimerase
yebG	P0ACY9	-0.67	0.00352	0.502	FALSE	FALSE	0	Uncharacterized protein YebG
melA	P06720	-0.665	0.239	0.284	FALSE	TRUE	3	Alpha-galactosidase
yqjC	P42616	-0.665	0.027	0.844	FALSE	TRUE	1	Protein YqjC
skp	P0AEU7	-0.661	0.00151	0.0224	FALSE	FALSE	0	Chaperone protein Skp
ypdB	P0AE39	-0.653	0.026	0.0419	FALSE	TRUE	2	Transcriptional regulatory protein YpdB
treF	P62601	-0.637	0.0246	0.0844	FALSE	FALSE	0	Cytoplasmic trehalase
yagG	P75683	-0.635	0.269	0.378	FALSE	TRUE	9	Uncharacterized symporter YagG
ade	P31441	-0.631	0.316	0.265	FALSE	TRUE	10	Adenine deaminase
ybiU	P75791	-0.619	0.00139	0.0493	FALSE	FALSE	0	Uncharacterized protein YbiU
yjbJ	P68206	-0.616	0.223	0.196	FALSE	FALSE	0	UPF0337 protein YjbJ
ompT	P09169	-0.615	0.000278	0.473	FALSE	FALSE	0	Protease 7
holA	P28630	-0.607	0.0382	0.128	FALSE	TRUE	6	DNA polymerase III subunit delta
gatZ	P0C8J8	-0.603	0.105	0.000434	FALSE	FALSE	0	D-tagatose-1,6-bisphosphate aldolase subunit GatZ
lpxK	P27300	-0.601	0.19	0.89	FALSE	TRUE	9	Tetraacyldisaccharide 4-kinase
fdoG	P32176	-0.598	0.000467	0.00144	FALSE	FALSE	0	Formate dehydrogenase-O major subunit
yciC	P21365	-0.598	0.0456	0.365	FALSE	FALSE	0	UPF0259 membrane protein YciC
cirA	P17315	-0.592	0.0306	0.572	FALSE	FALSE	0	Colicin I receptor
gltI	P37902	-0.591	2.85e-05	3.54e-05	FALSE	FALSE	0	Glutamate/aspartate periplasmic-binding protein
trpR	P0A881	-0.591	0.0393	0.692	FALSE	FALSE	0	Trp operon repressor
pspF	P37344	-0.59	0.214	0.844	FALSE	TRUE	6	Psp operon transcriptional activator
mltB	P41052	-0.587	0.398	0.642	FALSE	TRUE	5	Membrane-bound lytic murein transglycosylase B
glnH	P0AEQ3	-0.586	0.00236	6.36e-05	FALSE	FALSE	0	Glutamine-binding periplasmic protein
yegS	P76407	-0.585	0.361	0.64	FALSE	TRUE	4	Lipid kinase YegS
yncE	P76116	-0.58	0.0051	0.768	FALSE	FALSE	0	Uncharacterized protein YncE
psiF	P0AFM4	-0.574	0.0375	0.0697	FALSE	FALSE	0	Phosphate starvation-inducible protein PsiF
lgt	P60955	-0.572	0.123	0.282	FALSE	FALSE	0	Prolipoprotein diacylglyceryl transferase
fumA	P0AC33	-0.568	0.000694	0.0149	FALSE	FALSE	0	Fumarate hydratase class I, aerobic
malM	P03841	-0.56	0.0493	0.000463	FALSE	FALSE	0	Maltose operon periplasmic protein
cysU	P16701	-0.56	0.000935	0.877	FALSE	FALSE	0	Sulfate transport system permease protein CysT
emtA	P0C960	-0.555	0.00756	0.00535	FALSE	FALSE	0	Endo-type membrane-bound lytic murein transglycosylase A
ppiA	P0AFL3	-0.555	0.000181	0.0455	FALSE	FALSE	0	Peptidyl-prolyl cis-trans isomerase A
hmp	P24232	-0.554	0.0548	0.288	FALSE	FALSE	0	Flavohemoprotein
recC	P07648	-0.554	0.282	0.578	FALSE	TRUE	5	RecBCD enzyme subunit RecC
mscK	P77338	-0.553	0.00261	0.000649	FALSE	FALSE	0	Mechanosensitive channel MscK
iscX	P0C0L9	-0.552	0.275	0.382	FALSE	TRUE	1	Protein IscX
mraZ	P22186	-0.551	0.23	0.122	FALSE	TRUE	1	Transcriptional regulator MraZ
ptsH	P0AA04	-0.55	0.0477	0.25	FALSE	FALSE	0	Phosphocarrier protein HPr
ftsW	P0ABG4	-0.545	0.347	0.487	FALSE	TRUE	7	Lipid II flippase FtsW
garR	P0ABQ2	-0.544	0.00312	0.00464	FALSE	FALSE	0	2-hydroxy-3-oxopropionate reductase
zntB	P64423	-0.544	0.338	0.935	FALSE	TRUE	4	Zinc transport protein ZntB
msyB	P25738	-0.541	0.00507	0.0665	FALSE	FALSE	0	Acidic protein MsyB
lamB	P02943	-0.54	0.000686	3.45e-06	FALSE	FALSE	0	Maltoporin
cpxP	P0AE85	-0.539	0.345	0.817	FALSE	TRUE	9	Periplasmic protein CpxP
fimC	P31697	-0.534	0.0916	0.00337	FALSE	TRUE	1	Chaperone protein FimC
yhjE	P37643	-0.532	0.0138	0.00103	FALSE	FALSE	0	Inner membrane metabolite transport protein YhjE
hupB	P0ACF4	-0.522	0.0156	0.0252	FALSE	FALSE	0	DNA-binding protein HU-beta
treA	P13482	-0.521	0.00129	0.662	FALSE	FALSE	0	Periplasmic trehalase
yajG	P0ADA5	-0.517	0.00151	0.00345	FALSE	FALSE	0	Uncharacterized lipoprotein YajG
spy	P77754	-0.515	0.0785	0.722	FALSE	FALSE	0	Spheroplast protein Y
focA	P0AC23	-0.512	0.237	0.000158	FALSE	TRUE	6	Probable formate transporter 1
glcG	P0AEQ1	-0.512	0.0205	0.0491	FALSE	FALSE	0	Protein GlcG
ygbI	P52598	-0.507	0.396	0.53	FALSE	TRUE	9	Uncharacterized HTH-type transcriptional regulator YgbI
gcvR	P0A9I3	-0.506	0.212	0.581	FALSE	FALSE	0	Glycine cleavage system transcriptional repressor
tilS	P52097	-0.504	0.398	0.632	FALSE	TRUE	5	tRNA(Ile)-lysidine synthase
ychJ	P37052	-0.501	0.303	0.687	FALSE	TRUE	5	UPF0225 protein YchJ
livK	P04816	-0.5	3.57e-05	0.000188	FALSE	FALSE	0	Leucine-specific-binding protein
cysD	P21156	-0.496	0.000105	0.923	FALSE	FALSE	0	Sulfate adenylyltransferase subunit 2
yiaD	P37665	-0.495	0.0371	0.267	FALSE	FALSE	0	Probable lipoprotein YiaD
mdh	P61889	-0.49	0.000235	0.84	FALSE	FALSE	0	Malate dehydrogenase
envC	P37690	-0.485	0.0369	0.413	FALSE	FALSE	0	Murein hydrolase activator EnvC
yggN	P0ADS9	-0.478	0.00284	0.0605	FALSE	FALSE	0	Uncharacterized protein YggN
yejL	P0AD24	-0.47	0.377	0.902	FALSE	TRUE	1	UPF0352 protein YejL
creA	P0AE91	-0.469	0.00704	0.622	FALSE	FALSE	0	Protein CreA
fadL	P10384	-0.468	0.000476	0.000329	FALSE	FALSE	0	Long-chain fatty acid transport protein
mtfA	P76346	-0.465	0.0352	0.00271	FALSE	FALSE	0	Protein MtfA
rplR	P0C018	-0.465	0.55	0.524	FALSE	FALSE	0	50S ribosomal protein L18
rpsR	P0A7T7	-0.465	0.0389	0.72	FALSE	FALSE	0	30S ribosomal protein S18
emrA	P27303	-0.464	0.0135	0.966	FALSE	FALSE	0	Multidrug export protein EmrA
trpGD	P00904	-0.463	0.000773	0.025	FALSE	FALSE	0	Bifunctional protein TrpGD;Anthranilate synthase component 2;Anthranilate phosphoribosyltransferase
metA	P07623	-0.462	0.0132	0.142	FALSE	FALSE	0	Homoserine O-succinyltransferase
recF	P0A7H0	-0.459	0.299	0.707	FALSE	TRUE	10	DNA replication and repair protein RecF
nagK	P75959	-0.455	0.302	0.238	FALSE	TRUE	7	N-acetyl-D-glucosamine kinase
dsdA	P00926	-0.453	0.00614	0.135	FALSE	FALSE	0	D-serine dehydratase
argF	P06960	-0.448	0.0176	0.423	FALSE	FALSE	0	Ornithine carbamoyltransferase chain F
pntB	P0AB67	-0.448	0.00197	0.201	FALSE	FALSE	0	NAD(P) transhydrogenase subunit beta
cysM	P16703	-0.447	0.00129	0.00254	FALSE	FALSE	0	Cysteine synthase B
sdaB	P30744	-0.447	0.435	0.747	FALSE	TRUE	9	L-serine dehydratase 2
mgtA	P0ABB8	-0.44	0.0499	0.292	FALSE	FALSE	0	Magnesium-transporting ATPase, P-type 1
ygdQ	P67127	-0.438	0.173	0.944	FALSE	TRUE	10	UPF0053 inner membrane protein YgdQ
yggU	P52060	-0.438	0.197	0.834	FALSE	TRUE	10	UPF0235 protein YggU
moaB	P0AEZ9	-0.431	0.00515	0.123	FALSE	FALSE	0	Molybdenum cofactor biosynthesis protein B
ybiS	P0AAX8	-0.431	0.000705	7.77e-05	FALSE	FALSE	0	Probable L,D-transpeptidase YbiS
yifE	P0ADN2	-0.43	0.00148	1.52e-05	FALSE	FALSE	0	UPF0438 protein YifE
rsmF	P76273	-0.428	0.497	0.586	FALSE	TRUE	9	Ribosomal RNA small subunit methyltransferase F
yeaY	P0AA91	-0.416	0.00568	0.196	FALSE	FALSE	0	Uncharacterized lipoprotein YeaY
rna	P21338	-0.414	0.00017	0.000649	FALSE	FALSE	0	Ribonuclease I
puuB	P37906	-0.413	0.0728	0.000485	FALSE	TRUE	6	Gamma-glutamylputrescine oxidoreductase
yahD	P77736	-0.413	0.283	0.17	FALSE	TRUE	9	Putative ankyrin repeat protein YahD
pntA	P07001	-0.412	0.00318	0.129	FALSE	FALSE	0	NAD(P) transhydrogenase subunit alpha
fadD	P69451	-0.41	0.431	0.012	FALSE	TRUE	5	Long-chain-fatty-acid--CoA ligase
ybeL	P0AAT9	-0.41	0.0103	0.0334	FALSE	FALSE	0	Uncharacterized protein YbeL
bioD1	P13000	-0.406	0.00269	0.142	FALSE	FALSE	0	ATP-dependent dethiobiotin synthetase BioD 1
serB	P0AGB0	-0.404	0.01	0.237	FALSE	FALSE	0	Phosphoserine phosphatase
yrfG	P64636	-0.404	0.323	0.594	FALSE	TRUE	9	GMP/IMP nucleotidase YrfG
ggt	P18956	-0.398	0.0131	0.171	FALSE	FALSE	0	Gamma-glutamyltranspeptidase;Gamma-glutamyltranspeptidase large chain;Gamma-glutamyltranspeptidase small chain
mrdB	P0ABG7	-0.397	0.359	0.548	FALSE	TRUE	9	Rod shape-determining protein RodA
cyoA	P0ABJ1	-0.396	0.0203	0.418	FALSE	FALSE	0	Cytochrome bo(3) ubiquinol oxidase subunit 2
ftsK	P46889	-0.393	0.0349	0.746	FALSE	FALSE	0	DNA translocase FtsK
bioA	P12995	-0.391	0.0844	0.793	FALSE	FALSE	0	Adenosylmethionine-8-amino-7-oxononanoate aminotransferase
fecA	P13036	-0.391	0.455	0.0394	FALSE	TRUE	10	Fe(3+) dicitrate transport protein FecA
ycaK	P43340	-0.391	0.477	0.252	FALSE	TRUE	10	Uncharacterized NAD(P)H oxidoreductase YcaK
mdoD	P40120	-0.388	0.00439	0.00141	FALSE	FALSE	0	Glucans biosynthesis protein D
fadI	P76503	-0.387	0.0198	0.000256	FALSE	FALSE	0	3-ketoacyl-CoA thiolase
gltP	P21345	-0.386	0.646	0.894	FALSE	TRUE	9	Proton glutamate symport protein
menD	P17109	-0.383	0.461	0.476	FALSE	TRUE	3	2-succinyl-5-enolpyruvyl-6-hydroxy-3-cyclohexene-1-carboxylate synthase
rpmA	P0A7L8	-0.382	0.201	0.642	FALSE	FALSE	0	50S ribosomal protein L27
ygaM	P0ADQ7	-0.382	0.186	0.0964	FALSE	FALSE	0	Uncharacterized protein YgaM
yhhA	P0ADX7	-0.38	0.236	0.48	FALSE	FALSE	0	Uncharacterized protein YhhA
yggL	P38521	-0.378	0.0137	0.738	FALSE	FALSE	0	Uncharacterized protein YggL
loiP	P25894	-0.376	0.0485	0.0345	FALSE	FALSE	0	Metalloprotease LoiP
mdtK	P37340	-0.374	0.0311	0.000679	FALSE	FALSE	0	Multidrug resistance protein MdtK
yghA	P0AG84	-0.372	0.0168	0.000444	FALSE	FALSE	0	Uncharacterized oxidoreductase YghA
hslV	P0A7B8	-0.369	0.106	0.132	FALSE	FALSE	0	ATP-dependent protease subunit HslV
gsiB	P75797	-0.367	0.0233	0.000256	FALSE	FALSE	0	Glutathione-binding protein GsiB
nanE	P0A761	-0.365	0.0159	0.0239	FALSE	FALSE	0	Putative N-acetylmannosamine-6-phosphate 2-epimerase
rsmG	P0A6U5	-0.363	0.00245	0.0367	FALSE	FALSE	0	Ribosomal RNA small subunit methyltransferase G
metI	P31547	-0.362	0.0729	0.11	FALSE	FALSE	0	D-methionine transport system permease protein MetI
metQ	P28635	-0.362	0.000994	0.215	FALSE	FALSE	0	D-methionine-binding lipoprotein MetQ
lpoB	P0AB38	-0.36	0.00529	0.14	FALSE	FALSE	0	Penicillin-binding protein activator LpoB
malT	P06993	-0.36	0.0278	0.00979	FALSE	FALSE	0	HTH-type transcriptional regulator MalT
trpA	P0A877	-0.36	0.0086	0.298	FALSE	FALSE	0	Tryptophan synthase alpha chain
cysJ	P38038	-0.359	0.000905	0.0106	FALSE	FALSE	0	Sulfite reductase [NADPH] flavoprotein alpha-component
miaA	P16384	-0.357	0.0513	0.854	FALSE	FALSE	0	tRNA dimethylallyltransferase
yacG	P0A8H8	-0.353	0.0332	0.113	FALSE	FALSE	0	DNA gyrase inhibitor YacG
fadA	P21151	-0.351	0.0461	0.000517	FALSE	FALSE	0	3-ketoacyl-CoA thiolase
yfcD	P65556	-0.35	0.00286	0.214	FALSE	FALSE	0	Uncharacterized Nudix hydrolase YfcD
agp	P19926	-0.349	0.0342	0.00317	FALSE	FALSE	0	Glucose-1-phosphatase
borD	P77330	-0.349	0.0545	0.00396	FALSE	FALSE	0	Lipoprotein bor homolog from lambdoid prophage DLP12
yhiI	P37626	-0.348	0.0861	0.983	FALSE	FALSE	0	Uncharacterized protein YhiI
yojI	P33941	-0.348	0.3	0.296	FALSE	TRUE	1	ABC transporter ATP-binding protein YojI
uraA	P0AGM7	-0.347	0.0669	0.000119	FALSE	FALSE	0	Uracil permease
pliG	P76002	-0.344	0.626	0.572	FALSE	FALSE	0	Inhibitor of g-type lysozyme
ushA	P07024	-0.344	0.000298	0.00396	FALSE	FALSE	0	Protein UshA;UDP-sugar hydrolase;5-nucleotidase
yfcH	P77775	-0.344	0.00798	0.0585	FALSE	FALSE	0	Epimerase family protein YfcH
cysN	P23845	-0.34	0.00262	0.176	FALSE	FALSE	0	Sulfate adenylyltransferase subunit 1
moaE	P30749	-0.34	0.0197	0.973	FALSE	FALSE	0	Molybdopterin synthase catalytic subunit
puuA	P78061	-0.339	0.374	0.000325	FALSE	TRUE	6	Gamma-glutamylputrescine synthetase PuuA
tnaA	P0A853	-0.339	0.0348	0.0738	FALSE	FALSE	0	Tryptophanase
rplT	P0A7L3	-0.337	0.0499	0.469	FALSE	FALSE	0	50S ribosomal protein L20
gcvA	P0A9F6	-0.334	0.0144	0.0056	FALSE	FALSE	0	Glycine cleavage system transcriptional activator
hisQ	P52094	-0.333	0.0469	0.423	FALSE	FALSE	0	Histidine transport system permease protein HisQ
panD	P0A790	-0.333	0.00531	0.00845	FALSE	FALSE	0	Aspartate 1-decarboxylase;Aspartate 1-decarboxylase beta chain;Aspartate 1-decarboxylase alpha chain
rsxG	P77285	-0.333	0.238	0.319	FALSE	TRUE	4	Electron transport complex subunit RsxG
cytR	P0ACN7	-0.331	0.555	0.0289	FALSE	TRUE	6	HTH-type transcriptional repressor CytR
dsbG	P77202	-0.331	0.00681	0.192	FALSE	FALSE	0	Thiol:disulfide interchange protein DsbG
yehX	P33360	-0.33	0.058	0.245	FALSE	FALSE	0	Putative osmoprotectant uptake system ATP-binding protein YehX
nupC	P0AFF2	-0.329	0.00856	0.00943	FALSE	FALSE	0	Nucleoside permease NupC
metK	P0A817	-0.328	0.0186	0.142	FALSE	FALSE	0	S-adenosylmethionine synthase
pyrE	P0A7E3	-0.328	0.0299	0.668	FALSE	FALSE	0	Orotate phosphoribosyltransferase
phoU	P0A9K7	-0.324	0.108	0.0157	FALSE	FALSE	0	Phosphate-specific transport system accessory protein PhoU
nlpE	P40710	-0.323	0.00231	0.169	FALSE	FALSE	0	Lipoprotein NlpE
lsrF	P76143	-0.322	0.105	0.0431	FALSE	FALSE	0	Uncharacterized aldolase LsrF
sanA	P0AFY2	-0.322	0.438	0.159	FALSE	TRUE	10	Protein SanA
mscS	P0C0S1	-0.319	0.00155	0.000277	FALSE	FALSE	0	Small-conductance mechanosensitive channel
rcnB	P64534	-0.318	0.00475	0.0351	FALSE	FALSE	0	Nickel/cobalt homeostasis protein RcnB
yfdH	P77293	-0.317	0.113	0.802	FALSE	FALSE	0	Bactoprenol glucosyl transferase homolog from prophage CPS-53
ispB	P0AD57	-0.316	0.0285	0.603	FALSE	FALSE	0	Octaprenyl-diphosphate synthase
trpE	P00895	-0.316	0.0112	0.245	FALSE	FALSE	0	Anthranilate synthase component 1
gpsA	P0A6S7	-0.315	0.0055	0.00545	FALSE	FALSE	0	Glycerol-3-phosphate dehydrogenase [NAD(P)+]
dppA	P23847	-0.314	0.0137	0.00103	FALSE	FALSE	0	Periplasmic dipeptide transport protein
metJ	P0A8U6	-0.312	0.004	0.0358	FALSE	FALSE	0	Met repressor
yejF	P33916	-0.311	0.379	2.86e-05	FALSE	TRUE	9	Uncharacterized ABC transporter ATP-binding protein YejF
groL	P0A6F5	-0.31	0.011	0.323	FALSE	FALSE	0	60 kDa chaperonin
ftsN	P29131	-0.309	0.209	0.888	FALSE	FALSE	0	Cell division protein FtsN
zapB	P0AF36	-0.308	0.45	0.449	FALSE	FALSE	0	Cell division protein ZapB
dcm	P0AED9	-0.305	0.089	0.0208	FALSE	FALSE	0	DNA-cytosine methyltransferase
cydD	P29018	-0.301	0.0282	0.511	FALSE	FALSE	0	ATP-binding/permease protein CydD
stpA	P0ACG1	-0.301	0.112	0.000649	FALSE	FALSE	0	DNA-binding protein StpA
hupA	P0ACF0	-0.3	0.0367	0.0224	FALSE	FALSE	0	DNA-binding protein HU-alpha
yggE	P0ADS6	-0.3	0.0114	0.473	FALSE	FALSE	0	Uncharacterized protein YggE
dnaT	P0A8J2	-0.299	0.339	0.974	FALSE	TRUE	4	Primosomal protein 1
ygaP	P55734	-0.297	0.57	0.0843	FALSE	TRUE	8	Inner membrane protein YgaP
yhhM	P37615	-0.297	0.532	0.844	FALSE	TRUE	2	Uncharacterized protein YhhM
kup	P63183	-0.295	0.578	0.822	FALSE	TRUE	2	Low affinity potassium transport system protein kup
lipB	P60720	-0.295	0.15	0.764	FALSE	FALSE	0	Octanoyltransferase
tpx	P0A862	-0.295	0.0104	0.263	FALSE	FALSE	0	Thiol peroxidase
ybhC	P46130	-0.295	0.0245	0.00083	FALSE	FALSE	0	Putative acyl-CoA thioester hydrolase YbhC
yhbO	P45470	-0.295	0.0335	0.000267	FALSE	FALSE	0	Protein YhbO
ybiV	P75792	-0.294	0.694	0.619	FALSE	TRUE	1	Sugar phosphatase YbiV
corA	P0ABI4	-0.291	0.0408	0.116	FALSE	FALSE	0	Magnesium transport protein CorA
msrB	P0A746	-0.291	0.0625	0.858	FALSE	FALSE	0	Peptide methionine sulfoxide reductase MsrB
trpC	P00909	-0.291	0.0279	0.128	FALSE	FALSE	0	Tryptophan biosynthesis protein TrpCF;Indole-3-glycerol phosphate synthase;N-(5-phospho-ribosyl)anthranilate isomerase
ypeA	P76539	-0.291	0.0196	0.312	FALSE	FALSE	0	Acetyltransferase YpeA
btuB	P06129	-0.289	0.00157	3.45e-06	FALSE	FALSE	0	Vitamin B12 transporter BtuB
sufA	P77667	-0.289	0.361	0.125	FALSE	FALSE	0	Protein SufA
cyaA	P00936	-0.287	0.0172	0.39	FALSE	FALSE	0	Adenylate cyclase
glcB	P37330	-0.287	0.153	0.139	FALSE	FALSE	0	Malate synthase G
iscS	P0A6B7	-0.286	0.0139	0.00338	FALSE	FALSE	0	Cysteine desulfurase IscS
sufE	P76194	-0.286	0.501	0.0764	FALSE	TRUE	1	Cysteine desulfuration protein SufE
ydcL	P64451	-0.286	0.0392	0.000229	FALSE	FALSE	0	Uncharacterized lipoprotein YdcL
degP	P0C0V0	-0.284	0.0221	0.185	FALSE	FALSE	0	Periplasmic serine endoprotease DegP
yhjG	P37645	-0.282	0.0296	0.105	FALSE	FALSE	0	Uncharacterized protein YhjG
betT	P0ABC9	-0.281	0.0705	3.05e-06	FALSE	FALSE	0	High-affinity choline transport protein
coaE	P0A6I9	-0.28	0.174	0.0826	FALSE	TRUE	1	Dephospho-CoA kinase
codB	P0AA82	-0.28	0.178	0.928	FALSE	FALSE	0	Cytosine permease
fucU	P0AEN8	-0.28	0.132	0.0103	FALSE	FALSE	0	L-fucose mutarotase
groS	P0A6F9	-0.28	0.0516	0.332	FALSE	FALSE	0	10 kDa chaperonin
putP	P07117	-0.279	0.165	0.15	FALSE	FALSE	0	Sodium/proline symporter
hybD	P37182	-0.278	0.633	0.238	FALSE	TRUE	8	Hydrogenase 2 maturation protease
nadK	P0A7B3	-0.277	0.164	0.738	FALSE	FALSE	0	NAD kinase
tolB	P0A855	-0.277	0.00299	0.000339	FALSE	FALSE	0	Protein TolB
yeiR	P33030	-0.277	0.0155	0.206	FALSE	FALSE	0	Uncharacterized protein YeiR
cysH	P17854	-0.276	0.0158	0.392	FALSE	FALSE	0	Phosphoadenosine phosphosulfate reductase
amiB	P26365	-0.274	0.646	0.00305	FALSE	TRUE	6	N-acetylmuramoyl-L-alanine amidase AmiB
fiu	P75780	-0.274	0.248	0.00848	FALSE	FALSE	0	Catecholate siderophore receptor Fiu
cysI	P17846	-0.273	0.0195	0.0243	FALSE	FALSE	0	Sulfite reductase [NADPH] hemoprotein beta-component
kch	P31069	-0.272	0.0915	0.603	FALSE	FALSE	0	Voltage-gated potassium channel Kch
yrfF	P45800	-0.271	0.223	0.0449	FALSE	FALSE	0	Putative membrane protein IgaA homolog
pncA	P21369	-0.27	0.0326	0.0501	FALSE	FALSE	0	Pyrazinamidase/nicotinamidase
rclA	P77212	-0.27	0.234	0.531	FALSE	FALSE	0	Probable pyridine nucleotide-disulfide oxidoreductase RclA
fepA	P05825	-0.269	0.264	0.62	FALSE	FALSE	0	Ferrienterobactin receptor
fadB	P21177	-0.264	0.0695	0.000209	FALSE	FALSE	0	Fatty acid oxidation complex subunit alpha;Enoyl-CoA hydratase/Delta(3)-cis-Delta(2)-trans-enoyl-CoA isomerase/3-hydroxybutyryl-CoA epimerase;3-hydroxyacyl-CoA dehydrogenase
eutB	P0AEJ6	-0.263	0.0905	0.279	FALSE	FALSE	0	Ethanolamine ammonia-lyase heavy chain
gudD	P0AES2	-0.262	0.284	0.279	FALSE	FALSE	0	Glucarate dehydratase
ilvH	P00894	-0.262	0.00773	0.0116	FALSE	FALSE	0	Acetolactate synthase isozyme 3 small subunit
modF	P31060	-0.261	0.0203	0.0825	FALSE	FALSE	0	Putative molybdenum transport ATP-binding protein ModF
hisP	P07109	-0.26	0.129	0.367	FALSE	FALSE	0	Histidine transport ATP-binding protein HisP
metN	P30750	-0.26	0.0484	0.207	FALSE	FALSE	0	Methionine import ATP-binding protein MetN
dnaK	P0A6Y8	-0.258	0.00858	0.188	FALSE	FALSE	0	Chaperone protein DnaK
ycgL	P0AB43	-0.258	0.0793	0.461	FALSE	FALSE	0	Protein YcgL
rppH	P0A776	-0.257	0.722	0.779	FALSE	TRUE	4	RNA pyrophosphohydrolase
gcl	P0AEP7	-0.254	0.349	0.145	FALSE	TRUE	4	Glyoxylate carboligase
rsmE	P0AGL7	-0.252	0.0373	0.0151	FALSE	FALSE	0	Ribosomal RNA small subunit methyltransferase E
ybaY	P77717	-0.251	0.0118	0.00111	FALSE	FALSE	0	Uncharacterized lipoprotein YbaY
yajD	P0AAQ2	-0.25	0.501	0.00091	FALSE	TRUE	6	Uncharacterized protein YajD
allR	P0ACN4	-0.25	0.0438	0.144	FALSE	FALSE	0	HTH-type transcriptional repressor AllR
purF	P0AG16	-0.25	0.0412	0.438	FALSE	FALSE	0	Amidophosphoribosyltransferase
mtlA	P00550	-0.248	0.0182	6.27e-09	FALSE	FALSE	0	PTS system mannitol-specific EIICBA component;Mannitol permease IIC component;Mannitol-specific phosphotransferase enzyme IIB component;Mannitol-specific phosphotransferase enzyme IIA component
fumB	P14407	-0.247	0.824	0.0747	FALSE	TRUE	6	Fumarate hydratase class I, anaerobic
yibN	P0AG27	-0.247	0.00526	0.224	FALSE	FALSE	0	Uncharacterized protein YibN
yqgF	P0A8I1	-0.247	0.154	0.302	FALSE	FALSE	0	Putative Holliday junction resolvase
avtA	P09053	-0.246	0.0187	0.161	FALSE	FALSE	0	Valine--pyruvate aminotransferase
tusA	P0A890	-0.246	0.734	0.443	FALSE	TRUE	9	Sulfurtransferase TusA
hchA	P31658	-0.245	0.0458	0.0841	FALSE	FALSE	0	Molecular chaperone Hsp31 and glyoxalase 3
yhjJ	P37648	-0.245	0.0113	0.0936	FALSE	FALSE	0	Protein YhjJ
sdhA	P0AC41	-0.244	0.0205	0.317	FALSE	FALSE	0	Succinate dehydrogenase flavoprotein subunit
trpB	P0A879	-0.244	0.0149	0.556	FALSE	FALSE	0	Tryptophan synthase beta chain
yjgR	P39342	-0.244	0.0691	0.0537	FALSE	FALSE	0	Uncharacterized protein YjgR
yehD	P33343	-0.243	0.7	0.323	FALSE	TRUE	10	Uncharacterized fimbrial-like protein YehD
mlaA	P76506	-0.242	0.771	0.971	FALSE	TRUE	1	Probable phospholipid-binding lipoprotein MlaA
folP	P0AC13	-0.241	0.00844	0.00423	FALSE	FALSE	0	Dihydropteroate synthase
pgl	P52697	-0.241	0.0267	0.101	FALSE	FALSE	0	6-phosphogluconolactonase
ynhG	P76193	-0.241	0.0359	0.0518	FALSE	FALSE	0	Probable L,D-transpeptidase YnhG
ettA	P0A9W3	-0.24	0.00917	0.00113	FALSE	FALSE	0	Energy-dependent translational throttle protein EttA
yciE	P21363	-0.239	0.0328	0.729	FALSE	FALSE	0	Protein YciE
yedP	P76329	-0.239	0.142	0.749	FALSE	FALSE	0	Putative mannosyl-3-phosphoglycerate phosphatase
acs	P27550	-0.238	0.0158	8.06e-05	FALSE	FALSE	0	Acetyl-coenzyme A synthetase
ydhS	P77148	-0.236	0.136	0.44	FALSE	FALSE	0	Uncharacterized protein YdhS
ydgH	P76177	-0.235	0.00134	0.00254	FALSE	FALSE	0	Protein YdgH
gsiA	P75796	-0.232	0.119	0.0425	FALSE	FALSE	0	Glutathione import ATP-binding protein GsiA
rsxC	P77611	-0.229	0.566	0.606	FALSE	FALSE	0	Electron transport complex subunit RsxC
putA	P09546	-0.228	0.29	0.729	FALSE	FALSE	0	Bifunctional protein PutA;Proline dehydrogenase;Delta-1-pyrroline-5-carboxylate dehydrogenase
yhaJ	P67660	-0.228	0.0209	0.00148	FALSE	FALSE	0	Uncharacterized HTH-type transcriptional regulator YhaJ
yicH	P31433	-0.228	0.0435	0.526	FALSE	FALSE	0	Uncharacterized protein YicH
grxA	P68688	-0.227	0.184	0.854	FALSE	FALSE	0	Glutaredoxin-1
glmS	P17169	-0.226	0.0174	0.00371	FALSE	FALSE	0	Glutamine--fructose-6-phosphate aminotransferase [isomerizing]
pyrH	P0A7E9	-0.226	0.0957	0.572	FALSE	FALSE	0	Uridylate kinase
ychN	P0AB52	-0.225	0.0303	0.337	FALSE	FALSE	0	Protein YchN
sstT	P0AGE4	-0.224	0.472	0.00922	FALSE	FALSE	0	Serine/threonine transporter SstT
yfcE	P67095	-0.223	0.146	0.13	FALSE	FALSE	0	Phosphodiesterase YfcE
pgsA	P0ABF8	-0.222	0.161	0.288	FALSE	FALSE	0	CDP-diacylglycerol--glycerol-3-phosphate 3-phosphatidyltransferase
dut	P06968	-0.221	0.0361	0.481	FALSE	FALSE	0	Deoxyuridine 5-triphosphate nucleotidohydrolase
fepC	P23878	-0.221	0.737	0.594	FALSE	TRUE	9	Ferric enterobactin transport ATP-binding protein FepC
galM	P0A9C3	-0.221	0.117	0.495	FALSE	FALSE	0	Aldose 1-epimerase
yaaA	P0A8I3	-0.22	0.039	0.027	FALSE	FALSE	0	UPF0246 protein YaaA
metB	P00935	-0.219	0.0927	0.0089	FALSE	FALSE	0	Cystathionine gamma-synthase
modA	P37329	-0.219	0.314	0.0465	FALSE	FALSE	0	Molybdate-binding periplasmic protein
yccF	P0AB12	-0.219	0.248	0.692	FALSE	FALSE	0	Inner membrane protein YccF
ytfL	P0AE45	-0.216	0.637	0.00754	FALSE	TRUE	6	UPF0053 inner membrane protein YtfL
glmM	P31120	-0.216	0.0173	0.000871	FALSE	FALSE	0	Phosphoglucosamine mutase
yciK	P31808	-0.216	0.0925	0.0458	FALSE	FALSE	0	Uncharacterized oxidoreductase YciK
gph	P32662	-0.215	0.0179	0.929	FALSE	FALSE	0	Phosphoglycolate phosphatase
folC	P08192	-0.213	0.0711	0.173	FALSE	FALSE	0	Bifunctional protein FolC;Folylpolyglutamate synthase;Dihydrofolate synthase
bepA	P66948	-0.212	0.0251	0.0923	FALSE	FALSE	0	Beta-barrel assembly-enhancing protease
ghxP	P0AF52	-0.211	0.036	0.000105	FALSE	FALSE	0	Guanine/hypoxanthine permease GhxP
argE	P23908	-0.21	0.0239	0.0217	FALSE	FALSE	0	Acetylornithine deacetylase
apaH	P05637	-0.209	0.143	0.246	FALSE	FALSE	0	Bis(5-nucleosyl)-tetraphosphatase [symmetrical]
apt	P69503	-0.208	0.112	0.981	FALSE	FALSE	0	Adenine phosphoribosyltransferase
amiA	P36548	-0.207	0.525	0.000188	FALSE	TRUE	3	N-acetylmuramoyl-L-alanine amidase AmiA
mqo	P33940	-0.207	0.63	0.000277	FALSE	TRUE	6	Malate:quinone oxidoreductase
hdhA	P0AET8	-0.206	0.261	0.352	FALSE	FALSE	0	7-alpha-hydroxysteroid dehydrogenase
ydhZ	P0ACX5	-0.206	0.742	0.316	FALSE	TRUE	1	Uncharacterized protein YdhZ
hyi	P30147	-0.203	0.487	0.0393	FALSE	TRUE	7	Hydroxypyruvate isomerase
aroK	P0A6D7	-0.202	0.0211	0.746	FALSE	FALSE	0	Shikimate kinase 1
hslO	P0A6Y5	-0.202	0.022	0.073	FALSE	FALSE	0	33 kDa chaperonin
pspA	P0AFM6	-0.201	0.403	0.353	FALSE	FALSE	0	Phage shock protein A
aroB	P07639	-0.2	0.0905	0.00451	FALSE	FALSE	0	3-dehydroquinate synthase
aroC	P12008	-0.2	0.0278	0.327	FALSE	FALSE	0	Chorismate synthase
hscB	P0A6L9	-0.2	0.172	0.025	FALSE	FALSE	0	Co-chaperone protein HscB
moaC	P0A738	-0.2	0.0483	0.0396	FALSE	FALSE	0	Cyclic pyranopterin monophosphate synthase accessory protein
prs	P0A717	-0.2	0.0717	0.259	FALSE	FALSE	0	Ribose-phosphate pyrophosphokinase
rep	P09980	-0.2	0.112	0.944	FALSE	FALSE	0	ATP-dependent DNA helicase Rep
dnaJ	P08622	-0.199	0.151	0.239	FALSE	FALSE	0	Chaperone protein DnaJ
rpmC	P0A7M6	-0.199	0.0779	0.572	FALSE	FALSE	0	50S ribosomal protein L29
mppA	P77348	-0.198	0.0396	0.00137	FALSE	FALSE	0	Periplasmic murein peptide-binding protein
slp	P37194	-0.196	0.46	0.0428	FALSE	FALSE	0	Outer membrane protein slp
purH	P15639	-0.196	0.0304	0.232	FALSE	FALSE	0	Bifunctional purine biosynthesis protein PurH;Phosphoribosylaminoimidazolecarboxamide formyltransferase;IMP cyclohydrolase
aldA	P25553	-0.195	0.148	0.0138	FALSE	FALSE	0	Lactaldehyde dehydrogenase
cysC	P0A6J1	-0.195	0.0355	0.203	FALSE	FALSE	0	Adenylyl-sulfate kinase
ghrA	P75913	-0.195	0.115	0.00233	FALSE	FALSE	0	Glyoxylate/hydroxypyruvate reductase A
holD	P28632	-0.195	0.455	0.879	FALSE	TRUE	1	DNA polymerase III subunit psi
accB	P0ABD8	-0.194	0.0512	0.979	FALSE	FALSE	0	Biotin carboxyl carrier protein of acetyl-CoA carboxylase
sufD	P77689	-0.194	0.198	0.00205	FALSE	FALSE	0	FeS cluster assembly protein SufD
ucpA	P37440	-0.194	0.103	0.00661	FALSE	FALSE	0	Oxidoreductase UcpA
ybgF	P45955	-0.194	0.0225	0.000531	FALSE	FALSE	0	Uncharacterized protein YbgF
ompW	P0A915	-0.193	0.308	0.00511	FALSE	FALSE	0	Outer membrane protein W
wecG	P27836	-0.193	0.0738	0.594	FALSE	FALSE	0	UDP-N-acetyl-D-mannosaminuronic acid transferase
argR	P0A6D0	-0.192	0.292	0.991	FALSE	TRUE	2	Arginine repressor
fdoH	P0AAJ5	-0.191	0.433	0.0438	FALSE	FALSE	0	Formate dehydrogenase-O iron-sulfur subunit
waaA	P0AC75	-0.191	0.209	0.107	FALSE	FALSE	0	3-deoxy-D-manno-octulosonic acid transferase
yhgF	P46837	-0.191	0.0561	0.972	FALSE	FALSE	0	Protein YhgF
ompF	P02931	-0.19	0.144	4.64e-07	FALSE	FALSE	0	Outer membrane protein F
coaA	P0A6I3	-0.19	0.0757	0.015	FALSE	FALSE	0	Pantothenate kinase
fadH	P42593	-0.19	0.363	0.000797	FALSE	FALSE	0	2,4-dienoyl-CoA reductase [NADPH]
gntR	P0ACP5	-0.19	0.0632	0.0054	FALSE	FALSE	0	HTH-type transcriptional regulator GntR
tdk	P23331	-0.19	0.14	0.918	FALSE	FALSE	0	Thymidine kinase
mcrB	P15005	-0.189	0.621	1.28e-06	FALSE	TRUE	9	5-methylcytosine-specific restriction enzyme B
xseA	P04994	-0.189	0.0458	0.504	FALSE	FALSE	0	Exodeoxyribonuclease 7 large subunit
glnB	P0A9Z1	-0.188	0.149	0.866	FALSE	FALSE	0	Nitrogen regulatory protein P-II 1
lptF	P0AF98	-0.188	0.3	0.154	FALSE	FALSE	0	Lipopolysaccharide export system permease protein LptF
nanA	P0A6L4	-0.186	0.133	0.00926	FALSE	FALSE	0	N-acetylneuraminate lyase
adeP	P31466	-0.185	0.661	0.0205	FALSE	FALSE	0	Adenine permease AdeP
proC	P0A9L8	-0.184	0.177	0.0837	FALSE	FALSE	0	Pyrroline-5-carboxylate reductase
cpxA	P0AE82	-0.183	0.223	0.0168	FALSE	FALSE	0	Sensor protein CpxA
ubiC	P26602	-0.183	0.389	0.707	FALSE	FALSE	0	Chorismate pyruvate-lyase
purT	P33221	-0.182	0.0944	0.309	FALSE	FALSE	0	Phosphoribosylglycinamide formyltransferase 2
yfeY	P76537	-0.182	0.155	0.0408	FALSE	FALSE	0	Uncharacterized protein YfeY
fumC	P05042	-0.18	0.0565	0.000503	FALSE	FALSE	0	Fumarate hydratase class II
hldE	P76658	-0.18	0.163	0.355	FALSE	FALSE	0	Bifunctional protein HldE;D-beta-D-heptose 7-phosphate kinase;D-beta-D-heptose 1-phosphate adenylyltransferase
glpK	P0A6F3	-0.179	0.233	2.22e-05	FALSE	FALSE	0	Glycerol kinase
puuD	P76038	-0.179	0.681	0.000649	FALSE	TRUE	6	Gamma-glutamyl-gamma-aminobutyrate hydrolase PuuD
sbp	P0AG78	-0.179	0.255	0.000188	FALSE	FALSE	0	Sulfate-binding protein
tdh	P07913	-0.179	0.218	0.0654	FALSE	FALSE	0	L-threonine 3-dehydrogenase
argD	P18335	-0.178	0.0897	0.808	FALSE	FALSE	0	Acetylornithine/succinyldiaminopimelate aminotransferase
htpG	P0A6Z3	-0.177	0.15	0.473	FALSE	FALSE	0	Chaperone protein HtpG
ydcF	P34209	-0.177	0.157	0.373	FALSE	FALSE	0	Protein YdcF
ysgA	P56262	-0.177	0.2	0.0973	FALSE	FALSE	0	Putative carboxymethylenebutenolidase
purK	P09029	-0.176	0.0331	0.179	FALSE	FALSE	0	N5-carboxyaminoimidazole ribonucleotide synthase
rimM	P0A7X6	-0.176	0.0357	0.0452	FALSE	FALSE	0	Ribosome maturation factor RimM
acrB	P31224	-0.173	0.0517	0.19	FALSE	FALSE	0	Multidrug efflux pump subunit AcrB
slyB	P0A905	-0.173	0.203	0.07	FALSE	FALSE	0	Outer membrane lipoprotein SlyB
accD	P0A9Q5	-0.172	0.105	0.416	FALSE	FALSE	0	Acetyl-coenzyme A carboxylase carboxyl transferase subunit beta
djlA	P31680	-0.172	0.724	0.786	FALSE	TRUE	5	DnaJ-like protein DjlA
pcm	P0A7A5	-0.172	0.383	0.256	FALSE	FALSE	0	Protein-L-isoaspartate O-methyltransferase
ybjP	P75818	-0.172	0.191	0.448	FALSE	FALSE	0	Uncharacterized lipoprotein YbjP
yeaK	P64483	-0.172	0.176	0.469	FALSE	FALSE	0	Uncharacterized protein YeaK
ascG	P24242	-0.17	0.286	0.176	FALSE	FALSE	0	HTH-type transcriptional regulator AscG
malQ	P15977	-0.17	0.0657	0.269	FALSE	FALSE	0	4-alpha-glucanotransferase
entF	P11454	-0.169	0.481	0.124	FALSE	FALSE	0	Enterobactin synthase component F
fpr	P28861	-0.169	0.101	0.0123	FALSE	FALSE	0	Ferredoxin--NADP reductase
yceH	P29217	-0.169	0.131	0.00602	FALSE	FALSE	0	UPF0502 protein YceH
leuA	P09151	-0.168	0.0171	0.0212	FALSE	FALSE	0	2-isopropylmalate synthase
murA	P0A749	-0.167	0.0261	9.61e-05	FALSE	FALSE	0	UDP-N-acetylglucosamine 1-carboxyvinyltransferase
slmA	P0C093	-0.167	0.376	0.469	FALSE	FALSE	0	Nucleoid occlusion factor SlmA
ndk	P0A763	-0.166	0.177	0.00124	FALSE	FALSE	0	Nucleoside diphosphate kinase
uvrA	P0A698	-0.166	0.22	0.317	FALSE	FALSE	0	UvrABC system protein A
yodD	P64519	-0.165	0.823	0.0208	FALSE	TRUE	6	Uncharacterized protein YodD
uxuB	P39160	-0.165	0.239	0.0266	FALSE	FALSE	0	D-mannonate oxidoreductase
yeaD	P39173	-0.165	0.207	0.416	FALSE	FALSE	0	Putative glucose-6-phosphate 1-epimerase
yfgD	P76569	-0.165	0.0727	0.577	FALSE	FALSE	0	Uncharacterized protein YfgD
ybjD	P75828	-0.164	0.342	0.553	FALSE	TRUE	1	Uncharacterized protein YbjD
yecM	P52007	-0.164	0.284	0.0445	FALSE	FALSE	0	Protein YecM
rfbD	P37760	-0.162	0.0515	0.201	FALSE	FALSE	0	dTDP-4-dehydrorhamnose reductase
alkA	P04395	-0.161	0.103	0.0142	FALSE	FALSE	0	DNA-3-methyladenine glycosylase 2
sufS	P77444	-0.161	0.303	0.00403	FALSE	FALSE	0	Cysteine desulfurase
yedQ	P76330	-0.161	0.112	0.251	FALSE	FALSE	0	Probable diguanylate cyclase YedQ
prr	P77674	-0.16	0.494	0.258	FALSE	FALSE	0	Gamma-aminobutyraldehyde dehydrogenase
rlpA	P10100	-0.16	0.0503	0.000201	FALSE	FALSE	0	Rare lipoprotein A
lysA	P00861	-0.159	0.0828	0.0143	FALSE	FALSE	0	Diaminopimelate decarboxylase
upp	P0A8F0	-0.159	0.0667	0.000531	FALSE	FALSE	0	Uracil phosphoribosyltransferase
fur	P0A9A9	-0.158	0.136	0.0172	FALSE	FALSE	0	Ferric uptake regulation protein
hsdS	P05719	-0.158	0.65	0.842	FALSE	FALSE	0	Type-1 restriction enzyme EcoKI specificity protein
sucA	P0AFG3	-0.158	0.195	0.826	FALSE	FALSE	0	2-oxoglutarate dehydrogenase E1 component
iscU	P0ACD4	-0.157	0.29	0.064	FALSE	FALSE	0	Iron-sulfur cluster assembly scaffold protein IscU
purD	P15640	-0.157	0.106	0.963	FALSE	FALSE	0	Phosphoribosylamine--glycine ligase
sdhB	P07014	-0.157	0.22	0.171	FALSE	FALSE	0	Succinate dehydrogenase iron-sulfur subunit
fusA	P0A6M8	-0.156	0.0347	0.00302	FALSE	FALSE	0	Elongation factor G
yfbR	P76491	-0.156	0.329	0.222	FALSE	FALSE	0	5-deoxynucleotidase YfbR
ftsP	P26648	-0.155	0.222	0.441	FALSE	FALSE	0	Cell division protein FtsP
eco	P23827	-0.154	0.217	0.0495	FALSE	FALSE	0	Ecotin
gpmA	P62707	-0.154	0.0963	0.0134	FALSE	FALSE	0	2,3-bisphosphoglycerate-dependent phosphoglycerate mutase
murJ	P0AF16	-0.154	0.439	0.103	FALSE	TRUE	1	Lipid II flippase MurJ
nagE	P09323	-0.154	0.164	0.019	FALSE	FALSE	0	PTS system N-acetylglucosamine-specific EIICBA component;N-acetylglucosamine permease IIC component;N-acetylglucosamine-specific phosphotransferase enzyme IIB component;N-acetylglucosamine-specific phosphotransferase enzyme IIA component
galU	P0AEP3	-0.153	0.19	0.0799	FALSE	FALSE	0	UTP--glucose-1-phosphate uridylyltransferase
prc	P23865	-0.153	0.0254	0.0041	FALSE	FALSE	0	Tail-specific protease
ybhA	P21829	-0.153	0.236	0.647	FALSE	FALSE	0	Pyridoxal phosphate phosphatase YbhA
elaB	P0AEH5	-0.152	0.302	0.00414	FALSE	FALSE	0	Protein ElaB
ribC	P0AFU8	-0.151	0.0945	0.438	FALSE	FALSE	0	Riboflavin synthase
trkA	P0AGI8	-0.151	0.321	0.51	FALSE	FALSE	0	Trk system potassium uptake protein TrkA
yciW	P76035	-0.151	0.363	0.201	FALSE	FALSE	0	Uncharacterized protein YciW
frmR	P0AAP3	-0.149	0.227	0.0166	FALSE	FALSE	0	Transcriptional repressor FrmR
yjeI	P0AF70	-0.149	0.056	0.000132	FALSE	FALSE	0	Uncharacterized protein YjeI
cspD	P0A968	-0.148	0.423	0.00503	FALSE	FALSE	0	Cold shock-like protein CspD
yggW	P52062	-0.147	0.597	0.793	FALSE	FALSE	0	Oxygen-independent coproporphyrinogen-III oxidase-like protein YggW
clpB	P63284	-0.146	0.337	0.965	FALSE	FALSE	0	Chaperone protein ClpB
fbp	P0A993	-0.146	0.15	0.302	FALSE	FALSE	0	Fructose-1,6-bisphosphatase class 1
rcsC	P0DMC5	-0.146	0.401	0.241	FALSE	TRUE	1	Sensor histidine kinase RcsC
bamD	P0AC02	-0.145	0.0523	0.0209	FALSE	FALSE	0	Outer membrane protein assembly factor BamD
pncC	P0A6G3	-0.145	0.304	0.969	FALSE	FALSE	0	Nicotinamide-nucleotide amidohydrolase PncC
rarA	P0AAZ4	-0.145	0.117	0.401	FALSE	FALSE	0	Replication-associated recombination protein A
uxuA	P24215	-0.145	0.114	0.21	FALSE	FALSE	0	Mannonate dehydratase
bglX	P33363	-0.144	0.147	0.0155	FALSE	FALSE	0	Periplasmic beta-glucosidase
trmD	P0A873	-0.144	0.81	0.98	FALSE	TRUE	1	tRNA (guanine-N(1)-)-methyltransferase
fkpB	P0AEM0	-0.143	0.239	0.28	FALSE	FALSE	0	FKBP-type 16 kDa peptidyl-prolyl cis-trans isomerase
hemN	P32131	-0.142	0.332	0.226	FALSE	FALSE	0	Oxygen-independent coproporphyrinogen-III oxidase
lldD	P33232	-0.142	0.374	0.0499	FALSE	FALSE	0	L-lactate dehydrogenase
nagB	P0A759	-0.142	0.138	0.596	FALSE	FALSE	0	Glucosamine-6-phosphate deaminase
cyoB	P0ABI8	-0.141	0.343	0.212	FALSE	FALSE	0	Cytochrome bo(3) ubiquinol oxidase subunit 1
grpE	P09372	-0.141	0.0779	0.0164	FALSE	FALSE	0	Protein GrpE
mdoB	P39401	-0.141	0.205	0.000751	FALSE	FALSE	0	Phosphoglycerol transferase I
asmA	P28249	-0.14	0.152	0.365	FALSE	FALSE	0	Protein AsmA
tmk	P0A720	-0.139	0.238	0.716	FALSE	FALSE	0	Thymidylate kinase
yjgM	P39337	-0.139	0.436	0.000669	FALSE	FALSE	0	Uncharacterized N-acetyltransferase YjgM
ilvB	P08142	-0.138	0.176	0.0386	FALSE	FALSE	0	Acetolactate synthase isozyme 1 large subunit
pcnB	P0ABF1	-0.138	0.0932	0.0283	FALSE	FALSE	0	Poly(A) polymerase I
bioH	P13001	-0.136	0.198	0.176	FALSE	FALSE	0	Pimeloyl-[acyl-carrier protein] methyl ester esterase
erpA	P0ACC3	-0.136	0.354	0.358	FALSE	FALSE	0	Iron-sulfur cluster insertion protein ErpA
gadC	P63235	-0.136	0.653	0.487	FALSE	FALSE	0	Probable glutamate/gamma-aminobutyrate antiporter
parC	P0AFI2	-0.136	0.194	0.386	FALSE	FALSE	0	DNA topoisomerase 4 subunit A
frmA	P25437	-0.135	0.284	0.0078	FALSE	FALSE	0	S-(hydroxymethyl)glutathione dehydrogenase
purL	P15254	-0.135	0.121	0.935	FALSE	FALSE	0	Phosphoribosylformylglycinamidine synthase
sucD	P0AGE9	-0.135	0.284	0.866	FALSE	FALSE	0	Succinyl-CoA ligase [ADP-forming] subunit alpha
yihI	P0A8H6	-0.135	0.213	0.000277	FALSE	FALSE	0	Der GTPase-activating protein YihI
trpS	P00954	-0.134	0.153	0.0476	FALSE	FALSE	0	Tryptophan--tRNA ligase
ytfP	P0AE48	-0.134	0.202	0.856	FALSE	FALSE	0	Gamma-glutamylcyclotransferase family protein YtfP
amyA	P26612	-0.133	0.342	0.112	FALSE	FALSE	0	Cytoplasmic alpha-amylase
cyaY	P27838	-0.133	0.243	0.97	FALSE	FALSE	0	Protein CyaY
dapD	P0A9D8	-0.133	0.0712	0.0142	FALSE	FALSE	0	2,3,4,5-tetrahydropyridine-2,6-dicarboxylate N-succinyltransferase
gadA	P69908	-0.133	0.678	0.556	FALSE	FALSE	0	Glutamate decarboxylase alpha
JW5914	P0CE61	-0.133	0.527	0.18	FALSE	FALSE	0	Transposase InsH for insertion sequence element IS5-14;Transposase InsH for insertion sequence element IS5-15;Transposase InsH for insertion sequence element IS5-16;Transposase InsH for insertion sequence element IS5-17;Transposase InsH for insertion sequence element IS5-13;Transposase InsH for insertion sequence element IS5-18;Transposase InsH for insertion sequence element IS5Y;Transposase InsH…
proS	P16659	-0.132	0.124	0.000256	FALSE	FALSE	0	Proline--tRNA ligase
rng	P0A9J0	-0.132	0.153	0.0112	FALSE	FALSE	0	Ribonuclease G
accC	P24182	-0.131	0.218	0.313	FALSE	FALSE	0	Biotin carboxylase
alaA	P0A959	-0.131	0.183	0.00172	FALSE	FALSE	0	Glutamate-pyruvate aminotransferase AlaA
leuB	P30125	-0.131	0.177	0.0426	FALSE	FALSE	0	3-isopropylmalate dehydrogenase
fabB	P0A953	-0.129	0.143	0.156	FALSE	FALSE	0	3-oxoacyl-[acyl-carrier-protein] synthase 1
plsB	P0A7A7	-0.129	0.124	0.324	FALSE	FALSE	0	Glycerol-3-phosphate acyltransferase
clsA	P0A6H8	-0.128	0.22	0.884	FALSE	FALSE	0	Cardiolipin synthase A
glpR	P0ACL0	-0.128	0.301	0.559	FALSE	FALSE	0	Glycerol-3-phosphate regulon repressor
mscM	P39285	-0.128	0.444	0.919	FALSE	FALSE	0	Miniconductance mechanosensitive channel MscM
rsmA	P06992	-0.128	0.133	0.0394	FALSE	FALSE	0	Ribosomal RNA small subunit methyltransferase A
secE	P0AG96	-0.128	0.339	0.572	FALSE	FALSE	0	Protein translocase subunit SecE
crl	P24251	-0.127	0.445	0.00757	FALSE	FALSE	0	Sigma factor-binding protein Crl
msrC	P76270	-0.127	0.238	0.373	FALSE	FALSE	0	Free methionine-R-sulfoxide reductase
yggS	P67080	-0.127	0.074	0.816	FALSE	FALSE	0	UPF0001 protein YggS
yjhC	P39353	-0.127	0.275	0.12	FALSE	FALSE	0	Uncharacterized oxidoreductase YjhC
metE	P25665	-0.126	0.224	0.674	FALSE	FALSE	0	5-methyltetrahydropteroyltriglutamate--homocysteine methyltransferase
nfi	P68739	-0.126	0.192	0.000168	FALSE	FALSE	0	Endonuclease V
pka	P76594	-0.126	0.814	0.126	FALSE	TRUE	7	Protein lysine acetyltransferase Pka
galT	P09148	-0.125	0.352	0.368	FALSE	FALSE	0	Galactose-1-phosphate uridylyltransferase
hsdM	P08957	-0.125	0.225	0.000132	FALSE	FALSE	0	Type I restriction enzyme EcoKI M protein
rpsH	P0A7W7	-0.125	0.149	0.634	FALSE	FALSE	0	30S ribosomal protein S8
speC	P21169	-0.125	0.249	0.000884	FALSE	FALSE	0	Ornithine decarboxylase, constitutive
guaC	P60560	-0.124	0.166	0.274	FALSE	FALSE	0	GMP reductase
metL	P00562	-0.124	0.257	0.883	FALSE	FALSE	0	Bifunctional aspartokinase/homoserine dehydrogenase 2;Aspartokinase;Homoserine dehydrogenase
cysK	P0ABK5	-0.123	0.228	0.634	FALSE	FALSE	0	Cysteine synthase A
baeR	P69228	-0.122	0.212	0.18	FALSE	FALSE	0	Transcriptional regulatory protein BaeR
lpxD	P21645	-0.121	0.197	0.17	FALSE	FALSE	0	UDP-3-O-(3-hydroxymyristoyl)glucosamine N-acyltransferase
cstA	P15078	-0.12	0.361	2.13e-05	FALSE	FALSE	0	Carbon starvation protein A
guaB	P0ADG7	-0.12	0.232	0.0015	FALSE	FALSE	0	Inosine-5-monophosphate dehydrogenase
ilvC	P05793	-0.12	0.136	0.0179	FALSE	FALSE	0	Ketol-acid reductoisomerase
patA	P42588	-0.12	0.855	0.902	FALSE	TRUE	8	Putrescine aminotransferase
paaX	P76086	-0.119	0.541	0.722	FALSE	FALSE	0	Transcriptional repressor PaaX
ygiQ	Q46861	-0.118	0.553	0.136	FALSE	TRUE	3	UPF0313 protein YgiQ
yqjG	P42620	-0.118	0.239	0.414	FALSE	FALSE	0	Glutathionyl-hydroquinone reductase YqjG
sufB	P77522	-0.117	0.528	0.00234	FALSE	FALSE	0	FeS cluster assembly protein SufB
mug	P0A9H1	-0.116	0.364	0.00998	FALSE	FALSE	0	G/U mismatch-specific DNA glycosylase
serC	P23721	-0.115	0.129	0.04	FALSE	FALSE	0	Phosphoserine aminotransferase
sucC	P0A836	-0.115	0.273	0.934	FALSE	FALSE	0	Succinyl-CoA ligase [ADP-forming] subunit beta
cusC	P77211	-0.114	0.881	0.000683	FALSE	TRUE	6	Cation efflux system protein CusC
fabD	P0AAI9	-0.114	0.248	0.258	FALSE	FALSE	0	Malonyl CoA-acyl carrier protein transacylase
lpoA	P45464	-0.114	0.232	0.00358	FALSE	FALSE	0	Penicillin-binding protein activator LpoA
tsaE	P0AF67	-0.113	0.41	0.00759	FALSE	FALSE	0	tRNA threonylcarbamoyladenosine biosynthesis protein TsaE
ydbC	P25906	-0.113	0.323	0.0557	FALSE	FALSE	0	Putative oxidoreductase YdbC
ftnA	P0A998	-0.112	0.22	0.000916	FALSE	FALSE	0	Bacterial non-heme ferritin
ybfA	P0AAU2	-0.112	0.871	0.112	FALSE	TRUE	6	Uncharacterized protein YbfA
yecS	P0AFT2	-0.111	0.259	0.881	FALSE	FALSE	0	Inner membrane amino-acid ABC transporter permease protein YecS
acpP	P0A6A8	-0.11	0.602	0.821	FALSE	FALSE	0	Acyl carrier protein
chbB	P69795	-0.11	0.5	0.0152	FALSE	FALSE	0	N,N-diacetylchitobiose-specific phosphotransferase enzyme IIB component
htpX	P23894	-0.11	0.528	0.57	FALSE	FALSE	0	Protease HtpX
sucB	P0AFG6	-0.11	0.258	0.364	FALSE	FALSE	0	Dihydrolipoyllysine-residue succinyltransferase component of 2-oxoglutarate dehydrogenase complex
wzzB	P76372	-0.11	0.297	0.00485	FALSE	FALSE	0	Chain length determinant protein
yjjG	P0A8Y1	-0.11	0.9	0.527	FALSE	TRUE	10	Pyrimidine 5-nucleotidase YjjG
pitA	P0AFJ7	-0.109	0.281	0.143	FALSE	FALSE	0	Low-affinity inorganic phosphate transporter 1
rimO	P0AEI4	-0.109	0.224	0.052	FALSE	FALSE	0	Ribosomal protein S12 methylthiotransferase RimO
yoaB	P0AEB7	-0.109	0.368	0.317	FALSE	FALSE	0	RutC family protein YoaB
cysG	P0AEA8	-0.108	0.281	0.0637	FALSE	FALSE	0	Siroheme synthase;Uroporphyrinogen-III C-methyltransferase;Precorrin-2 dehydrogenase;Sirohydrochlorin ferrochelatase
ilvI	P00893	-0.108	0.178	0.0525	FALSE	FALSE	0	Acetolactate synthase isozyme 3 large subunit
nfuA	P63020	-0.108	0.558	0.821	FALSE	FALSE	0	Fe/S biogenesis protein NfuA
ptsI	P08839	-0.108	0.234	0.0949	FALSE	FALSE	0	Phosphoenolpyruvate-protein phosphotransferase
acnA	P25516	-0.107	0.178	1.83e-05	FALSE	FALSE	0	Aconitate hydratase A
elbB	P0ABU5	-0.107	0.428	0.0318	FALSE	FALSE	0	Enhancing lycopene biosynthesis protein 2
ygaU	P0ADE6	-0.106	0.435	0.0941	FALSE	FALSE	0	Uncharacterized protein YgaU
yjiM	P39384	-0.106	0.828	0.0888	FALSE	FALSE	0	Uncharacterized protein YjiM
phnB	P16681	-0.105	0.561	0.0523	FALSE	FALSE	0	Protein PhnB
yaiL	P51024	-0.105	0.239	0.184	FALSE	FALSE	0	Uncharacterized protein YaiL
zapD	P36680	-0.105	0.212	0.594	FALSE	FALSE	0	Cell division protein ZapD
rlmI	P75876	-0.104	0.278	0.439	FALSE	FALSE	0	Ribosomal RNA large subunit methyltransferase I
cysS	P21888	-0.103	0.217	0.0799	FALSE	FALSE	0	Cysteine--tRNA ligase
yceD	P0AB28	-0.102	0.406	0.143	FALSE	FALSE	0	Uncharacterized protein YceD
artP	P0AAF6	-0.1	0.332	0.642	FALSE	FALSE	0	Arginine transport ATP-binding protein ArtP
ydiJ	P77748	-0.1	0.27	0.0186	FALSE	FALSE	0	Uncharacterized protein YdiJ
mioC	P03817	-0.0996	0.371	0.707	FALSE	FALSE	0	Protein MioC
mdaB	P0AEY5	-0.0995	0.336	0.0154	FALSE	FALSE	0	Modulator of drug activity B
metF	P0AEZ1	-0.0985	0.361	0.424	FALSE	FALSE	0	5,10-methylenetetrahydrofolate reductase
nlpD	P0ADA3	-0.0985	0.543	0.105	FALSE	FALSE	0	Murein hydrolase activator NlpD
cmoB	P76291	-0.0982	0.504	0.14	FALSE	FALSE	0	tRNA (mo5U34)-methyltransferase
zipA	P77173	-0.0982	0.431	0.156	FALSE	FALSE	0	Cell division protein ZipA
can	P61517	-0.0978	0.453	0.317	FALSE	FALSE	0	Carbonic anhydrase 2
lptE	P0ADC1	-0.0976	0.259	0.0403	FALSE	FALSE	0	LPS-assembly lipoprotein LptE
ispU	P60472	-0.0969	0.868	0.0257	FALSE	TRUE	5	Ditrans,polycis-undecaprenyl-diphosphate synthase ((2E,6E)-farnesyl-diphosphate specific)
dgkA	P0ABN1	-0.0968	0.571	0.0406	FALSE	FALSE	0	Diacylglycerol kinase
murQ	P76535	-0.0959	0.442	0.00982	FALSE	FALSE	0	N-acetylmuramic acid 6-phosphate etherase
plsC	P26647	-0.0951	0.363	0.112	FALSE	FALSE	0	1-acyl-sn-glycerol-3-phosphate acyltransferase
fabA	P0A6Q3	-0.0947	0.287	0.876	FALSE	FALSE	0	3-hydroxydecanoyl-[acyl-carrier-protein] dehydratase
trxB	P0A9P4	-0.0922	0.471	0.212	FALSE	FALSE	0	Thioredoxin reductase
mog	P0AF03	-0.0921	0.522	0.72	FALSE	FALSE	0	Molybdopterin adenylyltransferase
rsmC	P39406	-0.0915	0.284	0.0798	FALSE	FALSE	0	Ribosomal RNA small subunit methyltransferase C
pal	P0A912	-0.0912	0.299	3.32e-05	FALSE	FALSE	0	Peptidoglycan-associated lipoprotein
dnaE	P10443	-0.0911	0.532	0.0424	FALSE	FALSE	0	DNA polymerase III subunit alpha
ftsZ	P0A9A6	-0.0909	0.25	0.194	FALSE	FALSE	0	Cell division protein FtsZ
potG	P31134	-0.0908	0.499	0.000695	FALSE	FALSE	0	Putrescine transport ATP-binding protein PotG
nnr	P31806	-0.0906	0.458	0.329	FALSE	FALSE	0	Bifunctional NAD(P)H-hydrate repair enzyme Nnr;ADP-dependent (S)-NAD(P)H-hydrate dehydratase;NAD(P)H-hydrate epimerase
ychF	P0ABU2	-0.0902	0.261	0.0591	FALSE	FALSE	0	Ribosome-binding ATPase YchF
gabD	P25526	-0.0897	0.361	0.446	FALSE	FALSE	0	Succinate-semialdehyde dehydrogenase [NADP(+)] GabD
lysP	P25737	-0.0894	0.851	0.000277	FALSE	TRUE	3	Lysine-specific permease
yegP	P76402	-0.0893	0.456	0.00302	FALSE	FALSE	0	UPF0339 protein YegP
radA	P24554	-0.0889	0.402	0.332	FALSE	FALSE	0	DNA repair protein RadA
tktA	P27302	-0.0889	0.197	0.0259	FALSE	FALSE	0	Transketolase 1
parE	P20083	-0.0878	0.299	0.598	FALSE	FALSE	0	DNA topoisomerase 4 subunit B
argS	P11875	-0.0875	0.267	0.812	FALSE	FALSE	0	Arginine--tRNA ligase
atpA	P0ABB0	-0.087	0.243	0.0282	FALSE	FALSE	0	ATP synthase subunit alpha
kdsC	P0ABZ4	-0.0863	0.393	0.469	FALSE	FALSE	0	3-deoxy-D-manno-octulosonate 8-phosphate phosphatase KdsC
purM	P08178	-0.086	0.45	0.392	FALSE	FALSE	0	Phosphoribosylformylglycinamidine cyclo-ligase
mreC	P16926	-0.0855	0.358	0.539	FALSE	FALSE	0	Cell shape-determining protein MreC
glmU	P0ACC7	-0.0853	0.205	0.0738	FALSE	FALSE	0	Bifunctional protein GlmU;UDP-N-acetylglucosamine pyrophosphorylase;Glucosamine-1-phosphate N-acetyltransferase
panC	P31663	-0.0853	0.24	0.764	FALSE	FALSE	0	Pantothenate synthetase
ddlB	P07862	-0.0851	0.556	0.209	FALSE	FALSE	0	D-alanine--D-alanine ligase B
dacA	P0AEB2	-0.0843	0.269	0.833	FALSE	FALSE	0	D-alanyl-D-alanine carboxypeptidase DacA
nudE	P45799	-0.0833	0.441	0.131	FALSE	FALSE	0	ADP compounds hydrolase NudE
murD	P14900	-0.0829	0.495	0.0608	FALSE	FALSE	0	UDP-N-acetylmuramoylalanine--D-glutamate ligase
aceA	P0A9G6	-0.0827	0.496	0.0112	FALSE	FALSE	0	Isocitrate lyase
rnc	P0A7Y0	-0.0827	0.317	0.00043	FALSE	FALSE	0	Ribonuclease 3
rplU	P0AG48	-0.0824	0.298	0.13	FALSE	FALSE	0	50S ribosomal protein L21
pheT	P07395	-0.0823	0.304	0.171	FALSE	FALSE	0	Phenylalanine--tRNA ligase beta subunit
lptG	P0ADC6	-0.0819	0.506	0.539	FALSE	FALSE	0	Lipopolysaccharide export system permease protein LptG
nuoF	P31979	-0.0813	0.318	0.811	FALSE	FALSE	0	NADH-quinone oxidoreductase subunit F
rbsD	P04982	-0.081	0.928	0.876	FALSE	TRUE	5	D-ribose pyranase
rfaF	P37692	-0.0807	0.425	0.829	FALSE	FALSE	0	ADP-heptose--LPS heptosyltransferase 2
yidC	P25714	-0.0807	0.478	0.423	FALSE	FALSE	0	Membrane protein insertase YidC
surE	P0A840	-0.0806	0.86	0.0119	FALSE	TRUE	3	5/3-nucleotidase SurE
aroL	P0A6E1	-0.0805	0.423	0.0509	FALSE	FALSE	0	Shikimate kinase 2
crr	P69783	-0.0802	0.373	0.00661	FALSE	FALSE	0	Glucose-specific phosphotransferase enzyme IIA component
aas	P31119	-0.0794	0.575	0.0435	FALSE	FALSE	0	Bifunctional protein Aas;2-acylglycerophosphoethanolamine acyltransferase;Acyl-[acyl-carrier-protein] synthetase
fnr	P0A9E5	-0.0791	0.5	0.886	FALSE	FALSE	0	Fumarate and nitrate reduction regulatory protein
ycfS	P75954	-0.0789	0.851	0.891	FALSE	TRUE	9	Probable L,D-transpeptidase YcfS
alaC	P77434	-0.0787	0.421	0.000168	FALSE	FALSE	0	Glutamate-pyruvate aminotransferase AlaC
prfB	P07012	-0.0783	0.226	0.000577	FALSE	FALSE	0	Peptide chain release factor 2
orn	P0A784	-0.0782	0.454	0.68	FALSE	FALSE	0	Oligoribonuclease
cysE	P0A9D4	-0.0777	0.485	0.584	FALSE	FALSE	0	Serine acetyltransferase
lrhA	P36771	-0.077	0.865	0.0112	FALSE	TRUE	6	Probable HTH-type transcriptional regulator LrhA
cmoA	P76290	-0.077	0.629	0.228	FALSE	FALSE	0	tRNA (cmo5U34)-methyltransferase
guaA	P04079	-0.0767	0.35	0.00172	FALSE	FALSE	0	GMP synthase [glutamine-hydrolyzing]
gnsA	P0AC92	-0.0765	0.57	0.157	FALSE	FALSE	0	Protein GnsA
yafC	P30864	-0.0765	0.666	0.562	FALSE	FALSE	0	Uncharacterized HTH-type transcriptional regulator YafC
lptD	P31554	-0.0762	0.255	0.0508	FALSE	FALSE	0	LPS-assembly protein LptD
yqjD	P64581	-0.0758	0.817	0.299	FALSE	FALSE	0	Uncharacterized protein YqjD
speG	P0A951	-0.0756	0.502	0.698	FALSE	FALSE	0	Spermidine N(1)-acetyltransferase
ompR	P0AA16	-0.0751	0.386	0.081	FALSE	FALSE	0	Transcriptional regulatory protein OmpR
rpe	P0AG07	-0.0747	0.334	0.0646	FALSE	FALSE	0	Ribulose-phosphate 3-epimerase
atpH	P0ABA4	-0.0744	0.286	0.00525	FALSE	FALSE	0	ATP synthase subunit delta
galK	P0A6T3	-0.0742	0.496	0.193	FALSE	FALSE	0	Galactokinase
yibF	P0ACA1	-0.074	0.542	0.0557	FALSE	FALSE	0	Uncharacterized GST-like protein YibF
ppiD	P0ADY1	-0.0739	0.354	0.435	FALSE	FALSE	0	Peptidyl-prolyl cis-trans isomerase D
ybaK	P0AAR3	-0.0728	0.422	0.478	FALSE	FALSE	0	Cys-tRNA(Pro)/Cys-tRNA(Cys) deacylase YbaK
truD	Q57261	-0.0727	0.402	0.701	FALSE	FALSE	0	tRNA pseudouridine synthase D
rbsK	P0A9J6	-0.0725	0.576	0.00455	FALSE	FALSE	0	Ribokinase
atpG	P0ABA6	-0.0721	0.371	0.00952	FALSE	FALSE	0	ATP synthase gamma chain
yihX	P0A8Y3	-0.0721	0.355	0.305	FALSE	FALSE	0	Alpha-D-glucose-1-phosphate phosphatase YihX
yajQ	P0A8E7	-0.0718	0.325	0.625	FALSE	FALSE	0	UPF0234 protein YajQ
yqgE	P0A8W5	-0.0705	0.58	0.207	FALSE	FALSE	0	UPF0301 protein YqgE
rpsC	P0A7V3	-0.0703	0.399	0.345	FALSE	FALSE	0	30S ribosomal protein S3
nlpA	P04846	-0.0698	0.269	3.05e-06	FALSE	FALSE	0	Lipoprotein 28
csdA	Q46925	-0.0693	0.908	0.567	FALSE	TRUE	4	Cysteine desulfurase CsdA
rlmM	P0ADR6	-0.0691	0.57	0.511	FALSE	FALSE	0	Ribosomal RNA large subunit methyltransferase M
ygiB	P0ADT2	-0.0691	0.446	0.0394	FALSE	FALSE	0	UPF0441 protein YgiB
lolA	P61316	-0.069	0.534	0.0161	FALSE	FALSE	0	Outer-membrane lipoprotein carrier protein
azoR	P41407	-0.0689	0.481	0.00226	FALSE	FALSE	0	FMN-dependent NADH-azoreductase
cpxR	P0AE88	-0.0688	0.42	0.00718	FALSE	FALSE	0	Transcriptional regulatory protein CpxR
ibpA	P0C054	-0.0688	0.743	0.966	FALSE	FALSE	0	Small heat shock protein IbpA
metG	P00959	-0.0682	0.34	0.642	FALSE	FALSE	0	Methionine--tRNA ligase
dsbC	P0AEG6	-0.0681	0.391	0.438	FALSE	FALSE	0	Thiol:disulfide interchange protein DsbC
arcA	P0A9Q1	-0.0679	0.397	0.0858	FALSE	FALSE	0	Aerobic respiration control protein ArcA
ybfF	P75736	-0.0674	0.401	0.0593	FALSE	FALSE	0	Esterase YbfF
fdhE	P13024	-0.0673	0.705	0.793	FALSE	FALSE	0	Protein FdhE
dbpA	P21693	-0.0671	0.9	0.316	FALSE	TRUE	9	ATP-dependent RNA helicase DbpA
uspD	P0AAB8	-0.066	0.644	0.994	FALSE	FALSE	0	Universal stress protein D
ispF	P62617	-0.0657	0.637	0.984	FALSE	FALSE	0	2-C-methyl-D-erythritol 2,4-cyclodiphosphate synthase
ftsX	P0AC30	-0.0651	0.62	0.234	FALSE	FALSE	0	Cell division protein FtsX
fhuA	P06971	-0.0649	0.594	0.0029	FALSE	FALSE	0	Ferrichrome-iron receptor
astC	P77581	-0.0648	0.674	0.228	FALSE	FALSE	0	Succinylornithine transaminase
rplN	P0ADY3	-0.0639	0.411	0.0515	FALSE	FALSE	0	50S ribosomal protein L14
chaA	P31801	-0.0637	0.843	0.0682	FALSE	TRUE	8	Sodium/proton antiporter ChaA
mltC	P0C066	-0.0635	0.788	0.793	FALSE	TRUE	1	Membrane-bound lytic murein transglycosylase C
cydC	P23886	-0.0633	0.68	0.979	FALSE	FALSE	0	ATP-binding/permease protein CydC
deoR	P0ACK5	-0.0631	0.66	0.193	FALSE	FALSE	0	Deoxyribose operon repressor
entC	P0AEJ2	-0.0621	0.737	0.0433	FALSE	FALSE	0	Isochorismate synthase EntC
tamB	P39321	-0.0614	0.374	0.000324	FALSE	FALSE	0	Translocation and assembly module TamB
pldA	P0A921	-0.0612	0.374	0.112	FALSE	FALSE	0	Phospholipase A1
nuoN	P0AFF0	-0.061	0.635	0.504	FALSE	FALSE	0	NADH-quinone oxidoreductase subunit N
yeiP	P0A6N8	-0.061	0.526	7.91e-05	FALSE	FALSE	0	Elongation factor P-like protein
prfC	P0A7I4	-0.0609	0.302	0.802	FALSE	FALSE	0	Peptide chain release factor 3
grxD	P0AC69	-0.0607	0.739	0.598	FALSE	FALSE	0	Glutaredoxin-4
metH	P13009	-0.0606	0.475	0.000345	FALSE	FALSE	0	Methionine synthase
rplK	P0A7J7	-0.0604	0.445	0.233	FALSE	FALSE	0	50S ribosomal protein L11
nadR	P27278	-0.0598	0.353	0.0719	FALSE	FALSE	0	Trifunctional NAD biosynthesis/regulator protein NadR;Transcriptional regulator NadR;Nicotinamide mononucleotide adenylyltransferase;Ribosylnicotinamide kinase
rplC	P60438	-0.0592	0.435	0.479	FALSE	FALSE	0	50S ribosomal protein L3
pqiB	P43671	-0.0591	0.485	0.0171	FALSE	FALSE	0	Paraquat-inducible protein B
rseA	P0AFX7	-0.059	0.533	0.131	FALSE	FALSE	0	Anti-sigma-E factor RseA
gnsB	P77695	-0.0589	0.434	4.5e-06	FALSE	FALSE	0	Protein GnsB
minE	P0A734	-0.0588	0.566	0.049	FALSE	FALSE	0	Cell division topological specificity factor
glyA	P0A825	-0.0583	0.455	0.00361	FALSE	FALSE	0	Serine hydroxymethyltransferase
sdhC	P69054	-0.0582	0.756	0.961	FALSE	FALSE	0	Succinate dehydrogenase cytochrome b556 subunit
maeB	P76558	-0.0572	0.532	0.132	FALSE	FALSE	0	NADP-dependent malic enzyme
yqcA	P65367	-0.0564	0.687	0.21	FALSE	FALSE	0	Uncharacterized protein YqcA
yahK	P75691	-0.0562	0.62	0.404	FALSE	FALSE	0	Aldehyde reductase YahK
rpsD	P0A7V8	-0.0547	0.474	0.975	FALSE	FALSE	0	30S ribosomal protein S4
mdoH	P62517	-0.0545	0.399	0.165	FALSE	FALSE	0	Glucans biosynthesis glucosyltransferase H
yjiA	P24203	-0.0544	0.564	0.804	FALSE	FALSE	0	Uncharacterized GTP-binding protein YjiA
flu	P39180	-0.0531	0.812	0.014	FALSE	FALSE	0	Antigen 43;Antigen 43 alpha chain;Antigen 43 beta chain
ompA	P0A910	-0.0528	0.45	0.864	FALSE	FALSE	0	Outer membrane protein A
eda	P0A955	-0.0527	0.478	0.0397	FALSE	FALSE	0	KHG/KDPG aldolase;4-hydroxy-2-oxoglutarate aldolase;2-dehydro-3-deoxy-phosphogluconate aldolase
ybaB	P0A8B5	-0.0524	0.622	0.282	FALSE	FALSE	0	Nucleoid-associated protein YbaB
yhbW	P0ADV5	-0.0522	0.755	0.0248	FALSE	FALSE	0	Uncharacterized protein YhbW
purR	P0ACP7	-0.0518	0.517	0.0205	FALSE	FALSE	0	HTH-type transcriptional repressor PurR
curA	P76113	-0.0517	0.624	0.0336	FALSE	FALSE	0	NADPH-dependent curcumin reductase
rplW	P0ADZ0	-0.0515	0.819	0.37	FALSE	FALSE	0	50S ribosomal protein L23
nuoM	P0AFE8	-0.0513	0.611	0.396	FALSE	FALSE	0	NADH-quinone oxidoreductase subunit M
yajL	Q46948	-0.0508	0.646	0.0876	FALSE	FALSE	0	Probable protein deglycase
acrA	P0AE06	-0.0506	0.532	0.388	FALSE	FALSE	0	Multidrug efflux pump subunit AcrA
yheS	P63389	-0.0505	0.638	0.548	FALSE	FALSE	0	Uncharacterized ABC transporter ATP-binding protein YheS
argG	P0A6E4	-0.0504	0.603	0.44	FALSE	FALSE	0	Argininosuccinate synthase
solA	P40874	-0.0499	0.641	0.0815	FALSE	FALSE	0	N-methyl-L-tryptophan oxidase
entE	P10378	-0.0496	0.804	0.0348	FALSE	FALSE	0	Enterobactin synthase component E
ybgK	P75745	-0.0495	0.694	0.153	FALSE	FALSE	0	Uncharacterized protein YbgK
ycaR	P0AAZ7	-0.0475	0.975	0.491	FALSE	TRUE	2	UPF0434 protein YcaR
mak	P23917	-0.0469	0.639	0.155	FALSE	FALSE	0	Fructokinase
ygiF	P30871	-0.0469	0.591	0.0846	FALSE	FALSE	0	Inorganic triphosphatase
sufC	P77499	-0.0467	0.72	0.0011	FALSE	FALSE	0	Probable ATP-dependent transporter SufC
damX	P11557	-0.0459	0.652	0.00513	FALSE	FALSE	0	Cell division protein DamX
tusE	P0AB18	-0.0457	0.737	0.943	FALSE	FALSE	0	Sulfurtransferase TusE
yceF	P0A729	-0.0457	0.563	0.4	FALSE	FALSE	0	Maf-like protein YceF
ppsA	P23538	-0.0456	0.679	0.00145	FALSE	FALSE	0	Phosphoenolpyruvate synthase
rimL	P13857	-0.0455	0.919	0.935	FALSE	TRUE	3	Ribosomal-protein-serine acetyltransferase
ibaG	P0A9W6	-0.045	0.902	0.196	FALSE	FALSE	0	Acid stress protein IbaG
serA	P0A9T0	-0.0441	0.64	0.662	FALSE	FALSE	0	D-3-phosphoglycerate dehydrogenase
ispE	P62615	-0.0436	0.67	0.272	FALSE	FALSE	0	4-diphosphocytidyl-2-C-methyl-D-erythritol kinase
speB	P60651	-0.0431	0.696	0.017	FALSE	FALSE	0	Agmatinase
ghrB	P37666	-0.0428	0.45	0.00627	FALSE	FALSE	0	Glyoxylate/hydroxypyruvate reductase B
bamC	P0A903	-0.0423	0.625	0.271	FALSE	FALSE	0	Outer membrane protein assembly factor BamC
iclR	P16528	-0.0419	0.945	0.246	FALSE	TRUE	10	Acetate operon repressor
ycjX	P76046	-0.0419	0.8	0.235	FALSE	FALSE	0	Uncharacterized protein YcjX
eptC	P0CB39	-0.0418	0.518	0.000978	FALSE	FALSE	0	Phosphoethanolamine transferase EptC
coaD	P0A6I6	-0.0411	0.716	0.173	FALSE	FALSE	0	Phosphopantetheine adenylyltransferase
dkgA	Q46857	-0.0411	0.707	0.00254	FALSE	FALSE	0	2,5-diketo-D-gluconic acid reductase A
yniC	P77247	-0.041	0.696	0.0171	FALSE	FALSE	0	2-deoxyglucose-6-phosphate phosphatase
ptrA	P05458	-0.0402	0.575	0.765	FALSE	FALSE	0	Protease 3
nuoH	P0AFD4	-0.0392	0.626	0.788	FALSE	FALSE	0	NADH-quinone oxidoreductase subunit H
aceB	P08997	-0.0385	0.784	0.0071	FALSE	FALSE	0	Malate synthase A
fabF	P0AAI5	-0.0384	0.615	0.156	FALSE	FALSE	0	3-oxoacyl-[acyl-carrier-protein] synthase 2
pstB	P0AAH0	-0.0379	0.81	0.175	FALSE	FALSE	0	Phosphate import ATP-binding protein PstB
pckA	P22259	-0.0377	0.681	0.00034	FALSE	FALSE	0	Phosphoenolpyruvate carboxykinase [ATP]
prlC	P27298	-0.0374	0.716	0.0386	FALSE	FALSE	0	Oligopeptidase A
rpoZ	P0A800	-0.0373	0.786	0.658	FALSE	FALSE	0	DNA-directed RNA polymerase subunit omega
dinJ	Q47150	-0.0366	0.78	0.157	FALSE	FALSE	0	Antitoxin DinJ
rnb	P30850	-0.0365	0.609	0.476	FALSE	FALSE	0	Exoribonuclease 2
lolD	P75957	-0.0362	0.704	0.243	FALSE	FALSE	0	Lipoprotein-releasing system ATP-binding protein LolD
glnE	P30870	-0.0361	0.742	0.0407	FALSE	FALSE	0	Glutamate-ammonia-ligase adenylyltransferase
kdsB	P04951	-0.0357	0.719	0.256	FALSE	FALSE	0	3-deoxy-manno-octulosonate cytidylyltransferase
gltA	P0ABH7	-0.0354	0.747	0.261	FALSE	FALSE	0	Citrate synthase
ydhQ	P77552	-0.0354	0.829	0.012	FALSE	FALSE	0	Uncharacterized protein YdhQ
recA	P0A7G6	-0.0353	0.688	0.203	FALSE	FALSE	0	Protein RecA
ybjI	P75809	-0.0348	0.746	0.983	FALSE	FALSE	0	Flavin mononucleotide phosphatase YbjI
tufB	P0CE48	-0.0346	0.55	0.309	FALSE	FALSE	0	Elongation factor Tu 2;Elongation factor Tu 1
secB	P0AG86	-0.0333	0.747	0.377	FALSE	FALSE	0	Protein-export protein SecB
nuoL	P33607	-0.0332	0.767	0.942	FALSE	FALSE	0	NADH-quinone oxidoreductase subunit L
rplO	P02413	-0.0331	0.665	0.17	FALSE	FALSE	0	50S ribosomal protein L15
pyrF	P08244	-0.0327	0.797	0.11	FALSE	FALSE	0	Orotidine 5-phosphate decarboxylase
yibT	Q2M7R5	-0.0326	0.828	0.0102	FALSE	FALSE	0	Uncharacterized protein YibT
aroA	P0A6D3	-0.0325	0.617	0.0511	FALSE	FALSE	0	3-phosphoshikimate 1-carboxyvinyltransferase
epmA	P0A8N7	-0.0324	0.883	0.772	FALSE	TRUE	3	Elongation factor P--(R)-beta-lysine ligase
metC	P06721	-0.0323	0.767	0.584	FALSE	FALSE	0	Cystathionine beta-lyase MetC
valS	P07118	-0.0322	0.667	0.259	FALSE	FALSE	0	Valine--tRNA ligase
purE	P0AG18	-0.0321	0.759	0.218	FALSE	FALSE	0	N5-carboxyaminoimidazole ribonucleotide mutase
miaB	P0AEI1	-0.0308	0.623	0.0247	FALSE	FALSE	0	tRNA-2-methylthio-N(6)-dimethylallyladenosine synthase
mrdA	P0AD65	-0.0306	0.811	0.991	FALSE	FALSE	0	Penicillin-binding protein 2
nei	P50465	-0.0305	0.956	0.377	FALSE	TRUE	9	Endonuclease 8
ybhP	P0AAW1	-0.0305	0.883	0.0888	FALSE	FALSE	0	Uncharacterized protein YbhP
hemE	P29680	-0.0303	0.693	0.426	FALSE	FALSE	0	Uroporphyrinogen decarboxylase
ruvB	P0A812	-0.0298	0.834	0.854	FALSE	FALSE	0	Holliday junction ATP-dependent DNA helicase RuvB
argI	P04391	-0.0297	0.794	9.39e-05	FALSE	FALSE	0	Ornithine carbamoyltransferase chain I
dacC	P08506	-0.0284	0.826	0.388	FALSE	FALSE	0	D-alanyl-D-alanine carboxypeptidase DacC
purB	P0AB89	-0.0281	0.729	0.00658	FALSE	FALSE	0	Adenylosuccinate lyase
dnaN	P0A988	-0.0275	0.755	0.821	FALSE	FALSE	0	DNA polymerase III subunit beta
argB	P0A6C8	-0.0273	0.741	0.214	FALSE	FALSE	0	Acetylglutamate kinase
usg	P08390	-0.0273	0.675	0.0431	FALSE	FALSE	0	USG-1 protein
mdoG	P33136	-0.0269	0.697	0.194	FALSE	FALSE	0	Glucans biosynthesis protein G
mipA	P0A908	-0.0266	0.843	0.00208	FALSE	FALSE	0	MltA-interacting protein
mtlD	P09424	-0.0262	0.712	4.78e-09	FALSE	FALSE	0	Mannitol-1-phosphate 5-dehydrogenase
yedE	P31064	-0.0262	0.783	6.62e-05	FALSE	FALSE	0	UPF0394 inner membrane protein YedE
mrcB	P02919	-0.0261	0.814	0.00264	FALSE	FALSE	0	Penicillin-binding protein 1B;Penicillin-insensitive transglycosylase;Penicillin-sensitive transpeptidase
nfo	P0A6C1	-0.0254	0.831	0.0172	FALSE	FALSE	0	Endonuclease 4
tolC	P02930	-0.0254	0.725	0.519	FALSE	FALSE	0	Outer membrane protein TolC
yraP	P64596	-0.0254	0.759	0.157	FALSE	FALSE	0	Uncharacterized protein YraP
atpD	P0ABB4	-0.0251	0.688	0.0171	FALSE	FALSE	0	ATP synthase subunit beta
rpsJ	P0A7R5	-0.025	0.753	0.15	FALSE	FALSE	0	30S ribosomal protein S10
yejK	P33920	-0.025	0.72	0.0164	FALSE	FALSE	0	Nucleoid-associated protein YejK
nrdF	P37146	-0.0248	0.953	0.00826	FALSE	TRUE	6	Ribonucleoside-diphosphate reductase 2 subunit beta
secG	P0AG99	-0.024	0.872	0.121	FALSE	FALSE	0	Protein-export membrane protein SecG
secY	P0AGA2	-0.0226	0.863	0.161	FALSE	FALSE	0	Protein translocase subunit SecY
pdxY	P77150	-0.0221	0.78	0.000695	FALSE	FALSE	0	Pyridoxamine kinase
nudC	P32664	-0.0214	0.962	0.559	FALSE	TRUE	1	NADH pyrophosphatase
ygjR	P42599	-0.0211	0.978	0.584	FALSE	TRUE	5	Uncharacterized oxidoreductase YgjR
argA	P0A6C5	-0.0204	0.846	0.339	FALSE	FALSE	0	Amino-acid acetyltransferase
lrp	P0ACJ0	-0.0202	0.809	0.04	FALSE	FALSE	0	Leucine-responsive regulatory protein
yniA	P77739	-0.0202	0.823	0.00455	FALSE	FALSE	0	Uncharacterized protein YniA
ypfJ	P64429	-0.02	0.9	0.434	FALSE	FALSE	0	Uncharacterized protein YpfJ
ftsH	P0AAI3	-0.0195	0.805	0.0245	FALSE	FALSE	0	ATP-dependent zinc metalloprotease FtsH
hpf	P0AFX0	-0.0192	0.948	0.447	FALSE	FALSE	0	Ribosome hibernation promoting factor
helD	P15038	-0.0191	0.839	0.371	FALSE	FALSE	0	Helicase IV
ttcA	P76055	-0.0189	0.835	0.419	FALSE	FALSE	0	tRNA 2-thiocytidine biosynthesis protein TtcA
degQ	P39099	-0.0187	0.843	0.256	FALSE	FALSE	0	Periplasmic pH-dependent serine endoprotease DegQ
lpxA	P0A722	-0.0177	0.834	0.0117	FALSE	FALSE	0	Acyl-[acyl-carrier-protein]--UDP-N-acetylglucosamine O-acyltransferase
ybdH	P45579	-0.0173	0.889	0.00344	FALSE	FALSE	0	Uncharacterized oxidoreductase YbdH
lpdA	P0A9P0	-0.0172	0.877	0.00172	FALSE	FALSE	0	Dihydrolipoyl dehydrogenase
gltD	P09832	-0.017	0.81	0.824	FALSE	FALSE	0	Glutamate synthase [NADPH] small chain
yafJ	Q47147	-0.0168	0.968	0.111	FALSE	TRUE	2	Putative glutamine amidotransferase YafJ
rplB	P60422	-0.0167	0.876	0.884	FALSE	FALSE	0	50S ribosomal protein L2
yjaG	P32680	-0.0167	0.803	0.642	FALSE	FALSE	0	Uncharacterized protein YjaG
gshA	P0A6W9	-0.0166	0.846	0.0389	FALSE	FALSE	0	Glutamate--cysteine ligase
yiaF	P0ADK0	-0.0164	0.85	0.000649	FALSE	FALSE	0	Uncharacterized protein YiaF
wecB	P27828	-0.016	0.892	0.717	FALSE	FALSE	0	UDP-N-acetylglucosamine 2-epimerase
tyrA	P07023	-0.0156	0.848	0.975	FALSE	FALSE	0	T-protein;Chorismate mutase;Prephenate dehydrogenase
asnS	P0A8M0	-0.0151	0.872	0.668	FALSE	FALSE	0	Asparagine--tRNA ligase
pdxA	P19624	-0.0143	0.898	0.0293	FALSE	FALSE	0	4-hydroxythreonine-4-phosphate dehydrogenase
astD	P76217	-0.0139	0.928	0.172	FALSE	FALSE	0	N-succinylglutamate 5-semialdehyde dehydrogenase
yehS	P33355	-0.0136	0.917	0.376	FALSE	FALSE	0	Uncharacterized protein YehS
copA	Q59385	-0.0132	0.95	0.527	FALSE	FALSE	0	Copper-exporting P-type ATPase A
rpsG	P02359	-0.0128	0.899	0.284	FALSE	FALSE	0	30S ribosomal protein S7
tesB	P0AGG2	-0.0124	0.896	0.0056	FALSE	FALSE	0	Acyl-CoA thioesterase 2
gsk	P0AEW6	-0.0117	0.915	0.849	FALSE	FALSE	0	Inosine-guanosine kinase
nanR	P0A8W0	-0.0117	0.91	0.401	FALSE	FALSE	0	Transcriptional regulator NanR
leuC	P0A6A6	-0.0115	0.891	0.0202	FALSE	FALSE	0	3-isopropylmalate dehydratase large subunit
recR	P0A7H6	-0.0113	0.929	0.0551	FALSE	FALSE	0	Recombination protein RecR
der	P0A6P5	-0.00964	0.897	0.944	FALSE	FALSE	0	GTPase Der
ymbA	P0AB10	-0.00874	0.945	0.418	FALSE	FALSE	0	Uncharacterized lipoprotein YmbA
ydfG	P39831	-0.00872	0.891	0.876	FALSE	FALSE	0	NADP-dependent 3-hydroxy acid dehydrogenase YdfG
ydiU	P77649	-0.00813	0.976	0.0126	FALSE	TRUE	3	UPF0061 protein YdiU
yciF	P21362	-0.00777	0.968	0.0682	FALSE	FALSE	0	Protein YciF
rplF	P0AG55	-0.00662	0.911	0.619	FALSE	FALSE	0	50S ribosomal protein L6
aroD	P05194	-0.00617	0.964	0.00144	FALSE	FALSE	0	3-dehydroquinate dehydratase
fabH	P0A6R0	-0.00556	0.94	0.31	FALSE	FALSE	0	3-oxoacyl-[acyl-carrier-protein] synthase 3
rfaC	P24173	-0.00523	0.969	0.049	FALSE	FALSE	0	Lipopolysaccharide heptosyltransferase 1
yceG	P28306	-0.00511	0.963	0.842	FALSE	FALSE	0	UPF0755 protein YceG
mprA	P0ACR9	-0.00385	0.973	0.00188	FALSE	FALSE	0	Transcriptional repressor MprA
queD	P65870	-0.00317	0.994	0.000577	FALSE	TRUE	4	6-carboxy-5,6,7,8-tetrahydropterin synthase
hflD	P25746	-0.00261	0.983	0.508	FALSE	FALSE	0	High frequency lysogenization protein HflD
yqhD	Q46856	-0.00215	0.992	0.284	FALSE	FALSE	0	Alcohol dehydrogenase YqhD
dcp	P24171	-0.00178	0.984	0.245	FALSE	FALSE	0	Peptidyl-dipeptidase dcp
rpsE	P0A7W1	-0.00111	0.989	0.211	FALSE	FALSE	0	30S ribosomal protein S5
fre	P0AEN1	-0.000593	0.995	0.657	FALSE	FALSE	0	NAD(P)H-flavin reductase
bcp	P0AE52	-0.000378	0.996	0.0143	FALSE	FALSE	0	Putative peroxiredoxin bcp
dxs	P77488	-0.000174	0.998	0.0204	FALSE	FALSE	0	1-deoxy-D-xylulose-5-phosphate synthase
pyrC	P05020	0.000133	0.999	0.309	FALSE	FALSE	0	Dihydroorotase
qorB	P39315	0.000307	0.999	0.833	FALSE	FALSE	0	Quinone oxidoreductase 2
bamB	P77774	0.000701	0.993	0.809	FALSE	FALSE	0	Outer membrane protein assembly factor BamB
xerD	P0A8P8	0.00078	0.999	0.64	FALSE	TRUE	10	Tyrosine recombinase XerD
barA	P0AEC5	0.00086	0.996	0.885	FALSE	FALSE	0	Signal transduction histidine-protein kinase BarA
trmB	P0A8I5	0.000871	0.995	0.556	FALSE	FALSE	0	tRNA (guanine-N(7)-)-methyltransferase
rplQ	P0AG44	0.00112	0.992	0.692	FALSE	FALSE	0	50S ribosomal protein L17
purC	P0A7D7	0.00185	0.98	0.0289	FALSE	FALSE	0	Phosphoribosylaminoimidazole-succinocarboxamide synthase
aceK	P11071	0.0022	0.997	0.0902	FALSE	TRUE	1	Isocitrate dehydrogenase kinase/phosphatase
accA	P0ABD5	0.00223	0.975	0.0866	FALSE	FALSE	0	Acetyl-coenzyme A carboxylase carboxyl transferase subunit alpha
rfaY	P27240	0.00228	0.997	0.923	FALSE	TRUE	6	Lipopolysaccharide core heptose(II) kinase RfaY
mnmE	P25522	0.00233	0.978	0.502	FALSE	FALSE	0	tRNA modification GTPase MnmE
pncB	P18133	0.00235	0.975	0.519	FALSE	FALSE	0	Nicotinate phosphoribosyltransferase
menI	P77781	0.00257	0.985	0.312	FALSE	FALSE	0	1,4-dihydroxy-2-naphthoyl-CoA hydrolase
ubiD	P0AAB4	0.00317	0.97	0.352	FALSE	FALSE	0	3-octaprenyl-4-hydroxybenzoate carboxy-lyase
malP	P00490	0.00341	0.959	0.473	FALSE	FALSE	0	Maltodextrin phosphorylase
iadA	P39377	0.00454	0.977	0.22	FALSE	FALSE	0	Isoaspartyl dipeptidase
nrdA	P00452	0.00462	0.955	0.0581	FALSE	FALSE	0	Ribonucleoside-diphosphate reductase 1 subunit alpha
sodA	P00448	0.00494	0.97	0.00091	FALSE	FALSE	0	Superoxide dismutase [Mn]
leuD	P30126	0.00509	0.952	0.0328	FALSE	FALSE	0	3-isopropylmalate dehydratase small subunit
yhiN	P37631	0.00596	0.991	0.692	FALSE	TRUE	1	Uncharacterized protein YhiN
ybdL	P77806	0.00601	0.962	0.592	FALSE	FALSE	0	Methionine aminotransferase
nudJ	P0AEI6	0.00612	0.949	0.00199	FALSE	FALSE	0	Phosphatase NudJ
rpsA	P0AG67	0.00639	0.912	0.103	FALSE	FALSE	0	30S ribosomal protein S1
aroH	P00887	0.00664	0.96	0.0325	FALSE	FALSE	0	Phospho-2-dehydro-3-deoxyheptonate aldolase, Trp-sensitive
potB	P0AFK4	0.00672	0.969	0.363	FALSE	FALSE	0	Spermidine/putrescine transport system permease protein PotB
sdhD	P0AC44	0.00786	0.968	0.156	FALSE	FALSE	0	Succinate dehydrogenase hydrophobic membrane anchor subunit
slt	P0AGC3	0.00816	0.93	0.0125	FALSE	FALSE	0	Soluble lytic murein transglycosylase
queF	Q46920	0.0093	0.923	0.245	FALSE	FALSE	0	NADPH-dependent 7-cyano-7-deazaguanine reductase
cusS	P77485	0.00955	0.991	0.518	FALSE	TRUE	10	Sensor kinase CusS
yfiF	P0AGJ5	0.00956	0.892	0.000809	FALSE	FALSE	0	Uncharacterized tRNA/rRNA methyltransferase YfiF
yhjD	P37642	0.00987	0.98	0.0844	FALSE	TRUE	4	Inner membrane protein YhjD
wbbI	P37749	0.0102	0.848	0.12	FALSE	FALSE	0	Beta-1,6-galactofuranosyltransferase WbbI
mntR	P0A9F1	0.0107	0.912	0.404	FALSE	FALSE	0	Transcriptional regulator MntR
trxC	P0AGG4	0.0113	0.955	0.844	FALSE	FALSE	0	Thioredoxin-2
rpoB	P0A8V2	0.0114	0.848	0.0988	FALSE	FALSE	0	DNA-directed RNA polymerase subunit beta
rpoC	P0A8T7	0.0115	0.867	0.142	FALSE	FALSE	0	DNA-directed RNA polymerase subunit beta
aroM	P0AE28	0.0116	0.956	0.0632	FALSE	FALSE	0	Protein AroM
rlmN	P36979	0.0116	0.928	0.0368	FALSE	FALSE	0	Dual-specificity RNA methyltransferase RlmN
pyrG	P0A7E5	0.0121	0.881	0.642	FALSE	FALSE	0	CTP synthase
tam	P76145	0.0133	0.973	0.00164	FALSE	TRUE	3	Trans-aconitate 2-methyltransferase
xthA	P09030	0.0136	0.923	0.25	FALSE	FALSE	0	Exodeoxyribonuclease III
rlmH	P0A8I8	0.0137	0.893	0.0253	FALSE	FALSE	0	Ribosomal RNA large subunit methyltransferase H
rplY	P68919	0.0137	0.812	0.00286	FALSE	FALSE	0	50S ribosomal protein L25
folX	P0AC19	0.0141	0.907	0.194	FALSE	FALSE	0	D-erythro-7,8-dihydroneopterin triphosphate epimerase
alaS	P00957	0.0143	0.856	0.566	FALSE	FALSE	0	Alanine--tRNA ligase
wzzE	P0AG00	0.0151	0.837	0.22	FALSE	FALSE	0	Lipopolysaccharide biosynthesis protein WzzE
anmK	P77570	0.0153	0.948	0.985	FALSE	FALSE	0	Anhydro-N-acetylmuramic acid kinase
topB	P14294	0.0153	0.943	0.0137	FALSE	TRUE	2	DNA topoisomerase 3
rpsI	P0A7X3	0.0155	0.87	0.384	FALSE	FALSE	0	30S ribosomal protein S9
nfsB	P38489	0.0159	0.822	0.00461	FALSE	FALSE	0	Oxygen-insensitive NAD(P)H nitroreductase
csdE	P0AGF2	0.0171	0.86	0.952	FALSE	FALSE	0	Sulfur acceptor protein CsdE
hfq	P0A6X3	0.0174	0.894	0.804	FALSE	FALSE	0	RNA-binding protein Hfq
icd	P08200	0.0176	0.846	0.0769	FALSE	FALSE	0	Isocitrate dehydrogenase [NADP]
pdxK	P40191	0.0185	0.887	0.727	FALSE	FALSE	0	Pyridoxine kinase
ugpQ	P10908	0.0189	0.846	0.711	FALSE	FALSE	0	Glycerophosphoryl diester phosphodiesterase
folD	P24186	0.0195	0.838	0.606	FALSE	FALSE	0	Bifunctional protein FolD;Methylenetetrahydrofolate dehydrogenase;Methenyltetrahydrofolate cyclohydrolase
yacC	P0AA95	0.0206	0.937	0.423	FALSE	FALSE	0	Uncharacterized protein YacC
pgm	P36938	0.0207	0.739	0.0448	FALSE	FALSE	0	Phosphoglucomutase
zapE	P64612	0.0208	0.794	0.0217	FALSE	FALSE	0	Cell division protein ZapE
ahr	P27250	0.0215	0.897	0.935	FALSE	FALSE	0	Aldehyde reductase Ahr
dacB	P24228	0.0215	0.915	0.75	FALSE	FALSE	0	D-alanyl-D-alanine carboxypeptidase DacB
epmB	P39280	0.0217	0.949	0.44	FALSE	TRUE	5	L-lysine 2,3-aminomutase
rplX	P60624	0.0219	0.881	0.264	FALSE	FALSE	0	50S ribosomal protein L24
mukE	P22524	0.0226	0.757	0.345	FALSE	FALSE	0	Chromosome partition protein MukE
napA	P33937	0.0227	0.976	0.0215	FALSE	TRUE	7	Periplasmic nitrate reductase
bamA	P0A940	0.0231	0.686	0.036	FALSE	FALSE	0	Outer membrane protein assembly factor BamA
bisC	P20099	0.0231	0.833	0.714	FALSE	FALSE	0	Biotin sulfoxide reductase
lolE	P75958	0.0232	0.978	0.401	FALSE	TRUE	3	Lipoprotein-releasing system transmembrane protein LolE
tolQ	P0ABU9	0.0233	0.812	0.00166	FALSE	FALSE	0	Protein TolQ
ycaC	P21367	0.024	0.835	0.805	FALSE	FALSE	0	Uncharacterized protein YcaC
dnaA	P03004	0.0241	0.824	0.997	FALSE	FALSE	0	Chromosomal replication initiator protein DnaA
mnmG	P0A6U3	0.0245	0.817	0.804	FALSE	FALSE	0	tRNA uridine 5-carboxymethylaminomethyl modification enzyme MnmG
cysQ	P22255	0.0247	0.791	0.668	FALSE	FALSE	0	3(2),5-bisphosphate nucleotidase CysQ
yebO	P64499	0.0247	0.877	0.576	FALSE	FALSE	0	Uncharacterized protein YebO
yihW	P32144	0.0248	0.941	0.0754	FALSE	TRUE	1	Uncharacterized HTH-type transcriptional regulator YihW
otsA	P31677	0.0249	0.818	1.26e-05	FALSE	FALSE	0	Alpha,alpha-trehalose-phosphate synthase [UDP-forming]
menC	P29208	0.0253	0.981	0.279	FALSE	TRUE	3	o-succinylbenzoate synthase
fabI	P0AEK4	0.0255	0.82	0.036	FALSE	FALSE	0	Enoyl-[acyl-carrier-protein] reductase [NADH] FabI
gcd	P15877	0.0255	0.827	0.000108	FALSE	FALSE	0	Quinoprotein glucose dehydrogenase
ygfZ	P0ADE8	0.0255	0.719	0.000959	FALSE	FALSE	0	tRNA-modifying protein YgfZ
phoQ	P23837	0.0257	0.839	0.682	FALSE	FALSE	0	Sensor protein PhoQ
nrdB	P69924	0.0261	0.767	0.483	FALSE	FALSE	0	Ribonucleoside-diphosphate reductase 1 subunit beta
mltA	P0A935	0.0265	0.928	0.786	FALSE	FALSE	0	Membrane-bound lytic murein transglycosylase A
mmuM	Q47690	0.0268	0.826	0.209	FALSE	FALSE	0	Homocysteine S-methyltransferase
ycdY	P75915	0.0272	0.8	0.299	FALSE	FALSE	0	Chaperone protein YcdY
tas	P0A9T4	0.0276	0.755	0.000434	FALSE	FALSE	0	Protein tas
rpsB	P0A7V0	0.0278	0.673	0.49	FALSE	FALSE	0	30S ribosomal protein S2
cmk	P0A6I0	0.0284	0.788	0.136	FALSE	FALSE	0	Cytidylate kinase
rseB	P0AFX9	0.0284	0.689	0.0682	FALSE	FALSE	0	Sigma-E factor regulatory protein RseB
nhaB	P0AFA7	0.0293	0.808	0.124	FALSE	FALSE	0	Na(+)/H(+) antiporter NhaB
kdsD	P45395	0.0296	0.795	0.475	FALSE	FALSE	0	Arabinose 5-phosphate isomerase KdsD
talB	P0A870	0.0303	0.635	0.00564	FALSE	FALSE	0	Transaldolase B
def	P0A6K3	0.0306	0.681	0.000677	FALSE	FALSE	0	Peptide deformylase
hisS	P60906	0.0315	0.653	0.0386	FALSE	FALSE	0	Histidine--tRNA ligase
surA	P0ABZ6	0.0315	0.658	0.839	FALSE	FALSE	0	Chaperone SurA
pdxJ	P0A794	0.0322	0.766	0.266	FALSE	FALSE	0	Pyridoxine 5-phosphate synthase
rapA	P60240	0.0322	0.755	0.044	FALSE	FALSE	0	RNA polymerase-associated protein RapA
secF	P0AG93	0.0322	0.803	0.707	FALSE	FALSE	0	Protein translocase subunit SecF
alr	P0A6B4	0.0325	0.819	0.126	FALSE	FALSE	0	Alanine racemase, biosynthetic
argH	P11447	0.0327	0.667	0.0121	FALSE	FALSE	0	Argininosuccinate lyase
dcuB	P0ABN9	0.033	0.967	0.0749	FALSE	TRUE	8	Anaerobic C4-dicarboxylate transporter DcuB
dsbD	P36655	0.0333	0.961	0.0131	FALSE	TRUE	2	Thiol:disulfide interchange protein DsbD
yeeN	P0A8A2	0.0337	0.563	0.0266	FALSE	FALSE	0	Probable transcriptional regulatory protein YeeN
ygiC	P0ADT5	0.0337	0.788	0.932	FALSE	FALSE	0	Putative acid--amine ligase YgiC
gabT	P22256	0.0342	0.77	0.392	FALSE	FALSE	0	4-aminobutyrate aminotransferase GabT
fabG	P0AEK2	0.0345	0.605	0.00267	FALSE	FALSE	0	3-oxoacyl-[acyl-carrier-protein] reductase FabG
folA	P0ABQ4	0.0351	0.706	0.00662	FALSE	FALSE	0	Dihydrofolate reductase
dapE	P0AED7	0.0359	0.667	0.707	FALSE	FALSE	0	Succinyl-diaminopimelate desuccinylase
rluF	P32684	0.0371	0.637	9.39e-05	FALSE	FALSE	0	Ribosomal large subunit pseudouridine synthase F
rnt	P30014	0.0372	0.709	0.0434	FALSE	FALSE	0	Ribonuclease T
rplI	P0A7R1	0.0378	0.599	0.0491	FALSE	FALSE	0	50S ribosomal protein L9
ubiF	P75728	0.0385	0.754	0.821	FALSE	FALSE	0	2-octaprenyl-3-methyl-6-methoxy-1,4-benzoquinol hydroxylase
mnmC	P77182	0.0395	0.671	0.000369	FALSE	FALSE	0	tRNA 5-methylaminomethyl-2-thiouridine biosynthesis bifunctional protein MnmC;tRNA (mnm(5)s(2)U34)-methyltransferase;FAD-dependent cmnm(5)s(2)U34 oxidoreductase
mfd	P30958	0.0396	0.621	0.00395	FALSE	FALSE	0	Transcription-repair-coupling factor
seqA	P0AFY8	0.0401	0.632	0.932	FALSE	FALSE	0	Negative modulator of initiation of replication
yiiQ	P32160	0.0402	0.966	0.962	FALSE	TRUE	3	Uncharacterized protein YiiQ
atpC	P0A6E6	0.0403	0.696	0.212	FALSE	FALSE	0	ATP synthase epsilon chain
secD	P0AG90	0.0408	0.5	0.0876	FALSE	FALSE	0	Protein translocase subunit SecD
tatB	P69425	0.0408	0.84	0.707	FALSE	FALSE	0	Sec-independent protein translocase protein TatB
clpX	P0A6H1	0.0409	0.516	0.433	FALSE	FALSE	0	ATP-dependent Clp protease ATP-binding subunit ClpX
rpoA	P0A7Z4	0.0416	0.571	0.367	FALSE	FALSE	0	DNA-directed RNA polymerase subunit alpha
yjdC	P0ACU7	0.042	0.725	0.0557	FALSE	FALSE	0	HTH-type transcriptional regulator YjdC
ppsR	P0A8A4	0.0425	0.782	0.00655	FALSE	FALSE	0	Phosphoenolpyruvate synthase regulatory protein
tolA	P19934	0.0426	0.88	0.311	FALSE	FALSE	0	Protein TolA
lepA	P60785	0.043	0.556	0.599	FALSE	FALSE	0	Elongation factor 4
pheA	P0A9J8	0.0436	0.667	0.0342	FALSE	FALSE	0	P-protein;Chorismate mutase;Prephenate dehydratase
qorA	P28304	0.0439	0.717	0.0767	FALSE	FALSE	0	Quinone oxidoreductase 1
thyA	P0A884	0.0445	0.618	0.00639	FALSE	FALSE	0	Thymidylate synthase
hinT	P0ACE7	0.0449	0.702	0.385	FALSE	FALSE	0	HIT-like protein HinT
ydcI	P77171	0.045	0.791	0.498	FALSE	FALSE	0	Uncharacterized HTH-type transcriptional regulator YdcI
pykF	P0AD61	0.0451	0.599	0.04	FALSE	FALSE	0	Pyruvate kinase I
mraY	P0A6W3	0.0455	0.928	0.876	FALSE	TRUE	4	Phospho-N-acetylmuramoyl-pentapeptide-transferase
prmA	P0A8T1	0.0461	0.568	0.297	FALSE	FALSE	0	Ribosomal protein L11 methyltransferase
yhdE	P25536	0.0462	0.724	0.154	FALSE	FALSE	0	Maf-like protein YhdE
ytfB	P39310	0.0469	0.623	0.567	FALSE	FALSE	0	Uncharacterized protein YtfB
hemB	P0ACB2	0.047	0.537	0.149	FALSE	FALSE	0	Delta-aminolevulinic acid dehydratase
nadA	P11458	0.047	0.598	0.000108	FALSE	FALSE	0	Quinolinate synthase A
yciA	P0A8Z0	0.047	0.782	0.00957	FALSE	TRUE	1	Acyl-CoA thioester hydrolase YciA
ybbO	P0AFP4	0.0471	0.667	0.156	FALSE	FALSE	0	Uncharacterized oxidoreductase YbbO
hslU	P0A6H5	0.0472	0.693	0.764	FALSE	FALSE	0	ATP-dependent protease ATPase subunit HslU
yhbP	P67762	0.0474	0.929	0.0858	FALSE	TRUE	10	UPF0306 protein YhbP
gppA	P25552	0.0478	0.58	0.125	FALSE	FALSE	0	Guanosine-5-triphosphate,3-diphosphate pyrophosphatase
fmt	P23882	0.0485	0.595	0.749	FALSE	FALSE	0	Methionyl-tRNA formyltransferase
glyQ	P00960	0.0492	0.537	0.844	FALSE	FALSE	0	Glycine--tRNA ligase alpha subunit
nusG	P0AFG0	0.0496	0.458	0.412	FALSE	FALSE	0	Transcription termination/antitermination protein NusG
holC	P28905	0.0503	0.933	0.315	FALSE	TRUE	10	DNA polymerase III subunit chi
yecC	P37774	0.0506	0.678	0.805	FALSE	FALSE	0	Uncharacterized amino-acid ABC transporter ATP-binding protein YecC
yfgM	P76576	0.0506	0.549	0.397	FALSE	FALSE	0	UPF0070 protein YfgM
frr	P0A805	0.0509	0.555	0.105	FALSE	FALSE	0	Ribosome-recycling factor
tig	P0A850	0.051	0.401	0.153	FALSE	FALSE	0	Trigger factor
ybfE	P0AAU7	0.0512	0.67	0.842	FALSE	TRUE	1	Uncharacterized protein YbfE
ispA	P22939	0.0513	0.703	0.284	FALSE	FALSE	0	Farnesyl diphosphate synthase
kdgR	P76268	0.0514	0.481	0.00661	FALSE	FALSE	0	Transcriptional regulator KdgR
rraA	P0A8R0	0.052	0.607	0.714	FALSE	FALSE	0	Regulator of ribonuclease activity A
hemG	P0ACB4	0.0521	0.636	0.972	FALSE	FALSE	0	Protoporphyrinogen IX dehydrogenase [menaquinone]
ybiC	P30178	0.0522	0.736	0.103	FALSE	FALSE	0	Uncharacterized oxidoreductase YbiC
hflK	P0ABC7	0.0529	0.5	0.0948	FALSE	FALSE	0	Modulator of FtsH protease HflK
aroE	P15770	0.053	0.672	0.749	FALSE	FALSE	0	Shikimate dehydrogenase (NADP(+))
gmk	P60546	0.053	0.475	0.0131	FALSE	FALSE	0	Guanylate kinase
yebC	P0A8A0	0.0536	0.669	0.531	FALSE	FALSE	0	Probable transcriptional regulatory protein YebC
selB	P14081	0.0539	0.374	0.259	FALSE	FALSE	0	Selenocysteine-specific elongation factor
sseB	P0AFZ1	0.0545	0.69	0.0402	FALSE	FALSE	0	Protein SseB
eno	P0A6P9	0.0551	0.72	0.22	FALSE	FALSE	0	Enolase
carB	P00968	0.0559	0.573	0.00113	FALSE	FALSE	0	Carbamoyl-phosphate synthase large chain
yqfB	P67603	0.056	0.725	0.653	FALSE	FALSE	0	UPF0267 protein YqfB
dnaB	P0ACB0	0.0565	0.44	0.388	FALSE	FALSE	0	Replicative DNA helicase
slyA	P0A8W2	0.0565	0.572	0.842	FALSE	FALSE	0	Transcriptional regulator SlyA
aspC	P00509	0.0566	0.365	0.0498	FALSE	FALSE	0	Aspartate aminotransferase
lasT	P37005	0.0566	0.661	0.38	FALSE	FALSE	0	Uncharacterized tRNA/rRNA methyltransferase LasT
pfkB	P06999	0.0568	0.6	0.00307	FALSE	FALSE	0	ATP-dependent 6-phosphofructokinase isozyme 2
tyrS	P0AGJ9	0.0568	0.52	0.0018	FALSE	FALSE	0	Tyrosine--tRNA ligase
nagD	P0AF24	0.0569	0.533	0.265	FALSE	FALSE	0	Ribonucleotide monophosphatase NagD
yoaF	P64493	0.0571	0.892	0.833	FALSE	TRUE	2	Uncharacterized protein YoaF
ubiB	P0A6A0	0.0573	0.583	0.000234	FALSE	FALSE	0	Probable protein kinase UbiB
minD	P0AEZ3	0.0579	0.432	0.111	FALSE	FALSE	0	Septum site-determining protein MinD
plsX	P27247	0.0579	0.703	0.0171	FALSE	FALSE	0	Phosphate acyltransferase
nrdE	P39452	0.0583	0.91	0.000392	FALSE	TRUE	6	Ribonucleoside-diphosphate reductase 2 subunit alpha
yfeA	P23842	0.0585	0.886	0.204	FALSE	TRUE	9	Uncharacterized protein YfeA
ltaE	P75823	0.0594	0.311	0.000552	FALSE	FALSE	0	Low specificity L-threonine aldolase
fdx	P0A9R4	0.0597	0.575	0.0122	FALSE	FALSE	0	2Fe-2S ferredoxin
gnd	P00350	0.0601	0.338	0.0317	FALSE	FALSE	0	6-phosphogluconate dehydrogenase, decarboxylating
murI	P22634	0.0603	0.645	0.465	FALSE	FALSE	0	Glutamate racemase
hdfR	P0A8R9	0.0607	0.537	2.13e-05	FALSE	FALSE	0	HTH-type transcriptional regulator HdfR
tyrB	P04693	0.0611	0.499	0.000752	FALSE	FALSE	0	Aromatic-amino-acid aminotransferase
ybdK	P77213	0.0614	0.739	0.617	FALSE	FALSE	0	Putative glutamate--cysteine ligase 2
hflC	P0ABC3	0.0616	0.361	0.0166	FALSE	FALSE	0	Modulator of FtsH protease HflC
osmC	P0C0L2	0.0618	0.625	0.000119	FALSE	FALSE	0	Peroxiredoxin OsmC
pgi	P0A6T1	0.0618	0.427	0.166	FALSE	FALSE	0	Glucose-6-phosphate isomerase
prmB	P39199	0.062	0.385	0.896	FALSE	FALSE	0	50S ribosomal protein L3 glutamine methyltransferase
rplD	P60723	0.0621	0.39	0.0136	FALSE	FALSE	0	50S ribosomal protein L4
pth	P0A7D1	0.0623	0.676	0.902	FALSE	FALSE	0	Peptidyl-tRNA hydrolase
ompC	P06996	0.0624	0.346	6.84e-06	FALSE	FALSE	0	Outer membrane protein C
yiiD	P0ADQ2	0.0624	0.377	0.0568	FALSE	FALSE	0	Uncharacterized protein YiiD
yigI	P0ADP2	0.0631	0.713	0.738	FALSE	FALSE	0	Uncharacterized protein YigI
acnB	P36683	0.0639	0.347	0.764	FALSE	FALSE	0	Aconitate hydratase B
deoB	P0A6K6	0.0654	0.553	0.559	FALSE	FALSE	0	Phosphopentomutase
pdxB	P05459	0.0654	0.472	0.451	FALSE	FALSE	0	Erythronate-4-phosphate dehydrogenase
nadC	P30011	0.0656	0.439	0.00137	FALSE	FALSE	0	Nicotinate-nucleotide pyrophosphorylase [carboxylating]
luxS	P45578	0.0659	0.412	0.17	FALSE	FALSE	0	S-ribosylhomocysteine lyase
rplM	P0AA10	0.0659	0.449	0.0539	FALSE	FALSE	0	50S ribosomal protein L13
ispH	P62623	0.0665	0.468	0.516	FALSE	FALSE	0	4-hydroxy-3-methylbut-2-enyl diphosphate reductase
rpoD	P00579	0.0665	0.407	0.0293	FALSE	FALSE	0	RNA polymerase sigma factor RpoD
gltB	P09831	0.0667	0.445	0.967	FALSE	FALSE	0	Glutamate synthase [NADPH] large chain
roxA	P27431	0.0671	0.36	0.00513	FALSE	FALSE	0	50S ribosomal protein L16 arginine hydroxylase
pbpG	P0AFI5	0.0676	0.686	0.00137	FALSE	FALSE	0	D-alanyl-D-alanine endopeptidase
pepA	P68767	0.0678	0.419	0.0715	FALSE	FALSE	0	Cytosol aminopeptidase
fkpA	P45523	0.0682	0.354	0.885	FALSE	FALSE	0	FKBP-type peptidyl-prolyl cis-trans isomerase FkpA
dusA	P32695	0.0686	0.434	0.0634	FALSE	FALSE	0	tRNA-dihydrouridine synthase A
rfaP	P25741	0.0686	0.849	0.491	FALSE	TRUE	6	Lipopolysaccharide core heptose(I) kinase RfaP
rfbB	P37759	0.0687	0.386	0.844	FALSE	FALSE	0	dTDP-glucose 4,6-dehydratase 1
proX	P0AFM2	0.0688	0.897	2.03e-05	FALSE	TRUE	1	Glycine betaine-binding periplasmic protein
yfcF	P77544	0.069	0.7	0.936	FALSE	FALSE	0	Glutathione S-transferase YfcF
rplS	P0A7K6	0.0696	0.384	0.548	FALSE	FALSE	0	50S ribosomal protein L19
livG	P0A9S7	0.0698	0.476	0.101	FALSE	FALSE	0	High-affinity branched-chain amino acid transport ATP-binding protein LivG
leuS	P07813	0.0699	0.352	0.157	FALSE	FALSE	0	Leucine--tRNA ligase
ydhF	P76187	0.0701	0.473	0.0361	FALSE	FALSE	0	Oxidoreductase YdhF
msbA	P60752	0.0706	0.194	0.00389	FALSE	FALSE	0	Lipid A export ATP-binding/permease protein MsbA
hscA	P0A6Z1	0.0708	0.382	0.000709	FALSE	FALSE	0	Chaperone protein HscA
lolB	P61320	0.0711	0.278	0.272	FALSE	FALSE	0	Outer-membrane lipoprotein LolB
wbbK	P37751	0.0721	0.439	0.97	FALSE	FALSE	0	Putative glycosyltransferase WbbK
yfiH	P33644	0.0721	0.667	0.598	FALSE	FALSE	0	Laccase domain protein YfiH
cobB	P75960	0.0726	0.509	0.701	FALSE	FALSE	0	NAD-dependent protein deacylase
ddlA	P0A6J8	0.0727	0.62	0.842	FALSE	FALSE	0	D-alanine--D-alanine ligase A
rssB	P0AEV1	0.0733	0.504	0.46	FALSE	FALSE	0	Regulator of RpoS
yhjK	P37649	0.0733	0.513	0.51	FALSE	FALSE	0	Protein YhjK
rsfS	P0AAT6	0.0739	0.628	0.00045	FALSE	FALSE	0	Ribosomal silencing factor RsfS
proA	P07004	0.0748	0.256	6.52e-05	FALSE	FALSE	0	Gamma-glutamyl phosphate reductase
dsbB	P0A6M2	0.0763	0.58	0.298	FALSE	FALSE	0	Disulfide bond formation protein B
fic	P20605	0.0763	0.864	0.289	FALSE	TRUE	1	Probable adenosine monophosphate-protein transferase fic
gltX	P04805	0.0764	0.361	0.502	FALSE	FALSE	0	Glutamate--tRNA ligase
dld	P06149	0.0768	0.219	0.121	FALSE	FALSE	0	D-lactate dehydrogenase
mrcA	P02918	0.0769	0.418	0.466	FALSE	FALSE	0	Penicillin-binding protein 1A;Penicillin-insensitive transglycosylase;Penicillin-sensitive transpeptidase
nudF	Q93K97	0.0776	0.593	0.312	FALSE	FALSE	0	ADP-ribose pyrophosphatase
trxA	P0AA25	0.0778	0.436	0.902	FALSE	FALSE	0	Thioredoxin-1
rdgC	P36767	0.0786	0.488	0.248	FALSE	FALSE	0	Recombination-associated protein RdgC
ppa	P0A7A9	0.0794	0.265	0.854	FALSE	FALSE	0	Inorganic pyrophosphatase
livM	P22729	0.0797	0.262	0.201	FALSE	FALSE	0	High-affinity branched-chain amino acid transport system permease protein LivM
rplA	P0A7L0	0.08	0.3	0.111	FALSE	FALSE	0	50S ribosomal protein L1
ompX	P0A917	0.0801	0.338	0.000186	FALSE	FALSE	0	Outer membrane protein X
nlpI	P0AFB1	0.0811	0.246	0.201	FALSE	FALSE	0	Lipoprotein NlpI
gor	P06715	0.0815	0.227	0.047	FALSE	FALSE	0	Glutathione reductase
epd	P0A9B6	0.0833	0.385	0.00157	FALSE	FALSE	0	D-erythrose-4-phosphate dehydrogenase
poxB	P07003	0.084	0.355	0.000137	FALSE	FALSE	0	Pyruvate dehydrogenase [ubiquinone];Alpha-peptide
fis	P0A6R3	0.0848	0.673	0.096	FALSE	FALSE	0	DNA-binding protein Fis
era	P06616	0.0849	0.514	0.073	FALSE	FALSE	0	GTPase Era
cspC	P0A9Y6	0.0861	0.441	0.0719	FALSE	FALSE	0	Cold shock-like protein CspC
rplJ	P0A7J3	0.0868	0.478	0.291	FALSE	FALSE	0	50S ribosomal protein L10
nagZ	P75949	0.0874	0.342	0.297	FALSE	FALSE	0	Beta-hexosaminidase
ydcP	P76104	0.0886	0.249	0.00345	FALSE	FALSE	0	Uncharacterized protease YdcP
rsmH	P60390	0.0887	0.337	0.1	FALSE	FALSE	0	Ribosomal RNA small subunit methyltransferase H
rcsF	P69411	0.0892	0.343	0.015	FALSE	FALSE	0	Outer membrane lipoprotein RcsF
lpxC	P0A725	0.0895	0.523	0.255	FALSE	FALSE	0	UDP-3-O-[3-hydroxymyristoyl] N-acetylglucosamine deacetylase
yejM	P0AD27	0.0899	0.406	0.907	FALSE	FALSE	0	Inner membrane protein YejM
betB	P17445	0.0909	0.836	0.000704	FALSE	FALSE	0	NAD/NADP-dependent betaine aldehyde dehydrogenase
smpB	P0A832	0.0913	0.273	0.322	FALSE	FALSE	0	SsrA-binding protein
tsaD	P05852	0.0915	0.532	0.0449	FALSE	FALSE	0	tRNA N6-adenosine threonylcarbamoyltransferase
nuoG	P33602	0.0931	0.21	0.186	FALSE	FALSE	0	NADH-quinone oxidoreductase subunit G
ftsE	P0A9R7	0.0934	0.195	0.1	FALSE	FALSE	0	Cell division ATP-binding protein FtsE
ybeZ	P0A9K3	0.0936	0.313	0.00238	FALSE	FALSE	0	PhoH-like protein
dadX	P29012	0.0937	0.44	0.15	FALSE	FALSE	0	Alanine racemase, catabolic
uvrC	P0A8G0	0.0944	0.311	0.0135	FALSE	FALSE	0	UvrABC system protein C
truB	P60340	0.0946	0.309	0.000732	FALSE	FALSE	0	tRNA pseudouridine synthase B
purN	P08179	0.095	0.414	0.166	FALSE	FALSE	0	Phosphoribosylglycinamide formyltransferase
ybbN	P77395	0.0952	0.45	0.212	FALSE	FALSE	0	Uncharacterized protein YbbN
ahpC	P0AE08	0.0956	0.248	0.136	FALSE	FALSE	0	Alkyl hydroperoxide reductase subunit C
yedD	P31063	0.0961	0.46	0.159	FALSE	FALSE	0	Uncharacterized lipoprotein YedD
murG	P17443	0.0964	0.505	0.265	FALSE	FALSE	0	UDP-N-acetylglucosamine--N-acetylmuramyl-(pentapeptide) pyrophosphoryl-undecaprenol N-acetylglucosamine transferase
ybhG	P75777	0.0964	0.574	0.258	FALSE	FALSE	0	UPF0194 membrane protein YbhG
topA	P06612	0.0972	0.166	0.00245	FALSE	FALSE	0	DNA topoisomerase 1
ilvN	P0ADF8	0.0973	0.265	0.000577	FALSE	FALSE	0	Acetolactate synthase isozyme 1 small subunit
rluD	P33643	0.0977	0.408	0.392	FALSE	FALSE	0	Ribosomal large subunit pseudouridine synthase D
mlaF	P63386	0.0994	0.344	0.824	FALSE	FALSE	0	Probable phospholipid import ATP-binding protein MlaF
rpsM	P0A7S9	0.101	0.265	0.096	FALSE	FALSE	0	30S ribosomal protein S13
ybjX	P75829	0.101	0.448	0.489	FALSE	FALSE	0	Uncharacterized protein YbjX
yghU	Q46845	0.101	0.25	0.00104	FALSE	FALSE	0	Disulfide-bond oxidoreductase YghU
yjjU	P39407	0.103	0.791	0.00595	FALSE	TRUE	6	Uncharacterized protein YjjU
yccU	P75874	0.103	0.217	0.0121	FALSE	FALSE	0	Uncharacterized protein YccU
yiiM	P32157	0.103	0.237	0.0329	FALSE	FALSE	0	Protein YiiM
cobS	P36561	0.104	0.862	0.000323	FALSE	TRUE	6	Adenosylcobinamide-GDP ribazoletransferase
dksA	P0ABS1	0.104	0.194	0.633	FALSE	FALSE	0	RNA polymerase-binding transcription factor DksA
tsaB	P76256	0.104	0.299	0.0403	FALSE	FALSE	0	tRNA threonylcarbamoyladenosine biosynthesis protein TsaB
amn	P0AE12	0.105	0.454	0.832	FALSE	FALSE	0	AMP nucleosidase
proB	P0A7B5	0.105	0.201	8.72e-05	FALSE	FALSE	0	Glutamate 5-kinase
ybjQ	P0A8C1	0.105	0.301	0.519	FALSE	FALSE	0	UPF0145 protein YbjQ
asnC	P0ACI6	0.106	0.461	0.821	FALSE	FALSE	0	Regulatory protein AsnC
ptrB	P24555	0.106	0.846	0.379	FALSE	TRUE	5	Protease 2
cedA	P0AE60	0.107	0.672	0.201	FALSE	TRUE	1	Cell division activator CedA
hldD	P67910	0.108	0.133	0.0424	FALSE	FALSE	0	ADP-L-glycero-D-manno-heptose-6-epimerase
murF	P11880	0.108	0.348	0.176	FALSE	FALSE	0	UDP-N-acetylmuramoyl-tripeptide--D-alanyl-D-alanine ligase
rlmL	P75864	0.108	0.146	0.017	FALSE	FALSE	0	Ribosomal RNA large subunit methyltransferase K/L;23S rRNA m2G2445 methyltransferase;23S rRNA m7G2069 methyltransferase
yqjK	Q47710	0.108	0.568	0.00449	FALSE	FALSE	0	Uncharacterized protein YqjK
eutM	P0ABF4	0.109	0.833	0.66	FALSE	TRUE	7	Ethanolamine utilization protein EutM
sseA	P31142	0.109	0.185	0.134	FALSE	FALSE	0	3-mercaptopyruvate sulfurtransferase
tamA	P0ADE4	0.109	0.465	0.0056	FALSE	FALSE	0	Translocation and assembly module TamA
livF	P22731	0.11	0.211	0.0919	FALSE	FALSE	0	High-affinity branched-chain amino acid transport ATP-binding protein LivF
lon	P0A9M0	0.11	0.284	0.0403	FALSE	FALSE	0	Lon protease
ydbK	P52647	0.11	0.248	9.43e-05	FALSE	FALSE	0	Probable pyruvate-flavodoxin oxidoreductase
yhhW	P46852	0.11	0.444	0.127	FALSE	FALSE	0	Quercetin 2,3-dioxygenase
pdxH	P0AFI7	0.111	0.143	0.018	FALSE	FALSE	0	Pyridoxine/pyridoxamine 5-phosphate oxidase
rmlA1	P37744	0.111	0.0979	0.983	FALSE	FALSE	0	Glucose-1-phosphate thymidylyltransferase 1
yfbT	P77625	0.111	0.496	0.849	FALSE	FALSE	0	Sugar phosphatase YfbT
dapB	P04036	0.113	0.288	0.0142	FALSE	FALSE	0	4-hydroxy-tetrahydrodipicolinate reductase
ftsA	P0ABH0	0.113	0.482	0.53	FALSE	FALSE	0	Cell division protein FtsA
yeaP	P76245	0.113	0.683	0.0858	FALSE	TRUE	1	Probable diguanylate cyclase YeaP
ileS	P00956	0.114	0.0757	0.155	FALSE	FALSE	0	Isoleucine--tRNA ligase
potA	P69874	0.114	0.12	0.192	FALSE	FALSE	0	Spermidine/putrescine import ATP-binding protein PotA
maeA	P26616	0.115	0.11	0.0361	FALSE	FALSE	0	NAD-dependent malic enzyme
hrpA	P43329	0.116	0.154	0.00414	FALSE	FALSE	0	ATP-dependent RNA helicase HrpA
murB	P08373	0.116	0.122	0.0287	FALSE	FALSE	0	UDP-N-acetylenolpyruvoylglucosamine reductase
queC	P77756	0.116	0.282	0.0876	FALSE	FALSE	0	7-cyano-7-deazaguanine synthase
tsf	P0A6P1	0.116	0.14	0.00396	FALSE	FALSE	0	Elongation factor Ts
agaR	P0ACK2	0.117	0.607	0.404	FALSE	FALSE	0	Putative aga operon transcriptional repressor
gapA	P0A9B2	0.117	0.358	0.606	FALSE	FALSE	0	Glyceraldehyde-3-phosphate dehydrogenase A
polA	P00582	0.117	0.21	0.993	FALSE	FALSE	0	DNA polymerase I
galF	P0AAB6	0.118	0.199	0.413	FALSE	FALSE	0	UTP--glucose-1-phosphate uridylyltransferase
rihA	P41409	0.118	0.212	0.621	FALSE	FALSE	0	Pyrimidine-specific ribonucleoside hydrolase RihA
rplE	P62399	0.118	0.133	0.0402	FALSE	FALSE	0	50S ribosomal protein L5
ffh	P0AGD7	0.119	0.113	0.0285	FALSE	FALSE	0	Signal recognition particle protein
yebT	P76272	0.119	0.369	0.236	FALSE	FALSE	0	Uncharacterized protein YebT
yigB	P0ADP0	0.119	0.331	0.0406	FALSE	FALSE	0	Flavin mononucleotide phosphatase YigB
fsaA	P78055	0.12	0.375	0.875	FALSE	FALSE	0	Fructose-6-phosphate aldolase 1
cusA	P38054	0.121	0.917	0.14	FALSE	TRUE	7	Cation efflux system protein CusA
sthA	P27306	0.122	0.371	0.12	FALSE	FALSE	0	Soluble pyridine nucleotide transhydrogenase
ahpF	P35340	0.123	0.0636	0.0839	FALSE	FALSE	0	Alkyl hydroperoxide reductase subunit F
rpmG	P0A7N9	0.123	0.585	0.978	FALSE	FALSE	0	50S ribosomal protein L33
uxuR	P39161	0.123	0.821	0.113	FALSE	TRUE	3	Uxu operon transcriptional regulator
yciO	P0AFR4	0.123	0.105	7.91e-05	FALSE	FALSE	0	Uncharacterized protein YciO
yohF	P33368	0.123	0.342	0.00513	FALSE	FALSE	0	Uncharacterized oxidoreductase YohF
glyS	P00961	0.124	0.117	0.747	FALSE	FALSE	0	Glycine--tRNA ligase beta subunit
psd	P0A8K1	0.124	0.132	0.0497	FALSE	FALSE	0	Phosphatidylserine decarboxylase proenzyme;Phosphatidylserine decarboxylase alpha chain;Phosphatidylserine decarboxylase beta chain
betA	P17444	0.125	0.601	2.13e-05	FALSE	TRUE	6	Oxygen-dependent choline dehydrogenase
cra	P0ACP1	0.125	0.467	0.0293	FALSE	FALSE	0	Catabolite repressor/activator
mutS	P23909	0.125	0.327	0.0994	FALSE	FALSE	0	DNA mismatch repair protein MutS
pheS	P08312	0.125	0.156	0.0416	FALSE	FALSE	0	Phenylalanine--tRNA ligase alpha subunit
rcsB	P0DMC7	0.125	0.287	0.944	FALSE	FALSE	0	Transcriptional regulatory protein RcsB
ssb	P0AGE0	0.125	0.122	0.548	FALSE	FALSE	0	Single-stranded DNA-binding protein
ribA	P0A7I7	0.126	0.172	0.257	FALSE	FALSE	0	GTP cyclohydrolase-2
carA	P0A6F1	0.127	0.186	0.00164	FALSE	FALSE	0	Carbamoyl-phosphate synthase small chain
ihfA	P0A6X7	0.127	0.258	0.37	FALSE	FALSE	0	Integration host factor subunit alpha
pmbA	P0AFK0	0.127	0.0924	0.0672	FALSE	FALSE	0	Metalloprotease PmbA
speA	P21170	0.127	0.22	0.00043	FALSE	FALSE	0	Biosynthetic arginine decarboxylase
tgt	P0A847	0.127	0.375	0.802	FALSE	FALSE	0	Queuine tRNA-ribosyltransferase
hemL	P23893	0.128	0.171	0.572	FALSE	FALSE	0	Glutamate-1-semialdehyde 2,1-aminomutase
otsB	P31678	0.129	0.72	0.000502	FALSE	TRUE	1	Trehalose-6-phosphate phosphatase
yqjE	P64585	0.129	0.371	0.00314	FALSE	FALSE	0	Inner membrane protein YqjE
gcvH	P0A6T9	0.13	0.82	0.00385	FALSE	TRUE	6	Glycine cleavage system H protein
fldB	P0ABY4	0.13	0.409	0.64	FALSE	FALSE	0	Flavodoxin-2
ybdG	P0AAT4	0.13	0.555	0.0019	FALSE	FALSE	0	Miniconductance mechanosensitive channel YbdG
exbB	P0ABU7	0.131	0.494	0.00412	FALSE	FALSE	0	Biopolymer transport protein ExbB
gpmB	P0A7A2	0.131	0.292	0.345	FALSE	FALSE	0	Probable phosphoglycerate mutase GpmB
ligA	P15042	0.131	0.229	0.908	FALSE	FALSE	0	DNA ligase
talA	P0A867	0.131	0.261	0.000188	FALSE	FALSE	0	Transaldolase A
ycaO	P75838	0.131	0.149	0.0209	FALSE	FALSE	0	Ribosomal protein S12 methylthiotransferase accessory factor YcaO
ydgJ	P77376	0.131	0.5	0.416	FALSE	FALSE	0	Uncharacterized oxidoreductase YdgJ
cysB	P0A9F3	0.133	0.136	0.562	FALSE	FALSE	0	HTH-type transcriptional regulator CysB
dedD	P09549	0.133	0.484	0.565	FALSE	FALSE	0	Cell division protein DedD
entB	P0ADI4	0.133	0.496	0.0184	FALSE	FALSE	0	Enterobactin synthase component B;Isochorismatase;Aryl carrier protein
fldA	P61949	0.133	0.117	0.00643	FALSE	FALSE	0	Flavodoxin-1
lapB	P0AB58	0.133	0.612	0.92	FALSE	FALSE	0	Lipopolysaccharide assembly protein B
yafV	Q47679	0.133	0.326	0.376	FALSE	FALSE	0	Hydrolase YafV
yibQ	P37691	0.133	0.8	0.284	FALSE	TRUE	9	Uncharacterized protein YibQ
ldcA	P76008	0.135	0.288	0.0261	FALSE	FALSE	0	Murein tetrapeptide carboxypeptidase
map	P0AE18	0.136	0.106	0.189	FALSE	FALSE	0	Methionine aminopeptidase
rhlB	P0A8J8	0.136	0.0524	0.000972	FALSE	FALSE	0	ATP-dependent RNA helicase RhlB
ihfB	P0A6Y1	0.137	0.202	0.875	FALSE	FALSE	0	Integration host factor subunit beta
osmE	P0ADB1	0.137	0.508	0.00211	FALSE	FALSE	0	Osmotically-inducible lipoprotein E
coaBC	P0ABQ0	0.138	0.341	0.932	FALSE	FALSE	0	Coenzyme A biosynthesis bifunctional protein CoaBC;Phosphopantothenoylcysteine decarboxylase;Phosphopantothenate--cysteine ligase
mpl	P37773	0.138	0.146	0.598	FALSE	FALSE	0	UDP-N-acetylmuramate--L-alanyl-gamma-D-glutamyl-meso-2,6-diaminoheptandioate ligase
gcvP	P33195	0.139	0.198	0.394	FALSE	FALSE	0	Glycine dehydrogenase (decarboxylating)
gmhA	P63224	0.139	0.128	0.0616	FALSE	FALSE	0	Phosphoheptose isomerase
murE	P22188	0.14	0.371	0.401	FALSE	FALSE	0	UDP-N-acetylmuramoyl-L-alanyl-D-glutamate--2,6-diaminopimelate ligase
yddE	P37757	0.14	0.45	0.302	FALSE	FALSE	0	Uncharacterized isomerase YddE
narP	P31802	0.141	0.164	0.000262	FALSE	FALSE	0	Nitrate/nitrite response regulator protein NarP
frsA	P04335	0.142	0.222	0.572	FALSE	FALSE	0	Esterase FrsA
hflX	P25519	0.142	0.142	0.0973	FALSE	FALSE	0	GTPase HflX
msrA	P0A744	0.142	0.15	0.553	FALSE	FALSE	0	Peptide methionine sulfoxide reductase MsrA
rlmD	P55135	0.142	0.683	0.819	FALSE	TRUE	1	23S rRNA (uracil(1939)-C(5))-methyltransferase RlmD
secA	P10408	0.142	0.0947	0.25	FALSE	FALSE	0	Protein translocase subunit SecA
dapA	P0A6L2	0.143	0.147	0.121	FALSE	FALSE	0	4-hydroxy-tetrahydrodipicolinate synthase
nuoI	P0AFD6	0.143	0.151	0.353	FALSE	FALSE	0	NADH-quinone oxidoreductase subunit I
speD	P0A7F6	0.144	0.253	0.00308	FALSE	FALSE	0	S-adenosylmethionine decarboxylase proenzyme;S-adenosylmethionine decarboxylase beta chain;S-adenosylmethionine decarboxylase alpha chain
thiI	P77718	0.145	0.0923	0.0579	FALSE	FALSE	0	tRNA sulfurtransferase
srmB	P21507	0.146	0.0841	0.014	FALSE	FALSE	0	ATP-dependent RNA helicase SrmB
uvrB	P0A8F8	0.146	0.207	0.48	FALSE	FALSE	0	UvrABC system protein B
yfhM	P76578	0.146	0.118	0.0056	FALSE	FALSE	0	Uncharacterized lipoprotein YfhM
bcr	P28246	0.147	0.611	0.963	FALSE	TRUE	6	Bicyclomycin resistance protein
yrbL	P64610	0.147	0.752	0.079	FALSE	TRUE	6	Uncharacterized protein YrbL
argP	P0A8S1	0.148	0.123	0.0168	FALSE	FALSE	0	HTH-type transcriptional regulator ArgP
gstB	P0ACA7	0.148	0.0229	0.000135	FALSE	FALSE	0	Glutathione S-transferase GstB
hemX	P09127	0.148	0.123	0.1	FALSE	FALSE	0	Putative uroporphyrinogen-III C-methyltransferase
gcvT	P27248	0.149	0.0537	0.465	FALSE	FALSE	0	Aminomethyltransferase
nrdR	P0A8D0	0.149	0.304	0.856	FALSE	FALSE	0	Transcriptional repressor NrdR
trmJ	P0AE01	0.149	0.116	0.0264	FALSE	FALSE	0	tRNA (cytidine/uridine-2-O-)-methyltransferase TrmJ
codA	P25524	0.15	0.0959	0.0713	FALSE	FALSE	0	Cytosine deaminase
manZ	P69805	0.15	0.452	0.00144	FALSE	FALSE	0	Mannose permease IID component
basS	P30844	0.151	0.802	0.884	FALSE	TRUE	9	Sensor protein BasS
gpr	Q46851	0.151	0.172	0.337	FALSE	FALSE	0	L-glyceraldehyde 3-phosphate reductase
ispG	P62620	0.151	0.0455	0.101	FALSE	FALSE	0	4-hydroxy-3-methylbut-2-en-1-yl diphosphate synthase (flavodoxin)
kdgK	P37647	0.152	0.182	0.991	FALSE	FALSE	0	2-dehydro-3-deoxygluconokinase
yjfP	P39298	0.153	0.265	0.0218	FALSE	FALSE	0	Esterase YjfP
tsaC	P45748	0.154	0.167	0.478	FALSE	FALSE	0	Threonylcarbamoyl-AMP synthase
ampD	P13016	0.155	0.862	0.816	FALSE	TRUE	4	1,6-anhydro-N-acetylmuramyl-L-alanine amidase AmpD
fucO	P0A9S1	0.155	0.808	0.209	FALSE	TRUE	6	Lactaldehyde reductase
lysC	P08660	0.155	0.412	0.0953	FALSE	FALSE	0	Lysine-sensitive aspartokinase 3
lhgO	P37339	0.156	0.617	0.64	FALSE	TRUE	6	L-2-hydroxyglutarate oxidase LhgO
slyD	P0A9K9	0.156	0.223	0.379	FALSE	FALSE	0	FKBP-type peptidyl-prolyl cis-trans isomerase SlyD
yegQ	P76403	0.156	0.106	0.00321	FALSE	FALSE	0	Uncharacterized protease YegQ
aldB	P37685	0.157	0.0666	0.0188	FALSE	FALSE	0	Aldehyde dehydrogenase B
glnD	P27249	0.157	0.146	0.00141	FALSE	FALSE	0	Bifunctional uridylyltransferase/uridylyl-removing enzyme;[Protein-PII] uridylyltransferase;[Protein-PII]-UMP uridylyl-removing enzyme
ycjF	P0A8R7	0.157	0.268	0.882	FALSE	FALSE	0	UPF0283 membrane protein YcjF
rspR	P0ACM2	0.158	0.727	0.363	FALSE	TRUE	9	HTH-type transcriptional repressor RspR
sodB	P0AGD3	0.159	0.0992	0.00255	FALSE	FALSE	0	Superoxide dismutase [Fe]
yajC	P0ADZ7	0.159	0.0864	0.0264	FALSE	FALSE	0	UPF0092 membrane protein YajC
yqcC	Q46919	0.159	0.302	0.0699	FALSE	FALSE	0	Uncharacterized protein YqcC
cca	P06961	0.16	0.134	0.112	FALSE	FALSE	0	Multifunctional CCA protein;CCA-adding enzyme;2-nucleotidase;2,3-cyclic phosphodiesterase;Phosphatase
cutC	P67826	0.16	0.0495	0.495	FALSE	FALSE	0	Copper homeostasis protein CutC
efp	P0A6N4	0.16	0.247	0.491	FALSE	FALSE	0	Elongation factor P
glgB	P07762	0.16	0.0809	0.00128	FALSE	FALSE	0	1,4-alpha-glucan branching enzyme GlgB
pssA	P23830	0.16	0.105	0.0473	FALSE	FALSE	0	CDP-diacylglycerol--serine O-phosphatidyltransferase
hemC	P06983	0.161	0.0757	0.0199	FALSE	FALSE	0	Porphobilinogen deaminase
mhpR	P77569	0.161	0.759	0.663	FALSE	TRUE	1	Mhp operon transcriptional activator
rcsD	P39838	0.161	0.074	0.0149	FALSE	FALSE	0	Phosphotransferase RcsD
nagA	P0AF18	0.163	0.304	0.203	FALSE	FALSE	0	N-acetylglucosamine-6-phosphate deacetylase
rstA	P52108	0.164	0.1	0.00388	FALSE	FALSE	0	Transcriptional regulatory protein RstA
dppB	P0AEF8	0.165	0.147	0.654	FALSE	FALSE	0	Dipeptide transport system permease protein DppB
mukB	P22523	0.166	0.0308	0.562	FALSE	FALSE	0	Chromosome partition protein MukB
ydgA	P77804	0.166	0.0505	0.00157	FALSE	FALSE	0	Protein YdgA
gloA	P0AC81	0.167	0.124	0.0182	FALSE	FALSE	0	Lactoylglutathione lyase
mlaD	P64604	0.168	0.0332	0.75	FALSE	FALSE	0	Probable phospholipid ABC transporter-binding protein MlaD
mukF	P60293	0.168	0.0723	0.581	FALSE	FALSE	0	Chromosome partition protein MukF
nfsA	P17117	0.168	0.209	0.000543	FALSE	FALSE	0	Oxygen-insensitive NADPH nitroreductase
exuR	P0ACL2	0.169	0.236	0.138	FALSE	FALSE	0	Exu regulon transcriptional regulator
ybjT	P75822	0.17	0.815	0.816	FALSE	TRUE	9	Uncharacterized protein YbjT
nudK	P37128	0.172	0.186	0.0611	FALSE	FALSE	0	GDP-mannose pyrophosphatase NudK
zwf	P0AC53	0.172	0.0251	0.0402	FALSE	FALSE	0	Glucose-6-phosphate 1-dehydrogenase;Extracellular death factor
bfr	P0ABD3	0.173	0.203	0.229	FALSE	FALSE	0	Bacterioferritin
kdsA	P0A715	0.173	0.0938	0.571	FALSE	FALSE	0	2-dehydro-3-deoxyphosphooctonate aldolase
manA	P00946	0.173	0.0508	0.205	FALSE	FALSE	0	Mannose-6-phosphate isomerase
rplP	P0ADY7	0.173	0.234	0.587	FALSE	FALSE	0	50S ribosomal protein L16
rfaG	P25740	0.174	0.819	0.537	FALSE	TRUE	7	Lipopolysaccharide core biosynthesis protein RfaG
csgD	P52106	0.175	0.617	0.00789	FALSE	TRUE	6	CsgBAC operon transcriptional regulatory protein
ldhA	P52643	0.175	0.0947	0.156	FALSE	FALSE	0	D-lactate dehydrogenase
rluC	P0AA39	0.175	0.354	0.259	FALSE	FALSE	0	Ribosomal large subunit pseudouridine synthase C
rffA	P27833	0.176	0.0805	0.983	FALSE	FALSE	0	dTDP-4-amino-4,6-dideoxygalactose transaminase
uup	P43672	0.176	0.0823	0.00453	FALSE	FALSE	0	ABC transporter ATP-binding protein uup
dxr	P45568	0.177	0.279	0.59	FALSE	FALSE	0	1-deoxy-D-xylulose 5-phosphate reductoisomerase
kbl	P0AB77	0.177	0.154	0.0945	FALSE	FALSE	0	2-amino-3-ketobutyrate coenzyme A ligase
thrC	P00934	0.178	0.0855	0.258	FALSE	FALSE	0	Threonine synthase
ppc	P00864	0.18	0.192	0.45	FALSE	FALSE	0	Phosphoenolpyruvate carboxylase
rdgB	P52061	0.18	0.29	0.267	FALSE	FALSE	0	dITP/XTP pyrophosphatase
ddpA	P76128	0.181	0.559	0.764	FALSE	TRUE	1	Probable D,D-dipeptide-binding periplasmic protein DdpA
mgsA	P0A731	0.181	0.253	0.839	FALSE	FALSE	0	Methylglyoxal synthase
ydjA	P0ACY1	0.181	0.0155	0.000256	FALSE	FALSE	0	Putative NAD(P)H nitroreductase YdjA
tktB	P33570	0.182	0.108	0.000195	FALSE	FALSE	0	Transketolase 2
ybcJ	P0AAS7	0.182	0.196	0.598	FALSE	FALSE	0	Uncharacterized protein YbcJ
btuE	P06610	0.183	0.0458	8.03e-05	FALSE	FALSE	0	Vitamin B12 transport periplasmic protein BtuE
yqiC	Q46868	0.183	0.136	0.991	FALSE	FALSE	0	Uncharacterized protein YqiC
narL	P0AF28	0.184	0.104	0.0486	FALSE	FALSE	0	Nitrate/nitrite response regulator protein NarL
glk	P0A6V8	0.185	0.269	0.165	FALSE	FALSE	0	Glucokinase
recJ	P21893	0.185	0.202	0.0223	FALSE	FALSE	0	Single-stranded-DNA-specific exonuclease RecJ
argC	P11446	0.186	0.251	0.047	FALSE	FALSE	0	N-acetyl-gamma-glutamyl-phosphate reductase
blc	P0A901	0.186	0.0855	0.37	FALSE	FALSE	0	Outer membrane lipoprotein Blc
deoC	P0A6L0	0.186	0.0526	0.912	FALSE	FALSE	0	Deoxyribose-phosphate aldolase
katG	P13029	0.186	0.0574	0.00371	FALSE	FALSE	0	Catalase-peroxidase
mreB	P0A9X4	0.186	0.0824	0.726	FALSE	FALSE	0	Rod shape-determining protein MreB
proQ	P45577	0.186	0.0171	0.00998	FALSE	FALSE	0	RNA chaperone ProQ
dnaX	P06710	0.187	0.0548	0.0662	FALSE	FALSE	0	DNA polymerase III subunit tau
gyrB	P0AES6	0.187	0.056	0.0535	FALSE	FALSE	0	DNA gyrase subunit B
ppx	P0AFL6	0.188	0.0284	0.176	FALSE	FALSE	0	Exopolyphosphatase
ubiH	P25534	0.189	0.104	0.0304	FALSE	FALSE	0	2-octaprenyl-6-methoxyphenol hydroxylase
fbaB	P0A991	0.19	0.0713	0.000695	FALSE	FALSE	0	Fructose-bisphosphate aldolase class 1
mtnN	P0AF12	0.19	0.0172	0.103	FALSE	FALSE	0	5-methylthioadenosine/S-adenosylhomocysteine nucleosidase
ydhR	P0ACX3	0.19	0.101	0.0386	FALSE	FALSE	0	Putative monooxygenase YdhR
gstA	P0A9D2	0.191	0.257	0.153	FALSE	FALSE	0	Glutathione S-transferase GstA
dcyD	P76316	0.192	0.0907	0.654	FALSE	FALSE	0	D-cysteine desulfhydrase
mutT	P08337	0.192	0.206	0.0234	FALSE	TRUE	2	8-oxo-dGTP diphosphatase
recG	P24230	0.192	0.841	0.307	FALSE	TRUE	6	ATP-dependent DNA helicase RecG
wecC	P27829	0.192	0.204	0.809	FALSE	FALSE	0	UDP-N-acetyl-D-mannosamine dehydrogenase
rpsL	P0A7S3	0.193	0.25	0.399	FALSE	FALSE	0	30S ribosomal protein S12
ycbL	P75849	0.193	0.0397	0.44	FALSE	FALSE	0	Uncharacterized protein YcbL
ppk	P0A7B1	0.194	0.0306	0.00888	FALSE	FALSE	0	Polyphosphate kinase
yfcN	P0A8B2	0.195	0.139	0.747	FALSE	FALSE	0	UPF0115 protein YfcN
rpsK	P0A7R9	0.196	0.0704	0.0498	FALSE	FALSE	0	30S ribosomal protein S11
ycbZ	P75867	0.196	0.0823	0.12	FALSE	FALSE	0	Putative Lon protease homolog
rimJ	P0A948	0.197	0.729	0.0278	FALSE	TRUE	5	Ribosomal-protein-alanine acetyltransferase
grxC	P0AC62	0.197	0.0485	0.00633	FALSE	FALSE	0	Glutaredoxin-3
gshB	P04425	0.197	0.13	0.738	FALSE	FALSE	0	Glutathione synthetase
ygiM	P0ADT8	0.197	0.367	0.0248	FALSE	FALSE	0	Uncharacterized protein YgiM
ribE	P61714	0.198	0.0992	0.607	FALSE	FALSE	0	6,7-dimethyl-8-ribityllumazine synthase
ybaL	P39830	0.198	0.0826	0.000368	FALSE	FALSE	0	Inner membrane protein YbaL
yiiS	P32162	0.198	0.237	0.783	FALSE	FALSE	0	UPF0381 protein YiiS
lolC	P0ADC3	0.199	0.117	0.0424	FALSE	FALSE	0	Lipoprotein-releasing system transmembrane protein LolC
nagC	P0AF20	0.199	0.0271	0.875	FALSE	FALSE	0	N-acetylglucosamine repressor
rpsU	P68679	0.199	0.313	0.669	FALSE	FALSE	0	30S ribosomal protein S21
aspS	P21889	0.2	0.0194	0.623	FALSE	FALSE	0	Aspartate--tRNA ligase
ftsY	P10121	0.2	0.0467	0.844	FALSE	FALSE	0	Signal recognition particle receptor FtsY
manY	P69801	0.201	0.178	0.000323	FALSE	FALSE	0	Mannose permease IIC component
htrL	P25666	0.202	0.715	0.126	FALSE	TRUE	8	Protein HtrL
galE	P09147	0.204	0.0353	0.000195	FALSE	FALSE	0	UDP-glucose 4-epimerase
lepB	P00803	0.204	0.697	0.162	FALSE	FALSE	0	Signal peptidase I
yjgA	P0A8X0	0.205	0.0575	0.778	FALSE	FALSE	0	UPF0307 protein YjgA
adk	P69441	0.206	0.0267	0.0166	FALSE	FALSE	0	Adenylate kinase
cobT	P36562	0.207	0.788	0.741	FALSE	TRUE	10	Nicotinate-nucleotide--dimethylbenzimidazole phosphoribosyltransferase
wrbA	P0A8G6	0.207	0.0678	0.0953	FALSE	FALSE	0	NAD(P)H dehydrogenase (quinone)
yccX	P0AB65	0.208	0.292	0.97	FALSE	FALSE	0	Acylphosphatase
murC	P17952	0.209	0.012	0.153	FALSE	FALSE	0	UDP-N-acetylmuramate--L-alanine ligase
queA	P0A7F9	0.209	0.0585	0.00105	FALSE	FALSE	0	S-adenosylmethionine:tRNA ribosyltransferase-isomerase
wbbJ	P37750	0.209	0.0822	0.104	FALSE	FALSE	0	Putative lipopolysaccharide biosynthesis O-acetyl transferase WbbJ
atpF	P0ABA0	0.21	0.13	0.141	FALSE	FALSE	0	ATP synthase subunit b
rho	P0AG30	0.21	0.0518	0.782	FALSE	FALSE	0	Transcription termination factor Rho
rsmB	P36929	0.21	0.0474	0.0266	FALSE	FALSE	0	Ribosomal RNA small subunit methyltransferase B
puuC	P23883	0.211	0.614	0.00144	FALSE	TRUE	6	Aldehyde dehydrogenase PuuC
iraP	P0AAN9	0.212	0.247	0.123	FALSE	FALSE	0	Anti-adapter protein IraP
rapZ	P0A894	0.212	0.118	0.627	FALSE	FALSE	0	RNase adapter protein RapZ
yhcB	P0ADW3	0.214	0.00384	0.00218	FALSE	FALSE	0	Inner membrane protein YhcB
proV	P14175	0.215	0.594	4.64e-07	FALSE	TRUE	1	Glycine betaine/L-proline transport ATP-binding protein ProV
lptB	P0A9V1	0.215	0.0119	0.273	FALSE	FALSE	0	Lipopolysaccharide export system ATP-binding protein LptB
ptsP	P37177	0.215	0.0201	0.881	FALSE	FALSE	0	Phosphoenolpyruvate-protein phosphotransferase PtsP
folE	P0A6T5	0.217	0.108	0.0059	FALSE	FALSE	0	GTP cyclohydrolase 1
yqaB	P77475	0.217	0.601	0.0298	FALSE	TRUE	9	Fructose-1-phosphate phosphatase YqaB
grxB	P0AC59	0.218	0.03	1.28e-06	FALSE	FALSE	0	Glutaredoxin-2
hha	P0ACE3	0.219	0.268	0.0431	FALSE	FALSE	0	Hemolysin expression-modulating protein Hha
pyrD	P0A7E1	0.22	0.0645	0.174	FALSE	FALSE	0	Dihydroorotate dehydrogenase (quinone)
udk	P0A8F4	0.22	0.0299	0.0844	FALSE	FALSE	0	Uridine kinase
rob	P0ACI0	0.221	0.0225	0.413	FALSE	FALSE	0	Right origin-binding protein
selD	P16456	0.221	0.0591	0.0125	FALSE	FALSE	0	Selenide, water dikinase
dcrB	P0AEE1	0.222	0.193	0.746	FALSE	FALSE	0	Protein DcrB
gatY	P0C8J6	0.223	0.333	0.00822	FALSE	FALSE	0	D-tagatose-1,6-bisphosphate aldolase subunit GatY
matP	P0A8N0	0.223	0.131	0.205	FALSE	FALSE	0	Macrodomain Ter protein
manX	P69797	0.224	0.123	0.0184	FALSE	FALSE	0	PTS system mannose-specific EIIAB component;Mannose-specific phosphotransferase enzyme IIA component;Mannose-specific phosphotransferase enzyme IIB component
gyrA	P0AES4	0.225	0.00636	0.0045	FALSE	FALSE	0	DNA gyrase subunit A
prkB	P0AEX5	0.226	0.0844	0.966	FALSE	FALSE	0	Probable phosphoribulokinase
uxaC	P0A8G3	0.226	0.0567	0.277	FALSE	FALSE	0	Uronate isomerase
rodZ	P27434	0.227	0.038	0.876	FALSE	FALSE	0	Cytoskeleton protein RodZ
yebE	P33218	0.227	0.385	0.833	FALSE	FALSE	0	Inner membrane protein YebE
yfbU	P0A8W8	0.227	0.0172	0.233	FALSE	FALSE	0	UPF0304 protein YfbU
bglA	Q46829	0.228	0.00255	0.00809	FALSE	FALSE	0	6-phospho-beta-glucosidase BglA
infC	P0A707	0.228	0.0126	0.000256	FALSE	FALSE	0	Translation initiation factor IF-3;Translation initiation factor IF-3, N-terminally processed;Translation initiation factor IF-3S
nusB	P0A780	0.228	0.025	0.0334	FALSE	FALSE	0	N utilization substance protein B
pyrI	P0A7F3	0.228	0.109	0.0565	FALSE	FALSE	0	Aspartate carbamoyltransferase regulatory chain
rpoN	P24255	0.228	0.0255	0.0029	FALSE	FALSE	0	RNA polymerase sigma-54 factor
ynfB	P76170	0.228	0.0682	0.531	FALSE	FALSE	0	UPF0482 protein YnfB
dppC	P0AEG1	0.229	0.094	0.638	FALSE	FALSE	0	Dipeptide transport system permease protein DppC
deoD	P0ABP8	0.23	0.00564	0.0203	FALSE	FALSE	0	Purine nucleoside phosphorylase DeoD-type
sapA	Q47622	0.23	0.713	0.212	FALSE	TRUE	7	Peptide transport periplasmic protein SapA
add	P22333	0.231	0.0185	0.699	FALSE	FALSE	0	Adenosine deaminase
ybgI	P0AFP6	0.232	0.0155	0.0123	FALSE	FALSE	0	Putative GTP cyclohydrolase 1 type 2
flgM	P0AEM4	0.233	0.595	0.636	FALSE	TRUE	9	Negative regulator of flagellin synthesis
lysS	P0A8N3	0.233	0.00287	0.118	FALSE	FALSE	0	Lysine--tRNA ligase
ppiB	P23869	0.235	0.0602	0.284	FALSE	FALSE	0	Peptidyl-prolyl cis-trans isomerase B
ribD	P25539	0.235	0.0193	0.423	FALSE	FALSE	0	Riboflavin biosynthesis protein RibD;Diaminohydroxyphosphoribosylaminopyrimidine deaminase;5-amino-6-(5-phosphoribosylamino)uracil reductase
sdaA	P16095	0.236	0.664	0.0314	FALSE	TRUE	5	L-serine dehydratase 1
dppD	P0AAG0	0.238	0.0133	0.908	FALSE	FALSE	0	Dipeptide transport ATP-binding protein DppD
purU	P37051	0.239	0.0297	0.000649	FALSE	FALSE	0	Formyltetrahydrofolate deformylase
yicC	P23839	0.239	0.024	0.194	FALSE	FALSE	0	UPF0701 protein YicC
nuoB	P0AFC7	0.24	0.018	0.281	FALSE	FALSE	0	NADH-quinone oxidoreductase subunit B
yceB	P0AB26	0.241	0.121	0.000256	FALSE	FALSE	0	Uncharacterized lipoprotein YceB
sspA	P0ACA3	0.241	0.00683	0.000369	FALSE	FALSE	0	Stringent starvation protein A
deoA	P07650	0.243	0.0387	0.0177	FALSE	FALSE	0	Thymidine phosphorylase
rlmB	P63177	0.243	0.181	0.832	FALSE	FALSE	0	23S rRNA (guanosine-2-O-)-methyltransferase RlmB
pepN	P04825	0.244	0.00115	0.00473	FALSE	FALSE	0	Aminopeptidase N
rpoE	P0AGB6	0.244	0.647	0.928	FALSE	TRUE	1	ECF RNA polymerase sigma-E factor
entA	P15047	0.245	0.233	0.0461	FALSE	FALSE	0	2,3-dihydro-2,3-dihydroxybenzoate dehydrogenase
gpt	P0A9M5	0.245	0.0402	0.0351	FALSE	FALSE	0	Xanthine phosphoribosyltransferase
gss	P0AES0	0.245	0.0152	0.00151	FALSE	FALSE	0	Bifunctional glutathionylspermidine synthetase/amidase;Glutathionylspermidine amidase;Glutathionylspermidine synthetase
rnhA	P0A7Y4	0.245	0.654	0.935	FALSE	TRUE	9	Ribonuclease HI
yciT	P76034	0.245	0.149	0.0917	FALSE	FALSE	0	Uncharacterized HTH-type transcriptional regulator YciT
rfaQ	P25742	0.246	0.152	0.38	FALSE	FALSE	0	Lipopolysaccharide core heptosyltransferase RfaQ
pgk	P0A799	0.247	0.0814	0.111	FALSE	FALSE	0	Phosphoglycerate kinase
rimP	P0A8A8	0.248	0.0402	0.0042	FALSE	FALSE	0	Ribosome maturation factor RimP
mrp	P0AF08	0.249	0.00723	0.0416	FALSE	FALSE	0	Protein mrp
hpt	P0A9M2	0.25	0.0246	0.00481	FALSE	FALSE	0	Hypoxanthine phosphoribosyltransferase
rplV	P61175	0.25	0.0267	0.158	FALSE	FALSE	0	50S ribosomal protein L22
tonB	P02929	0.25	0.196	0.236	FALSE	FALSE	0	Protein TonB
lplA	P32099	0.251	0.584	0.0351	FALSE	TRUE	8	Lipoate-protein ligase A
wecF	P56258	0.251	0.572	0.983	FALSE	TRUE	7	TDP-N-acetylfucosamine:lipid II N-acetylfucosaminyltransferase
nusA	P0AFF6	0.252	0.0168	0.207	FALSE	FALSE	0	Transcription termination/antitermination protein NusA
ytfJ	P39187	0.252	0.563	0.909	FALSE	TRUE	9	Uncharacterized protein YtfJ
rlmE	P0C0R7	0.253	0.0292	0.0061	FALSE	FALSE	0	Ribosomal RNA large subunit methyltransferase E
aceF	P06959	0.256	0.00669	0.000411	FALSE	FALSE	0	Dihydrolipoyllysine-residue acetyltransferase component of pyruvate dehydrogenase complex
fklB	P0A9L3	0.256	0.0661	0.0266	FALSE	FALSE	0	FKBP-type 22 kDa peptidyl-prolyl cis-trans isomerase
fadJ	P77399	0.258	0.621	0.047	FALSE	TRUE	7	Fatty acid oxidation complex subunit alpha;Enoyl-CoA hydratase/3-hydroxybutyryl-CoA epimerase;3-hydroxyacyl-CoA dehydrogenase
nuoC	P33599	0.258	0.00352	0.0199	FALSE	FALSE	0	NADH-quinone oxidoreductase subunit C/D
yheO	P64624	0.258	0.0231	0.0958	FALSE	FALSE	0	Uncharacterized protein YheO
yaeH	P62768	0.259	0.0339	0.0056	FALSE	FALSE	0	UPF0325 protein YaeH
yggX	P0A8P3	0.259	0.0676	0.806	FALSE	FALSE	0	Probable Fe(2+)-trafficking protein
asd	P0A9Q9	0.261	0.124	0.258	FALSE	FALSE	0	Aspartate-semialdehyde dehydrogenase
mlaB	P64602	0.261	0.1	0.525	FALSE	FALSE	0	Probable phospholipid ABC transporter-binding protein MlaB
spoT	P0AG24	0.261	0.0367	0.00542	FALSE	FALSE	0	Bifunctional (p)ppGpp synthase/hydrolase SpoT;GTP pyrophosphokinase;Guanosine-3,5-bis(diphosphate) 3-pyrophosphohydrolase
tatE	P0A843	0.261	0.436	0.743	FALSE	TRUE	4	Sec-independent protein translocase protein TatE
yagU	P0AAA1	0.263	0.299	0.134	FALSE	FALSE	0	Inner membrane protein YagU
yqjH	Q46871	0.263	0.062	0.51	FALSE	FALSE	0	NADPH-dependent ferric-chelate reductase
paaY	P77181	0.265	0.689	0.0902	FALSE	TRUE	3	Phenylacetic acid degradation protein PaaY
relA	P0AG20	0.265	0.0115	0.322	FALSE	FALSE	0	GTP pyrophosphokinase
rplL	P0A7K2	0.266	0.0695	0.217	FALSE	FALSE	0	50S ribosomal protein L7/L12
ubiX	P0AG03	0.267	0.0821	0.156	FALSE	FALSE	0	3-octaprenyl-4-hydroxybenzoate carboxy-lyase partner protein
ybiT	P0A9U3	0.267	0.00096	3.75e-05	FALSE	FALSE	0	Uncharacterized ABC transporter ATP-binding protein YbiT
pepQ	P21165	0.268	0.00144	0.231	FALSE	FALSE	0	Xaa-Pro dipeptidase
pmrD	P37590	0.269	0.0435	0.373	FALSE	FALSE	0	Signal transduction protein PmrD
aroG	P0AB91	0.27	0.0278	0.166	FALSE	FALSE	0	Phospho-2-dehydro-3-deoxyheptonate aldolase, Phe-sensitive
lnt	P23930	0.27	0.134	0.219	FALSE	FALSE	0	Apolipoprotein N-acyltransferase
sppA	P08395	0.272	0.0194	0.225	FALSE	FALSE	0	Protease 4
gloB	P0AC84	0.273	0.012	0.376	FALSE	FALSE	0	Hydroxyacylglutathione hydrolase
ftsI	P0AD68	0.274	0.0355	0.264	FALSE	FALSE	0	Peptidoglycan synthase FtsI
glsA1	P77454	0.274	0.0408	0.841	FALSE	FALSE	0	Glutaminase 1
rpsP	P0A7T3	0.274	0.00763	0.0249	FALSE	FALSE	0	30S ribosomal protein S16
yibL	P0ADK8	0.275	0.0114	0.0583	FALSE	FALSE	0	Uncharacterized protein YibL
rpiA	P0A7Z0	0.276	0.0415	0.615	FALSE	FALSE	0	Ribose-5-phosphate isomerase A
corC	P0AE78	0.278	0.00733	0.05	FALSE	FALSE	0	Magnesium and cobalt efflux protein CorC
queE	P64554	0.278	0.0285	0.00046	FALSE	FALSE	0	7-carboxy-7-deazaguanine synthase
speE	P09158	0.278	0.0935	0.000942	FALSE	FALSE	0	Polyamine aminopropyltransferase
glnS	P00962	0.279	0.00385	0.5	FALSE	FALSE	0	Glutamine--tRNA ligase
hemD	P09126	0.279	0.484	0.584	FALSE	TRUE	3	Uroporphyrinogen-III synthase
lpxM	P24205	0.279	0.203	0.469	FALSE	FALSE	0	Lipid A biosynthesis myristoyltransferase
panB	P31057	0.279	0.0159	0.486	FALSE	FALSE	0	3-methyl-2-oxobutanoate hydroxymethyltransferase
moeB	P12282	0.28	0.655	0.94	FALSE	TRUE	9	Molybdopterin-synthase adenylyltransferase
yidR	P31455	0.28	0.0857	0.138	FALSE	FALSE	0	Uncharacterized protein YidR
yigL	P27848	0.281	0.0314	0.0325	FALSE	FALSE	0	Pyridoxal phosphate phosphatase YigL
cbpA	P36659	0.284	0.191	0.642	FALSE	FALSE	0	Curved DNA-binding protein
glgP	P0AC86	0.287	0.032	0.401	FALSE	FALSE	0	Glycogen phosphorylase
hemY	P0ACB7	0.288	0.0551	0.231	FALSE	FALSE	0	Protein HemY
nadE	P18843	0.288	0.00559	0.0116	FALSE	FALSE	0	NH(3)-dependent NAD(+) synthetase
engB	P0A6P7	0.29	0.00121	0.025	FALSE	FALSE	0	Probable GTP-binding protein EngB
rsuA	P0AA43	0.291	0.0191	0.182	FALSE	FALSE	0	Ribosomal small subunit pseudouridine synthase A
ridA	P0AF93	0.293	0.0262	0.594	FALSE	FALSE	0	2-iminobutanoate/2-iminopropanoate deaminase
smrA	P76053	0.293	0.598	0.0791	FALSE	TRUE	4	Probable DNA endonuclease SmrA
tyrR	P07604	0.293	0.00576	0.886	FALSE	FALSE	0	Transcriptional regulatory protein TyrR
sohB	P0AG14	0.294	0.0129	0.103	FALSE	FALSE	0	Probable protease SohB
uspG	P39177	0.294	0.0806	0.309	FALSE	FALSE	0	Universal stress protein G
pheP	P24207	0.295	0.153	0.642	FALSE	TRUE	3	Phenylalanine-specific permease
selA	P0A821	0.295	0.0408	0.754	FALSE	FALSE	0	L-seryl-tRNA(Sec) selenium transferase
exbD	P0ABV2	0.296	0.0856	0.00291	FALSE	FALSE	0	Biopolymer transport protein ExbD
sspB	P0AFZ3	0.296	0.00797	0.0551	FALSE	FALSE	0	Stringent starvation protein B
tpiA	P0A858	0.297	0.047	0.526	FALSE	FALSE	0	Triosephosphate isomerase
katE	P21179	0.299	0.0423	3.32e-05	FALSE	FALSE	0	Catalase HPII
aceE	P0AFG8	0.3	0.00203	0.00043	FALSE	FALSE	0	Pyruvate dehydrogenase E1 component
rpsQ	P0AG63	0.3	0.0409	0.274	FALSE	FALSE	0	30S ribosomal protein S17
rsmI	P67087	0.3	0.0371	0.84	FALSE	FALSE	0	Ribosomal RNA small subunit methyltransferase I
thrS	P0A8M3	0.3	0.0164	0.838	FALSE	FALSE	0	Threonine--tRNA ligase
yeaH	P76235	0.3	0.24	0.886	FALSE	FALSE	0	UPF0229 protein YeaH
pepD	P15288	0.301	0.00147	0.0208	FALSE	FALSE	0	Cytosol non-specific dipeptidase
rmlA2	P61887	0.301	0.183	0.793	FALSE	FALSE	0	Glucose-1-phosphate thymidylyltransferase 2
rpsN	P0AG59	0.301	0.231	0.796	FALSE	FALSE	0	30S ribosomal protein S14
infB	P0A705	0.302	0.0014	0.00142	FALSE	FALSE	0	Translation initiation factor IF-2
moeA	P12281	0.302	0.0131	0.336	FALSE	FALSE	0	Molybdopterin molybdenumtransferase
pepB	P37095	0.302	0.00882	0.00288	FALSE	FALSE	0	Peptidase B
minC	P18196	0.306	0.0253	0.0468	FALSE	FALSE	0	Septum site-determining protein MinC
glpX	P0A9C9	0.308	0.00306	0.462	FALSE	FALSE	0	Fructose-1,6-bisphosphatase 1 class 2
nuoE	P0AFD1	0.308	0.0761	0.668	FALSE	FALSE	0	NADH-quinone oxidoreductase subunit E
ygdH	P0ADR8	0.308	0.00481	0.0447	FALSE	FALSE	0	LOG family protein YgdH
mnmA	P25745	0.309	0.034	0.0289	FALSE	FALSE	0	tRNA-specific 2-thiouridylase MnmA
thrB	P00547	0.31	0.0243	0.0767	FALSE	FALSE	0	Homoserine kinase
perM	P0AFI9	0.312	0.652	0.185	FALSE	TRUE	4	Putative permease PerM
fetA	P77279	0.315	0.224	0.253	FALSE	TRUE	1	Probable iron export ATP-binding protein FetA
hns	P0ACF8	0.315	0.014	0.0351	FALSE	FALSE	0	DNA-binding protein H-NS
menB	P0ABU0	0.315	0.0125	0.00666	FALSE	FALSE	0	1,4-dihydroxy-2-naphthoyl-CoA synthase
ubiG	P17993	0.315	0.0154	0.471	FALSE	FALSE	0	Ubiquinone biosynthesis O-methyltransferase
rpsT	P0A7U7	0.316	0.0136	0.127	FALSE	FALSE	0	30S ribosomal protein S20
fadR	P0A8V6	0.318	0.181	0.37	FALSE	FALSE	0	Fatty acid metabolism regulator protein
uspA	P0AED0	0.32	0.0732	0.0844	FALSE	FALSE	0	Universal stress protein A
ybiB	P30177	0.32	0.00442	0.332	FALSE	FALSE	0	Uncharacterized protein YbiB
nemA	P77258	0.321	0.0146	0.132	FALSE	FALSE	0	N-ethylmaleimide reductase
ycgM	P76004	0.321	0.0647	0.789	FALSE	FALSE	0	Uncharacterized protein YcgM
rffG	P27830	0.323	0.186	0.689	FALSE	FALSE	0	dTDP-glucose 4,6-dehydratase 2
fabZ	P0A6Q6	0.325	0.000598	0.00478	FALSE	FALSE	0	3-hydroxyacyl-[acyl-carrier-protein] dehydratase FabZ
glnP	P0AEQ6	0.327	0.0322	0.355	FALSE	FALSE	0	Glutamine transport system permease protein GlnP
rbfA	P0A7G2	0.327	0.00164	0.000147	FALSE	FALSE	0	Ribosome-binding factor A
yihD	P0ADP9	0.327	0.0431	0.0568	FALSE	FALSE	0	Protein YihD
yjbQ	P0AF48	0.329	0.0121	0.0152	FALSE	FALSE	0	UPF0047 protein YjbQ
ydeJ	P31131	0.33	0.425	0.0317	FALSE	TRUE	6	Protein YdeJ
ppiC	P0A9L5	0.33	0.0452	0.473	FALSE	FALSE	0	Peptidyl-prolyl cis-trans isomerase C
ptsN	P69829	0.33	0.0643	0.745	FALSE	FALSE	0	Nitrogen regulatory protein
rne	P21513	0.33	0.00284	0.0567	FALSE	FALSE	0	Ribonuclease E
aroF	P00888	0.332	0.00273	0.00218	FALSE	FALSE	0	Phospho-2-dehydro-3-deoxyheptonate aldolase, Tyr-sensitive
thiL	P0AGG0	0.332	0.0188	0.403	FALSE	FALSE	0	Thiamine-monophosphate kinase
lapA	P0ACV4	0.333	0.0174	0.156	FALSE	FALSE	0	Lipopolysaccharide assembly protein A
rfaB	P27127	0.335	0.0466	0.067	FALSE	TRUE	1	Lipopolysaccharide 1,6-galactosyltransferase
rlmJ	P37634	0.335	0.00559	0.00172	FALSE	FALSE	0	Ribosomal RNA large subunit methyltransferase J
ratA	P0AGL5	0.337	0.518	0.175	FALSE	TRUE	1	Ribosome association toxin RatA
acuI	P26646	0.338	0.0101	0.0199	FALSE	FALSE	0	Probable acrylyl-CoA reductase AcuI
yeeX	P0A8M6	0.338	0.00908	0.571	FALSE	FALSE	0	UPF0265 protein YeeX
proW	P14176	0.341	0.546	5.36e-06	FALSE	TRUE	5	Glycine betaine/L-proline transport system permease protein ProW
rpsS	P0A7U3	0.341	0.107	0.24	FALSE	FALSE	0	30S ribosomal protein S19
rpmD	P0AG51	0.344	0.124	0.168	FALSE	FALSE	0	50S ribosomal protein L30
thrA	P00561	0.345	0.00411	0.206	FALSE	FALSE	0	Bifunctional aspartokinase/homoserine dehydrogenase 1;Aspartokinase;Homoserine dehydrogenase
ung	P12295	0.345	0.0288	0.044	FALSE	FALSE	0	Uracil-DNA glycosylase
yhbY	P0AGK4	0.345	0.0334	0.401	FALSE	FALSE	0	RNA-binding protein YhbY
ycfH	P0AFQ7	0.346	0.0501	0.239	FALSE	FALSE	0	Uncharacterized deoxyribonuclease YcfH
ptsG	P69786	0.347	0.00888	0.000416	FALSE	FALSE	0	PTS system glucose-specific EIICB component;Glucose permease IIC component;Glucose-specific phosphotransferase enzyme IIB component
yajO	P77735	0.347	0.00824	0.407	FALSE	FALSE	0	Uncharacterized oxidoreductase YajO
yejA	P33913	0.347	0.395	0.0551	FALSE	TRUE	9	Uncharacterized protein YejA
dkgB	P30863	0.349	0.0267	0.0449	FALSE	FALSE	0	2,5-diketo-D-gluconic acid reductase B
rpmB	P0A7M2	0.352	0.0491	0.208	FALSE	FALSE	0	50S ribosomal protein L28
yhfA	P0ADX1	0.352	0.00861	0.458	FALSE	FALSE	0	Protein YhfA
gpmI	P37689	0.353	0.166	0.0557	FALSE	FALSE	0	2,3-bisphosphoglycerate-independent phosphoglycerate mutase
ubiE	P0A887	0.353	0.00131	0.00396	FALSE	FALSE	0	Ubiquinone/menaquinone biosynthesis C-methyltransferase UbiE
ydiK	P0AFS7	0.354	0.597	0.504	FALSE	TRUE	10	UPF0118 inner membrane protein YdiK
bluR	P75989	0.355	0.308	0.682	FALSE	TRUE	1	HTH-type transcriptional repressor BluR
pyrB	P0A786	0.36	0.0026	0.245	FALSE	FALSE	0	Aspartate carbamoyltransferase catalytic chain
yeaG	P0ACY3	0.362	0.0176	0.233	FALSE	FALSE	0	Uncharacterized protein YeaG
narZ	P19319	0.366	0.619	0.871	FALSE	TRUE	10	Respiratory nitrate reductase 2 alpha chain
yadG	P36879	0.369	0.00119	0.198	FALSE	FALSE	0	Uncharacterized ABC transporter ATP-binding protein YadG
yffB	P24178	0.369	0.022	0.0271	FALSE	FALSE	0	Protein YffB
ygiS	Q46863	0.369	0.457	0.115	FALSE	TRUE	6	Probable deoxycholate-binding periplasmic protein YgiS
priB	P07013	0.37	0.641	0.991	FALSE	TRUE	6	Primosomal replication protein n
dcd	P28248	0.371	0.00149	0.000889	FALSE	FALSE	0	Deoxycytidine triphosphate deaminase
typA	P32132	0.371	0.001	0.00679	FALSE	FALSE	0	GTP-binding protein TypA/BipA
prfA	P0A7I0	0.374	0.00613	0.34	FALSE	FALSE	0	Peptide chain release factor 1
ygiN	P0ADU2	0.375	0.00751	0.401	FALSE	FALSE	0	Probable quinol monooxygenase YgiN
ansB	P00805	0.377	0.249	0.273	FALSE	FALSE	0	L-asparaginase 2
modE	P0A9G8	0.377	0.233	0.196	FALSE	FALSE	0	Transcriptional regulator ModE
uvrD	P03018	0.377	0.00413	0.0555	FALSE	FALSE	0	DNA helicase II
mglA	P0AAG8	0.378	0.0604	8.72e-05	FALSE	FALSE	0	Galactose/methyl galactoside import ATP-binding protein MglA
oxyR	P0ACQ4	0.378	0.00699	0.502	FALSE	FALSE	0	Hydrogen peroxide-inducible genes activator
mlaE	P64606	0.379	0.0695	0.682	FALSE	FALSE	0	Probable phospholipid ABC transporter permease protein MlaE
rssA	P0AFR0	0.379	0.144	0.531	FALSE	TRUE	1	NTE family protein RssA
yegD	P36928	0.38	0.38	0.0166	FALSE	TRUE	3	Uncharacterized chaperone protein YegD
glgA	P0A6U8	0.38	0.00201	0.473	FALSE	FALSE	0	Glycogen synthase
rnk	P0AFW4	0.38	0.0131	0.57	FALSE	FALSE	0	Regulator of nucleoside diphosphate kinase
hsdR	P08956	0.381	0.0834	0.663	FALSE	FALSE	0	Type I restriction enzyme EcoKI R protein
yedI	P46125	0.381	0.00383	0.0103	FALSE	FALSE	0	Inner membrane protein YedI
clpP	P0A6G7	0.383	0.00181	0.842	FALSE	FALSE	0	ATP-dependent Clp protease proteolytic subunit
pepP	P15034	0.385	0.00645	0.0106	FALSE	FALSE	0	Xaa-Pro aminopeptidase
tldD	P0AGG8	0.386	0.0243	0.193	FALSE	FALSE	0	Metalloprotease TldD
yrdA	P0A9W9	0.387	0.00193	0.0255	FALSE	FALSE	0	Protein YrdA
obgE	P42641	0.388	0.00106	0.0469	FALSE	FALSE	0	GTPase ObgE/CgtA
rfbC	P37745	0.393	0.0158	0.582	FALSE	FALSE	0	dTDP-4-dehydrorhamnose 3,5-epimerase
uvrY	P0AED5	0.393	0.00625	0.401	FALSE	FALSE	0	Response regulator UvrY
yaiA	P0AAN5	0.393	0.0262	0.00148	FALSE	FALSE	0	Uncharacterized protein YaiA
mscL	P0A742	0.394	0.212	0.0469	FALSE	FALSE	0	Large-conductance mechanosensitive channel
suhB	P0ADG4	0.395	0.000184	0.00302	FALSE	FALSE	0	Inositol-1-monophosphatase
tsx	P0A927	0.397	0.0885	0.0431	FALSE	FALSE	0	Nucleoside-specific channel-forming protein tsx
hemH	P23871	0.4	0.0247	0.000153	FALSE	TRUE	1	Ferrochelatase
serS	P0A8L1	0.406	0.00211	0.985	FALSE	FALSE	0	Serine--tRNA ligase
racR	P76062	0.408	0.000312	0.00618	FALSE	FALSE	0	Rac prophage repressor
zntA	P37617	0.408	0.254	0.671	FALSE	FALSE	0	Lead, cadmium, zinc and mercury-transporting ATPase
crp	P0ACJ8	0.41	0.00104	0.0563	FALSE	FALSE	0	cAMP-activated global transcriptional regulator CRP
mdtE	P37636	0.41	0.464	0.359	FALSE	TRUE	4	Multidrug resistance protein MdtE
dppF	P37313	0.411	0.00739	0.733	FALSE	FALSE	0	Dipeptide transport ATP-binding protein DppF
bolA	P0ABE2	0.413	0.536	0.239	FALSE	FALSE	0	Protein BolA
rsgA	P39286	0.416	0.0358	0.866	FALSE	FALSE	0	Putative ribosome biogenesis GTPase RsgA
greA	P0A6W5	0.417	0.000259	0.073	FALSE	FALSE	0	Transcription elongation factor GreA
mdtA	P76397	0.418	0.48	0.446	FALSE	TRUE	8	Multidrug resistance protein MdtA
rdoA	P0C0K3	0.418	0.0282	0.161	FALSE	TRUE	1	Protein RdoA
lysU	P0A8N5	0.419	0.00354	0.145	FALSE	FALSE	0	Lysine--tRNA ligase, heat inducible
yibA	P0ADK6	0.422	0.496	0.852	FALSE	TRUE	10	Protein YibA
yjjX	P39411	0.424	0.103	0.187	FALSE	TRUE	1	Non-canonical purine NTP phosphatase
rpmF	P0A7N4	0.427	0.0381	0.132	FALSE	FALSE	0	50S ribosomal protein L32
rstB	P18392	0.427	0.00734	0.0205	FALSE	FALSE	0	Sensor protein RstB
ruvA	P0A809	0.428	0.0933	0.343	FALSE	FALSE	0	Holliday junction ATP-dependent DNA helicase RuvA
yecD	P0ADI7	0.431	0.0157	0.006	FALSE	FALSE	0	Isochorismatase family protein YecD
trmA	P23003	0.433	0.0259	0.249	FALSE	FALSE	0	tRNA/tmRNA (uracil-C(5))-methyltransferase
ybeD	P0A8J4	0.436	0.0525	0.302	FALSE	FALSE	0	UPF0250 protein YbeD
glf	P37747	0.439	0.000171	0.073	FALSE	FALSE	0	UDP-galactopyranose mutase
pfkA	P0A796	0.439	0.0341	0.0353	FALSE	FALSE	0	ATP-dependent 6-phosphofructokinase isozyme 1
exoX	P0AEK0	0.44	0.0471	0.886	FALSE	FALSE	0	Exodeoxyribonuclease 10
hisA	P10371	0.44	0.0278	0.401	FALSE	FALSE	0	1-(5-phosphoribosyl)-5-[(5-phosphoribosylamino)methylideneamino] imidazole-4-carboxamide isomerase
ycdX	P75914	0.44	0.0041	0.0216	FALSE	FALSE	0	Probable phosphatase YcdX
glgC	P0A6V1	0.441	0.0015	0.313	FALSE	FALSE	0	Glucose-1-phosphate adenylyltransferase
ndh	P00393	0.441	0.00178	0.00248	FALSE	FALSE	0	NADH dehydrogenase
evgA	P0ACZ4	0.442	0.0572	0.121	FALSE	FALSE	0	Positive transcription regulator EvgA
zur	P0AC51	0.443	0.00336	0.277	FALSE	FALSE	0	Zinc uptake regulation protein
ubiI	P25535	0.445	0.00199	0.0224	FALSE	FALSE	0	2-octaprenylphenol hydroxylase
yciN	P0AB61	0.446	0.0819	0.528	FALSE	FALSE	0	Protein YciN
mazG	P0AEY3	0.447	0.235	0.833	FALSE	TRUE	1	Nucleoside triphosphate pyrophosphohydrolase
xylB	P09099	0.449	0.416	0.342	FALSE	TRUE	9	Xylulose kinase
qmcA	P0AA53	0.45	0.000694	0.0168	FALSE	FALSE	0	Protein QmcA
ribB	P0A7J0	0.452	0.0125	0.144	FALSE	FALSE	0	3,4-dihydroxy-2-butanone 4-phosphate synthase
yidA	P0A8Y5	0.452	0.00547	0.0217	FALSE	FALSE	0	Sugar phosphatase YidA
fbaA	P0AB71	0.457	0.0128	0.289	FALSE	FALSE	0	Fructose-bisphosphate aldolase class 2
yhhX	P46853	0.457	0.00162	0.915	FALSE	FALSE	0	Uncharacterized oxidoreductase YhhX
yqjI	P64588	0.46	0.0211	0.0976	FALSE	FALSE	0	Transcriptional regulator YqjI
fetB	P77307	0.464	0.00952	0.0742	FALSE	FALSE	0	Probable iron export permease protein FetB
uidR	P0ACT6	0.464	0.198	0.502	FALSE	TRUE	4	HTH-type transcriptional regulator UidR
cusF	P77214	0.465	0.521	0.00139	FALSE	TRUE	6	Cation efflux system protein CusF
yeiG	P33018	0.467	3.58e-05	1.41e-05	FALSE	FALSE	0	S-formylglutathione hydrolase YeiG
ydhV	P76192	0.468	0.429	0.0199	FALSE	TRUE	9	Uncharacterized oxidoreductase YdhV
rnd	P09155	0.468	0.0504	0.569	FALSE	TRUE	1	Ribonuclease D
sbmC	P33012	0.47	0.022	0.758	FALSE	FALSE	0	DNA gyrase inhibitor
yfiC	P31825	0.471	0.535	0.522	FALSE	TRUE	10	tRNA1(Val) (adenine(37)-N6)-methyltransferase
chrR	P0AGE6	0.474	0.000901	0.00422	FALSE	FALSE	0	Chromate reductase
ldcC	P52095	0.474	0.0256	0.0678	FALSE	FALSE	0	Lysine decarboxylase, constitutive
rlmG	P42596	0.475	0.452	0.0166	FALSE	TRUE	2	Ribosomal RNA large subunit methyltransferase G
udp	P12758	0.476	0.000136	6.16e-05	FALSE	FALSE	0	Uridine phosphorylase
mobA	P32173	0.477	0.206	0.519	FALSE	TRUE	4	Molybdenum cofactor guanylyltransferase
rluB	P37765	0.477	0.000901	8.72e-05	FALSE	FALSE	0	Ribosomal large subunit pseudouridine synthase B
glgX	P15067	0.478	0.0019	0.0401	FALSE	FALSE	0	Glycogen debranching enzyme
cvrA	P76007	0.484	0.125	0.0178	FALSE	TRUE	1	K(+)/H(+) antiporter NhaP2
rpsF	P02358	0.486	0.00522	0.0392	FALSE	FALSE	0	30S ribosomal protein S6;30S ribosomal protein S6, fully modified isoform;30S ribosomal protein S6, non-modified isoform
hisH	P60595	0.487	0.0294	0.182	FALSE	FALSE	0	Imidazole glycerol phosphate synthase subunit HisH
infA	P69222	0.491	0.000448	0.00489	FALSE	FALSE	0	Translation initiation factor IF-1
sapF	P0AAH8	0.497	0.398	0.258	FALSE	TRUE	9	Peptide transport system ATP-binding protein SapF
modC	P09833	0.501	0.507	0.212	FALSE	TRUE	10	Molybdenum import ATP-binding protein ModC
yhbS	P63417	0.501	0.097	0.598	FALSE	FALSE	0	Uncharacterized N-acetyltransferase YhbS
entH	P0A8Y8	0.504	0.229	0.673	FALSE	TRUE	7	Proofreading thioesterase EntH
yeaO	P76243	0.505	0.00112	0.795	FALSE	FALSE	0	Uncharacterized protein YeaO
ymdB	P0A8D6	0.507	0.0113	0.0742	FALSE	FALSE	0	O-acetyl-ADP-ribose deacetylase
rpsO	P0ADZ4	0.508	0.0844	0.569	FALSE	FALSE	0	30S ribosomal protein S15
pflA	P0A9N4	0.509	0.000839	0.531	FALSE	FALSE	0	Pyruvate formate-lyase 1-activating enzyme
gmhB	P63228	0.513	0.0485	0.0815	FALSE	FALSE	0	D-glycero-beta-D-manno-heptose-1,7-bisphosphate 7-phosphatase
yfaY	P77808	0.515	0.00802	0.894	FALSE	FALSE	0	NMN amidohydrolase-like protein YfaY
ybdF	P0AAT2	0.52	0.441	0.131	FALSE	TRUE	6	Uncharacterized protein YbdF
pnp	P05055	0.52	7.51e-05	0.000606	FALSE	FALSE	0	Polyribonucleotide nucleotidyltransferase
ulaR	P0A9W0	0.52	0.000904	0.401	FALSE	FALSE	0	HTH-type transcriptional regulator UlaR
yjbR	P0AF50	0.52	0.018	0.156	FALSE	FALSE	0	Uncharacterized protein YjbR
ykgO	Q2EEQ2	0.524	0.751	0.457	FALSE	TRUE	4	50S ribosomal protein L36 2
sbcB	P04995	0.527	0.0139	0.0341	FALSE	FALSE	0	Exodeoxyribonuclease I
dicA	P06966	0.532	0.0199	0.00478	FALSE	TRUE	6	HTH-type transcriptional regulator DicA
narG	P09152	0.533	0.0865	0.368	FALSE	FALSE	0	Respiratory nitrate reductase 1 alpha chain
cysZ	P0A6J3	0.537	0.156	0.908	FALSE	TRUE	1	Sulfate transporter CysZ
dadA	P0A6J5	0.538	0.00285	0.0199	FALSE	FALSE	0	D-amino acid dehydrogenase
ycbX	P75863	0.538	0.000768	0.355	FALSE	FALSE	0	Uncharacterized protein YcbX
arnA	P77398	0.542	0.295	0.44	FALSE	TRUE	8	Bifunctional polymyxin resistance protein ArnA;UDP-4-amino-4-deoxy-L-arabinose formyltransferase;UDP-glucuronic acid oxidase, UDP-4-keto-hexauronic acid decarboxylating
glnA	P0A9C5	0.547	0.00045	0.496	FALSE	FALSE	0	Glutamine synthetase
pepT	P29745	0.551	0.00687	0.0218	FALSE	FALSE	0	Peptidase T
yiaJ	P37671	0.551	0.164	0.383	FALSE	TRUE	3	HTH-type transcriptional regulator YiaJ
lpxL	P0ACV0	0.553	0.00149	0.000591	FALSE	FALSE	0	Lipid A biosynthesis lauroyltransferase
narH	P11349	0.56	0.0856	0.284	FALSE	FALSE	0	Respiratory nitrate reductase 1 beta chain
gltL	P0AAG3	0.562	0.0182	0.64	FALSE	FALSE	0	Glutamate/aspartate transport ATP-binding protein GltL
glnQ	P10346	0.571	0.00735	0.214	FALSE	FALSE	0	Glutamine transport ATP-binding protein GlnQ
csrD	P13518	0.572	0.426	0.256	FALSE	TRUE	10	RNase E specificity factor CsrD
ycgB	P29013	0.572	0.00461	0.734	FALSE	FALSE	0	Uncharacterized protein YcgB
ycjG	P51981	0.574	0.00175	0.793	FALSE	FALSE	0	L-Ala-D/L-Glu epimerase
ybgJ	P0AAV4	0.576	0.243	0.745	FALSE	TRUE	1	Uncharacterized protein YbgJ
ispD	Q46893	0.579	0.317	0.828	FALSE	TRUE	7	2-C-methyl-D-erythritol 4-phosphate cytidylyltransferase
cdd	P0ABF6	0.58	0.000198	0.0161	FALSE	FALSE	0	Cytidine deaminase
cspB	P36995	0.582	0.191	0.196	FALSE	FALSE	0	Cold shock-like protein CspB
fadM	P77712	0.583	0.22	7.42e-05	FALSE	TRUE	6	Long-chain acyl-CoA thioesterase FadM
cspE	P0A972	0.59	0.00169	0.909	FALSE	FALSE	0	Cold shock-like protein CspE
hisF	P60664	0.591	0.00888	0.226	FALSE	FALSE	0	Imidazole glycerol phosphate synthase subunit HisF
ydfZ	P64463	0.602	0.257	0.851	FALSE	FALSE	0	Putative selenoprotein YdfZ
dusC	P33371	0.603	0.25	0.0791	FALSE	TRUE	10	tRNA-dihydrouridine synthase C
yieP	P31475	0.605	0.000278	7.91e-05	FALSE	FALSE	0	Uncharacterized HTH-type transcriptional regulator YieP
hisB	P06987	0.608	0.0166	0.615	FALSE	FALSE	0	Histidine biosynthesis bifunctional protein HisB;Histidinol-phosphatase;Imidazoleglycerol-phosphate dehydratase
ampE	P0AE14	0.613	0.0339	0.313	FALSE	FALSE	0	Protein AmpE
hyaB	P0ACD8	0.613	0.0913	0.849	FALSE	TRUE	6	Hydrogenase-1 large chain
yeeZ	P0AD12	0.614	0.142	0.473	FALSE	FALSE	0	Protein YeeZ
zapA	P0ADS2	0.62	6.86e-05	0.00656	FALSE	FALSE	0	Cell division protein ZapA
rsd	P0AFX4	0.625	0.177	0.359	FALSE	TRUE	9	Regulator of sigma D
rpiR	P0ACS7	0.627	0.178	0.944	FALSE	TRUE	1	HTH-type transcriptional regulator RpiR
ynjB	P76223	0.631	0.15	0.322	FALSE	TRUE	1	Protein YnjB
nadB	P10902	0.638	0.00361	0.00706	FALSE	FALSE	0	L-aspartate oxidase
yoaE	P0AEC0	0.642	0.126	0.844	FALSE	TRUE	4	UPF0053 inner membrane protein YoaE
ampH	P0AD70	0.646	0.125	0.842	FALSE	TRUE	6	D-alanyl-D-alanine-carboxypeptidase/endopeptidase AmpH
gdhA	P00370	0.651	0.00338	0.000333	FALSE	FALSE	0	NADP-specific glutamate dehydrogenase
pgpC	P0AD42	0.657	3.65e-06	3.86e-06	FALSE	FALSE	0	Phosphatidylglycerophosphatase C
bcsG	P37659	0.663	0.215	0.156	FALSE	TRUE	3	Protein BcsG homolog
tehB	P25397	0.663	0.000822	0.194	FALSE	FALSE	0	Tellurite methyltransferase
ylaC	P0AAS0	0.664	0.00379	0.0653	FALSE	FALSE	0	Inner membrane protein YlaC
arcB	P0AEC3	0.672	0.0003	0.502	FALSE	FALSE	0	Aerobic respiration control sensor protein ArcB
uspF	P37903	0.681	0.00153	0.253	FALSE	FALSE	0	Universal stress protein F
glnL	P0AFB5	0.682	0.00173	0.617	FALSE	FALSE	0	Nitrogen regulation protein NR(II)
ravA	P31473	0.691	0.00574	0.821	FALSE	FALSE	0	ATPase RavA
ycbB	P22525	0.692	0.00138	0.0345	FALSE	FALSE	0	Probable L,D-transpeptidase YcbB
lipA	P60716	0.694	9.55e-05	0.0758	FALSE	FALSE	0	Lipoyl synthase
lexA	P0A7C2	0.695	0.00361	0.422	FALSE	FALSE	0	LexA repressor
phoP	P23836	0.695	1.86e-05	0.000531	FALSE	FALSE	0	Transcriptional regulatory protein PhoP
allE	P75713	0.696	0.00542	0.011	FALSE	TRUE	3	(S)-ureidoglycine aminohydrolase
hisC	P06986	0.711	0.0123	0.385	FALSE	FALSE	0	Histidinol-phosphate aminotransferase
puuE	P50457	0.732	0.218	0.0499	FALSE	TRUE	7	4-aminobutyrate aminotransferase PuuE
glnG	P0AFB8	0.732	0.000998	0.612	FALSE	FALSE	0	Nitrogen regulation protein NR(I)
hisD	P06988	0.732	0.0133	0.576	FALSE	FALSE	0	Histidinol dehydrogenase
pta	P0A9M8	0.741	0.00217	0.63	FALSE	FALSE	0	Phosphate acetyltransferase
folB	P0AC16	0.744	0.259	0.401	FALSE	TRUE	2	Dihydroneopterin aldolase
ftsL	P0AEN4	0.747	0.271	0.797	FALSE	TRUE	1	Cell division protein FtsL
yoaC	P64490	0.757	0.197	0.00489	FALSE	TRUE	6	Uncharacterized protein YoaC
yecA	P0AD05	0.761	0.00064	0.676	FALSE	FALSE	0	Uncharacterized protein YecA
purA	P0A7D4	0.764	0.00159	0.0632	FALSE	FALSE	0	Adenylosuccinate synthetase
dhaM	P37349	0.769	0.000898	0.237	FALSE	FALSE	0	PTS-dependent dihydroxyacetone kinase, phosphotransferase subunit DhaM;Phosphocarrier protein HPr;Phosphotransferase enzyme IIA component
yfeX	P76536	0.778	0.000896	0.531	FALSE	FALSE	0	Probable deferrochelatase/peroxidase YfeX
aspA	P0AC38	0.779	0.00189	0.407	FALSE	FALSE	0	Aspartate ammonia-lyase
hisI	P06989	0.78	0.0083	0.654	FALSE	FALSE	0	Histidine biosynthesis bifunctional protein HisIE;Phosphoribosyl-AMP cyclohydrolase;Phosphoribosyl-ATP pyrophosphatase
rof	P0AFW8	0.782	0.0339	0.958	FALSE	TRUE	1	Protein rof
yegW	P0ACM5	0.795	0.155	0.953	FALSE	TRUE	4	Uncharacterized HTH-type transcriptional regulator YegW
znuA	P39172	0.795	0.414	0.68	FALSE	FALSE	0	High-affinity zinc uptake system protein ZnuA
cydA	P0ABJ9	0.796	0.00298	0.147	FALSE	FALSE	0	Cytochrome bd-I ubiquinol oxidase subunit 1
deaD	P0A9P6	0.796	0.0271	0.00998	FALSE	FALSE	0	ATP-dependent RNA helicase DeaD
frmB	P51025	0.796	0.257	0.403	FALSE	TRUE	9	S-formylglutathione hydrolase FrmB
cydB	P0ABK2	0.801	0.0075	0.12	FALSE	FALSE	0	Cytochrome bd-I ubiquinol oxidase subunit 2
yjhU	P39356	0.827	0.0719	0.301	FALSE	TRUE	1	Uncharacterized transcriptional regulator YjhU
malZ	P21517	0.828	0.0889	0.101	FALSE	TRUE	9	Maltodextrin glucosidase
tus	P16525	0.829	0.224	0.992	FALSE	TRUE	9	DNA replication terminus site-binding protein
dhaK	P76015	0.83	0.0079	0.928	FALSE	FALSE	0	PTS-dependent dihydroxyacetone kinase, dihydroxyacetone-binding subunit DhaK
ilvD	P05791	0.833	0.000642	0.201	FALSE	FALSE	0	Dihydroxy-acid dehydratase
csgG	P0AEA2	0.835	0.0217	0.00227	FALSE	TRUE	6	Curli production assembly/transport component CsgG
csrA	P69913	0.842	0.168	0.266	FALSE	TRUE	2	Carbon storage regulator
shiA	P76350	0.842	0.209	0.706	FALSE	TRUE	6	Shikimate transporter
yafD	P0A8U2	0.846	0.0946	0.161	FALSE	TRUE	2	UPF0294 protein YafD
rnr	P21499	0.855	1.1e-05	0.000228	FALSE	FALSE	0	Ribonuclease R
fruA	P20966	0.856	0.0193	0.393	FALSE	FALSE	0	PTS system fructose-specific EIIBC component;Fructose-specific phosphotransferase enzyme IIB component;Fructose permease IIC component
cptB	P64559	0.858	0.113	0.116	FALSE	FALSE	0	Antitoxin CptB
ydiH	P64476	0.866	0.14	0.0325	FALSE	TRUE	1	Uncharacterized protein YdiH
tabA	P0AF96	0.88	0.000484	0.348	FALSE	FALSE	0	Toxin-antitoxin biofilm protein TabA
asnB	P22106	0.883	7.76e-06	0.0787	FALSE	FALSE	0	Asparagine synthetase B [glutamine-hydrolyzing]
ilvE	P0AB80	0.894	8.07e-05	0.681	FALSE	FALSE	0	Branched-chain-amino-acid aminotransferase
holB	P28631	0.905	0.0151	0.726	FALSE	TRUE	4	DNA polymerase III subunit delta
yebV	P64503	0.909	1.83e-05	0.00043	FALSE	FALSE	0	Uncharacterized protein YebV
yejH	P33919	0.914	0.141	0.824	FALSE	TRUE	9	Uncharacterized protein YejH
phrB	P00914	0.916	0.0686	0.105	FALSE	TRUE	9	Deoxyribodipyrimidine photo-lyase
yedW	P76340	0.921	0.136	0.478	FALSE	TRUE	8	Probable transcriptional regulatory protein YedW
allB	P77671	0.936	0.0842	0.833	FALSE	TRUE	9	Allantoinase
cbl	Q47083	0.949	0.0547	0.758	FALSE	TRUE	1	HTH-type transcriptional regulator cbl
fruK	P0AEW9	0.955	0.0177	0.61	FALSE	FALSE	0	1-phosphofructokinase
ybgA	P24252	0.956	0.375	0.107	FALSE	TRUE	9	Uncharacterized protein YbgA
rnlA	P52129	0.959	0.194	0.619	FALSE	TRUE	8	mRNA endoribonuclease LS
dhaL	P76014	0.964	0.00432	0.469	FALSE	FALSE	0	PTS-dependent dihydroxyacetone kinase, ADP-binding subunit DhaL
hisG	P60757	0.966	0.0172	0.965	FALSE	FALSE	0	ATP phosphoribosyltransferase
ycfP	P0A8E1	0.971	2.64e-06	8.72e-05	FALSE	FALSE	0	UPF0227 protein YcfP
uhpA	P0AGA6	1	0.129	0.0206	FALSE	TRUE	9	Transcriptional regulatory protein UhpA
kgtP	P0AEX3	1	0.12	0.455	FALSE	FALSE	0	Alpha-ketoglutarate permease
cfa	P0A9H7	1.01	0.00283	0.0397	FALSE	FALSE	0	Cyclopropane-fatty-acyl-phospholipid synthase
evgS	P30855	1.02	0.0639	0.193	FALSE	TRUE	10	Sensor protein EvgS
phnA	P0AFJ1	1.02	0.2	0.102	FALSE	FALSE	0	Protein PhnA
yqhA	P67244	1.02	0.191	0.94	FALSE	TRUE	2	UPF0114 protein YqhA
zinT	P76344	1.02	0.518	0.852	FALSE	FALSE	0	Metal-binding protein ZinT
adhE	P0A9Q7	1.03	0.0163	0.232	FALSE	FALSE	0	Aldehyde-alcohol dehydrogenase;Alcohol dehydrogenase;Acetaldehyde dehydrogenase [acetylating];Pyruvate-formate-lyase deactivase
edd	P0ADF6	1.03	0.00177	0.595	FALSE	TRUE	1	Phosphogluconate dehydratase
hybC	P0ACE0	1.03	0.00891	0.269	FALSE	FALSE	0	Hydrogenase-2 large chain
yccJ	P0AB14	1.03	3.75e-05	0.000369	FALSE	FALSE	0	Uncharacterized protein YccJ
yfiB	P07021	1.05	0.0448	0.0329	FALSE	TRUE	9	Putative lipoprotein YfiB
ackA	P0A6A3	1.06	0.00398	0.849	FALSE	FALSE	0	Acetate kinase
rbsA	P04983	1.07	0.00103	0.000471	FALSE	TRUE	4	Ribose import ATP-binding protein RbsA
raiA	P0AD49	1.07	0.000405	0.831	FALSE	FALSE	0	Ribosome-associated inhibitor A
dps	P0ABT2	1.08	3.88e-05	0.00226	FALSE	FALSE	0	DNA protection during starvation protein
clpA	P0ABH9	1.1	2.54e-07	0.00302	FALSE	FALSE	0	ATP-dependent Clp protease ATP-binding subunit ClpA
uspE	P0AAC0	1.11	5.54e-06	0.638	FALSE	FALSE	0	Universal stress protein E
cusB	P77239	1.12	0.472	0.229	FALSE	TRUE	7	Cation efflux system protein CusB
pykA	P21599	1.13	0.000429	0.677	FALSE	FALSE	0	Pyruvate kinase II
znuC	P0A9X1	1.14	0.0753	0.991	FALSE	FALSE	0	Zinc import ATP-binding protein ZnuC
hisM	P0AEU3	1.15	0.136	0.932	FALSE	TRUE	2	Histidine transport system permease protein HisM
rhlE	P25888	1.16	0.000165	0.000473	FALSE	FALSE	0	ATP-dependent RNA helicase RhlE
fruB	P69811	1.16	0.0126	0.844	FALSE	FALSE	0	Multiphosphoryl transfer protein;Phosphocarrier protein HPr;Fructose-specific phosphotransferase enzyme IIA component
rlmA	P36999	1.16	0.118	0.819	FALSE	TRUE	7	23S rRNA (guanine(745)-N(1))-methyltransferase
ynfE	P77374	1.16	0.102	0.827	FALSE	TRUE	5	Putative dimethyl sulfoxide reductase chain YnfE
rpoS	P13445	1.18	0.000328	0.000613	FALSE	FALSE	0	RNA polymerase sigma factor RpoS
ilvA	P04968	1.18	0.000125	0.275	FALSE	FALSE	0	L-threonine dehydratase biosynthetic IlvA
pspC	P0AFN2	1.2	0.00348	0.279	FALSE	TRUE	10	Phage shock protein C
pspE	P23857	1.22	0.0048	0.0029	FALSE	TRUE	3	Thiosulfate sulfurtransferase PspE
rihC	P22564	1.22	0.000328	0.633	FALSE	TRUE	3	Non-specific ribonucleoside hydrolase RihC
yfcL	P64540	1.24	0.169	0.489	FALSE	TRUE	3	Uncharacterized protein YfcL
dgt	P15723	1.25	0.0985	0.874	FALSE	TRUE	3	Deoxyguanosinetriphosphate triphosphohydrolase
gadW	P63201	1.26	0.0333	0.0799	FALSE	TRUE	9	HTH-type transcriptional regulator GadW
ynjE	P78067	1.27	0.139	0.073	FALSE	FALSE	0	Thiosulfate sulfurtransferase YnjE
ydjY	P76220	1.29	0.0709	0.381	FALSE	FALSE	0	Uncharacterized protein YdjY
proP	P0C0L7	1.31	2.15e-05	3.14e-06	FALSE	FALSE	0	Proline/betaine transporter
rraB	P0AF90	1.32	0.000157	0.177	FALSE	FALSE	0	Regulator of ribonuclease activity B
hemF	P36553	1.33	0.0663	0.768	FALSE	TRUE	7	Oxygen-dependent coproporphyrinogen-III oxidase
ydcH	P0ACW6	1.36	0.31	0.851	FALSE	TRUE	7	Uncharacterized protein YdcH
macA	P75830	1.37	0.000338	0.0164	FALSE	TRUE	6	Macrolide export protein MacA
comR	P75952	1.39	0.0315	0.157	FALSE	TRUE	10	HTH-type transcriptional repressor ComR
rmf	P0AFW2	1.39	1.81e-05	0.000695	FALSE	FALSE	0	Ribosome modulation factor
nrdD	P28903	1.47	0.000201	0.0597	FALSE	FALSE	0	Anaerobic ribonucleoside-triphosphate reductase
yacL	P0A8E5	1.48	0.213	0.431	FALSE	TRUE	6	UPF0231 protein YacL
oppA	P23843	1.49	0.00763	0.377	FALSE	FALSE	0	Periplasmic oligopeptide-binding protein
rlmF	P75782	1.49	0.0301	0.921	FALSE	TRUE	1	Ribosomal RNA large subunit methyltransferase F
cusR	P0ACZ8	1.51	0.0464	0.813	FALSE	TRUE	7	Transcriptional regulatory protein CusR
lpxH	P43341	1.51	0.021	0.0677	FALSE	TRUE	8	UDP-2,3-diacylglucosamine hydrolase
ftnB	P0A9A2	1.52	0.000602	0.943	FALSE	TRUE	6	Bacterial non-heme ferritin-like protein
ycbJ	P0AB03	1.54	0.0343	0.974	FALSE	TRUE	6	Uncharacterized protein YcbJ
dgoR	P31460	1.55	0.00387	0.707	FALSE	TRUE	6	Galactonate operon transcriptional repressor
pflB	P09373	1.55	0.0043	0.817	FALSE	FALSE	0	Formate acetyltransferase 1
hypE	P24193	1.57	0.000215	0.304	FALSE	TRUE	3	Hydrogenase isoenzymes formation protein HypE
pepE	P0A7C6	1.57	0.00285	0.237	FALSE	FALSE	0	Peptidase E
yfcG	P77526	1.6	0.0125	0.25	FALSE	TRUE	4	Disulfide-bond oxidoreductase YfcG
yjjA	P18390	1.6	0.271	0.531	FALSE	TRUE	2	Uncharacterized protein YjjA
mnaT	P76112	1.65	0.0371	0.765	FALSE	TRUE	3	L-amino acid N-acyltransferase MnaT
wecA	P0AC78	1.75	0.00842	0.498	FALSE	TRUE	6	Undecaprenyl-phosphate alpha-N-acetylglucosaminyl 1-phosphate transferase
birA	P06709	1.83	0.0241	0.578	FALSE	TRUE	7	Bifunctional ligase/repressor BirA
nirB	P08201	1.83	0.245	0.578	FALSE	TRUE	3	Nitrite reductase (NADH) large subunit
dcuC	P0ABP3	1.86	0.088	0.0958	FALSE	TRUE	4	Anaerobic C4-dicarboxylate transporter DcuC
yaiE	P0C037	1.88	0.121	0.971	FALSE	TRUE	2	UPF0345 protein YaiE
pdhR	P0ACL9	2.07	0.0466	0.466	FALSE	TRUE	2	Pyruvate dehydrogenase complex repressor
yeiE	P0ACR4	2.07	0.0113	0.536	FALSE	TRUE	1	Uncharacterized HTH-type transcriptional regulator YeiE
yedY	P76342	2.09	0.0778	0.156	FALSE	TRUE	6	Sulfoxide reductase catalytic subunit YedY
ybbA	P0A9T8	2.17	0.119	0.956	FALSE	TRUE	4	Uncharacterized ABC transporter ATP-binding protein YbbA
rph	P0CG19	2.37	0.0143	0.618	FALSE	TRUE	5	Inactive ribonuclease PH
grcA	P68066	2.57	0.011	0.98	FALSE	FALSE	0	Autonomous glycyl radical cofactor
moaD	P30748	2.96	0.0117	0.804	FALSE	TRUE	5	Molybdopterin synthase sulfur carrier subunit
ykgM	P0A7N1	2.96	0.156	0.923	FALSE	FALSE	0	50S ribosomal protein L31 type B
ygfB	P0A8C4	3.4	0.047	0.365	FALSE	TRUE	3	UPF0149 protein YgfB
yjjI	P37342	3.92	0.0112	0.821	FALSE	TRUE	3	Uncharacterized protein YjjI
dmsA	P18775	4.02	0.0164	0.991	FALSE	TRUE	3	Dimethyl sulfoxide reductase DmsA
