# Supplementary material for: Periplasm homeostatic regulation maintains spatial constraints essential for cell envelope processes and cell viability
Source: bioRxiv preprint, doi:10.1101/2021.01.13.426498, version 2 (2021-08-31)
Supplement: Supplemental Table S3 [file 426498_file05.xlsx]

## Sheet: EM_supp_table_3
Uniprot	Description	Sequence Length	Taxonomy ID	Class	Species	PFAM	InterPro (Domain)
A0A011MEE9	Root adhesin	200	1454001	Betaproteobacteria	Candidatus Accumulibacter sp. SK-12	PF00691	IPR006664|IPR006665
A0A011MHP9	Inner membrane lipoprotein YiaD	450	1454001	Betaproteobacteria	Candidatus Accumulibacter sp. SK-12	PF00691|PF09850	IPR006665|IPR017732|IPR017733
A0A011MSJ3	Chemotaxis protein MotB	89	1454001	Betaproteobacteria	Candidatus Accumulibacter sp. SK-12	PF00691	IPR006665
A0A011N336	K(+)-insensitive pyrophosphate-energized proton pump	806	1454001	Betaproteobacteria	Candidatus Accumulibacter sp. SK-12	PF00691|PF03030	IPR006665
A0A011N3I1	Inner membrane lipoprotein YiaD	190	1454001	Betaproteobacteria	Candidatus Accumulibacter sp. SK-12	PF00691	IPR006664|IPR006665
A0A011N4D5	Putative outer membrane lipoprotein	148	1454005	Betaproteobacteria	Candidatus Accumulibacter sp. BA-94	PF00691	IPR006665
A0A011NH92	Peptidoglycan-associated lipoprotein	155	1454001	Betaproteobacteria	Candidatus Accumulibacter sp. SK-12	PF00691	IPR006665
A0A011NKG3	Inner membrane lipoprotein YiaD	176	1454001	Betaproteobacteria	Candidatus Accumulibacter sp. SK-12	PF00691	IPR006665
A0A011NNQ6	K(+)-insensitive pyrophosphate-energized proton pump	814	1454004	Betaproteobacteria	Candidatus Accumulibacter sp. BA-93	PF00691|PF03030	IPR006665
A0A011NQG6	Putative outer membrane lipoprotein	567	1454001	Betaproteobacteria	Candidatus Accumulibacter sp. SK-12	PF00691	IPR006664|IPR006665
A0A011NQZ0	Chemotaxis protein MotB	273	1454005	Betaproteobacteria	Candidatus Accumulibacter sp. BA-94	PF00691|PF13677	IPR006665|IPR025713
A0A011NT60	Minor outer membrane protein Omp16	176	1454001	Betaproteobacteria	Candidatus Accumulibacter sp. SK-12	PF00691	IPR006664|IPR006665
A0A011NTI7	Inner membrane lipoprotein YiaD	517	1454004	Betaproteobacteria	Candidatus Accumulibacter sp. BA-93	PF00691|PF13699	IPR006665|IPR025295
A0A011NVV0	Chemotaxis protein MotB	318	1454001	Betaproteobacteria	Candidatus Accumulibacter sp. SK-12	PF00691|PF13677	IPR006665|IPR025713
A0A011NYB7	Peptidoglycan-associated protein	175	1454001	Betaproteobacteria	Candidatus Accumulibacter sp. SK-12	PF00691	IPR006664|IPR006665|IPR014169
A0A011P176	Minor outer membrane protein Omp16	209	1454004	Betaproteobacteria	Candidatus Accumulibacter sp. BA-93	PF00691	IPR006664|IPR006665
A0A011P6C5	Photosystem I P700 chlorophyll a apoprotein A2	228	1454004	Betaproteobacteria	Candidatus Accumulibacter sp. BA-93	PF00691	IPR006665
A0A011P833	Inner membrane lipoprotein YiaD	221	1454004	Betaproteobacteria	Candidatus Accumulibacter sp. BA-93	PF00691|PF13488	IPR006664|IPR006665|IPR039567
A0A011PCA9	Chemotaxis protein MotB	320	1454005	Betaproteobacteria	Candidatus Accumulibacter sp. BA-94	PF00691|PF13677	IPR006665|IPR025713
A0A011PHH6	Peptidoglycan-associated protein	174	1454004	Betaproteobacteria	Candidatus Accumulibacter sp. BA-93	PF00691	IPR006664|IPR006665|IPR014169
A0A011PKS0	Outer membrane protein II	332	1454005	Betaproteobacteria	Candidatus Accumulibacter sp. BA-94	PF00691	IPR006665
A0A011PPB9	Chemotaxis protein MotB	272	1454001	Betaproteobacteria	Candidatus Accumulibacter sp. SK-12	PF00691|PF13677	IPR006665|IPR025713
A0A011PUC3	Chemotaxis protein MotB	217	1454004	Betaproteobacteria	Candidatus Accumulibacter sp. BA-93	PF00691	IPR006665
A0A011PY65	Peptidoglycan-associated protein	175	1454005	Betaproteobacteria	Candidatus Accumulibacter sp. BA-94	PF00691	IPR006664|IPR006665|IPR014169
A0A011PZS0	Outer membrane protein II	109	1454005	Betaproteobacteria	Candidatus Accumulibacter sp. BA-94	PF00691	IPR006664|IPR006665
A0A011Q6E1	Putative outer membrane lipoprotein	567	1454005	Betaproteobacteria	Candidatus Accumulibacter sp. BA-94	PF00691|PF09084	IPR006664|IPR006665|IPR015168
A0A011Q7U1	Outer membrane protein-associated (Lipo)protein	423	1454004	Betaproteobacteria	Candidatus Accumulibacter sp. BA-93	PF00691	IPR006665
A0A011Q7W7	Minor outer membrane protein Omp16	169	1454004	Betaproteobacteria	Candidatus Accumulibacter sp. BA-93	PF00691	IPR006664|IPR006665
A0A011QE02	Root adhesin	197	1454004	Betaproteobacteria	Candidatus Accumulibacter sp. BA-93	PF00691	IPR006664|IPR006665
A0A011QGA5	Outer membrane porin F	222	1454005	Betaproteobacteria	Candidatus Accumulibacter sp. BA-94	PF00691	IPR006664|IPR006665
A0A011QIY8	Chemotaxis protein MotB	320	1454004	Betaproteobacteria	Candidatus Accumulibacter sp. BA-93	PF00691|PF13677	IPR006665|IPR025713
A0A011QJK9	Outer membrane protein II	223	1454004	Betaproteobacteria	Candidatus Accumulibacter sp. BA-93	PF00691	IPR006664|IPR006665
A0A011QKM7	Outer membrane protein II	218	1454004	Betaproteobacteria	Candidatus Accumulibacter sp. BA-93	PF00691	IPR006664|IPR006665
A0A011QQ34	Outer membrane protein-associated (Lipo)protein	414	1454005	Betaproteobacteria	Candidatus Accumulibacter sp. BA-94	PF00691	IPR006665|IPR013026
A0A011QUZ3	Chemotaxis protein MotB	318	1454005	Betaproteobacteria	Candidatus Accumulibacter sp. BA-94	PF00691|PF13677	IPR006665|IPR025713
A0A011QWN2	K(+)-insensitive pyrophosphate-energized proton pump	796	1454005	Betaproteobacteria	Candidatus Accumulibacter sp. BA-94	PF00691|PF03030	IPR006665
A0A011RE59	Chemotaxis protein MotB	282	1454004	Betaproteobacteria	Candidatus Accumulibacter sp. BA-93	PF00691|PF13677	IPR006665|IPR025713
A0A011RFI7	Photosystem I P700 chlorophyll a apoprotein A2	229	1454004	Betaproteobacteria	Candidatus Accumulibacter sp. BA-93	PF00691	IPR006665
A0A011RKW6	Root adhesin	196	1454005	Betaproteobacteria	Candidatus Accumulibacter sp. BA-94	PF00691	IPR006664|IPR006665
A0A011RM46	Chemotaxis protein MotB	272	1454005	Betaproteobacteria	Candidatus Accumulibacter sp. BA-94	PF00691|PF13677	IPR006665|IPR025713
A0A011RNH5	Inner membrane lipoprotein YiaD	177	1454005	Betaproteobacteria	Candidatus Accumulibacter sp. BA-94	PF00691	IPR006665
A0A011RP55	Outer membrane protein II	223	1454005	Betaproteobacteria	Candidatus Accumulibacter sp. BA-94	PF00691	IPR006664|IPR006665
A0A011SRA1	Cell envelope biogenesis protein OmpA	216	69279	Alphaproteobacteria	Aquamicrobium defluvii	PF00691|PF13488	IPR006664|IPR006665|IPR039567
A0A011UDP7	Flagellar motor protein MotB	185	69279	Alphaproteobacteria	Aquamicrobium defluvii	PF00691	IPR006665
A0A011UUI0	Flagellar motor protein MotB	424	69279	Alphaproteobacteria	Aquamicrobium defluvii	PF00691|PF13677	IPR006665|IPR025713
A0A011UW00	Peptidoglycan-associated protein	167	69279	Alphaproteobacteria	Aquamicrobium defluvii	PF00691	IPR006664|IPR006665|IPR014169
A0A011V2X8	Flagellar motor protein MotB	631	69279	Alphaproteobacteria	Aquamicrobium defluvii	PF00691	IPR006665
A0A011VPY8	Uncharacterized protein	343	69279	Alphaproteobacteria	Aquamicrobium defluvii	PF00691	IPR006665
A0A014LVA6	Peptidoglycan-associated protein	171	69222	Gammaproteobacteria	Erwinia mallotivora	PF00691	IPR006664|IPR006665|IPR014169
A0A014MDT9	Flagellar motor protein MotB	346	69222	Gammaproteobacteria	Erwinia mallotivora	PF00691|PF13677	IPR006665|IPR025713
A0A014N2U0	Membrane protein	355	69222	Gammaproteobacteria	Erwinia mallotivora	PF00691|PF01389	IPR000498|IPR006664|IPR006665
A0A014NJW1	Membrane protein	554	69222	Gammaproteobacteria	Erwinia mallotivora	PF00691	IPR006664|IPR006665
A0A014NS56	Uncharacterized protein	492	69222	Gammaproteobacteria	Erwinia mallotivora	PF00691	IPR006664|IPR006665
A0A014PUA4	Uncharacterized protein	411	69222	Gammaproteobacteria	Erwinia mallotivora	PF00691|PF09850	IPR006665|IPR017732|IPR017733
A0A014Q091	Membrane protein	453	69222	Gammaproteobacteria	Erwinia mallotivora	PF00691|PF09850	IPR006665|IPR017732|IPR017733
A0A017HNA9	OmpA/MotB domain protein	232	442562	Alphaproteobacteria	Rubellimicrobium mesophilum DSM 19309	PF00691	IPR006664|IPR006665
A0A017HPS8	Outer membrane protein	354	442562	Alphaproteobacteria	Rubellimicrobium mesophilum DSM 19309	PF00691	IPR006664|IPR006665
A0A017HTD7	Flagellar motor rotation protein MotB	759	442562	Alphaproteobacteria	Rubellimicrobium mesophilum DSM 19309	PF00691	IPR006665
A0A017HTH2	OmpA/MotB domain protein	345	442562	Alphaproteobacteria	Rubellimicrobium mesophilum DSM 19309	PF00691|PF09850	IPR006665|IPR017732
A0A017HTY1	Outer membrane lipoprotein| OmpA family	221	442562	Alphaproteobacteria	Rubellimicrobium mesophilum DSM 19309	PF00691	IPR006664|IPR006665
A0A017HU11	Outer membrane protein	217	442562	Alphaproteobacteria	Rubellimicrobium mesophilum DSM 19309	PF00691|PF13488	IPR006664|IPR006665|IPR039567
A0A017HUK6	OmpA/MotB domain protein	106	442562	Alphaproteobacteria	Rubellimicrobium mesophilum DSM 19309	PF00691	IPR006664|IPR006665
A0A017HUU3	Outer membrane protein A	306	442562	Alphaproteobacteria	Rubellimicrobium mesophilum DSM 19309	PF00691	IPR006664|IPR006665
A0A017HUU6	Peptidoglycan-associated protein	189	442562	Alphaproteobacteria	Rubellimicrobium mesophilum DSM 19309	PF00691	IPR006664|IPR006665|IPR014169
A0A023D130	Peptidoglycan-associated protein	159	1231351	Alphaproteobacteria	Acidomonas methanolica NBRC 104435	PF00691	IPR006664|IPR006665|IPR014169
A0A023D1G5	Uncharacterized protein	133	1231351	Alphaproteobacteria	Acidomonas methanolica NBRC 104435	PF00691	IPR006665
A0A023D2P8	Outer membrane protein OmpA	388	1231351	Alphaproteobacteria	Acidomonas methanolica NBRC 104435	PF00691	IPR006665
A0A023D7V8	Outer membrane protein/flagellar motor protein OmpA/MotB	334	1231351	Alphaproteobacteria	Acidomonas methanolica NBRC 104435	PF00691	IPR006665
A0A023D800	Uncharacterized protein	175	1231351	Alphaproteobacteria	Acidomonas methanolica NBRC 104435	PF00691	IPR006665
A0A023D8L8	Outer membrane protein OmpA/MotB	450	1231351	Alphaproteobacteria	Acidomonas methanolica NBRC 104435	PF00691|PF09850	IPR006665|IPR017732
A0A023DAB1	Outer membrane protein OmpA	379	1231351	Alphaproteobacteria	Acidomonas methanolica NBRC 104435	PF00691	IPR006665
A0A023NN79	Flagellar motor protein MotB	340	1379159	Gammaproteobacteria	Dyella jiangningensis	PF00691|PF13677	IPR006665|IPR025713
A0A023NRW6	Flagellar motor protein MotB	376	1379159	Gammaproteobacteria	Dyella jiangningensis	PF00691|PF13505	IPR006664|IPR006665|IPR027385
A0A023NSK4	Membrane protein	194	1379159	Gammaproteobacteria	Dyella jiangningensis	PF00691	IPR006664|IPR006665
A0A023NSN8	Flagellar motor protein MotB	365	1379159	Gammaproteobacteria	Dyella jiangningensis	PF00691	IPR006664|IPR006665
A0A023NSQ3	Membrane protein	276	1379159	Gammaproteobacteria	Dyella jiangningensis	PF00691|PF04355	IPR006664|IPR006665|IPR007450
A0A023NSQ7	Cell envelope biogenesis protein OmpA	328	1379159	Gammaproteobacteria	Dyella jiangningensis	PF00691|PF16234	IPR006664|IPR006665
A0A023NUC1	Peptidoglycan-associated protein	168	1379159	Gammaproteobacteria	Dyella jiangningensis	PF00691	IPR006664|IPR006665|IPR014169
A0A023NUY8	Membrane protein	256	1379159	Gammaproteobacteria	Dyella jiangningensis	PF00691|PF04355	IPR006664|IPR006665|IPR007450
A0A023NVA7	Flagellar motor protein MotD	185	1379159	Gammaproteobacteria	Dyella jiangningensis	PF00691	IPR006665
A0A023NVJ6	Flagellar motor protein MotD	368	1379159	Gammaproteobacteria	Dyella jiangningensis	PF00691|PF13677	IPR006665|IPR025713
A0A023NVM1	Uncharacterized protein	214	1379159	Gammaproteobacteria	Dyella jiangningensis	PF00691	IPR006665
A0A023NWJ3	Membrane protein	193	1379159	Gammaproteobacteria	Dyella jiangningensis	PF00691	IPR006664|IPR006665
A0A024HD15	Peptidoglycan-associated protein	167	1301098	Gammaproteobacteria	Pseudomonas knackmussii B13	PF00691	IPR006664|IPR006665|IPR014169
A0A024HD58	Uncharacterized protein	335	1301098	Gammaproteobacteria	Pseudomonas knackmussii B13	PF00691|PF18393	IPR006665|IPR041544
A0A024HD87	Uncharacterized protein	169	1301098	Gammaproteobacteria	Pseudomonas knackmussii B13	PF00691	IPR006665
A0A024HDZ1	Uncharacterized protein	209	1301098	Gammaproteobacteria	Pseudomonas knackmussii B13	PF00691	IPR006664|IPR006665
A0A024HEW0	Flagellar motor protein MotD	292	1301098	Gammaproteobacteria	Pseudomonas knackmussii B13	PF00691|PF13677	IPR006665|IPR025713
A0A024HFA1	Outer membrane porin F	353	1301098	Gammaproteobacteria	Pseudomonas knackmussii B13	PF00691|PF05736	IPR006664|IPR006665|IPR008722
A0A024HFS7	Chemotaxis protein lafU	343	1301098	Gammaproteobacteria	Pseudomonas knackmussii B13	PF00691|PF13677	IPR006665|IPR025713
A0A024HIM0	OmpA family protein	460	1301098	Gammaproteobacteria	Pseudomonas knackmussii B13	PF00691|PF12849	IPR006665|IPR024370
A0A024HKU3	OmpA/MotB	269	1301098	Gammaproteobacteria	Pseudomonas knackmussii B13	PF00691|PF14346	IPR006664|IPR006665|IPR025511
A0A024HNG0	Uncharacterized protein	240	1301098	Gammaproteobacteria	Pseudomonas knackmussii B13	PF00691|PF13488	IPR006664|IPR006665|IPR039567
A0A024HPY8	Flagellar motor protein MotB	351	1301098	Gammaproteobacteria	Pseudomonas knackmussii B13	PF00691|PF13677	IPR006665|IPR025713
A0A031MEU9	Peptidoglycan-associated protein	168	653930	Gammaproteobacteria	Pseudomonas bauzanensis	PF00691	IPR006664|IPR006665|IPR014169
A0A031MEX3	Membrane protein	180	653930	Gammaproteobacteria	Pseudomonas bauzanensis	PF00691	IPR006664|IPR006665
A0A031MFK4	Membrane protein	257	653930	Gammaproteobacteria	Pseudomonas bauzanensis	PF00691|PF14346	IPR006664|IPR006665|IPR025511
A0A031MJX2	Membrane protein	217	653930	Gammaproteobacteria	Pseudomonas bauzanensis	PF00691|PF13488	IPR006664|IPR006665|IPR039567
A0A038CSX3	Peptidoglycan-associated protein	174	54291	Gammaproteobacteria	Raoultella ornithinolytica	PF00691	IPR006664|IPR006665|IPR014169
A0A058ZID9	OmpA/MotB domain-containing protein	216	1461693	Alphaproteobacteria	Actibacterium atlanticum	PF00691	IPR006664|IPR006665
A0A058ZIZ6	OmpA domain-containing protein	477	1461693	Alphaproteobacteria	Actibacterium atlanticum	PF00691	IPR006665
A0A058ZJ50	OmpA-like protein	628	1461693	Alphaproteobacteria	Actibacterium atlanticum	PF00691	IPR006664|IPR006665
A0A058ZK14	OmpA-like protein	170	1461693	Alphaproteobacteria	Actibacterium atlanticum	PF00691	IPR006665
A0A058ZL36	OmpA/MotB domain-containing protein	361	1461693	Alphaproteobacteria	Actibacterium atlanticum	PF00691	IPR006665
A0A058ZL63	Kelch motif-containing protein	181	1461693	Alphaproteobacteria	Actibacterium atlanticum	PF00691	IPR006664|IPR006665
A0A058ZMR0	OmpA/MotB protein	517	1461693	Alphaproteobacteria	Actibacterium atlanticum	PF00691|PF12849	IPR006665|IPR024370
A0A058ZN24	Uncharacterized protein	543	1461693	Alphaproteobacteria	Actibacterium atlanticum	PF00691	IPR006665
A0A058ZPB7	Peptidoglycan-associated protein	178	1461693	Alphaproteobacteria	Actibacterium atlanticum	PF00691	IPR006664|IPR006665|IPR014169
A0A058ZQG1	OmpA/MotB protein	221	1461693	Alphaproteobacteria	Actibacterium atlanticum	PF00691	IPR006664|IPR006665
A0A059E1M5	Uncharacterized protein	160	1207058	Alphaproteobacteria	Hyphomonas sp. L-53-1-40	PF00691	IPR006664|IPR006665
A0A059E379	Uncharacterized protein	214	1207058	Alphaproteobacteria	Hyphomonas sp. L-53-1-40	PF00691|PF13488	IPR006664|IPR006665|IPR039567
A0A059E6E5	Uncharacterized protein	284	1207058	Alphaproteobacteria	Hyphomonas sp. L-53-1-40	PF00691|PF13677	IPR006665|IPR025713
A0A059E6J5	Peptidoglycan-associated protein	182	1207058	Alphaproteobacteria	Hyphomonas sp. L-53-1-40	PF00691	IPR006664|IPR006665|IPR014169
A0A059E8N9	Uncharacterized protein	289	1207058	Alphaproteobacteria	Hyphomonas sp. L-53-1-40	PF00691	IPR006664|IPR006665
A0A059E950	Uncharacterized protein	202	1207058	Alphaproteobacteria	Hyphomonas sp. L-53-1-40	PF00691|PF13677	IPR006665|IPR025713
A0A059E959	Uncharacterized protein	381	1207058	Alphaproteobacteria	Hyphomonas sp. L-53-1-40	PF00691	IPR006664|IPR006665
A0A059ECW1	Uncharacterized protein	484	1207058	Alphaproteobacteria	Hyphomonas sp. L-53-1-40	PF00691|PF04972	IPR006664|IPR006665|IPR007055
A0A059EDC3	Uncharacterized protein	119	1207058	Alphaproteobacteria	Hyphomonas sp. L-53-1-40	PF00691	IPR006664|IPR006665
A0A059F740	OmpA family protein	217	1280952	Alphaproteobacteria	Hyphomonas jannaschiana VP2	PF00691|PF13488	IPR006664|IPR006665|IPR039567
A0A059FA29	Putative chemotaxis MotB protein	270	1280952	Alphaproteobacteria	Hyphomonas jannaschiana VP2	PF00691|PF13677	IPR006665|IPR025713
A0A059FB43	OmpA family protein	144	1280952	Alphaproteobacteria	Hyphomonas jannaschiana VP2	PF00691	IPR006664|IPR006665
A0A059FCN7	Peptidoglycan-associated protein	181	1280952	Alphaproteobacteria	Hyphomonas jannaschiana VP2	PF00691	IPR006664|IPR006665|IPR014169
A0A059FCX4	Peptidoglycan-associated protein	174	1280952	Alphaproteobacteria	Hyphomonas jannaschiana VP2	PF00691	IPR006664|IPR006665|IPR014169
A0A059FHL7	Putative chemotaxis protein MotB	215	1280952	Alphaproteobacteria	Hyphomonas jannaschiana VP2	PF00691|PF13677	IPR006665|IPR025713
A0A059FIF0	OmpA family protein	402	1280952	Alphaproteobacteria	Hyphomonas jannaschiana VP2	PF00691	IPR006664|IPR006665
A0A059FIL3	OmpA family protein	290	1280952	Alphaproteobacteria	Hyphomonas jannaschiana VP2	PF00691	IPR006664|IPR006665
A0A059IKQ0	Chemotaxis protein MotB	282	1417296	Alphaproteobacteria	Defluviimonas sp. 20V17	PF00691|PF13677	IPR006665|IPR025713
A0A059IN17	Membrane protein	319	1417296	Alphaproteobacteria	Defluviimonas sp. 20V17	PF00691	IPR006664|IPR006665
A0A059INC8	Cell envelope biogenesis protein OmpA	190	1417296	Alphaproteobacteria	Defluviimonas sp. 20V17	PF00691	IPR006664|IPR006665
A0A059INQ1	Uncharacterized protein	303	1417296	Alphaproteobacteria	Defluviimonas sp. 20V17	PF00691|PF13677	IPR006665|IPR025713
A0A059IP93	Chemotaxis protein MotB	403	1417296	Alphaproteobacteria	Defluviimonas sp. 20V17	PF00691|PF13677	IPR006665|IPR025713
A0A059IPP8	Uncharacterized protein	631	1417296	Alphaproteobacteria	Defluviimonas sp. 20V17	PF00691	IPR006665
A0A059ITE4	Peptidoglycan-associated protein	174	1417296	Alphaproteobacteria	Defluviimonas sp. 20V17	PF00691	IPR006664|IPR006665|IPR014169
A0A059ITM6	Membrane protein	686	1417296	Alphaproteobacteria	Defluviimonas sp. 20V17	PF00691	IPR006664|IPR006665
A0A059ITZ3	Membrane protein	220	1417296	Alphaproteobacteria	Defluviimonas sp. 20V17	PF00691	IPR006664|IPR006665
A0A059IUE1	Membrane protein	219	1417296	Alphaproteobacteria	Defluviimonas sp. 20V17	PF00691	IPR006664|IPR006665
A0A059KIX8	OmpA/MotB domain-containing protein	526	1286631	Betaproteobacteria	Sphaerotilus natans subsp. natans DSM 6575	PF00691|PF12849	IPR006665|IPR024370
A0A059KK28	Uncharacterized protein	353	1286631	Betaproteobacteria	Sphaerotilus natans subsp. natans DSM 6575	PF00691	IPR006664|IPR006665
A0A059KK76	OmpA/MotB domain-containing protein	222	1286631	Betaproteobacteria	Sphaerotilus natans subsp. natans DSM 6575	PF00691|PF13488	IPR006664|IPR006665|IPR039567
A0A059KLM5	Uncharacterized protein	176	1286631	Betaproteobacteria	Sphaerotilus natans subsp. natans DSM 6575	PF00691	IPR006664|IPR006665
A0A059KNA3	OmpA/MotB domain-containing protein	315	1286631	Betaproteobacteria	Sphaerotilus natans subsp. natans DSM 6575	PF00691|PF13677	IPR006665|IPR025713
A0A059KP30	Uncharacterized protein	222	1286631	Betaproteobacteria	Sphaerotilus natans subsp. natans DSM 6575	PF00691	IPR006664|IPR006665
A0A059KRH0	Outer membrane protein| OmpA/MotB family	347	1286631	Betaproteobacteria	Sphaerotilus natans subsp. natans DSM 6575	PF00691	IPR006664|IPR006665
A0A059KRU0	Peptidoglycan-associated protein	187	1286631	Betaproteobacteria	Sphaerotilus natans subsp. natans DSM 6575	PF00691	IPR006664|IPR006665|IPR014169
A0A059KS39	Outer membrane protein| ompa family	161	1286631	Betaproteobacteria	Sphaerotilus natans subsp. natans DSM 6575	PF00691	IPR006664|IPR006665
A0A060NFJ3	Flagellar motor protein	294	1458425	Betaproteobacteria	Serpentinomonas raichei	PF00691|PF13677	IPR006665|IPR025713
A0A060NGY6	Outer membrane protein	648	1458425	Betaproteobacteria	Serpentinomonas raichei	PF00691|PF02321	IPR006664|IPR006665
A0A060NH37	Flagellar motor protein	345	1458425	Betaproteobacteria	Serpentinomonas raichei	PF00691|PF13677	IPR006665|IPR025713
A0A060NHD0	Outer membrane protein and related peptidoglycan-associated (Lipo)protein	238	1458425	Betaproteobacteria	Serpentinomonas raichei	PF00691	IPR006664|IPR006665
A0A060NHR0	Outer membrane protein and related peptidoglycan-associated (Lipo)protein	130	1458425	Betaproteobacteria	Serpentinomonas raichei	PF00691	IPR006664|IPR006665
A0A060NIW1	Outer membrane protein	625	1458425	Betaproteobacteria	Serpentinomonas raichei	PF00691|PF02321	IPR006665
A0A060NKP9	Outer membrane protein and related peptidoglycan-associated (Lipo)protein	221	1458425	Betaproteobacteria	Serpentinomonas raichei	PF00691|PF13488	IPR006664|IPR006665|IPR039567
A0A060NP03	Peptidoglycan-associated protein	206	1458425	Betaproteobacteria	Serpentinomonas raichei	PF00691	IPR006664|IPR006665|IPR014169
A0A060NSP1	Flagellar motor protein	295	1458425	Betaproteobacteria	Serpentinomonas raichei	PF00691|PF13677	IPR006665|IPR017733|IPR025713
A0A061QDJ0	Outer membrane protein	476	1492281	Alphaproteobacteria	alpha proteobacterium Q-1	PF00691|PF13505|PF17963	IPR006664|IPR006665|IPR027385
A0A061QDN0	Motility protein B	334	1492281	Alphaproteobacteria	alpha proteobacterium Q-1	PF00691|PF13677	IPR006665|IPR025713
A0A061QEE3	Peptidoglycan-associated protein	188	1492281	Alphaproteobacteria	alpha proteobacterium Q-1	PF00691	IPR006664|IPR006665|IPR014169
A0A061QGV9	OmpA family protein	221	1492281	Alphaproteobacteria	alpha proteobacterium Q-1	PF00691	IPR006665
A0A061QGX5	Uncharacterized protein	364	1492281	Alphaproteobacteria	alpha proteobacterium Q-1	PF00691	IPR006665
A0A062TSS2	Uncharacterized protein	216	1280941	Alphaproteobacteria	Hyphomonas sp. T16B2	PF00691|PF13488	IPR006664|IPR006665|IPR039567
A0A062TYI7	Peptidoglycan-associated protein	183	1280941	Alphaproteobacteria	Hyphomonas sp. T16B2	PF00691	IPR006664|IPR006665|IPR014169
A0A062TZ50	Uncharacterized protein	156	1280941	Alphaproteobacteria	Hyphomonas sp. T16B2	PF00691	IPR006664|IPR006665
A0A062U0Q4	Uncharacterized protein	484	1280941	Alphaproteobacteria	Hyphomonas sp. T16B2	PF00691|PF04972	IPR006665|IPR007055
A0A062U1D1	Uncharacterized protein	381	1280941	Alphaproteobacteria	Hyphomonas sp. T16B2	PF00691	IPR006664|IPR006665
A0A062U2B3	Uncharacterized protein	385	1280941	Alphaproteobacteria	Hyphomonas sp. T16B2	PF00691|PF13505	IPR006664|IPR006665|IPR027385
A0A062U4N2	Uncharacterized protein	299	1280941	Alphaproteobacteria	Hyphomonas sp. T16B2	PF00691	IPR006664|IPR006665
A0A062U6I2	Uncharacterized protein	286	1280941	Alphaproteobacteria	Hyphomonas sp. T16B2	PF00691|PF13677	IPR006665|IPR025713
A0A062U9T8	Uncharacterized protein	211	1280941	Alphaproteobacteria	Hyphomonas sp. T16B2	PF00691|PF13677	IPR006665|IPR025713
A0A063B683	OmpA/MotB domain protein	219	1192124	Betaproteobacteria	Burkholderia sp. lig30	PF00691	IPR006664|IPR006665
A0A063BCE9	Type IV / VI secretion system protein| DotU family	404	1192124	Betaproteobacteria	Burkholderia sp. lig30	PF00691|PF09850	IPR006665|IPR017732
A0A063BD60	OmpA/MotB domain protein	229	1192124	Betaproteobacteria	Burkholderia sp. lig30	PF00691|PF13677	IPR006664|IPR006665|IPR025713
A0A063BFV3	OmpA/MotB domain protein	215	1192124	Betaproteobacteria	Burkholderia sp. lig30	PF00691	IPR006665
A0A063BGK3	Cytochrome c oxidase subunit 2	517	1192124	Betaproteobacteria	Burkholderia sp. lig30	PF00116|PF00691|PF02790|PF13442	IPR002429|IPR006664|IPR006665|IPR009056|IPR011759|IPR014222
A0A063BHI2	Peptidoglycan-associated protein	169	1192124	Betaproteobacteria	Burkholderia sp. lig30	PF00691	IPR006664|IPR006665|IPR014169
A0A063BHR4	Type IV / VI secretion system protein| DotU family	438	1192124	Betaproteobacteria	Burkholderia sp. lig30	PF00691|PF09850	IPR006665|IPR017732|IPR017733
A0A063BJA3	OmpA/MotB domain protein	212	1192124	Betaproteobacteria	Burkholderia sp. lig30	PF00691|PF13441	IPR006664|IPR006665|IPR027367
A0A063BK59	Type VI secretion system OmpA/MotB family protein	122	1192124	Betaproteobacteria	Burkholderia sp. lig30	PF00691	IPR006665|IPR017733
A0A063BL04	OmpA/MotB domain protein	618	1192124	Betaproteobacteria	Burkholderia sp. lig30	PF00691	IPR006664|IPR006665
A0A063BM93	Type IV / VI secretion system protein| DotU family	439	1192124	Betaproteobacteria	Burkholderia sp. lig30	PF00691|PF09850	IPR006665|IPR017732|IPR017733
A0A063BNG6	Motility protein B| N-terminal domain containing protein	345	1192124	Betaproteobacteria	Burkholderia sp. lig30	PF00691|PF13677	IPR006665|IPR025713
A0A063XY13	Peptidoglycan-associated protein	172	267850	Gammaproteobacteria	Nitrincola lacisaponensis	PF00691	IPR006664|IPR006665|IPR014169
A0A063XZZ4	Outer membrane protein A	323	267850	Gammaproteobacteria	Nitrincola lacisaponensis	PF00691	IPR006664|IPR006665
A0A063Y2G7	Outer membrane lipoprotein omp16	215	267850	Gammaproteobacteria	Nitrincola lacisaponensis	PF00691|PF13488	IPR006664|IPR006665|IPR039567
A0A063Y2Q2	Flagellar motor rotation protein MotB	383	267850	Gammaproteobacteria	Nitrincola lacisaponensis	PF00691	IPR006665
A0A063Y3K2	Flagellar motor rotation protein MotB	309	267850	Gammaproteobacteria	Nitrincola lacisaponensis	PF00691|PF13677	IPR006665|IPR025713
A0A063Y5C1	Outer membrane protein ImpK/VasF| OmpA/MotB domain	432	267850	Gammaproteobacteria	Nitrincola lacisaponensis	PF00691|PF09850	IPR006665|IPR017732|IPR017733
A0A063Y5X4	OmpA domain protein	159	267850	Gammaproteobacteria	Nitrincola lacisaponensis	PF00691	IPR006664|IPR006665
A0A063Y6T6	Outer membrane protein A	197	267850	Gammaproteobacteria	Nitrincola lacisaponensis	PF00691	IPR006664|IPR006665
A0A063Y707	Outer membrane protein A	160	267850	Gammaproteobacteria	Nitrincola lacisaponensis	PF00691	IPR006664|IPR006665
A0A063Y798	Flagellar motor rotation protein MotB	262	267850	Gammaproteobacteria	Nitrincola lacisaponensis	PF00691|PF13677	IPR006665|IPR025713
A0A063Y8H8	Outer membrane lipoprotein omp16	283	267850	Gammaproteobacteria	Nitrincola lacisaponensis	PF00691|PF18393	IPR006665|IPR041544
A0A066UGZ0	Peptidoglycan-associated protein	170	743974	Gammaproteobacteria	Moraxella bovoculi 237	PF00691	IPR006664|IPR006665|IPR014169
A0A066UH80	OmpA/MotB domain protein	309	743974	Gammaproteobacteria	Moraxella bovoculi 237	PF00691|PF04355	IPR006665|IPR007450
A0A066UKP4	OmpA/SmpA/OmlA family outer membrane lipoprotein	102	743974	Gammaproteobacteria	Moraxella bovoculi 237	PF00691	IPR006664|IPR006665
A0A066UMA2	OmpA family protein	552	743974	Gammaproteobacteria	Moraxella bovoculi 237	PF00691	IPR006664|IPR006665
A0A066UN18	OmpA/MotB domain-containing protein	219	743974	Gammaproteobacteria	Moraxella bovoculi 237	PF00691|PF13441	IPR006664|IPR006665|IPR027367
A0A066UN79	Membrane protein	208	212667	Gammaproteobacteria	Vibrio fortis	PF00691	IPR006664|IPR006665
A0A066UPQ5	Outer membrane protein CD	438	743974	Gammaproteobacteria	Moraxella bovoculi 237	PF00691|PF13505	IPR006664|IPR006665|IPR027385
A0A066URE5	Membrane protein	277	212667	Gammaproteobacteria	Vibrio fortis	PF00691	IPR006664|IPR006665
A0A066UTW8	Membrane protein	358	212667	Gammaproteobacteria	Vibrio fortis	PF00691|PF01389	IPR000498|IPR006664|IPR006665
A0A066UUH3	Flagellar protein MotY	293	212667	Gammaproteobacteria	Vibrio fortis	PF00691|PF18393	IPR006665|IPR041544
A0A066UVJ8	Flagellar motor protein MotB	316	212667	Gammaproteobacteria	Vibrio fortis	PF00691|PF13677	IPR006665|IPR025713
A0A066UWI3	Membrane protein	222	212667	Gammaproteobacteria	Vibrio fortis	PF00691|PF13488	IPR006664|IPR006665|IPR039567
A0A066UZY1	Membrane protein	202	212667	Gammaproteobacteria	Vibrio fortis	PF00691	IPR006664|IPR006665
A0A066V0V8	Membrane protein	205	212667	Gammaproteobacteria	Vibrio fortis	PF00691	IPR006664|IPR006665
A0A066V1C6	Peptidoglycan-associated protein	180	212667	Gammaproteobacteria	Vibrio fortis	PF00691	IPR006664|IPR006665|IPR014169
A0A068QQH0	Peptidoglycan-associated protein	167	351671	Gammaproteobacteria	Xenorhabdus doucetiae	PF00691	IPR006664|IPR006665|IPR014169
A0A068QRI1	Uncharacterized protein	405	351671	Gammaproteobacteria	Xenorhabdus doucetiae	PF00691|PF09850	IPR006665|IPR017732|IPR017733
A0A068QRS1	Outer membrane protein A	374	351671	Gammaproteobacteria	Xenorhabdus doucetiae	PF00691|PF01389	IPR000498|IPR006664|IPR006665
A0A068QSK4	Uncharacterized protein	407	351671	Gammaproteobacteria	Xenorhabdus doucetiae	PF00691|PF09850	IPR006665|IPR017732|IPR017733
A0A068QTE2	Motility protein B	337	351671	Gammaproteobacteria	Xenorhabdus doucetiae	PF00691|PF13677	IPR006665|IPR025713
A0A068QTF6	Putative lipoprotein yfiB	161	351671	Gammaproteobacteria	Xenorhabdus doucetiae	PF00691	IPR006664|IPR006665
A0A068YHM3	Uncharacterized protein	443	1504672	Betaproteobacteria	Polaromonas sp. CG9_12	PF00691	IPR006665
A0A068YIG7	Peptidoglycan-associated protein	182	1504672	Betaproteobacteria	Polaromonas sp. CG9_12	PF00691	IPR006664|IPR006665
A0A068YJ45	Outer membrane protein A	212	1504672	Betaproteobacteria	Polaromonas sp. CG9_12	PF00691	IPR006664|IPR006665
A0A068YLB5	Outer membrane protein ImpK/VasF| OmpA/MotB domain	437	1504672	Betaproteobacteria	Polaromonas sp. CG9_12	PF00691|PF09850	IPR006665|IPR017732|IPR017733
A0A068YNE4	Flagellar motor rotation protein MotB	313	1504672	Betaproteobacteria	Polaromonas sp. CG9_12	PF00691|PF13677	IPR006665|IPR025713
A0A068YR49	Outer membrane protein A	379	1504672	Betaproteobacteria	Polaromonas sp. CG9_12	PF00691|PF13505	IPR006664|IPR006665|IPR027385
A0A068YSQ8	Flagellar motor rotation protein MotB	288	1504672	Betaproteobacteria	Polaromonas sp. CG9_12	PF00691|PF13677	IPR006665|IPR025713
A0A068YVF9	Outer membrane lipoprotein omp16	196	1504672	Betaproteobacteria	Polaromonas sp. CG9_12	PF00691|PF13488	IPR006664|IPR006665|IPR039567
A0A068Z061	Cytochrome c oxidase polypeptide II	182	1504672	Betaproteobacteria	Polaromonas sp. CG9_12	PF00691	IPR006665
A0A069N8J2	Flagellar motor protein MotB	269	1071679	Betaproteobacteria	Caballeronia grimmiae	PF00691	IPR006665
A0A069NES1	Peptidoglycan-associated protein	168	1071679	Betaproteobacteria	Caballeronia grimmiae	PF00691	IPR006664|IPR006665|IPR014169
A0A069NHX3	Flagellar motor protein MotB	166	1071679	Betaproteobacteria	Caballeronia grimmiae	PF00691	IPR006664|IPR006665
A0A069NK43	Membrane protein	174	1071679	Betaproteobacteria	Caballeronia grimmiae	PF00691	IPR006664|IPR006665
A0A069NKQ5	Flagellar motor protein MotB	615	1071679	Betaproteobacteria	Caballeronia grimmiae	PF00691	IPR006665
A0A069NT13	Membrane protein	231	1071679	Betaproteobacteria	Caballeronia grimmiae	PF00691	IPR006664|IPR006665
A0A069NYL1	Uncharacterized protein	318	1071679	Betaproteobacteria	Caballeronia grimmiae	PF00691|PF09850	IPR006665|IPR017732|IPR017733
A0A069P450	Flagellar motor protein MotB	435	1071679	Betaproteobacteria	Caballeronia grimmiae	PF00691|PF09850	IPR006665|IPR017732|IPR017733
A0A069P5D7	Flagellar motor protein MotB	571	1071679	Betaproteobacteria	Caballeronia grimmiae	PF00691|PF06078	IPR006664|IPR006665
A0A069P6F8	Cytochrome c oxidase subunit 2	543	1071679	Betaproteobacteria	Caballeronia grimmiae	PF00116|PF00691|PF02790|PF13442	IPR002429|IPR006664|IPR006665|IPR009056|IPR011759|IPR014222
A0A069P7A0	Membrane protein	218	1071679	Betaproteobacteria	Caballeronia grimmiae	PF00691|PF13441	IPR006664|IPR006665|IPR027367
A0A069PCU4	Flagellar motor protein MotB	321	60547	Betaproteobacteria	Caballeronia glathei	PF00691|PF13677	IPR006665|IPR025713
A0A069PDD2	Uncharacterized protein	448	60547	Betaproteobacteria	Caballeronia glathei	PF00691	IPR006665
A0A069PFN4	Membrane protein	167	60547	Betaproteobacteria	Caballeronia glathei	PF00691	IPR006664|IPR006665
A0A069PHL8	Uncharacterized protein	215	1071679	Betaproteobacteria	Caballeronia grimmiae	PF00691	IPR006665
A0A069PJ48	Membrane protein	221	1071679	Betaproteobacteria	Caballeronia grimmiae	PF00691	IPR006664|IPR006665
A0A069PJ57	Membrane protein	218	60547	Betaproteobacteria	Caballeronia glathei	PF00691	IPR006664|IPR006665
A0A069PJG5	Flagellar motor protein MotB	367	60547	Betaproteobacteria	Caballeronia glathei	PF00691|PF13677	IPR006665|IPR025713
A0A069PJY4	Flagellar motor protein MotB	549	60547	Betaproteobacteria	Caballeronia glathei	PF00691|PF06078	IPR006664|IPR006665
A0A069PKV8	Flagellar motor protein MotB	230	60547	Betaproteobacteria	Caballeronia glathei	PF00691	IPR006664|IPR006665
A0A069PLP7	Uncharacterized protein	557	60547	Betaproteobacteria	Caballeronia glathei	PF00691	IPR006665
A0A069PM24	Uncharacterized protein	215	60547	Betaproteobacteria	Caballeronia glathei	PF00691	IPR006665
A0A069PMK4	Flagellar motor protein MotB	547	60547	Betaproteobacteria	Caballeronia glathei	PF00691	IPR006664|IPR006665
A0A069PMS6	Uncharacterized protein	440	60547	Betaproteobacteria	Caballeronia glathei	PF00691|PF09850	IPR006665|IPR017732|IPR017733
A0A069PTE6	Flagellar motor protein MotB	354	60547	Betaproteobacteria	Caballeronia glathei	PF00691	IPR006664|IPR006665
A0A069PUG0	Membrane protein	218	60547	Betaproteobacteria	Caballeronia glathei	PF00691|PF13441	IPR006664|IPR006665|IPR027367
A0A069Q4K2	Peptidoglycan-associated protein	170	60547	Betaproteobacteria	Caballeronia glathei	PF00691	IPR006664|IPR006665|IPR014169
A0A069Q522	Cytochrome c oxidase subunit 2	540	60547	Betaproteobacteria	Caballeronia glathei	PF00116|PF00691|PF02790|PF13442	IPR002429|IPR006664|IPR006665|IPR009056|IPR011759|IPR014222
A0A071LAH4	Flagellar motor protein MotB	336	202	Epsilonproteobacteria	Campylobacter mucosalis	PF00691	IPR006664|IPR006665
A0A071LCD8	Peptidoglycan-associated protein	165	202	Epsilonproteobacteria	Campylobacter mucosalis	PF00691	IPR006664|IPR006665
A0A071LD74	Chemotaxis protein MotB	353	202	Epsilonproteobacteria	Campylobacter mucosalis	PF00691	IPR006665
A0A071LDY0	Flagellar motor protein MotB	257	202	Epsilonproteobacteria	Campylobacter mucosalis	PF00691|PF13677	IPR006665|IPR025713
A0A073ID24	Membrane protein	227	1300350	Alphaproteobacteria	Sulfitobacter donghicola DSW-25 = KCTC 12864 = JCM	PF00691	IPR006664|IPR006665
A0A073IE59	Uncharacterized protein	515	1300350	Alphaproteobacteria	Sulfitobacter donghicola DSW-25 = KCTC 12864 = JCM	PF00691|PF12849	IPR006664|IPR006665|IPR024370
A0A073IEB9	Cell envelope biogenesis protein OmpA	191	1300350	Alphaproteobacteria	Sulfitobacter donghicola DSW-25 = KCTC 12864 = JCM	PF00691	IPR006665
A0A073IEG3	Membrane protein	632	1300350	Alphaproteobacteria	Sulfitobacter donghicola DSW-25 = KCTC 12864 = JCM	PF00691	IPR006664|IPR006665
A0A073IFF2	Peptidoglycan-associated protein	174	1300350	Alphaproteobacteria	Sulfitobacter donghicola DSW-25 = KCTC 12864 = JCM	PF00691	IPR006664|IPR006665|IPR014169
A0A073IH07	Flagellar motor protein	611	1300350	Alphaproteobacteria	Sulfitobacter donghicola DSW-25 = KCTC 12864 = JCM	PF00691	IPR006665
A0A073IJS7	Chemotaxis protein MotB	281	1300350	Alphaproteobacteria	Sulfitobacter donghicola DSW-25 = KCTC 12864 = JCM	PF00691|PF13677	IPR006665|IPR025713
A0A073IKK7	Membrane protein	225	1300350	Alphaproteobacteria	Sulfitobacter donghicola DSW-25 = KCTC 12864 = JCM	PF00691|PF13488	IPR006664|IPR006665|IPR039567
A0A073IM87	Cell envelope biogenesis protein OmpA	309	1300350	Alphaproteobacteria	Sulfitobacter donghicola DSW-25 = KCTC 12864 = JCM	PF00691	IPR006664|IPR006665
A0A073IMV7	Uncharacterized protein	639	1300350	Alphaproteobacteria	Sulfitobacter donghicola DSW-25 = KCTC 12864 = JCM	PF00691	IPR006664|IPR006665
A0A073IX57	Membrane protein	222	1402135	Alphaproteobacteria	Sulfitobacter pseudonitzschiae	PF00691|PF13488	IPR006664|IPR006665|IPR039567
A0A073IZ67	Cell envelope biogenesis protein OmpA	522	1300350	Alphaproteobacteria	Sulfitobacter donghicola DSW-25 = KCTC 12864 = JCM	PF00691|PF12849	IPR006665|IPR024370
A0A073IZ85	Cell envelope biogenesis protein OmpA	314	1402135	Alphaproteobacteria	Sulfitobacter pseudonitzschiae	PF00691	IPR006664|IPR006665
A0A073J103	Membrane protein	226	1402135	Alphaproteobacteria	Sulfitobacter pseudonitzschiae	PF00691	IPR006664|IPR006665
A0A073J235	Flagellar motor protein	687	1402135	Alphaproteobacteria	Sulfitobacter pseudonitzschiae	PF00691	IPR006665
A0A073J298	Membrane protein	645	1402135	Alphaproteobacteria	Sulfitobacter pseudonitzschiae	PF00691	IPR006664|IPR006665
A0A073J2P6	Peptidoglycan-associated protein	173	1402135	Alphaproteobacteria	Sulfitobacter pseudonitzschiae	PF00691	IPR006664|IPR006665|IPR014169
A0A073J3L4	Cell envelope biogenesis protein OmpA	178	1402135	Alphaproteobacteria	Sulfitobacter pseudonitzschiae	PF00691	IPR006665
A0A073J5I2	Cell envelope biogenesis protein OmpA	519	1402135	Alphaproteobacteria	Sulfitobacter pseudonitzschiae	PF00691|PF12849	IPR006665|IPR024370
A0A073J7R1	Uncharacterized protein	675	1402135	Alphaproteobacteria	Sulfitobacter pseudonitzschiae	PF00691	IPR006665
A0A074J6T0	Uncharacterized protein	678	1353528	Alphaproteobacteria	Thioclava indica	PF00691	IPR006664|IPR006665|IPR007055
A0A074J9N1	Uncharacterized protein	317	1353528	Alphaproteobacteria	Thioclava indica	PF00691	IPR006664|IPR006665
A0A074JBB9	Uncharacterized protein	226	1353528	Alphaproteobacteria	Thioclava indica	PF00691|PF13488	IPR006664|IPR006665|IPR039567
A0A074JLZ4	Peptidoglycan-associated protein	174	1353528	Alphaproteobacteria	Thioclava indica	PF00691	IPR006664|IPR006665|IPR014169
A0A074JN93	Uncharacterized protein	219	1353528	Alphaproteobacteria	Thioclava indica	PF00691	IPR006664|IPR006665
A0A074JSP6	Uncharacterized protein	463	1353528	Alphaproteobacteria	Thioclava indica	PF00691	IPR006665
A0A074JZ79	Uncharacterized protein	186	1353528	Alphaproteobacteria	Thioclava indica	PF00691	IPR006665
A0A074M348	Flagellar motor protein MotB	376	1044	Alphaproteobacteria	Erythrobacter longus	PF00691|PF13505	IPR006664|IPR006665|IPR027385
A0A074M3S4	Flagellar motor protein	323	1044	Alphaproteobacteria	Erythrobacter longus	PF00691|PF13677	IPR006665|IPR025713
A0A074M7Z0	Membrane protein	231	1044	Alphaproteobacteria	Erythrobacter longus	PF00691|PF13488	IPR006664|IPR006665|IPR039567
A0A074M9X6	Flagellar motor protein MotB	375	1044	Alphaproteobacteria	Erythrobacter longus	PF00691|PF13505	IPR006664|IPR006665|IPR027385
A0A074MB39	Uncharacterized protein	209	1044	Alphaproteobacteria	Erythrobacter longus	PF00691	IPR006665
A0A074MCH3	Uncharacterized protein	196	1044	Alphaproteobacteria	Erythrobacter longus	PF00691	IPR006665
A0A074MJX8	Peptidoglycan-associated protein	176	1044	Alphaproteobacteria	Erythrobacter longus	PF00691	IPR006664|IPR006665|IPR014169
A0A074MTX6	OmpA family protein	325	1044	Alphaproteobacteria	Erythrobacter longus	PF00691	IPR006664|IPR006665
A0A075MJ19	Flagellar motor protein MotB	318	86106	Alphaproteobacteria	endosymbiont of Acanthamoeba sp. UWC8	PF00691|PF13677	IPR006665|IPR025713
A0A075MLL7	Peptidoglycan-associated protein	154	86106	Alphaproteobacteria	endosymbiont of Acanthamoeba sp. UWC8	PF00691	IPR006664|IPR006665|IPR014169
A0A075MMK8	OmpA/MotB	203	86106	Alphaproteobacteria	endosymbiont of Acanthamoeba sp. UWC8	PF00691	IPR006664|IPR006665
A0A075NX50	Channel protein TolC	649	589873	Gammaproteobacteria	Alteromonas australica	PF00691|PF02321	IPR006664|IPR006665
A0A075NXQ8	Membrane protein	290	589873	Gammaproteobacteria	Alteromonas australica	PF00691|PF18393	IPR006664|IPR006665|IPR041544
A0A075NXX6	Peptidoglycan-associated protein	188	589873	Gammaproteobacteria	Alteromonas australica	PF00691	IPR006664|IPR006665|IPR014169
A0A075P0S4	Flagellar motor protein MotB	309	589873	Gammaproteobacteria	Alteromonas australica	PF00691|PF13677	IPR006665|IPR025713
A0A075P3F4	Flagellar motor protein MotB	399	589873	Gammaproteobacteria	Alteromonas australica	PF00691|PF02412	IPR006664|IPR006665
A0A075P4M5	Membrane protein	213	589873	Gammaproteobacteria	Alteromonas australica	PF00691|PF13488	IPR006664|IPR006665|IPR039567
A0A075P9S9	Flagellar motor protein MotB	589	589873	Gammaproteobacteria	Alteromonas australica	PF00691	IPR006665
A0A076JW69	Putative| OmpA-like protein	715	666509	Alphaproteobacteria	Planktomarina temperata RCA23	PF00691|PF04972	IPR006665|IPR007055
A0A076JWF4	Inner membrane lipoprotein YiaD	180	666509	Alphaproteobacteria	Planktomarina temperata RCA23	PF00691|PF13488	IPR006664|IPR006665|IPR039567
A0A076JWN5	Chemotaxis protein MotB	407	666509	Alphaproteobacteria	Planktomarina temperata RCA23	PF00691|PF13677	IPR006665|IPR025713
A0A076JXW1	Uncharacterized protein	628	666509	Alphaproteobacteria	Planktomarina temperata RCA23	PF00691	IPR006664|IPR006665
A0A076K016	Peptidoglycan-associated protein	166	666509	Alphaproteobacteria	Planktomarina temperata RCA23	PF00691	IPR006664|IPR006665|IPR014169
A0A076K0M5	Uncharacterized protein	280	666509	Alphaproteobacteria	Planktomarina temperata RCA23	PF00691	IPR006664|IPR006665
A0A076K1Y4	Uncharacterized protein	747	666509	Alphaproteobacteria	Planktomarina temperata RCA23	PF00691	IPR006665
A0A077AUG5	OmpA/MotB	152	91604	Alphaproteobacteria	Candidatus Paracaedibacter acanthamoebae	PF00691	IPR006664|IPR006665
A0A077C1Q8	Peptidoglycan-associated protein	155	244581	Alphaproteobacteria	Candidatus Paracaedimonas acanthamoebae	PF00691	IPR006664|IPR006665|IPR014169
A0A077DFI2	Membrane protein	179	1072685	Betaproteobacteria	Basilea psittacipulmonis DSM 24701	PF00691	IPR006664|IPR006665
A0A077DGX1	Uncharacterized protein	222	1072685	Betaproteobacteria	Basilea psittacipulmonis DSM 24701	PF00691	IPR006665
A0A077DI94	Peptidoglycan-associated protein	163	1072685	Betaproteobacteria	Basilea psittacipulmonis DSM 24701	PF00691	IPR006664|IPR006665
A0A077FKG7	Chemotaxis protein MotB	289	1528098	Alphaproteobacteria	Rickettsiales bacterium Ac37b	PF00691|PF13677	IPR006665|IPR025713
A0A077FLY2	OmpA family protein	291	1528098	Alphaproteobacteria	Rickettsiales bacterium Ac37b	PF00691	IPR006665
A0A077FMR4	Peptidoglycan-associated protein	160	1528098	Alphaproteobacteria	Rickettsiales bacterium Ac37b	PF00691	IPR006664|IPR006665|IPR014169
A0A077FQ86	Outer membrane protein	269	1528098	Alphaproteobacteria	Rickettsiales bacterium Ac37b	PF00691	IPR006664|IPR006665
A0A078LL08	OmpA family protein	456	1499686	Gammaproteobacteria	Pseudomonas saudiphocaensis	PF00691|PF12849	IPR006665|IPR024370
A0A078LNC4	OmpA family protein	267	1499686	Gammaproteobacteria	Pseudomonas saudiphocaensis	PF00691|PF14346	IPR006664|IPR006665|IPR025511
A0A078LRD3	Flagellar motor protein MotD	261	1499686	Gammaproteobacteria	Pseudomonas saudiphocaensis	PF00691|PF13677	IPR006665|IPR025713
A0A078LSH4	Outer membrane protein	211	1499686	Gammaproteobacteria	Pseudomonas saudiphocaensis	PF00691	IPR006664|IPR006665
A0A078LT54	DUF4398 domain-containing protein	267	1499686	Gammaproteobacteria	Pseudomonas saudiphocaensis	PF00691|PF14346	IPR006664|IPR006665|IPR025511
A0A078LTL2	Flagellar motor protein MotB	332	1499686	Gammaproteobacteria	Pseudomonas saudiphocaensis	PF00691|PF13677	IPR006665|IPR025713
A0A078LTL4	Peptidoglycan-associated protein	167	1499686	Gammaproteobacteria	Pseudomonas saudiphocaensis	PF00691	IPR006664|IPR006665|IPR014169
A0A078LUP5	Outer membrane protein OprF	329	1499686	Gammaproteobacteria	Pseudomonas saudiphocaensis	PF00691|PF05736	IPR006664|IPR006665|IPR008722
A0A078LVX9	OmpA/MotB domain-containing protein	297	1499686	Gammaproteobacteria	Pseudomonas saudiphocaensis	PF00691|PF13677	IPR006665|IPR025713
A0A078LWF8	Putative outer membrane protein	206	1499686	Gammaproteobacteria	Pseudomonas saudiphocaensis	PF00691	IPR006665
A0A078LXU6	Outer membrane protein	297	1499686	Gammaproteobacteria	Pseudomonas saudiphocaensis	PF00691|PF18393	IPR006664|IPR006665|IPR041544
A0A078LY39	Glycine zipper 2TM domain-containing protein	217	1499686	Gammaproteobacteria	Pseudomonas saudiphocaensis	PF00691|PF13488	IPR006664|IPR006665|IPR039567
A0A078LYV9	Outer membrane protein	189	1499686	Gammaproteobacteria	Pseudomonas saudiphocaensis	PF00691	IPR006664|IPR006665
A0A080JWZ0	Outer membrane protein or related peptidoglycan-associated (Lipo)protein	231	1443103	Betaproteobacteria	Snodgrassella alvi SCGC AB-598-O02	PF00691	IPR006664|IPR006665
A0A080KDD5	Peptidoglycan-associated protein	158	1445514	Gammaproteobacteria	Gilliamella apicola SCGC AB-598-I20	PF00691	IPR006664|IPR006665|IPR014169
A0A080KI29	Outer membrane protein or related peptidoglycan-associated (Lipo)protein	368	1445514	Gammaproteobacteria	Gilliamella apicola SCGC AB-598-I20	PF00691|PF01389	IPR000498|IPR006664|IPR006665
A0A080KIX6	Flagellar motor protein	298	1445514	Gammaproteobacteria	Gilliamella apicola SCGC AB-598-I20	PF00691|PF13677	IPR006665|IPR025713
A0A080LTR9	Outer membrane protein-associated (Lipo)protein	400	1454002	Betaproteobacteria	Candidatus Accumulibacter sp. BA-91	PF00691	IPR006665
A0A080LTS6	Outer membrane protein II	131	1454002	Betaproteobacteria	Candidatus Accumulibacter sp. BA-91	PF00691	IPR006664|IPR006665
A0A080LTV1	Minor outer membrane protein Omp16	91	1454002	Betaproteobacteria	Candidatus Accumulibacter sp. BA-91	PF00691	IPR006664|IPR006665
A0A080LXN5	Outer membrane protein II	96	1454002	Betaproteobacteria	Candidatus Accumulibacter sp. BA-91	PF00691	IPR006664|IPR006665
A0A080LZ59	Peptidoglycan-associated protein	176	1454002	Betaproteobacteria	Candidatus Accumulibacter sp. BA-91	PF00691	IPR006664|IPR006665|IPR014169
A0A080M0T7	Minor outer membrane protein Omp16	205	1454002	Betaproteobacteria	Candidatus Accumulibacter sp. BA-91	PF00691	IPR006664|IPR006665
A0A080M5L4	Inner membrane lipoprotein YiaD	225	1454002	Betaproteobacteria	Candidatus Accumulibacter sp. BA-91	PF00691	IPR006665
A0A080M6R0	Chemotaxis protein MotB	259	1454002	Betaproteobacteria	Candidatus Accumulibacter sp. BA-91	PF00691|PF13677	IPR006665|IPR025713
A0A080MB69	Inner membrane lipoprotein YiaD	184	1454002	Betaproteobacteria	Candidatus Accumulibacter sp. BA-91	PF00691	IPR006664|IPR006665
A0A081B7R9	OmpA/MotB	495	1333998	Alphaproteobacteria	Tepidicaulis marinus	PF00691	IPR006665
A0A081B7X0	OmpA/MotB domain-containing protein	318	1333998	Alphaproteobacteria	Tepidicaulis marinus	PF00691|PF13677	IPR006665|IPR025713
A0A081BA81	OmpA/MotB domain-containing protein	215	1333998	Alphaproteobacteria	Tepidicaulis marinus	PF00691|PF13488	IPR006664|IPR006665|IPR039567
A0A081BAM9	OmpA/MotB domain-containing protein	158	1333998	Alphaproteobacteria	Tepidicaulis marinus	PF00691	IPR006664|IPR006665
A0A081BB55	Chemotaxis protein	391	1333998	Alphaproteobacteria	Tepidicaulis marinus	PF00691|PF13677	IPR006665|IPR025713
A0A081BC92	OmpA/MotB domain-containing protein	280	1333998	Alphaproteobacteria	Tepidicaulis marinus	PF00691	IPR006664|IPR006665
A0A081BDC9	OmpA/MotB	312	1333998	Alphaproteobacteria	Tepidicaulis marinus	PF00691	IPR006664|IPR006665
A0A081BET9	Peptidoglycan-associated protein	173	1333998	Alphaproteobacteria	Tepidicaulis marinus	PF00691	IPR006664|IPR006665|IPR014169
A0A081BEW4	Lysophospholipase	290	1333998	Alphaproteobacteria	Tepidicaulis marinus	PF00691	IPR006665
A0A081BEW6	OmpA/MotB domain-containing protein	337	1333998	Alphaproteobacteria	Tepidicaulis marinus	PF00691	IPR006665
A0A081FU49	Peptidoglycan-associated protein	173	1232683	Gammaproteobacteria	Marinobacterium sp. AK27	PF00691	IPR006664|IPR006665|IPR014169
A0A081FUG9	Outer membrane protein A	235	1232683	Gammaproteobacteria	Marinobacterium sp. AK27	PF00691	IPR006664|IPR006665
A0A081FXE0	Outer membrane lipoprotein omp16	303	1232683	Gammaproteobacteria	Marinobacterium sp. AK27	PF00691|PF18393	IPR006664|IPR006665|IPR041544
A0A081G0H5	Flagellar motor rotation protein MotB	301	1232683	Gammaproteobacteria	Marinobacterium sp. AK27	PF00691|PF13677	IPR006665|IPR025713
A0A081G0T1	Outer membrane lipoprotein omp16	220	1232683	Gammaproteobacteria	Marinobacterium sp. AK27	PF00691|PF13488	IPR006664|IPR006665|IPR039567
A0A081G0W5	Phosphate ABC transporter| periplasmic phosphate-binding protein PstS	589	1232683	Gammaproteobacteria	Marinobacterium sp. AK27	PF00691|PF12849	IPR006665|IPR024370
A0A081G113	Outer membrane protein A	186	1232683	Gammaproteobacteria	Marinobacterium sp. AK27	PF00691	IPR006664|IPR006665
A0A081G2M9	Flagellar motor rotation protein MotB	308	1232683	Gammaproteobacteria	Marinobacterium sp. AK27	PF00691|PF13677	IPR006665|IPR025713
A0A081G3U0	Outer membrane protein A	200	1232683	Gammaproteobacteria	Marinobacterium sp. AK27	PF00691	IPR006664|IPR006665
A0A081K8E7	Membrane protein	219	305900	Gammaproteobacteria	Endozoicomonas elysicola	PF00691|PF13488	IPR006664|IPR006665|IPR039567
A0A081KE33	Peptidoglycan-associated protein	186	305900	Gammaproteobacteria	Endozoicomonas elysicola	PF00691	IPR006664|IPR006665
A0A081LLH9	OmpA family lipoprotein	218	648	Gammaproteobacteria	Aeromonas caviae	PF00691|PF13488	IPR006664|IPR006665|IPR039567
A0A081LSP1	Peptidoglycan-associated protein	174	648	Gammaproteobacteria	Aeromonas caviae	PF00691	IPR006664|IPR006665|IPR014169
A0A081N7E4	Uncharacterized protein	247	1027273	Gammaproteobacteria	Endozoicomonas montiporae	PF00691|PF13677	IPR006665|IPR025713
A0A081N8A6	Uncharacterized protein	199	1027273	Gammaproteobacteria	Endozoicomonas montiporae	PF00691	IPR006664|IPR006665
A0A081N8R5	Membrane protein	219	1027273	Gammaproteobacteria	Endozoicomonas montiporae	PF00691|PF13488	IPR006664|IPR006665|IPR039567
A0A081N9X4	Peptidoglycan-associated protein	190	1027273	Gammaproteobacteria	Endozoicomonas montiporae	PF00691	IPR006664|IPR006665
A0A081NC54	Uncharacterized protein	268	1027273	Gammaproteobacteria	Endozoicomonas montiporae	PF00691	IPR006664|IPR006665
A0A081NCA0	Uncharacterized protein	315	1027273	Gammaproteobacteria	Endozoicomonas montiporae	PF00691|PF13677	IPR006665|IPR025713
A0A081ND45	Uncharacterized protein	290	1137799	Gammaproteobacteria	Endozoicomonas numazuensis	PF00691|PF18393	IPR006664|IPR006665|IPR041544
A0A081NDC3	Uncharacterized protein	356	1137799	Gammaproteobacteria	Endozoicomonas numazuensis	PF00691|PF02412|PF13505	IPR006315|IPR006664|IPR006665|IPR027385
A0A081NJI8	OmpA	234	1137799	Gammaproteobacteria	Endozoicomonas numazuensis	PF00691	IPR006665
A0A081NKZ3	Membrane protein	217	1137799	Gammaproteobacteria	Endozoicomonas numazuensis	PF00691|PF13488	IPR006664|IPR006665|IPR039567
A0A083ZW25	Outer membrane porin F	608	1410619	Gammaproteobacteria	Serratia sp. DD3	PF00691	IPR006664|IPR006665
A0A083ZWG0	Photosystem I P700 chlorophyll a apoprotein A2	315	1410619	Gammaproteobacteria	Serratia sp. DD3	PF00691	IPR006664|IPR006665
A0A083ZWM9	Peptidoglycan-associated protein	169	1410619	Gammaproteobacteria	Serratia sp. DD3	PF00691	IPR006664|IPR006665|IPR014169
A0A084A0C1	Outer membrane protein Omp38	422	1410619	Gammaproteobacteria	Serratia sp. DD3	PF00691|PF09850	IPR006665|IPR017732|IPR017733
A0A084A122	Motility protein B	403	1410619	Gammaproteobacteria	Serratia sp. DD3	PF00691|PF09850	IPR006665|IPR017732|IPR017733
A0A084A175	Outer membrane protein A	357	1410619	Gammaproteobacteria	Serratia sp. DD3	PF00691|PF01389	IPR000498|IPR006664|IPR006665
A0A084A3D3	Outer membrane porin F	261	1410619	Gammaproteobacteria	Serratia sp. DD3	PF00691	IPR006664|IPR006665
A0A084A6M2	Outer membrane porin F	555	1410619	Gammaproteobacteria	Serratia sp. DD3	PF00691	IPR006664|IPR006665
A0A084A6S7	Photosystem I P700 chlorophyll a apoprotein A2	315	1410619	Gammaproteobacteria	Serratia sp. DD3	PF00691	IPR006664|IPR006665
A0A084CN12	Sodium-type flagellar protein	290	1179155	Gammaproteobacteria	Candidatus Photodesmus blepharus	PF00691|PF18393	IPR006665|IPR041544
A0A084CNG1	Outer membrane protein	198	1179155	Gammaproteobacteria	Candidatus Photodesmus blepharus	PF00691	IPR006664|IPR006665
A0A084CPB6	Peptidoglycan-associated protein	177	1179155	Gammaproteobacteria	Candidatus Photodesmus blepharus	PF00691	IPR006664|IPR006665|IPR014169
A0A084CPI1	Flagellar motor protein	294	1179155	Gammaproteobacteria	Candidatus Photodesmus blepharus	PF00691|PF13677	IPR006665|IPR025713
A0A084CPM3	Peptidoglycan-associated lipoprotein	275	1179155	Gammaproteobacteria	Candidatus Photodesmus blepharus	PF00691	IPR006664|IPR006665
A0A084IG27	OmpA/MotB domain-containing protein	321	1304275	Gammaproteobacteria	Salinisphaera hydrothermalis C41B8	PF00691	IPR006665
A0A084IGZ4	Outer membrane protein A	246	1304275	Gammaproteobacteria	Salinisphaera hydrothermalis C41B8	PF00691|PF13488	IPR006664|IPR006665|IPR039567
A0A084IKJ8	Peptidoglycan-associated protein	194	1304275	Gammaproteobacteria	Salinisphaera hydrothermalis C41B8	PF00691	IPR006664|IPR006665|IPR014169
A0A084ILX1	OmpA/MotB domain-containing protein	387	1304275	Gammaproteobacteria	Salinisphaera hydrothermalis C41B8	PF00691	IPR006664|IPR006665
A0A084IMW5	Chemotaxis protein MotB	323	1304275	Gammaproteobacteria	Salinisphaera hydrothermalis C41B8	PF00691|PF13677	IPR006665|IPR025713
A0A084INT8	OmpA/MotB	279	1304275	Gammaproteobacteria	Salinisphaera hydrothermalis C41B8	PF00691	IPR006664|IPR006665
A0A084U779	OmpA/MotB	343	472175	Alphaproteobacteria	Nitratireductor basaltis	PF00691	IPR006665
A0A084U798	Peptidoglycan-associated protein	172	472175	Alphaproteobacteria	Nitratireductor basaltis	PF00691	IPR006664|IPR006665|IPR014169
A0A084U895	OmpA/MotB	438	472175	Alphaproteobacteria	Nitratireductor basaltis	PF00691|PF13677	IPR006665|IPR025713
A0A084U9K5	OmpA/MotB protein	702	472175	Alphaproteobacteria	Nitratireductor basaltis	PF00691	IPR006665
A0A084UBH4	OmpA/MotB protein	218	472175	Alphaproteobacteria	Nitratireductor basaltis	PF00691|PF13441	IPR006664|IPR006665|IPR027367
A0A084Y6F0	Minor outer membrane protein Omp16	194	1454002	Betaproteobacteria	Candidatus Accumulibacter sp. BA-91	PF00691	IPR006664|IPR006665
A0A085BRA9	Cell envelope biogenesis protein OmpA	317	1525218	Alphaproteobacteria	Sulfitobacter sp. CB2047	PF00691	IPR006665
A0A085BRB9	Membrane protein	222	1525218	Alphaproteobacteria	Sulfitobacter sp. CB2047	PF00691|PF13488	IPR006664|IPR006665|IPR039567
A0A085BS31	Peptidoglycan-associated protein	174	1525218	Alphaproteobacteria	Sulfitobacter sp. CB2047	PF00691	IPR006664|IPR006665|IPR014169
A0A085BS49	Membrane protein	234	1525218	Alphaproteobacteria	Sulfitobacter sp. CB2047	PF00691	IPR006664|IPR006665
A0A085BU54	Membrane protein	665	1525218	Alphaproteobacteria	Sulfitobacter sp. CB2047	PF00691	IPR006665
A0A085BWQ7	Cell envelope biogenesis protein OmpA	191	1525218	Alphaproteobacteria	Sulfitobacter sp. CB2047	PF00691	IPR006665
A0A085BX10	Flagellar motor protein	582	1525218	Alphaproteobacteria	Sulfitobacter sp. CB2047	PF00691	IPR006665
A0A085BX63	Membrane protein	632	1525218	Alphaproteobacteria	Sulfitobacter sp. CB2047	PF00691|PF04972	IPR006664|IPR006665|IPR007055
A0A085BXW4	Cell envelope biogenesis protein OmpA	520	1525218	Alphaproteobacteria	Sulfitobacter sp. CB2047	PF00691|PF12849	IPR006665|IPR024370
A0A085BZD0	Chemotaxis protein MotB	394	1525218	Alphaproteobacteria	Sulfitobacter sp. CB2047	PF00691|PF13677	IPR006665|IPR025713
A0A085DRK3	Flagellar motor protein MotB	124	1485007	Gammaproteobacteria	Halomonas sp. SUBG004	PF00691	IPR006665
A0A085DTK9	Cell envelope biogenesis protein OmpA	78	1485007	Gammaproteobacteria	Halomonas sp. SUBG004	PF00691	IPR006664|IPR006665
A0A085DUN9	Flagellar motor protein MotB	282	1485007	Gammaproteobacteria	Halomonas sp. SUBG004	PF00691|PF02412	IPR006664|IPR006665
A0A085DUS7	Flagellar motor protein MotB	223	1485007	Gammaproteobacteria	Halomonas sp. SUBG004	PF00691|PF13677	IPR006665|IPR025713
A0A085DWX1	Peptidoglycan-associated protein	179	1485007	Gammaproteobacteria	Halomonas sp. SUBG004	PF00691	IPR006664|IPR006665|IPR014169
A0A085EWJ1	OmpA/MotB	274	1502851	Alphaproteobacteria	Bosea sp. LC85	PF00691|PF13677	IPR006665|IPR025713
A0A085F4R6	Peptidoglycan-associated protein	167	1502851	Alphaproteobacteria	Bosea sp. LC85	PF00691	IPR006664|IPR006665|IPR014169
A0A085F4V1	Flagellar motor rotation protein MotB	338	1502851	Alphaproteobacteria	Bosea sp. LC85	PF00691	IPR006665
A0A085FDN0	OmpA/MotB domain protein	781	1502851	Alphaproteobacteria	Bosea sp. LC85	PF00691	IPR006665
A0A085FN22	OmpA/MotB	304	1502851	Alphaproteobacteria	Bosea sp. LC85	PF00691	IPR006665
A0A085FZG8	Outer membrane protein A	220	1006004	Gammaproteobacteria	Buttiauxella agrestis ATCC 33320	PF00691|PF13488	IPR006664|IPR006665|IPR039567
A0A085FZU7	Outer membrane protein A	348	1006004	Gammaproteobacteria	Buttiauxella agrestis ATCC 33320	PF00691|PF01389	IPR000498|IPR006664|IPR006665
A0A085G4K1	Putative outer membrane lipoprotein	220	910964	Gammaproteobacteria	Ewingella americana ATCC 33852	PF00691|PF13488	IPR006664|IPR006665|IPR039567
A0A085G938	Peptidoglycan-associated protein	173	1006004	Gammaproteobacteria	Buttiauxella agrestis ATCC 33320	PF00691	IPR006664|IPR006665|IPR014169
A0A085GBA8	Outer membrane protein	567	910964	Gammaproteobacteria	Ewingella americana ATCC 33852	PF00691	IPR006664|IPR006665
A0A085GCY6	MotB family flagellar motor rotation protein	309	1006004	Gammaproteobacteria	Buttiauxella agrestis ATCC 33320	PF00691|PF13677	IPR006665|IPR025713
A0A085GGW7	Outer membrane protein A	356	1006004	Gammaproteobacteria	Buttiauxella agrestis ATCC 33320	PF00691|PF01389	IPR000498|IPR006664|IPR006665
A0A085GHE2	MotB family flagellar motor rotation protein	391	910964	Gammaproteobacteria	Ewingella americana ATCC 33852	PF00691|PF13677	IPR006665|IPR025713
A0A085GIJ2	Putative OmpA family outer membrane porin	559	910964	Gammaproteobacteria	Ewingella americana ATCC 33852	PF00691	IPR006664|IPR006665
A0A085GIK9	ImpK/VasF family outer membrane protein	463	910964	Gammaproteobacteria	Ewingella americana ATCC 33852	PF00691|PF09850	IPR006665|IPR017732|IPR017733
A0A085GJJ7	Outer membrane protein A	359	910964	Gammaproteobacteria	Ewingella americana ATCC 33852	PF00691|PF01389	IPR000498|IPR006664|IPR006665
A0A085GL49	MotB family flagellar motor rotation protein	293	910964	Gammaproteobacteria	Ewingella americana ATCC 33852	PF00691	IPR006665
A0A085GLF1	Peptidoglycan-associated protein	169	910964	Gammaproteobacteria	Ewingella americana ATCC 33852	PF00691	IPR006664|IPR006665|IPR014169
A0A085GLX1	Outer membrane protein A	349	1006004	Gammaproteobacteria	Buttiauxella agrestis ATCC 33320	PF00691|PF01389	IPR000498|IPR006664|IPR006665
A0A085GNX8	ImpK/VasF family outer membrane protein	412	910964	Gammaproteobacteria	Ewingella americana ATCC 33852	PF00691|PF09850	IPR006665|IPR017732|IPR017733
A0A085JAH4	Outer membrane protein A	452	1005995	Gammaproteobacteria	Tatumella ptyseos ATCC 33301	PF00691|PF09850	IPR006665|IPR017732|IPR017733
A0A085JAJ0	Uncharacterized protein	584	1005995	Gammaproteobacteria	Tatumella ptyseos ATCC 33301	PF00691	IPR006664|IPR006665
A0A085JBT7	Peptidoglycan-associated protein	172	1005995	Gammaproteobacteria	Tatumella ptyseos ATCC 33301	PF00691	IPR006664|IPR006665|IPR014169
A0A085JCG6	Outer membrane protein A	351	1005995	Gammaproteobacteria	Tatumella ptyseos ATCC 33301	PF00691|PF01389	IPR000498|IPR006664|IPR006665
A0A085JKL5	MotB family flagellar motor rotation protein	306	1005995	Gammaproteobacteria	Tatumella ptyseos ATCC 33301	PF00691|PF13677	IPR006665|IPR025713
A0A085TVS2	OmpA/MotB domain-containing protein	319	1317124	Alphaproteobacteria	Thioclava atlantica	PF00691	IPR006664|IPR006665
A0A085TY35	OmpA/MotB domain-containing protein	221	1317124	Alphaproteobacteria	Thioclava atlantica	PF00691	IPR006664|IPR006665
A0A085TY53	Peptidoglycan-associated protein	175	1317124	Alphaproteobacteria	Thioclava atlantica	PF00691	IPR006664|IPR006665|IPR014169
A0A085TYB5	Chemotaxis MotB protein	379	1317124	Alphaproteobacteria	Thioclava atlantica	PF00691|PF13677	IPR006665|IPR025713
A0A085TZB9	OmpA/MotB domain-containing protein	688	1317124	Alphaproteobacteria	Thioclava atlantica	PF00691|PF04972	IPR006664|IPR006665|IPR007055
A0A085TZD7	OmpA family protein	226	1317124	Alphaproteobacteria	Thioclava atlantica	PF00691|PF13488	IPR006664|IPR006665|IPR039567
A0A085U0A2	Uncharacterized protein	463	1317124	Alphaproteobacteria	Thioclava atlantica	PF00691	IPR006665
A0A085U0J5	OmpA/MotB domain-containing protein	714	1317124	Alphaproteobacteria	Thioclava atlantica	PF00691	IPR006665
A0A085V7E8	Porin	344	317	Gammaproteobacteria	Pseudomonas syringae	PF00691|PF05736	IPR006664|IPR006665|IPR008722
A0A085V9B8	Flagellar motor protein MotB	340	317	Gammaproteobacteria	Pseudomonas syringae	PF00691|PF13677	IPR006665|IPR025713
A0A085VBW5	Peptidoglycan-associated protein	166	317	Gammaproteobacteria	Pseudomonas syringae	PF00691	IPR006664|IPR006665|IPR014169
A0A085VC68	Membrane protein	260	317	Gammaproteobacteria	Pseudomonas syringae	PF00691|PF14346	IPR006664|IPR006665|IPR025511
A0A085VHA9	Membrane protein	271	317	Gammaproteobacteria	Pseudomonas syringae	PF00691|PF14346	IPR006664|IPR006665|IPR025511
A0A085VMF1	Membrane protein	368	317	Gammaproteobacteria	Pseudomonas syringae	PF00691	IPR006665
A0A085VMF7	Membrane protein	233	317	Gammaproteobacteria	Pseudomonas syringae	PF00691	IPR006664|IPR006665
A0A085VMI5	Membrane protein	301	317	Gammaproteobacteria	Pseudomonas syringae	PF00691|PF18393	IPR006664|IPR006665|IPR041544
A0A085VQ91	Membrane protein	445	317	Gammaproteobacteria	Pseudomonas syringae	PF00691|PF12849	IPR006665|IPR024370
A0A085VQJ4	Cell envelope biogenesis protein OmpA	234	317	Gammaproteobacteria	Pseudomonas syringae	PF00691|PF13488	IPR006664|IPR006665|IPR039567
A0A085VQR5	Flagellar motor protein MotD	295	317	Gammaproteobacteria	Pseudomonas syringae	PF00691|PF13677	IPR006665|IPR025713
A0A086MDI0	Uncharacterized protein	411	1549810	Alphaproteobacteria	Microvirga sp. BSC39	PF00691|PF13677	IPR006665|IPR025713
A0A086MMB4	Peptidoglycan-associated protein	166	1549810	Alphaproteobacteria	Microvirga sp. BSC39	PF00691	IPR006664|IPR006665|IPR014169
A0A086MN53	Uncharacterized protein	342	1549810	Alphaproteobacteria	Microvirga sp. BSC39	PF00691	IPR006665
A0A086W6T5	Membrane protein	373	1549812	Betaproteobacteria	Massilia sp. BSC265	PF00691|PF01389	IPR000498|IPR006664|IPR006665
A0A086W6W0	Membrane protein	238	1549812	Betaproteobacteria	Massilia sp. BSC265	PF00691	IPR006664|IPR006665
A0A086W9G1	Membrane protein	222	1549812	Betaproteobacteria	Massilia sp. BSC265	PF00691|PF13488	IPR006664|IPR006665|IPR039567
A0A086W9G7	Flagellar motor protein MotB	306	1549812	Betaproteobacteria	Massilia sp. BSC265	PF00691|PF14346	IPR006664|IPR006665|IPR025511
A0A086W9H7	Flagellar motor protein MotB	342	1549812	Betaproteobacteria	Massilia sp. BSC265	PF00691|PF13505	IPR006664|IPR006665|IPR027385
A0A086W9T7	Flagellar motor protein MotB	309	1549812	Betaproteobacteria	Massilia sp. BSC265	PF00691|PF13677	IPR006665|IPR025713
A0A086WB93	Histidine kinase	313	1549812	Betaproteobacteria	Massilia sp. BSC265	PF00691|PF13677	IPR006665|IPR025713
A0A086WFS9	Peptidoglycan-associated protein	174	1549812	Betaproteobacteria	Massilia sp. BSC265	PF00691	IPR006664|IPR006665|IPR014169
A0A086WG54	Flagellar motor protein MotD	250	1549812	Betaproteobacteria	Massilia sp. BSC265	PF00691|PF13677	IPR006665|IPR025713
A0A086Y163	Peptidoglycan-associated protein	180	1105367	Alphaproteobacteria	Paenirhodobacter enshiensis	PF00691	IPR006664|IPR006665|IPR014169
A0A086Y176	Uncharacterized protein	218	1105367	Alphaproteobacteria	Paenirhodobacter enshiensis	PF00691	IPR006664|IPR006665
A0A086Y4B6	Flagellar motor protein MotB	448	1105367	Alphaproteobacteria	Paenirhodobacter enshiensis	PF00691	IPR006665
A0A086Y863	Membrane protein	306	195105	Alphaproteobacteria	Haematobacter massiliensis	PF00691	IPR006664|IPR006665
A0A086YA81	Peptidoglycan-associated protein	184	195105	Alphaproteobacteria	Haematobacter massiliensis	PF00691	IPR006664|IPR006665|IPR014169
A0A086YAR3	Membrane protein	672	195105	Alphaproteobacteria	Haematobacter massiliensis	PF00691	IPR006664|IPR006665
A0A086YB60	Flagellar motor protein	504	195105	Alphaproteobacteria	Haematobacter massiliensis	PF00691	IPR006665
A0A086YCD7	Membrane protein	214	195105	Alphaproteobacteria	Haematobacter massiliensis	PF00691	IPR006664|IPR006665
A0A087MFF7	Uncharacterized protein	336	1121014	Gammaproteobacteria	Arenimonas donghaensis DSM 18148 = HO3-R19	PF00691|PF13505	IPR006664|IPR006665|IPR027385
A0A087MFW5	Uncharacterized protein	175	1121014	Gammaproteobacteria	Arenimonas donghaensis DSM 18148 = HO3-R19	PF00691	IPR006664|IPR006665
A0A087MG52	Peptidoglycan-associated protein	168	1121014	Gammaproteobacteria	Arenimonas donghaensis DSM 18148 = HO3-R19	PF00691	IPR006664|IPR006665|IPR014169
A0A087MH30	Uncharacterized protein	232	1121014	Gammaproteobacteria	Arenimonas donghaensis DSM 18148 = HO3-R19	PF00691|PF13441	IPR006664|IPR006665|IPR027367
A0A087MIP7	Uncharacterized protein	433	1121014	Gammaproteobacteria	Arenimonas donghaensis DSM 18148 = HO3-R19	PF00691|PF13620	IPR006664|IPR006665
A0A087MJM3	Uncharacterized protein	316	1121014	Gammaproteobacteria	Arenimonas donghaensis DSM 18148 = HO3-R19	PF00691	IPR006664|IPR006665
A0A087MKT7	Uncharacterized protein	3704	1121014	Gammaproteobacteria	Arenimonas donghaensis DSM 18148 = HO3-R19	PF00691|PF01345|PF17963	IPR001434|IPR006665
A0A090AB11	Uncharacterized protein	392	40754	Gammaproteobacteria	Thioploca ingrica	PF00691	IPR006665
A0A090AFG7	Outer membrane protein/peptidoglycan-associated (Lipo)protein	225	40754	Gammaproteobacteria	Thioploca ingrica	PF00691|PF13441	IPR006664|IPR006665|IPR027367
A0A090AI68	Peptidoglycan-associated protein	179	40754	Gammaproteobacteria	Thioploca ingrica	PF00691	IPR006664|IPR006665|IPR014169
A0A090AJ03	Peptidoglycan-associated lipoprotein	181	1410383	Gammaproteobacteria	Candidatus Tachikawaea gelatinosa	PF00691	IPR006664|IPR006665
A0A090ALM5	NAD(+) ADP-ribosyltransferase	855	40754	Gammaproteobacteria	Thioploca ingrica	PF00691|PF08487|PF13768	IPR002035|IPR006664|IPR006665|IPR013694
A0A090AM55	OmpA/MotB domain-containing protein	300	40754	Gammaproteobacteria	Thioploca ingrica	PF00691|PF02412	IPR006664|IPR006665
A0A090AN17	OmpA/MotB protein	257	40754	Gammaproteobacteria	Thioploca ingrica	PF00691|PF14346	IPR006665|IPR025511
A0A090APC0	OmpA family protein	164	40754	Gammaproteobacteria	Thioploca ingrica	PF00691	IPR006664|IPR006665
A0A090AR28	OmpA/MotB protein	294	40754	Gammaproteobacteria	Thioploca ingrica	PF00691|PF02412	IPR006664|IPR006665
A0A090BUY7	OmpA/MotB protein	961	40754	Gammaproteobacteria	Thioploca ingrica	PF00691	IPR006664|IPR006665
A0A090BV56	OmpA/MotB protein	302	40754	Gammaproteobacteria	Thioploca ingrica	PF00691|PF02412	IPR006664|IPR006665
A0A090I5W2	Outer membrane protein| OmpA family	222	80852	Gammaproteobacteria	Aliivibrio wodanis	PF00691|PF13488	IPR006664|IPR006665|IPR039567
A0A090I6S7	Outer membrane protein| OmpA family	210	80852	Gammaproteobacteria	Aliivibrio wodanis	PF00691	IPR006664|IPR006665
A0A090I6V3	Outer membrane protein| OmpA family	185	80852	Gammaproteobacteria	Aliivibrio wodanis	PF00691	IPR006664|IPR006665
A0A090I6X3	Outer membrane protein| OmpA family	1613	80852	Gammaproteobacteria	Aliivibrio wodanis	PF00691	IPR006665
A0A090I7F8	Outer membrane protein| OmpA family	211	80852	Gammaproteobacteria	Aliivibrio wodanis	PF00691	IPR006664|IPR006665
A0A090I7N6	Outer membrane protein| OmpA family	277	80852	Gammaproteobacteria	Aliivibrio wodanis	PF00691	IPR006664|IPR006665
A0A090IAI8	Outer membrane protein| OmpA family	1575	80852	Gammaproteobacteria	Aliivibrio wodanis	PF00691	IPR006664|IPR006665
A0A090IDN9	Outer membrane protein	284	80854	Gammaproteobacteria	Moritella viscosa	PF00691|PF18393	IPR006665|IPR041544
A0A090IEC9	Outer membrane protein| OmpA family	1571	80854	Gammaproteobacteria	Moritella viscosa	PF00691	IPR006665
A0A090IEY6	Peptidoglycan-associated protein	192	80854	Gammaproteobacteria	Moritella viscosa	PF00691	IPR006664|IPR006665|IPR014169
A0A090IF33	Outer membrane protein	198	80854	Gammaproteobacteria	Moritella viscosa	PF00691	IPR006664|IPR006665
A0A090IF65	Component of sodium-driven polar flagellar motor	293	80854	Gammaproteobacteria	Moritella viscosa	PF00691|PF18393	IPR006665|IPR041544
A0A090IFC6	Conserved hypothetical outer membrane protein	210	80854	Gammaproteobacteria	Moritella viscosa	PF00691	IPR006664|IPR006665
A0A090IKD0	Outer membrane protein	189	80854	Gammaproteobacteria	Moritella viscosa	PF00691	IPR006664|IPR006665
A0A090IKM0	Outer membrane protein	346	80852	Gammaproteobacteria	Aliivibrio wodanis	PF00691|PF01389	IPR000498|IPR006664|IPR006665
A0A090IL23	Sodium-type flagellar protein MotY	292	80852	Gammaproteobacteria	Aliivibrio wodanis	PF00691|PF18393	IPR006664|IPR006665|IPR041544
A0A090ILL8	Outer membrane protein A	350	80852	Gammaproteobacteria	Aliivibrio wodanis	PF00691|PF01389	IPR000498|IPR006664|IPR006665
A0A090INA4	Sodium-driven polar flagellar protein MotB	309	80852	Gammaproteobacteria	Aliivibrio wodanis	PF00691|PF13677	IPR006665|IPR025713
A0A090INC0	Outer membrane protein	214	80854	Gammaproteobacteria	Moritella viscosa	PF00691|PF13488	IPR006664|IPR006665|IPR039567
A0A090INZ0	Peptidoglycan-associated protein	181	80852	Gammaproteobacteria	Aliivibrio wodanis	PF00691	IPR006664|IPR006665|IPR014169
A0A090K2F7	Outer membrane protein OmpA family	201	80852	Gammaproteobacteria	Aliivibrio wodanis	PF00691	IPR006664|IPR006665
A0A090K4W7	Hypothetical chemotaxis LafU protein	334	80854	Gammaproteobacteria	Moritella viscosa	PF00691|PF13677	IPR006665|IPR025713
A0A090K5D8	Outer membrane protein	214	80854	Gammaproteobacteria	Moritella viscosa	PF00691	IPR006664|IPR006665
A0A090KB71	OmpA/MotB domain protein	367	80854	Gammaproteobacteria	Moritella viscosa	PF00691|PF13505	IPR006664|IPR006665|IPR027385
A0A090KC22	Outer membrane protein	254	80854	Gammaproteobacteria	Moritella viscosa	PF00691	IPR006664|IPR006665
A0A090KCN4	Sodium-driven polar flagellar protein MotB	305	80854	Gammaproteobacteria	Moritella viscosa	PF00691|PF13677	IPR006665|IPR025713
A0A090P1L9	Uncharacterized protein	203	265668	Gammaproteobacteria	Vibrio ponticus	PF00691	IPR006664|IPR006665
A0A090P384	Protein F-related protein	90	265668	Gammaproteobacteria	Vibrio ponticus	PF00691	IPR006664|IPR006665
A0A090P3E9	Outer membrane protein A	320	265668	Gammaproteobacteria	Vibrio ponticus	PF00691|PF01389	IPR000498|IPR006664|IPR006665
A0A090P470	Peptidoglycan-associated protein	171	265668	Gammaproteobacteria	Vibrio ponticus	PF00691	IPR006664|IPR006665|IPR014169
A0A090P5R5	Outer membrane protein A	212	265668	Gammaproteobacteria	Vibrio ponticus	PF00691	IPR006664|IPR006665
A0A090P6A5	Uncharacterized protein	167	265668	Gammaproteobacteria	Vibrio ponticus	PF00691	IPR006664|IPR006665
A0A090P6H2	Outer membrane protein A	319	265668	Gammaproteobacteria	Vibrio ponticus	PF00691|PF13505	IPR006664|IPR006665|IPR027385
A0A090P7V4	Outer membrane protein A	234	265668	Gammaproteobacteria	Vibrio ponticus	PF00691|PF01389	IPR000498|IPR006664|IPR006665
A0A090P9P9	Major porin and structural outer membrane porin OprF	157	265668	Gammaproteobacteria	Vibrio ponticus	PF00691	IPR006664|IPR006665
A0A090P9Q4	Flagellar motor rotation protein MotB	298	265668	Gammaproteobacteria	Vibrio ponticus	PF00691|PF13677	IPR006665|IPR025713
A0A090PBJ1	Outer membrane protein SypB	225	265668	Gammaproteobacteria	Vibrio ponticus	PF00691	IPR006664|IPR006665
A0A090PBY0	Sodium-type flagellar protein MotY	293	265668	Gammaproteobacteria	Vibrio ponticus	PF00691|PF18393	IPR006665|IPR041544
A0A090PDD3	Outer membrane protein A	329	265668	Gammaproteobacteria	Vibrio ponticus	PF00691|PF13505	IPR006664|IPR006665|IPR027385
A0A090PJL7	Outer membrane protein assembly factor YaeT	222	265668	Gammaproteobacteria	Vibrio ponticus	PF00691|PF13488	IPR006664|IPR006665|IPR039567
A0A090QIE1	Membrane protein	328	754436	Gammaproteobacteria	Photobacterium aphoticum	PF00691|PF01389	IPR000498|IPR006664|IPR006665
A0A090QV45	Flagellar motor protein MotB	310	754436	Gammaproteobacteria	Photobacterium aphoticum	PF00691|PF13677	IPR006665|IPR025713
A0A090R250	Sodium-type flagellar protein MotY	300	1001886	Gammaproteobacteria	Vibrio sp. C7	PF00691|PF18393	IPR006665|IPR041544
A0A090R327	Uncharacterized protein	189	1001886	Gammaproteobacteria	Vibrio sp. C7	PF00691	IPR006664|IPR006665
A0A090R4A8	Outer membrane protein	222	1001886	Gammaproteobacteria	Vibrio sp. C7	PF00691|PF13441	IPR006664|IPR006665|IPR027367
A0A090R5L0	Outer membrane lipoprotein OmpA family	229	1001886	Gammaproteobacteria	Vibrio sp. C7	PF00691	IPR006664|IPR006665
A0A090RA80	Outer membrane protein SypB	277	1001886	Gammaproteobacteria	Vibrio sp. C7	PF00691	IPR006664|IPR006665
A0A090RAX9	Outer membrane protein A	228	1001886	Gammaproteobacteria	Vibrio sp. C7	PF00691|PF01389	IPR000498|IPR006664|IPR006665
A0A090RB60	Flagellar motor rotation protein MotB	274	1001886	Gammaproteobacteria	Vibrio sp. C7	PF00691	IPR006665
A0A090RB70	Outer membrane protein A	315	1001886	Gammaproteobacteria	Vibrio sp. C7	PF00691|PF01389	IPR000498|IPR006664|IPR006665
A0A090RB96	Outer membrane protein A	211	1001886	Gammaproteobacteria	Vibrio sp. C7	PF00691	IPR006664|IPR006665
A0A090RDS0	Outer membrane protein A	280	1001886	Gammaproteobacteria	Vibrio sp. C7	PF00691|PF18393	IPR006664|IPR006665|IPR041544
A0A090RGI4	Outer membrane protein	185	1001886	Gammaproteobacteria	Vibrio sp. C7	PF00691	IPR006664|IPR006665
A0A090RGK7	Outer membrane protein A	139	1001886	Gammaproteobacteria	Vibrio sp. C7	PF00691	IPR006664|IPR006665
A0A090RGU4	Flagellar motor rotation protein MotB	86	1001886	Gammaproteobacteria	Vibrio sp. C7	PF00691	IPR006665
A0A090RH43	Outer membrane protein	304	1001886	Gammaproteobacteria	Vibrio sp. C7	PF00691|PF13505	IPR006664|IPR006665|IPR027385
A0A090RIB4	Flagellar motor rotation protein MotB	322	1001886	Gammaproteobacteria	Vibrio sp. C7	PF00691|PF13677	IPR006665|IPR025713
A0A090RJL9	Outer membrane protein	216	1001886	Gammaproteobacteria	Vibrio sp. C7	PF00691|PF13488	IPR006664|IPR006665|IPR039567
A0A090RKU3	Uncharacterized protein	639	1001886	Gammaproteobacteria	Vibrio sp. C7	PF00691	IPR006665
A0A090S4G3	Peptidoglycan-associated protein	183	1001886	Gammaproteobacteria	Vibrio sp. C7	PF00691	IPR006664|IPR006665|IPR014169
A0A090S6L8	Outer membrane protein A	266	1001886	Gammaproteobacteria	Vibrio sp. C7	PF00691|PF01389	IPR000498|IPR006664|IPR006665
A0A090S998	Outer membrane protein assembly factor YaeT	221	990271	Gammaproteobacteria	Vibrio variabilis	PF00691|PF13488	IPR006664|IPR006665|IPR039567
A0A090SE28	Flagellar motor rotation protein MotB	162	990271	Gammaproteobacteria	Vibrio variabilis	PF00691	IPR006665
A0A090SE29	Uncharacterized protein	207	990271	Gammaproteobacteria	Vibrio variabilis	PF00691	IPR006664|IPR006665
A0A090SF20	Putative sodium-type flagellar protein MotY	203	990271	Gammaproteobacteria	Vibrio variabilis	PF00691	IPR006664|IPR006665
A0A090SFK2	Outer membrane protein SypB	276	990271	Gammaproteobacteria	Vibrio variabilis	PF00691	IPR006664|IPR006665
A0A090SHB9	Sodium-type flagellar protein MotY	294	990271	Gammaproteobacteria	Vibrio variabilis	PF00691|PF18393	IPR006665|IPR041544
A0A090SIK5	OmpA family outer membrane lipoprotein	185	990271	Gammaproteobacteria	Vibrio variabilis	PF00691	IPR006664|IPR006665
A0A090SJ35	Flagellar motor rotation protein MotB	106	990271	Gammaproteobacteria	Vibrio variabilis	PF00691	IPR006665
A0A090SQ40	Outer membrane protein A	131	990271	Gammaproteobacteria	Vibrio variabilis	PF00691	IPR006664|IPR006665
A0A090SQL2	Outer membrane lipoprotein OmpA family	83	990271	Gammaproteobacteria	Vibrio variabilis	PF00691	IPR006664|IPR006665
A0A090SQR2	Outer membrane lipoprotein OmpA family	160	990271	Gammaproteobacteria	Vibrio variabilis	PF00691	IPR006664|IPR006665
A0A090SRL7	Outer membrane protein A	387	990271	Gammaproteobacteria	Vibrio variabilis	PF00691|PF13505	IPR006665|IPR027385
A0A090SU86	Major porin and structural outer membrane porin OprF	193	990271	Gammaproteobacteria	Vibrio variabilis	PF00691	IPR006664|IPR006665
A0A090SUF5	Peptidoglycan-associated protein	171	990271	Gammaproteobacteria	Vibrio variabilis	PF00691	IPR006664|IPR006665|IPR014169
A0A090SWY7	Outer membrane protein A	338	990268	Gammaproteobacteria	Vibrio maritimus	PF00691|PF01389	IPR000498|IPR006664|IPR006665
A0A090T0L1	Major porin and structural outer membrane porin OprF	208	990268	Gammaproteobacteria	Vibrio maritimus	PF00691	IPR006664|IPR006665
A0A090T1I8	Flagellar motor rotation protein MotB	294	990268	Gammaproteobacteria	Vibrio maritimus	PF00691|PF13677	IPR006665|IPR025713
A0A090T3A3	OmpA family outer membrane lipoprotein	282	990268	Gammaproteobacteria	Vibrio maritimus	PF00691	IPR006664|IPR006665
A0A090T3H0	Flagellar motor rotation protein MotB	259	990268	Gammaproteobacteria	Vibrio maritimus	PF00691|PF13677	IPR006665|IPR025713
A0A090T4T2	Outer membrane protein	206	990268	Gammaproteobacteria	Vibrio maritimus	PF00691	IPR006664|IPR006665
A0A090T6J8	Uncharacterized protein	207	990268	Gammaproteobacteria	Vibrio maritimus	PF00691	IPR006664|IPR006665
A0A090T7S8	Flagellar motor rotation protein MotB	322	990271	Gammaproteobacteria	Vibrio variabilis	PF00691|PF13677	IPR006665|IPR025713
A0A090T808	Outer membrane protein SypB	285	990268	Gammaproteobacteria	Vibrio maritimus	PF00691	IPR006664|IPR006665
A0A090TC62	Protein F-related protein	154	990271	Gammaproteobacteria	Vibrio variabilis	PF00691	IPR006664|IPR006665
A0A090TCR0	Flagellar motor rotation protein MotB	166	990268	Gammaproteobacteria	Vibrio maritimus	PF00691	IPR006665
A0A090TDF6	Sodium-type flagellar protein MotY	313	990268	Gammaproteobacteria	Vibrio maritimus	PF00691|PF18393	IPR006665|IPR041544
A0A090TDP2	Outer membrane protein assembly factor YaeT	221	990268	Gammaproteobacteria	Vibrio maritimus	PF00691|PF13488	IPR006664|IPR006665|IPR039567
A0A090TLU1	Protein F-related protein	203	990268	Gammaproteobacteria	Vibrio maritimus	PF00691	IPR006664|IPR006665
A0A090TT95	Outer membrane lipoprotein OmpA family	226	990268	Gammaproteobacteria	Vibrio maritimus	PF00691	IPR006664|IPR006665
A0A090U1Y3	Peptidoglycan-associated protein	175	990268	Gammaproteobacteria	Vibrio maritimus	PF00691	IPR006664|IPR006665|IPR014169
A0A091AEM0	Uncharacterized protein	643	1537917	Epsilonproteobacteria	Sulfuricurvum sp. MLSB	PF00691|PF02321	IPR006664|IPR006665
A0A091AG26	Uncharacterized protein	360	1538640	Deltaproteobacteria	Smithella sp. F21	PF00691|PF13505	IPR006664|IPR006665|IPR027385
A0A091AGH7	Uncharacterized protein	217	1537917	Epsilonproteobacteria	Sulfuricurvum sp. MLSB	PF00691|PF13488	IPR006664|IPR006665|IPR039567
A0A091AHN9	Uncharacterized protein	279	1537917	Epsilonproteobacteria	Sulfuricurvum sp. MLSB	PF00691|PF13677	IPR006665|IPR025713
A0A091ALY4	Uncharacterized protein	183	1537917	Epsilonproteobacteria	Sulfuricurvum sp. MLSB	PF00691	IPR006664|IPR006665
A0A091AQL4	Uncharacterized protein	431	1121015	Gammaproteobacteria	Arenimonas oryziterrae DSM 21050 = YC6267	PF00691|PF12849	IPR006665|IPR024370
A0A091AR71	Uncharacterized protein	350	1121015	Gammaproteobacteria	Arenimonas oryziterrae DSM 21050 = YC6267	PF00691|PF13505	IPR006664|IPR006665|IPR027385
A0A091ASD5	Peptidoglycan-associated protein	170	1121015	Gammaproteobacteria	Arenimonas oryziterrae DSM 21050 = YC6267	PF00691	IPR006664|IPR006665|IPR014169
A0A091ATP6	Uncharacterized protein	358	1121015	Gammaproteobacteria	Arenimonas oryziterrae DSM 21050 = YC6267	PF00691	IPR006664|IPR006665
A0A091AXY6	Uncharacterized protein	353	1121015	Gammaproteobacteria	Arenimonas oryziterrae DSM 21050 = YC6267	PF00691|PF16234	IPR006664|IPR006665
A0A091B145	Uncharacterized protein	401	1538640	Deltaproteobacteria	Smithella sp. F21	PF00691	IPR006664|IPR006665
A0A091B149	Uncharacterized protein	314	1538640	Deltaproteobacteria	Smithella sp. F21	PF00691|PF14346	IPR006664|IPR006665|IPR025511
A0A091BDY9	Uncharacterized protein	347	1121015	Gammaproteobacteria	Arenimonas oryziterrae DSM 21050 = YC6267	PF00691	IPR006665
A0A091FEJ5	Uncharacterized protein	234	1499107	Deltaproteobacteria	Smithella sp. SCADC	PF00691	IPR006665
A0A091FH00	Peptidoglycan-associated protein	199	1499107	Deltaproteobacteria	Smithella sp. SCADC	PF00691	IPR006664|IPR006665|IPR014169
A0A091FJL8	Membrane protein	219	1499107	Deltaproteobacteria	Smithella sp. SCADC	PF00691|PF13488	IPR006664|IPR006665|IPR039567
A0A091FYX0	Uncharacterized protein	62	1499107	Deltaproteobacteria	Smithella sp. SCADC	PF00691	IPR006665
A0A091G3B8	Peptidoglycan-associated protein	193	1499107	Deltaproteobacteria	Smithella sp. SCADC	PF00691	IPR006664|IPR006665|IPR014169
A0A094J040	Peptidoglycan-associated protein	180	435908	Gammaproteobacteria	Idiomarina salinarum	PF00691	IPR006664|IPR006665|IPR014169
A0A094J231	Membrane protein	210	435908	Gammaproteobacteria	Idiomarina salinarum	PF00691|PF13488	IPR006664|IPR006665|IPR039567
A0A094J9I3	Membrane protein	371	1515746	Gammaproteobacteria	Shewanella mangrovi	PF00691|PF01389	IPR000498|IPR006664|IPR006665
A0A094JCB5	Uncharacterized protein	356	435908	Gammaproteobacteria	Idiomarina salinarum	PF00691	IPR006664|IPR006665
A0A094JED8	Flagellar motor protein MotB	305	435908	Gammaproteobacteria	Idiomarina salinarum	PF00691|PF13677	IPR006665|IPR025713
A0A094JG17	Membrane protein	221	1515746	Gammaproteobacteria	Shewanella mangrovi	PF00691|PF13488	IPR006664|IPR006665|IPR039567
A0A094JJM7	Flagellar motor protein MotB	314	1515746	Gammaproteobacteria	Shewanella mangrovi	PF00691|PF13677	IPR006665|IPR025713
A0A094JKB9	Membrane protein	290	1515746	Gammaproteobacteria	Shewanella mangrovi	PF00691|PF18393	IPR006664|IPR006665|IPR041544
A0A094JUG3	Membrane protein	201	1515746	Gammaproteobacteria	Shewanella mangrovi	PF00691	IPR006664|IPR006665
A0A094K1Y7	Membrane protein	249	1515746	Gammaproteobacteria	Shewanella mangrovi	PF00691	IPR006664|IPR006665
A0A094KH40	Uncharacterized protein	340	1538639	Deltaproteobacteria	Smithella sp. D17	PF00691	IPR006664|IPR006665
A0A094KIB2	Peptidoglycan-associated protein	196	1538639	Deltaproteobacteria	Smithella sp. D17	PF00691	IPR006664|IPR006665|IPR014169
A0A094LQB1	Peptidoglycan-associated protein	184	1515746	Gammaproteobacteria	Shewanella mangrovi	PF00691	IPR006664|IPR006665|IPR014169
A0A094LSL7	Histidine kinase	334	1515746	Gammaproteobacteria	Shewanella mangrovi	PF00691|PF13677	IPR006665|IPR025713
A0A095CJS1	Peptidoglycan-associated protein	169	1469613	Alphaproteobacteria	Rhodovulum sp. NI22	PF00691	IPR006664|IPR006665|IPR014169
A0A095CQJ3	Uncharacterized protein	320	1469613	Alphaproteobacteria	Rhodovulum sp. NI22	PF00691	IPR006664|IPR006665
A0A095CQX5	Cell envelope biogenesis protein OmpA	177	1469613	Alphaproteobacteria	Rhodovulum sp. NI22	PF00691	IPR006665
A0A095CSG3	Flagellar motor protein	627	1469613	Alphaproteobacteria	Rhodovulum sp. NI22	PF00691	IPR006665
A0A095CTD3	Chemotaxis protein MotB	282	1469613	Alphaproteobacteria	Rhodovulum sp. NI22	PF00691|PF13677	IPR006665|IPR025713
A0A095CTZ9	Cell envelope biogenesis protein OmpA	504	1469613	Alphaproteobacteria	Rhodovulum sp. NI22	PF00691|PF12849	IPR006665|IPR024370
A0A095EWN9	Membrane protein	219	1469613	Alphaproteobacteria	Rhodovulum sp. NI22	PF00691	IPR006664|IPR006665
A0A095EZX7	Membrane protein	221	1469613	Alphaproteobacteria	Rhodovulum sp. NI22	PF00691|PF13488	IPR006664|IPR006665|IPR039567
A0A095UAX3	Flagellar motor protein MotB	433	1532558	Alphaproteobacteria	Rhizobium sp. YS-1r	PF00691|PF13677	IPR006665|IPR025713
A0A095UF64	Cell envelope biogenesis protein OmpA	221	1532558	Alphaproteobacteria	Rhizobium sp. YS-1r	PF00691|PF13488	IPR006664|IPR006665|IPR039567
A0A095UTS1	Uncharacterized protein	343	1532558	Alphaproteobacteria	Rhizobium sp. YS-1r	PF00691	IPR006665
A0A095UZ86	Uncharacterized protein	725	1532558	Alphaproteobacteria	Rhizobium sp. YS-1r	PF00691	IPR006664|IPR006665
A0A095WVE3	Peptidoglycan-associated protein	180	1265313	Gammaproteobacteria	Pseudohaliea rubra DSM 19751	PF00691	IPR006664|IPR006665|IPR014169
A0A095WVJ5	Outer membrane protein	235	1265313	Gammaproteobacteria	Pseudohaliea rubra DSM 19751	PF00691	IPR006664|IPR006665
A0A095WZ76	Agglutination protein	627	1265313	Gammaproteobacteria	Pseudohaliea rubra DSM 19751	PF00691|PF02321	IPR006664|IPR006665
A0A095XJX5	Peptidoglycan-associated protein	169	1532558	Alphaproteobacteria	Rhizobium sp. YS-1r	PF00691	IPR006664|IPR006665|IPR014169
A0A095XQJ1	Uncharacterized protein	213	1532558	Alphaproteobacteria	Rhizobium sp. YS-1r	PF00691	IPR006664|IPR006665
A0A095XW84	Outer membrane protein A	251	1265313	Gammaproteobacteria	Pseudohaliea rubra DSM 19751	PF00691|PF02412	IPR006664|IPR006665
A0A095YZZ6	Membrane protein	273	1401065	Betaproteobacteria	Oligella urethralis DNF00040	PF00691|PF04355	IPR006664|IPR006665|IPR007450
A0A095Z4E7	Uncharacterized protein	205	1401065	Betaproteobacteria	Oligella urethralis DNF00040	PF00691	IPR006664|IPR006665
A0A095ZA41	Uncharacterized protein	431	1401065	Betaproteobacteria	Oligella urethralis DNF00040	PF00691|PF09850	IPR006665|IPR017732|IPR017733
A0A095ZBH7	Membrane protein	212	1401065	Betaproteobacteria	Oligella urethralis DNF00040	PF00691|PF13441	IPR006664|IPR006665|IPR027367
A0A096AFX2	Membrane protein	189	1401065	Betaproteobacteria	Oligella urethralis DNF00040	PF00691	IPR006664|IPR006665
A0A096BHJ3	Peptidoglycan-associated protein	161	1401065	Betaproteobacteria	Oligella urethralis DNF00040	PF00691	IPR006664|IPR006665|IPR014169
A0A097EHJ8	Flagellar motor protein	301	1549858	Alphaproteobacteria	Sphingomonas taxi	PF00691|PF13677	IPR006665|IPR025713
A0A097EI97	Membrane protein	223	1549858	Alphaproteobacteria	Sphingomonas taxi	PF00691|PF13488	IPR006664|IPR006665|IPR039567
A0A097EIZ7	Peptidoglycan-associated protein	174	1549858	Alphaproteobacteria	Sphingomonas taxi	PF00691	IPR006664|IPR006665|IPR014169
A0A097EJ56	Flagellar motor protein MotB	372	1549858	Alphaproteobacteria	Sphingomonas taxi	PF00691|PF13505	IPR006664|IPR006665|IPR027385
A0A097QI95	Chemotaxis protein	330	190893	Gammaproteobacteria	Vibrio coralliilyticus	PF00691|PF13677	IPR006665|IPR025713
A0A097QIV6	Peptidoglycan-associated protein	179	190893	Gammaproteobacteria	Vibrio coralliilyticus	PF00691	IPR006664|IPR006665|IPR014169
A0A097QJU0	OmpA family protein	279	190893	Gammaproteobacteria	Vibrio coralliilyticus	PF00691	IPR006664|IPR006665
A0A097QWS8	Flagellar motor protein B	319	1453496	Gammaproteobacteria	Hafnia alvei FB1	PF00691|PF13677	IPR006665|IPR025713
A0A097QX97	Membrane protein	219	1453496	Gammaproteobacteria	Hafnia alvei FB1	PF00691|PF13488	IPR006664|IPR006665|IPR039567
A0A097R0C3	Peptidoglycan-associated protein	171	1453496	Gammaproteobacteria	Hafnia alvei FB1	PF00691	IPR006664|IPR006665|IPR014169
A0A097R117	Membrane protein	351	1453496	Gammaproteobacteria	Hafnia alvei FB1	PF00691|PF01389	IPR000498|IPR006664|IPR006665
A0A097R173	Cell envelope biogenesis protein OmpA	569	1453496	Gammaproteobacteria	Hafnia alvei FB1	PF00691	IPR006664|IPR006665
A0A097R1D1	Flagellar motor protein MotB	329	1453496	Gammaproteobacteria	Hafnia alvei FB1	PF00691|PF13677	IPR006665|IPR025713
A0A097R2Y8	Membrane protein	161	1453496	Gammaproteobacteria	Hafnia alvei FB1	PF00691	IPR006664|IPR006665
A0A098RBS2	Agglutination protein	584	42565	Gammaproteobacteria	Halomonas salina	PF00691|PF02321	IPR006664|IPR006665
A0A098RD06	Uncharacterized protein	332	42565	Gammaproteobacteria	Halomonas salina	PF00691|PF13677	IPR006665|IPR025713
A0A098RDA4	Flagellar motor protein MotB	222	42565	Gammaproteobacteria	Halomonas salina	PF00691|PF13677	IPR006665|IPR025713
A0A098RDK3	Flagellar motor protein MotB	319	42565	Gammaproteobacteria	Halomonas salina	PF00691|PF13677	IPR006665|IPR025713
A0A098RET8	Flagellar motor protein MotB	271	42565	Gammaproteobacteria	Halomonas salina	PF00691|PF02412	IPR006664|IPR006665
A0A098RGC8	Peptidoglycan-associated protein	179	42565	Gammaproteobacteria	Halomonas salina	PF00691	IPR006664|IPR006665|IPR014169
A0A098RIR2	Cell envelope biogenesis protein OmpA	223	42565	Gammaproteobacteria	Halomonas salina	PF00691|PF13488	IPR006664|IPR006665|IPR039567
A0A098SR19	Uncharacterized protein	221	243924	Gammaproteobacteria	Pseudomonas lutea	PF00691|PF13488	IPR006664|IPR006665|IPR039567
A0A098SST0	Cell envelope biogenesis protein OmpA	233	243924	Gammaproteobacteria	Pseudomonas lutea	PF00691|PF13488	IPR006664|IPR006665|IPR039567
A0A098STY6	Peptidoglycan-associated protein	167	243924	Gammaproteobacteria	Pseudomonas lutea	PF00691	IPR006664|IPR006665|IPR014169
A0A098SVG1	Flagellar motor protein MotB	351	243924	Gammaproteobacteria	Pseudomonas lutea	PF00691|PF13677	IPR006665|IPR025713
A0A098SWS3	Membrane protein	271	243924	Gammaproteobacteria	Pseudomonas lutea	PF00691|PF14346	IPR006664|IPR006665|IPR025511
A0A098T0N7	Porin	344	243924	Gammaproteobacteria	Pseudomonas lutea	PF00691|PF05736	IPR006664|IPR006665|IPR008722
A0A098T1D6	Flagellar motor protein MotD	293	243924	Gammaproteobacteria	Pseudomonas lutea	PF00691|PF13677	IPR006665|IPR025713
A0A098T1V3	Membrane protein	260	243924	Gammaproteobacteria	Pseudomonas lutea	PF00691|PF14346	IPR006664|IPR006665|IPR025511
A0A098T2I8	Membrane protein	367	243924	Gammaproteobacteria	Pseudomonas lutea	PF00691	IPR006665
A0A098T2Y6	Uncharacterized protein	600	243924	Gammaproteobacteria	Pseudomonas lutea	PF00691	IPR006664|IPR006665
A0A098T5X3	Membrane protein	233	243924	Gammaproteobacteria	Pseudomonas lutea	PF00691	IPR006664|IPR006665
A0A099CSV1	Peptidoglycan-associated protein	170	1543381	Gammaproteobacteria	Oleiagrimonas soli	PF00691	IPR006664|IPR006665|IPR014169
A0A099CUQ4	Flagellar motor protein MotB	387	1543381	Gammaproteobacteria	Oleiagrimonas soli	PF00691	IPR006664|IPR006665
A0A099CVS4	Uncharacterized protein	271	1543381	Gammaproteobacteria	Oleiagrimonas soli	PF00691|PF04355	IPR006664|IPR006665|IPR007450
A0A099CWS7	Membrane protein	193	1543381	Gammaproteobacteria	Oleiagrimonas soli	PF00691	IPR006664|IPR006665
A0A099CY59	Uncharacterized protein	335	1543381	Gammaproteobacteria	Oleiagrimonas soli	PF00691|PF16234	IPR006664|IPR006665
A0A099EUE3	Uncharacterized protein	176	690417	Alphaproteobacteria	Paracoccus sphaerophysae	PF00691	IPR006664|IPR006665
A0A099F1X4	Chemotaxis protein MotB	473	376733	Alphaproteobacteria	Paracoccus halophilus	PF00691	IPR006665
A0A099F3G4	Membrane protein	222	376733	Alphaproteobacteria	Paracoccus halophilus	PF00691|PF05433	IPR006664|IPR006665|IPR008816
A0A099F3W3	Membrane protein	218	690417	Alphaproteobacteria	Paracoccus sphaerophysae	PF00691	IPR006664|IPR006665
A0A099F914	Peptidoglycan-associated protein	169	376733	Alphaproteobacteria	Paracoccus halophilus	PF00691	IPR006664|IPR006665|IPR014169
A0A099FG49	Uncharacterized protein	744	690417	Alphaproteobacteria	Paracoccus sphaerophysae	PF00691	IPR006665
A0A099KC45	Uncharacterized protein	211	1535422	Gammaproteobacteria	Thalassotalea sp. ND16A	PF00691|PF13488	IPR006664|IPR006665|IPR039567
A0A099KDD6	Peptidoglycan-associated protein	182	1535422	Gammaproteobacteria	Thalassotalea sp. ND16A	PF00691	IPR006664|IPR006665|IPR014169
A0A099KIV7	Uncharacterized protein	261	1535422	Gammaproteobacteria	Thalassotalea sp. ND16A	PF00691	IPR006665
A0A099L2G9	Uncharacterized protein	2039	1535422	Gammaproteobacteria	Thalassotalea sp. ND16A	PF00691	IPR001434|IPR006664|IPR006665
A0A099LEI1	Uncharacterized protein	2581	1535422	Gammaproteobacteria	Thalassotalea sp. ND16A	PF00691|PF01389|PF17963	IPR000498|IPR006665
A0A099LEU7	Uncharacterized protein	268	1535422	Gammaproteobacteria	Thalassotalea sp. ND16A	PF00691	IPR006664|IPR006665
A0A099T5J9	Membrane protein	210	1225651	Alphaproteobacteria	Thalassobacter sp. 16PALIMAR09	PF00691	IPR006664|IPR006665
A0A099T6B9	Membrane protein	181	1225651	Alphaproteobacteria	Thalassobacter sp. 16PALIMAR09	PF00691	IPR006664|IPR006665
A0A099T755	Cell envelope biogenesis protein OmpA	301	1225651	Alphaproteobacteria	Thalassobacter sp. 16PALIMAR09	PF00691	IPR006664|IPR006665
A0A099T8N1	Flagellar motor protein	607	1225651	Alphaproteobacteria	Thalassobacter sp. 16PALIMAR09	PF00691	IPR006665
A0A099T9J8	Flagellar motor protein MotB	411	1225651	Alphaproteobacteria	Thalassobacter sp. 16PALIMAR09	PF00691|PF13677	IPR006665|IPR025713
A0A099TA05	Peptidoglycan-associated protein	176	1225651	Alphaproteobacteria	Thalassobacter sp. 16PALIMAR09	PF00691	IPR006664|IPR006665|IPR014169
A0A099TC54	Membrane protein	221	1225651	Alphaproteobacteria	Thalassobacter sp. 16PALIMAR09	PF00691|PF13488	IPR006664|IPR006665|IPR039567
A0A099TC72	Membrane protein	638	1225651	Alphaproteobacteria	Thalassobacter sp. 16PALIMAR09	PF00691	IPR006664|IPR006665
A0A099TY86	Flagellar motor protein	252	216	Epsilonproteobacteria	Helicobacter muridarum	PF00691|PF13677	IPR006665|IPR025713
A0A099TYR7	Outer membrane protein and related peptidoglycan-associated (Lipo)proteins	242	216	Epsilonproteobacteria	Helicobacter muridarum	PF00691	IPR006665
A0A099TYY1	Peptidoglycan-associated lipoprotein	220	216	Epsilonproteobacteria	Helicobacter muridarum	PF00691	IPR006664|IPR006665
A0A0A0CZI2	Flagellar motor protein MotB	388	1398085	Alphaproteobacteria	Inquilinus limosus MP06	PF00691|PF09850	IPR006665|IPR017732|IPR017733
A0A0A0CZW2	Uncharacterized protein	446	1398085	Alphaproteobacteria	Inquilinus limosus MP06	PF00691	IPR006664|IPR006665
A0A0A0D070	Peptidoglycan-associated protein	158	1398085	Alphaproteobacteria	Inquilinus limosus MP06	PF00691	IPR006664|IPR006665|IPR014169
A0A0A0D2P1	Uncharacterized protein	335	1398085	Alphaproteobacteria	Inquilinus limosus MP06	PF00691|PF13505	IPR006664|IPR006665|IPR027385
A0A0A0D2Q6	Uncharacterized protein	163	1398085	Alphaproteobacteria	Inquilinus limosus MP06	PF00691	IPR006664|IPR006665
A0A0A0D3Z6	Uncharacterized protein	321	1398085	Alphaproteobacteria	Inquilinus limosus MP06	PF00691|PF13505	IPR006315|IPR006664|IPR006665|IPR027385
A0A0A0D9S7	Uncharacterized protein	127	1398085	Alphaproteobacteria	Inquilinus limosus MP06	PF00691	IPR006664|IPR006665
A0A0A0DD99	Uncharacterized protein	220	1398085	Alphaproteobacteria	Inquilinus limosus MP06	PF00691	IPR006665
A0A0A0DDR4	Uncharacterized protein	321	1398085	Alphaproteobacteria	Inquilinus limosus MP06	PF00691|PF16234	IPR006664|IPR006665
A0A0A0DLP6	Uncharacterized protein	267	1538295	Betaproteobacteria	Aquabacterium sp. NJ1	PF00691	IPR006664|IPR006665
A0A0A0DQV4	Uncharacterized protein	190	1538295	Betaproteobacteria	Aquabacterium sp. NJ1	PF00691	IPR006664|IPR006665
A0A0A0DSZ7	Membrane protein	214	1538295	Betaproteobacteria	Aquabacterium sp. NJ1	PF00691	IPR006664|IPR006665
A0A0A0DTH6	Uncharacterized protein	450	1538295	Betaproteobacteria	Aquabacterium sp. NJ1	PF00691|PF09850	IPR006665|IPR017732|IPR017733
A0A0A0DU49	Uncharacterized protein	216	1538295	Betaproteobacteria	Aquabacterium sp. NJ1	PF00691	IPR006665
A0A0A0DUP5	Peptidoglycan-associated protein	181	1538295	Betaproteobacteria	Aquabacterium sp. NJ1	PF00691	IPR006664|IPR006665|IPR014169
A0A0A0DV74	Membrane protein	219	1538295	Betaproteobacteria	Aquabacterium sp. NJ1	PF00691|PF13441	IPR006664|IPR006665|IPR027367
A0A0A0DWS5	Peptidoglycan-associated protein	181	1538295	Betaproteobacteria	Aquabacterium sp. NJ1	PF00691	IPR006664|IPR006665|IPR014169
A0A0A0EK55	Uncharacterized protein	162	1122185	Gammaproteobacteria	Lysobacter concretionis Ko07 = DSM 16239	PF00691	IPR006664|IPR006665
A0A0A0ENK9	Uncharacterized protein	220	1122185	Gammaproteobacteria	Lysobacter concretionis Ko07 = DSM 16239	PF00691	IPR006665
A0A0A0EQ01	Peptidoglycan-associated protein	170	1122185	Gammaproteobacteria	Lysobacter concretionis Ko07 = DSM 16239	PF00691	IPR006664|IPR006665|IPR014169
A0A0A0ESP7	Cell envelope biogenesis protein OmpA	230	1122185	Gammaproteobacteria	Lysobacter concretionis Ko07 = DSM 16239	PF00691|PF13488	IPR006664|IPR006665|IPR039567
A0A0A0HIZ8	Outer membrane protein	191	1288298	Alphaproteobacteria	Roseovarius mucosus DSM 17069	PF00691	IPR006665
A0A0A0HJX7	Outer membrane protein	635	1288298	Alphaproteobacteria	Roseovarius mucosus DSM 17069	PF00691	IPR006664|IPR006665
A0A0A0HK53	Outer membrane protein	308	1288298	Alphaproteobacteria	Roseovarius mucosus DSM 17069	PF00691	IPR006665
A0A0A0HMJ9	Flagellar motor protein	586	1288298	Alphaproteobacteria	Roseovarius mucosus DSM 17069	PF00691	IPR006665
A0A0A0HMZ9	Outer membrane protein	220	1288298	Alphaproteobacteria	Roseovarius mucosus DSM 17069	PF00691	IPR006664|IPR006665
A0A0A0HNU5	Flagellar motor protein	383	1288298	Alphaproteobacteria	Roseovarius mucosus DSM 17069	PF00691|PF13677	IPR006665|IPR025713
A0A0A0HSR3	Outer membrane protein	193	1288298	Alphaproteobacteria	Roseovarius mucosus DSM 17069	PF00691|PF13488	IPR006664|IPR006665|IPR039567
A0A0A0HSV4	Peptidoglycan-associated protein	170	1288298	Alphaproteobacteria	Roseovarius mucosus DSM 17069	PF00691	IPR006664|IPR006665|IPR014169
A0A0A0SR52	Uncharacterized protein	222	190893	Gammaproteobacteria	Vibrio coralliilyticus	PF00691|PF13488	IPR006664|IPR006665|IPR039567
A0A0A1H0M6	Uncharacterized protein	237	1469502	Betaproteobacteria	Burkholderiales bacterium GJ-E10	PF00691	IPR006665
A0A0A1H440	Outer membrane protein A	223	1469502	Betaproteobacteria	Burkholderiales bacterium GJ-E10	PF00691	IPR006664|IPR006665
A0A0A1H4A6	Peptidoglycan-associated protein	171	1469502	Betaproteobacteria	Burkholderiales bacterium GJ-E10	PF00691	IPR006664|IPR006665|IPR014169
A0A0A1H4B8	Peptidoglycan-associated protein	181	1469502	Betaproteobacteria	Burkholderiales bacterium GJ-E10	PF00691	IPR006664|IPR006665|IPR014169
A0A0A1H8G4	OmpA/MotB	320	1469502	Betaproteobacteria	Burkholderiales bacterium GJ-E10	PF00691|PF13677	IPR006665|IPR025713
A0A0A1YF51	Flagellar motor protein MotB	188	1395571	Gammaproteobacteria	Pseudomonas taeanensis MS-3	PF00691	IPR006664|IPR006665
A0A0A1YFB8	Peptidoglycan-associated protein	165	1395571	Gammaproteobacteria	Pseudomonas taeanensis MS-3	PF00691	IPR006664|IPR006665|IPR014169
A0A0A1YG62	Membrane protein	270	1395571	Gammaproteobacteria	Pseudomonas taeanensis MS-3	PF00691|PF14346	IPR006664|IPR006665|IPR025511
A0A0A1YGR9	Membrane protein	218	1395571	Gammaproteobacteria	Pseudomonas taeanensis MS-3	PF00691|PF13488	IPR006664|IPR006665|IPR039567
A0A0A1YHZ5	Membrane protein	209	1395571	Gammaproteobacteria	Pseudomonas taeanensis MS-3	PF00691	IPR006664|IPR006665
A0A0A1YJ73	Membrane protein	307	1395571	Gammaproteobacteria	Pseudomonas taeanensis MS-3	PF00691|PF18393	IPR006664|IPR006665|IPR041544
A0A0A1YJX8	Membrane protein	460	1395571	Gammaproteobacteria	Pseudomonas taeanensis MS-3	PF00691|PF12849	IPR006665|IPR024370
A0A0A1YLF5	Porin	321	1395571	Gammaproteobacteria	Pseudomonas taeanensis MS-3	PF00691|PF05736	IPR006664|IPR006665|IPR008722
A0A0A1YNI3	Flagellar motor protein MotB	341	1395571	Gammaproteobacteria	Pseudomonas taeanensis MS-3	PF00691|PF13677	IPR006665|IPR025713
A0A0A2HS52	Peptidoglycan-associated protein	187	1536652	Deltaproteobacteria	Desulfobulbus sp. Tol-SR	PF00691	IPR006664|IPR006665|IPR014169
A0A0A2HT12	Uncharacterized protein	336	1536652	Deltaproteobacteria	Desulfobulbus sp. Tol-SR	PF00092|PF00691	IPR002035|IPR006664|IPR006665
A0A0A2I5X9	Peptidoglycan-associated protein	164	1536652	Deltaproteobacteria	Desulfobulbus sp. Tol-SR	PF00691	IPR006664|IPR006665
A0A0A2WG80	Peptidoglycan-associated protein	175	1300345	Gammaproteobacteria	Lysobacter dokdonensis DS-58	PF00691	IPR006664|IPR006665|IPR014169
A0A0A2WGY8	OmpA/MotB domain protein	369	1300345	Gammaproteobacteria	Lysobacter dokdonensis DS-58	PF00691|PF13505	IPR006664|IPR006665|IPR027385
A0A0A2WHY6	Outer membrane protein| OmpA/MotB family	265	1300345	Gammaproteobacteria	Lysobacter dokdonensis DS-58	PF00691	IPR006664|IPR006665
A0A0A2WNG7	Cell envelope biogenesis protein OmpA	228	1300345	Gammaproteobacteria	Lysobacter dokdonensis DS-58	PF00691|PF13441	IPR006664|IPR006665|IPR027367
A0A0A2X6D3	OmpA domain protein	97	1300345	Gammaproteobacteria	Lysobacter dokdonensis DS-58	PF00691	IPR006664|IPR006665
A0A0A3AJ45	Membrane protein	312	505317	Gammaproteobacteria	Chelonobacter oris	PF00691|PF01389	IPR000498|IPR006664|IPR006665
A0A0A3AJD5	Uncharacterized protein	306	505317	Gammaproteobacteria	Chelonobacter oris	PF00691	IPR006665
A0A0A3ALH6	Plastocyanin	251	505317	Gammaproteobacteria	Chelonobacter oris	PF00691|PF04355	IPR006664|IPR006665|IPR007450
A0A0A3ANM8	Peptidoglycan-associated protein	151	505317	Gammaproteobacteria	Chelonobacter oris	PF00691	IPR006664|IPR006665|IPR014169
A0A0A3AP01	Uncharacterized protein	302	505317	Gammaproteobacteria	Chelonobacter oris	PF00691	IPR006664|IPR006665
A0A0A3AQ36	Plastocyanin	247	505317	Gammaproteobacteria	Chelonobacter oris	PF00691|PF04355	IPR006664|IPR006665|IPR007450
A0A0A6NYR8	Protein containing Outer membrane protein| OmpA/MotB	224	1003181	Gammaproteobacteria	Candidatus Thiomargarita nelsonii	PF00691	IPR006665
A0A0A6NYU5	Protein containing Outer membrane protein| OmpA/MotB	213	1003181	Gammaproteobacteria	Candidatus Thiomargarita nelsonii	PF00691	IPR006664|IPR006665
A0A0A6P0F8	Protein containing Outer membrane protein| OmpA/MotB	74	1003181	Gammaproteobacteria	Candidatus Thiomargarita nelsonii	PF00691	IPR006665
A0A0A6P132	Peptidoglycan-associated protein	187	1003181	Gammaproteobacteria	Candidatus Thiomargarita nelsonii	PF00691	IPR006664|IPR006665|IPR014169
A0A0A6P3W6	Uncharacterized protein	107	1003181	Gammaproteobacteria	Candidatus Thiomargarita nelsonii	PF00691	IPR006665
A0A0A6PAW5	Peptidoglycan-associated protein	188	1003181	Gammaproteobacteria	Candidatus Thiomargarita nelsonii	PF00691	IPR006664|IPR006665|IPR014169
A0A0A6PC62	Uncharacterized protein	251	1003181	Gammaproteobacteria	Candidatus Thiomargarita nelsonii	PF00691	IPR006664|IPR006665
A0A0A6PDK8	Uncharacterized protein	181	1003181	Gammaproteobacteria	Candidatus Thiomargarita nelsonii	PF00691	IPR006664|IPR006665
A0A0A6PEB2	Uncharacterized protein	225	1003181	Gammaproteobacteria	Candidatus Thiomargarita nelsonii	PF00691	IPR006665
A0A0A6PEV5	Uncharacterized protein	117	1003181	Gammaproteobacteria	Candidatus Thiomargarita nelsonii	PF00691	IPR006665
A0A0A6PL89	Uncharacterized protein	402	1003181	Gammaproteobacteria	Candidatus Thiomargarita nelsonii	PF00691	IPR006665|IPR013026
A0A0A6Q2B1	Uncharacterized protein	443	159450	Betaproteobacteria	Paraburkholderia sacchari	PF00691|PF09850	IPR006665|IPR017732|IPR017733
A0A0A6Q3H0	Flagellar motor protein MotB	556	159450	Betaproteobacteria	Paraburkholderia sacchari	PF00691	IPR006664|IPR006665
A0A0A6Q4C2	Flagellar motor protein MotB	354	159450	Betaproteobacteria	Paraburkholderia sacchari	PF00691	IPR006665
A0A0A6Q513	RND transporter	544	159450	Betaproteobacteria	Paraburkholderia sacchari	PF00691|PF16576	IPR006664|IPR006665|IPR032317
A0A0A6Q6J6	Flagellar motor protein MotB	582	159450	Betaproteobacteria	Paraburkholderia sacchari	PF00691	IPR006665
A0A0A6Q7T4	Flagellar motor protein MotB	342	159450	Betaproteobacteria	Paraburkholderia sacchari	PF00691|PF13677	IPR006665|IPR025713
A0A0A6QBM7	Uncharacterized protein	222	159450	Betaproteobacteria	Paraburkholderia sacchari	PF00691	IPR006665
A0A0A6QBV0	Membrane protein	217	159450	Betaproteobacteria	Paraburkholderia sacchari	PF00691|PF13441	IPR006664|IPR006665|IPR027367
A0A0A6QC89	Motility protein B	226	159450	Betaproteobacteria	Paraburkholderia sacchari	PF00691|PF13677	IPR006665|IPR025713
A0A0A6QG39	Peptidoglycan-associated protein	168	159450	Betaproteobacteria	Paraburkholderia sacchari	PF00691	IPR006664|IPR006665|IPR014169
A0A0A6QGI5	Membrane protein	216	159450	Betaproteobacteria	Paraburkholderia sacchari	PF00691	IPR006664|IPR006665
A0A0A6QGJ4	Uncharacterized protein	235	159450	Betaproteobacteria	Paraburkholderia sacchari	PF00691	IPR006664|IPR006665
A0A0A6QGP3	Cytochrome c oxidase subunit 2	535	159450	Betaproteobacteria	Paraburkholderia sacchari	PF00116|PF00691|PF02790|PF13442	IPR002429|IPR006664|IPR006665|IPR009056|IPR011759|IPR014222
A0A0A6QHQ0	Uncharacterized protein	421	159450	Betaproteobacteria	Paraburkholderia sacchari	PF00691|PF09850	IPR006665|IPR017732|IPR017733
A0A0A6QIS8	Flagellar motor protein MotB	202	159450	Betaproteobacteria	Paraburkholderia sacchari	PF00691	IPR006664|IPR006665
A0A0A6RNR8	Uncharacterized protein	306	1003181	Gammaproteobacteria	Candidatus Thiomargarita nelsonii	PF00691	IPR006664|IPR006665
A0A0A6RSL7	Uncharacterized protein	310	1003181	Gammaproteobacteria	Candidatus Thiomargarita nelsonii	PF00691|PF13414	IPR006665|IPR013026
A0A0A6RWG0	Uncharacterized protein	166	1003181	Gammaproteobacteria	Candidatus Thiomargarita nelsonii	PF00691	IPR006665
A0A0A7EBT3	Uncharacterized protein	499	1348114	Gammaproteobacteria	Pseudoalteromonas piratica	PF00691	IPR006664|IPR006665
A0A0A7EEM5	Chemotaxis protein	320	1348114	Gammaproteobacteria	Pseudoalteromonas piratica	PF00691|PF13677	IPR006665|IPR025713
A0A0A7EF04	Peptidoglycan-associated protein	175	1348114	Gammaproteobacteria	Pseudoalteromonas piratica	PF00691	IPR006664|IPR006665|IPR014169
A0A0A7EF96	Uncharacterized protein	241	1348114	Gammaproteobacteria	Pseudoalteromonas piratica	PF00691	IPR006664|IPR006665
A0A0A7EH56	Membrane protein	293	1348114	Gammaproteobacteria	Pseudoalteromonas piratica	PF00691|PF18393	IPR006664|IPR006665|IPR041544
A0A0A7EHI6	Flagellar motor protein MotB	303	1348114	Gammaproteobacteria	Pseudoalteromonas piratica	PF00691|PF13677	IPR006665|IPR025713
A0A0A7EHU6	Membrane protein	209	1348114	Gammaproteobacteria	Pseudoalteromonas piratica	PF00691|PF13488	IPR006664|IPR006665|IPR039567
A0A0A7EIE9	Chemotaxis protein MotB	247	1348114	Gammaproteobacteria	Pseudoalteromonas piratica	PF00691	IPR006665
A0A0A7EIY8	Cell envelope biogenesis protein OmpA	557	1348114	Gammaproteobacteria	Pseudoalteromonas piratica	PF00691|PF12849	IPR006665|IPR024370
A0A0A7EJT1	Uncharacterized protein	369	1348114	Gammaproteobacteria	Pseudoalteromonas piratica	PF00691|PF02412	IPR006664|IPR006665
A0A0A7EL28	Uncharacterized protein	710	1348114	Gammaproteobacteria	Pseudoalteromonas piratica	PF00400|PF00691|PF03781	IPR005532|IPR006664|IPR006665|IPR017986
A0A0A7ENK9	Uncharacterized protein	276	1348114	Gammaproteobacteria	Pseudoalteromonas piratica	PF00691	IPR006664|IPR006665
A0A0A7RXQ5	Flagellar motor protein	316	1267021	Gammaproteobacteria	Frischella perrara	PF00691|PF13677	IPR006665|IPR025713
A0A0A7S182	Peptidoglycan-associated protein	157	1267021	Gammaproteobacteria	Frischella perrara	PF00691	IPR006664|IPR006665|IPR014169
A0A0A7S2N0	Outer membrane protein	591	1267021	Gammaproteobacteria	Frischella perrara	PF00691	IPR006665
A0A0A7S308	Outer membrane protein	351	1267021	Gammaproteobacteria	Frischella perrara	PF00691|PF01389	IPR000498|IPR006664|IPR006665
A0A0A8GZK8	Outer membrane fibronectin-binding protein	325	1031564	Epsilonproteobacteria	Campylobacter insulaenigrae NCTC 12927	PF00691|PF13505	IPR006664|IPR006665|IPR027385
A0A0A8H083	Peptidoglycan-associated protein	162	1031564	Epsilonproteobacteria	Campylobacter insulaenigrae NCTC 12927	PF00691	IPR006664|IPR006665
A0A0A8H1B4	Uncharacterized protein	320	1031564	Epsilonproteobacteria	Campylobacter insulaenigrae NCTC 12927	PF00691	IPR006665
A0A0A8H2N8	Flagellar motor protein	244	1031564	Epsilonproteobacteria	Campylobacter insulaenigrae NCTC 12927	PF00691|PF13677	IPR006665|IPR025713
A0A0A8K6Q1	18K peptidoglycan-associated outer membrane lipoprotein	186	1384459	Alphaproteobacteria	Methyloceanibacter caenitepidi	PF00691	IPR006664|IPR006665
A0A0A8K6R8	Flagellar motor rotation protein MotB	342	1384459	Alphaproteobacteria	Methyloceanibacter caenitepidi	PF00691	IPR006665
A0A0A8K932	Major porin and structural outer membrane porin OprF	494	1384459	Alphaproteobacteria	Methyloceanibacter caenitepidi	PF00691	IPR006664|IPR006665
A0A0A8WKY7	Outer membrane porin F	463	1266765	Deltaproteobacteria	Geobacter sp. OR-1	PF00691|PF13505	IPR006664|IPR006665|IPR027385|IPR030820
A0A0A8WKZ3	Putative lipoprotein YiaD	439	1266765	Deltaproteobacteria	Geobacter sp. OR-1	PF00691	IPR006664|IPR006665
A0A0A8WLN8	Outer membrane protein A	201	1266765	Deltaproteobacteria	Geobacter sp. OR-1	PF00691	IPR006665
A0A0A8WNC4	Peptidoglycan-associated protein	194	1266765	Deltaproteobacteria	Geobacter sp. OR-1	PF00691	IPR006664|IPR006665|IPR014169
A0A0A8WQB0	Putative 24.6 kDa protein in ccpA 3'region	298	1266765	Deltaproteobacteria	Geobacter sp. OR-1	PF00691	IPR006665
A0A0A8WRL3	Motility protein B	262	1266765	Deltaproteobacteria	Geobacter sp. OR-1	PF00691|PF13677	IPR006665|IPR025713
A0A0A8WXQ6	Outer membrane protein A	509	1266765	Deltaproteobacteria	Geobacter sp. OR-1	PF00691	IPR006664|IPR006665
A0A0B0H2G9	Peptidoglycan-associated protein	146	2340	Gammaproteobacteria	Solemya velum gill symbiont	PF00691	IPR006664|IPR006665|IPR014169
A0A0B0H8V5	Outer membrane protein OmpA1	165	2340	Gammaproteobacteria	Solemya velum gill symbiont	PF00691	IPR006664|IPR006665
A0A0B0HBN7	Flagellar motor protein MotB	228	2340	Gammaproteobacteria	Solemya velum gill symbiont	PF00691|PF13488	IPR006664|IPR006665|IPR039567
A0A0B1Q205	Peptidoglycan-associated protein	176	370622	Alphaproteobacteria	Aureimonas altamirensis	PF00691	IPR006664|IPR006665|IPR014169
A0A0B1Q2J4	Uncharacterized protein	347	370622	Alphaproteobacteria	Aureimonas altamirensis	PF00691	IPR006664|IPR006665
A0A0B1Q3Q2	Cell envelope biogenesis protein OmpA	221	370622	Alphaproteobacteria	Aureimonas altamirensis	PF00691|PF13488	IPR006664|IPR006665|IPR039567
A0A0B1QAL2	Uncharacterized protein	342	370622	Alphaproteobacteria	Aureimonas altamirensis	PF00691	IPR006665
A0A0B1Y2Q2	Uncharacterized protein	216	1217052	Betaproteobacteria	Ralstonia sp. A12	PF00691	IPR006665
A0A0B1Y671	Cell envelope biogenesis protein OmpA	278	1217052	Betaproteobacteria	Ralstonia sp. A12	PF00691	IPR006664|IPR006665
A0A0B1Y7R5	Flagellar motor protein MotB	315	1217052	Betaproteobacteria	Ralstonia sp. A12	PF00691|PF13677	IPR006665|IPR025713
A0A0B1YG24	Cell envelope biogenesis protein OmpA	319	1217052	Betaproteobacteria	Ralstonia sp. A12	PF00691|PF16234	IPR006664|IPR006665
A0A0B1YH71	Peptidoglycan-associated protein	172	1217052	Betaproteobacteria	Ralstonia sp. A12	PF00691	IPR006664|IPR006665|IPR014169
A0A0B1YK79	Flagellar motor protein MotB	236	1217052	Betaproteobacteria	Ralstonia sp. A12	PF00691	IPR006665
A0A0B1YKX9	Membrane protein	209	1217052	Betaproteobacteria	Ralstonia sp. A12	PF00691|PF13441	IPR006664|IPR006665|IPR027367
A0A0B1YPX2	Membrane protein	217	1217052	Betaproteobacteria	Ralstonia sp. A12	PF00691	IPR006664|IPR006665
A0A0B1ZHU3	Peptidoglycan-associated protein	162	1348853	Alphaproteobacteria	Novosphingobium malaysiense	PF00691	IPR006664|IPR006665|IPR014169
A0A0B1ZKW3	OmpA family protein	286	1348853	Alphaproteobacteria	Novosphingobium malaysiense	PF00691	IPR006664|IPR006665
A0A0B1ZNR2	Membrane protein	224	1348853	Alphaproteobacteria	Novosphingobium malaysiense	PF00691|PF13488	IPR006664|IPR006665|IPR039567
A0A0B1ZQQ9	Flagellar motor protein	279	1348853	Alphaproteobacteria	Novosphingobium malaysiense	PF00691|PF13677	IPR006665|IPR025713
A0A0B1ZSI1	Flagellar motor protein MotB	340	1348853	Alphaproteobacteria	Novosphingobium malaysiense	PF00691|PF13505	IPR006664|IPR006665|IPR027385
A0A0B1ZW95	Membrane protein	241	1348853	Alphaproteobacteria	Novosphingobium malaysiense	PF00691	IPR006664|IPR006665
A0A0B2BSY6	Flagellar motor protein MotB	371	1572751	Alphaproteobacteria	Porphyrobacter mercurialis	PF00691|PF13505	IPR006664|IPR006665|IPR027385
A0A0B2BWI7	OmpA family protein	292	1572751	Alphaproteobacteria	Porphyrobacter mercurialis	PF00691	IPR006664|IPR006665
A0A0B2BWM1	Uncharacterized protein	384	1572751	Alphaproteobacteria	Porphyrobacter mercurialis	PF00691	IPR006664|IPR006665
A0A0B2BZ14	Membrane protein	217	1572751	Alphaproteobacteria	Porphyrobacter mercurialis	PF00691|PF13488	IPR006664|IPR006665|IPR039567
A0A0B2C0B7	Flagellar motor protein	277	1572751	Alphaproteobacteria	Porphyrobacter mercurialis	PF00691|PF13677	IPR006665|IPR025713
A0A0B2C3P9	Peptidoglycan-associated protein	157	1572751	Alphaproteobacteria	Porphyrobacter mercurialis	PF00691	IPR006664|IPR006665|IPR014169
A0A0B3BHB4	Membrane protein	298	706570	Gammaproteobacteria	Pseudomonas flexibilis	PF00691|PF13677	IPR006665|IPR025713
A0A0B3BM92	Uncharacterized protein	195	706570	Gammaproteobacteria	Pseudomonas flexibilis	PF00691	IPR006665
A0A0B3BPL8	Flagellar motor protein MotB	327	706570	Gammaproteobacteria	Pseudomonas flexibilis	PF00691|PF13677	IPR006665|IPR025713
A0A0B3BSD1	Chemotaxis protein MotB	292	706570	Gammaproteobacteria	Pseudomonas flexibilis	PF00691|PF13677	IPR006665|IPR025713
A0A0B3BTG5	Porin	326	706570	Gammaproteobacteria	Pseudomonas flexibilis	PF00691|PF05736	IPR006664|IPR006665|IPR008722
A0A0B3BTL2	Membrane protein	198	706570	Gammaproteobacteria	Pseudomonas flexibilis	PF00691	IPR006664|IPR006665
A0A0B3BX87	Peptidoglycan-associated protein	170	706570	Gammaproteobacteria	Pseudomonas flexibilis	PF00691	IPR006664|IPR006665|IPR014169
A0A0B3BXB0	Membrane protein	220	706570	Gammaproteobacteria	Pseudomonas flexibilis	PF00691|PF13488	IPR006664|IPR006665|IPR039567
A0A0B3RIW7	OmpA family protein	198	561184	Alphaproteobacteria	Mameliella alba	PF00691	IPR006665
A0A0B3RNM0	Flagellar motor rotation protein MotB	1153	561184	Alphaproteobacteria	Mameliella alba	PF00691	IPR006665
A0A0B3RRS3	Putative outer membrane protein OprF	304	561184	Alphaproteobacteria	Mameliella alba	PF00691	IPR006664|IPR006665
A0A0B3RVP4	OmpA/MotB	216	561184	Alphaproteobacteria	Mameliella alba	PF00691	IPR006664|IPR006665
A0A0B3RVT3	OmpA/MotB	266	561184	Alphaproteobacteria	Mameliella alba	PF00691	IPR006664|IPR006665
A0A0B3RVU8	OmpA/MotB	161	561184	Alphaproteobacteria	Mameliella alba	PF00691	IPR006665
A0A0B3RWM0	OmpA/MotB	222	561184	Alphaproteobacteria	Mameliella alba	PF00691	IPR006664|IPR006665
A0A0B3RZK3	OmpA/MotB	517	561184	Alphaproteobacteria	Mameliella alba	PF00691|PF12849	IPR006665|IPR024370
A0A0B3RZZ9	Outer membrane protein| OmpA/MotB family	549	561184	Alphaproteobacteria	Mameliella alba	PF00691	IPR006665
A0A0B3S0V4	Peptidoglycan-associated protein	171	561184	Alphaproteobacteria	Mameliella alba	PF00691	IPR006664|IPR006665|IPR014169
A0A0B3S0W1	OmpA-domain-containing protein	727	561184	Alphaproteobacteria	Mameliella alba	PF00691|PF04972	IPR006665|IPR007055
A0A0B3S194	OmpA domain protein	313	561184	Alphaproteobacteria	Mameliella alba	PF00691	IPR006664|IPR006665
A0A0B3S3U8	Outer membrane protein	564	561184	Alphaproteobacteria	Mameliella alba	PF00691	IPR006664|IPR006665
A0A0B3S475	Putative outer membrane protein OprF	227	561184	Alphaproteobacteria	Mameliella alba	PF00691	IPR006664|IPR006665
A0A0B3S6E9	Membrane protein	218	561184	Alphaproteobacteria	Mameliella alba	PF00691	IPR006664|IPR006665
A0A0B3SEJ7	OmpA domain protein	668	561184	Alphaproteobacteria	Mameliella alba	PF00691	IPR006664|IPR006665
A0A0B3SSP0	Membrane protein	219	561184	Alphaproteobacteria	Mameliella alba	PF00691|PF05433	IPR006664|IPR006665|IPR008816
A0A0B4BVV4	Membrane protein	638	1577905	Alphaproteobacteria	Tateyamaria sp. ANG-S1	PF00691	IPR006664|IPR006665
A0A0B4C1F5	Flagellar motor protein	648	1577905	Alphaproteobacteria	Tateyamaria sp. ANG-S1	PF00691	IPR006665
A0A0B4C519	Chemotaxis protein MotB	279	1577905	Alphaproteobacteria	Tateyamaria sp. ANG-S1	PF00691|PF13677	IPR006665|IPR025713
A0A0B4C9M9	Peptidoglycan-associated protein	173	1577905	Alphaproteobacteria	Tateyamaria sp. ANG-S1	PF00691	IPR006664|IPR006665|IPR014169
A0A0B4CCX4	Cell envelope biogenesis protein OmpA	517	1577905	Alphaproteobacteria	Tateyamaria sp. ANG-S1	PF00691|PF12849	IPR006665|IPR024370
A0A0B4CHK7	Cell envelope biogenesis protein OmpA	199	1577905	Alphaproteobacteria	Tateyamaria sp. ANG-S1	PF00691	IPR006665
A0A0B4CIR8	Membrane protein	220	1577905	Alphaproteobacteria	Tateyamaria sp. ANG-S1	PF00691|PF13441	IPR006664|IPR006665|IPR027367
A0A0B4CZ99	Membrane protein	472	1577905	Alphaproteobacteria	Tateyamaria sp. ANG-S1	PF00691|PF09850	IPR006665|IPR017732|IPR017733
A0A0B4CZB5	Uncharacterized protein	472	1577905	Alphaproteobacteria	Tateyamaria sp. ANG-S1	PF00691|PF09850	IPR006665|IPR017732
A0A0B4D9A2	Membrane protein	221	1577905	Alphaproteobacteria	Tateyamaria sp. ANG-S1	PF00691	IPR006664|IPR006665
A0A0B4DBA3	Uncharacterized protein	308	1577905	Alphaproteobacteria	Tateyamaria sp. ANG-S1	PF00691	IPR006665
A0A0B4E4P2	Cell envelope biogenesis protein OmpA	191	1002340	Alphaproteobacteria	Leisingera sp. ANG1	PF00691	IPR006664|IPR006665
A0A0B4E5W1	Membrane protein	209	1002340	Alphaproteobacteria	Leisingera sp. ANG1	PF00691	IPR006664|IPR006665
A0A0B4E5X9	Peptidoglycan-associated protein	168	1002340	Alphaproteobacteria	Leisingera sp. ANG1	PF00691	IPR006664|IPR006665|IPR014169
A0A0B4E9G2	Membrane protein	475	1002340	Alphaproteobacteria	Leisingera sp. ANG1	PF00691|PF09850	IPR006665|IPR017732|IPR017733
A0A0B4E9G9	Flagellar motor protein MotB	191	1002340	Alphaproteobacteria	Leisingera sp. ANG1	PF00691	IPR006664|IPR006665
A0A0B4EAF5	Cell envelope biogenesis protein OmpA	517	1002340	Alphaproteobacteria	Leisingera sp. ANG1	PF00691|PF12849	IPR006665|IPR024370
A0A0B4EE35	Membrane protein	219	1002340	Alphaproteobacteria	Leisingera sp. ANG1	PF00691|PF13441	IPR006664|IPR006665|IPR027367
A0A0B4ELP1	Flagellar motor protein	613	1002340	Alphaproteobacteria	Leisingera sp. ANG1	PF00691	IPR006665
A0A0B4F924	Uncharacterized protein	346	1002340	Alphaproteobacteria	Leisingera sp. ANG1	PF00691|PF04264	IPR006664|IPR006665|IPR007372
A0A0B4FA06	Membrane protein	693	1002340	Alphaproteobacteria	Leisingera sp. ANG1	PF00691	IPR006665
A0A0B4FDS4	Membrane protein	629	1002340	Alphaproteobacteria	Leisingera sp. ANG1	PF00691	IPR006664|IPR006665
A0A0B4FE13	Cell envelope biogenesis protein OmpA	302	1002340	Alphaproteobacteria	Leisingera sp. ANG1	PF00691	IPR006664|IPR006665
A0A0B4X0K5	Flagellar motor protein MotB	428	1418105	Alphaproteobacteria	Rhizobium gallicum bv. gallicum R602	PF00691|PF13677	IPR006665|IPR025713
A0A0B4X3M8	OmpA/MotB family outer membrane protein	343	1418105	Alphaproteobacteria	Rhizobium gallicum bv. gallicum R602	PF00691	IPR006665
A0A0B4X481	OmpA/MotB family outer membrane protein	708	1418105	Alphaproteobacteria	Rhizobium gallicum bv. gallicum R602	PF00691	IPR006665
A0A0B4X5J6	OmpA/MotB family outer membrane protein	221	1418105	Alphaproteobacteria	Rhizobium gallicum bv. gallicum R602	PF00691|PF13488	IPR006664|IPR006665|IPR039567
A0A0B4X6R2	OmpA/MotB family outer membrane protein	967	1418105	Alphaproteobacteria	Rhizobium gallicum bv. gallicum R602	PF00691	IPR006665
A0A0B4X857	Peptidoglycan-associated protein	175	1418105	Alphaproteobacteria	Rhizobium gallicum bv. gallicum R602	PF00691	IPR006664|IPR006665|IPR014169
A0A0B4X8P0	LolA family outer membrane lipoprotein carrier protein	418	1418105	Alphaproteobacteria	Rhizobium gallicum bv. gallicum R602	PF00691|PF09865	IPR006664|IPR006665
A0A0B4XBP5	Type VI secretion system DotU/OmpA/MotB outer membrane protein	439	1418105	Alphaproteobacteria	Rhizobium gallicum bv. gallicum R602	PF00691|PF09850	IPR006665|IPR017732
A0A0B4XBV6	Outer membrane lipoprotein	180	1418105	Alphaproteobacteria	Rhizobium gallicum bv. gallicum R602	PF00691	IPR006664|IPR006665
A0A0B4XE98	OmpA/MotB family outer membrane protein	248	1418105	Alphaproteobacteria	Rhizobium gallicum bv. gallicum R602	PF00691	IPR006664|IPR006665
A0A0B4XFU9	Type VI secretion system DotU/OmpA/MotB outer membrane protein	515	1418105	Alphaproteobacteria	Rhizobium gallicum bv. gallicum R602	PF00691|PF09850	IPR006665|IPR017732|IPR017733
A0A0B4XH61	Outer membrane protein/peptidoglycan-associated (Lipo)protein	196	391936	Gammaproteobacteria	Alcanivorax pacificus W11-5	PF00691	IPR006664|IPR006665
A0A0B4XHN0	Peptidoglycan-associated protein	192	391936	Gammaproteobacteria	Alcanivorax pacificus W11-5	PF00691	IPR006664|IPR006665|IPR014169
A0A0B4XL92	Outer membrane protein OprF	387	391936	Gammaproteobacteria	Alcanivorax pacificus W11-5	PF00691|PF02412|PF13505	IPR006664|IPR006665|IPR027385
A0A0B4XMQ3	OmpA family protein	368	391936	Gammaproteobacteria	Alcanivorax pacificus W11-5	PF00691	IPR006664|IPR006665
A0A0B4XMU6	OmpA family protein	337	391936	Gammaproteobacteria	Alcanivorax pacificus W11-5	PF00691|PF13505	IPR006664|IPR006665|IPR027385
A0A0B4XN49	OmpA/MotB domain-containing protein	252	391936	Gammaproteobacteria	Alcanivorax pacificus W11-5	PF00691|PF14346	IPR006664|IPR006665|IPR025511
A0A0B4XPA1	OmpA family protein	209	391936	Gammaproteobacteria	Alcanivorax pacificus W11-5	PF00691|PF13488	IPR006664|IPR006665|IPR039567
A0A0B4XQ94	Uncharacterized protein	358	391936	Gammaproteobacteria	Alcanivorax pacificus W11-5	PF00691|PF01389	IPR000498|IPR006665
A0A0B4XQG5	Secreted protein containing outer membrane protein| OmpA/MotB| C-terminal domain	358	391936	Gammaproteobacteria	Alcanivorax pacificus W11-5	PF00691|PF13505	IPR006664|IPR006665|IPR027385
A0A0B4XR12	OmpA/MotB domain-containing protein	255	391936	Gammaproteobacteria	Alcanivorax pacificus W11-5	PF00691	IPR006664|IPR006665
A0A0B4XSP9	Flagellar motor protein MotB	297	391936	Gammaproteobacteria	Alcanivorax pacificus W11-5	PF00691|PF13677	IPR006665|IPR025713
A0A0B5B7L5	Membrane protein	464	345632	Deltaproteobacteria	Geobacter pickeringii	PF00691|PF13505	IPR006664|IPR006665|IPR027385
A0A0B5BB79	Chemotaxis protein MotB	289	345632	Deltaproteobacteria	Geobacter pickeringii	PF00691	IPR006665
A0A0B5BBM3	Peptidoglycan-associated protein	198	345632	Deltaproteobacteria	Geobacter pickeringii	PF00691	IPR006664|IPR006665|IPR014169
A0A0B5BBP3	Flagellar basal body stator protein MotB	264	345632	Deltaproteobacteria	Geobacter pickeringii	PF00691|PF13677	IPR006665|IPR025713
A0A0B5BDW1	Membrane protein	424	345632	Deltaproteobacteria	Geobacter pickeringii	PF00691|PF02412|PF13505	IPR006664|IPR006665|IPR027385|IPR030820
A0A0B5BE33	Peptidoglycan-associated protein	194	345632	Deltaproteobacteria	Geobacter pickeringii	PF00691	IPR006664|IPR006665|IPR014169
A0A0B5BEG1	Membrane protein	216	345632	Deltaproteobacteria	Geobacter pickeringii	PF00691|PF13488	IPR006664|IPR006665|IPR039567
A0A0B5BH54	Membrane protein	522	345632	Deltaproteobacteria	Geobacter pickeringii	PF00691	IPR006664|IPR006665
A0A0B5CK04	Membrane protein	250	546263	Betaproteobacteria	Neisseria elongata subsp. glycolytica ATCC 29315	PF00691	IPR006664|IPR006665
A0A0B5CPH1	Membrane protein	226	546263	Betaproteobacteria	Neisseria elongata subsp. glycolytica ATCC 29315	PF00691|PF05433	IPR006664|IPR006665|IPR008816
A0A0B5DNQ3	Chemotaxis MotB protein	281	1208324	Alphaproteobacteria	Celeribacter indicus	PF00691|PF13677	IPR006665|IPR025713
A0A0B5DPD3	OmpA/MotB domain-containing protein	665	1208324	Alphaproteobacteria	Celeribacter indicus	PF00691	IPR006665
A0A0B5DR87	OmpA-like protein	190	1208324	Alphaproteobacteria	Celeribacter indicus	PF00691	IPR006665
A0A0B5DSA7	Outer membrane protein OmpA-like protein	212	1208324	Alphaproteobacteria	Celeribacter indicus	PF00691	IPR006664|IPR006665
A0A0B5DUS4	OmpA/MotB protein	521	1208324	Alphaproteobacteria	Celeribacter indicus	PF00691|PF12849	IPR006665|IPR024370
A0A0B5DXJ3	OmpA/MotB domain-containing protein	216	1208324	Alphaproteobacteria	Celeribacter indicus	PF00691|PF13488	IPR006664|IPR006665|IPR039567
A0A0B5DYI7	OmpA/MotB domain-containing protein	306	1208324	Alphaproteobacteria	Celeribacter indicus	PF00691	IPR006664|IPR006665
A0A0B5DYW5	Peptidoglycan-associated protein	180	1208324	Alphaproteobacteria	Celeribacter indicus	PF00691	IPR006664|IPR006665|IPR014169
A0A0B5E142	OmpA-like protein	637	1208324	Alphaproteobacteria	Celeribacter indicus	PF00691	IPR006664|IPR006665
A0A0B5E4U2	Uncharacterized protein	540	1208324	Alphaproteobacteria	Celeribacter indicus	PF00691	IPR006665
A0A0B5E7Z3	OmpA/MotB domain-containing protein	93	1208324	Alphaproteobacteria	Celeribacter indicus	PF00691	IPR006665
A0A0B5FFR7	Uncharacterized protein	298	483547	Deltaproteobacteria	Geoalkalibacter subterraneus	PF00691	IPR006665
A0A0B5FGY4	Uncharacterized protein	832	483547	Deltaproteobacteria	Geoalkalibacter subterraneus	PF00092|PF00691	IPR002035|IPR006664|IPR006665
A0A0B5FH13	Uncharacterized protein	159	483547	Deltaproteobacteria	Geoalkalibacter subterraneus	PF00691	IPR006665
A0A0B5FLU5	Membrane protein	216	483547	Deltaproteobacteria	Geoalkalibacter subterraneus	PF00691|PF13488	IPR006664|IPR006665|IPR039567
A0A0B5FNV8	Peptidoglycan-associated protein	192	483547	Deltaproteobacteria	Geoalkalibacter subterraneus	PF00691	IPR006664|IPR006665|IPR014169
A0A0B5FSG5	Flagellar motor protein MotB	254	483547	Deltaproteobacteria	Geoalkalibacter subterraneus	PF00691|PF13677	IPR006665|IPR025713
A0A0B5FUP7	Uncharacterized protein	497	483547	Deltaproteobacteria	Geoalkalibacter subterraneus	PF00691	IPR006664|IPR006665
A0A0B5FUW7	Uncharacterized protein	500	483547	Deltaproteobacteria	Geoalkalibacter subterraneus	PF00691|PF13557	IPR006664|IPR006665
A0A0B5FWB6	Uncharacterized protein	416	483547	Deltaproteobacteria	Geoalkalibacter subterraneus	PF00691|PF02412|PF13505	IPR006664|IPR006665|IPR027385
A0A0B7IZ94	OmpA/MotB	352	1581680	Betaproteobacteria	Candidatus Methylopumilus turicensis	PF00691|PF13505	IPR006664|IPR006665|IPR027385
A0A0B7J1Q3	Peptidoglycan-associated lipoprotein	183	1581680	Betaproteobacteria	Candidatus Methylopumilus turicensis	PF00691	IPR006664|IPR006665
A0A0B8NYL4	Outer membrane protein sypB	86	1481914	Gammaproteobacteria	Vibrio ishigakensis	PF00691	IPR006664|IPR006665
A0A0B8P4S1	Outer membrane protein A	212	1481914	Gammaproteobacteria	Vibrio ishigakensis	PF00691	IPR006664|IPR006665
A0A0B8P7G7	T1SS peptidoglycan-associated lipoprotein lapL	185	1481914	Gammaproteobacteria	Vibrio ishigakensis	PF00691	IPR006664|IPR006665
A0A0B8PEX4	Peptidoglycan-associated protein	182	1481914	Gammaproteobacteria	Vibrio ishigakensis	PF00691	IPR006664|IPR006665|IPR014169
A0A0B8Z9L1	Peptidoglycan-associated protein	174	48936	Alphaproteobacteria	Novosphingobium subterraneum	PF00691	IPR006664|IPR006665|IPR014169
A0A0B8ZB10	OmpA/MotB	230	48936	Alphaproteobacteria	Novosphingobium subterraneum	PF00691|PF13488	IPR006664|IPR006665|IPR039567
A0A0B9A144	Chemotaxis protein MotB	279	48936	Alphaproteobacteria	Novosphingobium subterraneum	PF00691|PF13677	IPR006665|IPR025713
A0A0B9A2G0	OmpA/MotB domain-containing protein	291	48936	Alphaproteobacteria	Novosphingobium subterraneum	PF00691	IPR006664|IPR006665
A0A0B9ABQ0	OmpA/MotB	109	48936	Alphaproteobacteria	Novosphingobium subterraneum	PF00691	IPR006664|IPR006665
A0A0B9AFY1	Peptidoglycan-associated protein	170	48936	Alphaproteobacteria	Novosphingobium subterraneum	PF00691	IPR006664|IPR006665|IPR014169
A0A0C1Y1Q7	Peptidoglycan-associated protein	174	709839	Betaproteobacteria	Noviherbaspirillum autotrophicum	PF00691	IPR006664|IPR006665|IPR014169
A0A0C1Y7Q2	Membrane protein	215	709839	Betaproteobacteria	Noviherbaspirillum autotrophicum	PF00691	IPR006664|IPR006665
A0A0C1YG80	OmpA/MotB domain protein	264	870478	Betaproteobacteria	Burkholderia sp. MR1	PF00691	IPR006664|IPR006665
A0A0C1YNB6	Peptidoglycan-associated protein	171	709839	Betaproteobacteria	Noviherbaspirillum autotrophicum	PF00691	IPR006664|IPR006665|IPR014169
A0A0C1YNJ0	Flagellar motor protein MotD	257	709839	Betaproteobacteria	Noviherbaspirillum autotrophicum	PF00691|PF13677	IPR006665|IPR025713
A0A0C1YQN5	Uncharacterized protein	224	709839	Betaproteobacteria	Noviherbaspirillum autotrophicum	PF00691	IPR006664|IPR006665
A0A0C1YQP5	Peptidoglycan-associated protein	168	870478	Betaproteobacteria	Burkholderia sp. MR1	PF00691	IPR006664|IPR006665|IPR014169
A0A0C1YWR0	Type IV / VI secretion system protein| DotU family	440	870478	Betaproteobacteria	Burkholderia sp. MR1	PF00691|PF09850	IPR006665|IPR017732|IPR017733
A0A0C1Z0H2	Cytochrome c oxidase subunit 2	539	870478	Betaproteobacteria	Burkholderia sp. MR1	PF00116|PF00691|PF02790|PF13442	IPR002429|IPR006664|IPR006665|IPR009056|IPR011759|IPR014222
A0A0C1Z2X8	OmpA/MotB domain protein	174	870478	Betaproteobacteria	Burkholderia sp. MR1	PF00691	IPR006664|IPR006665
A0A0C1Z9N0	Flagellar motor rotation protein MotB	245	215803	Deltaproteobacteria	Enhygromyxa salina	PF00691	IPR006665
A0A0C1Z9P1	Putative internalin	502	215803	Deltaproteobacteria	Enhygromyxa salina	PF00691	IPR006664|IPR006665
A0A0C1ZIA3	OmpA/MotB domain protein	221	870478	Betaproteobacteria	Burkholderia sp. MR1	PF00691	IPR006664|IPR006665
A0A0C1ZIH7	Uncharacterized protein	619	215803	Deltaproteobacteria	Enhygromyxa salina	PF00691	IPR006664|IPR006665
A0A0C1ZL24	OmpA domain protein	239	215803	Deltaproteobacteria	Enhygromyxa salina	PF00691	IPR006664|IPR006665
A0A0C1ZL91	OmpA/MotB domain protein	576	870478	Betaproteobacteria	Burkholderia sp. MR1	PF00691	IPR006664|IPR006665
A0A0C1ZLN1	Flagellar motor rotation protein MotB	297	215803	Deltaproteobacteria	Enhygromyxa salina	PF00691	IPR006665
A0A0C1ZLZ9	Flagellar motor rotation protein MotB	256	215803	Deltaproteobacteria	Enhygromyxa salina	PF00691	IPR006665
A0A0C1ZW52	Flagellar motor rotation protein MotB	266	215803	Deltaproteobacteria	Enhygromyxa salina	PF00691	IPR006664|IPR006665
A0A0C1ZW97	Calcium-binding acidic-repeat protein	494	215803	Deltaproteobacteria	Enhygromyxa salina	PF00691	IPR006664|IPR006665
A0A0C1ZWF7	Outer membrane lipoprotein omp16	186	215803	Deltaproteobacteria	Enhygromyxa salina	PF00691	IPR006664|IPR006665
A0A0C1ZXN1	Outer membrane protein	399	215803	Deltaproteobacteria	Enhygromyxa salina	PF00691	IPR006664|IPR006665
A0A0C1ZXS5	Putative internalin	425	215803	Deltaproteobacteria	Enhygromyxa salina	PF00691	IPR006664|IPR006665
A0A0C2A020	18K peptidoglycan-associated outer membrane lipoprotein	261	215803	Deltaproteobacteria	Enhygromyxa salina	PF00691	IPR006664|IPR006665
A0A0C2BLP6	Flagellar motor protein MotB	314	709839	Betaproteobacteria	Noviherbaspirillum autotrophicum	PF00691|PF13677	IPR006665|IPR025713
A0A0C2BNA6	Peptidoglycan-associated protein	173	709839	Betaproteobacteria	Noviherbaspirillum autotrophicum	PF00691	IPR006664|IPR006665|IPR014169
A0A0C2BQ43	Uncharacterized protein	212	709839	Betaproteobacteria	Noviherbaspirillum autotrophicum	PF00691	IPR006665
A0A0C2BUA6	Uncharacterized protein	230	709839	Betaproteobacteria	Noviherbaspirillum autotrophicum	PF00691	IPR006665
A0A0C2C235	Type IV / VI secretion system protein| DotU family	445	870478	Betaproteobacteria	Burkholderia sp. MR1	PF00691|PF09850	IPR006665|IPR017732|IPR017733
A0A0C2C6J4	OmpA/MotB domain protein	611	870478	Betaproteobacteria	Burkholderia sp. MR1	PF00691	IPR006665
A0A0C2C6Y2	Motility protein B| N-terminal domain containing protein	327	870478	Betaproteobacteria	Burkholderia sp. MR1	PF00691|PF13677	IPR006665|IPR025713
A0A0C2C8F8	OmpA/MotB domain protein	218	870478	Betaproteobacteria	Burkholderia sp. MR1	PF00691|PF13441	IPR006664|IPR006665|IPR027367
A0A0C2C9P5	Motility protein B| N-terminal domain containing protein	320	870478	Betaproteobacteria	Burkholderia sp. MR1	PF00691|PF13677	IPR006665|IPR025713
A0A0C2CBC9	OmpA/MotB domain protein	215	870478	Betaproteobacteria	Burkholderia sp. MR1	PF00691	IPR006665
A0A0C2CCS5	OmpA/MotB domain protein	166	870478	Betaproteobacteria	Burkholderia sp. MR1	PF00691	IPR006664|IPR006665
A0A0C2CF92	OmpA/MotB domain protein	451	870478	Betaproteobacteria	Burkholderia sp. MR1	PF00691	IPR006664|IPR006665
A0A0C2CP81	OmpA/MotB	236	215803	Deltaproteobacteria	Enhygromyxa salina	PF00691	IPR006664|IPR006665
A0A0C2CTY3	Uncharacterized protein	378	215803	Deltaproteobacteria	Enhygromyxa salina	PF00691	IPR006664|IPR006665
A0A0C2CUV3	Uncharacterized protein	154	215803	Deltaproteobacteria	Enhygromyxa salina	PF00691	IPR006665
A0A0C2CZQ3	OmpA domain protein	787	215803	Deltaproteobacteria	Enhygromyxa salina	PF00691	IPR006665
A0A0C2D050	Putative outer membrane lipoprotein	200	215803	Deltaproteobacteria	Enhygromyxa salina	PF00691	IPR006664|IPR006665
A0A0C2D309	18K peptidoglycan-associated outer membrane lipoprotein	253	215803	Deltaproteobacteria	Enhygromyxa salina	PF00691	IPR006664|IPR006665
A0A0C2D5N0	Flagellar motor rotation protein MotB	205	215803	Deltaproteobacteria	Enhygromyxa salina	PF00691	IPR006664|IPR006665
A0A0C2D6D6	18K peptidoglycan-associated outer membrane lipoprotein	209	215803	Deltaproteobacteria	Enhygromyxa salina	PF00691	IPR006664|IPR006665
A0A0C2D7E3	OmpA family protein	468	215803	Deltaproteobacteria	Enhygromyxa salina	PF00691	IPR006665
A0A0C2DC12	Outer membrane lipoprotein omp16	510	215803	Deltaproteobacteria	Enhygromyxa salina	PF00691|PF02412	IPR006664|IPR006665
A0A0C2DRK2	Membrane protein	216	1121915	Deltaproteobacteria	Geoalkalibacter ferrihydriticus DSM 17813	PF00691|PF13488	IPR006664|IPR006665|IPR039567
A0A0C2DVI2	Uncharacterized protein	157	1121915	Deltaproteobacteria	Geoalkalibacter ferrihydriticus DSM 17813	PF00691	IPR006665
A0A0C2DWA3	Uncharacterized protein	308	1121915	Deltaproteobacteria	Geoalkalibacter ferrihydriticus DSM 17813	PF00691|PF14346	IPR006664|IPR006665|IPR025511
A0A0C2HKG7	Flagellar motor protein MotB	255	1121915	Deltaproteobacteria	Geoalkalibacter ferrihydriticus DSM 17813	PF00691|PF13677	IPR006665|IPR025713
A0A0C2HRF7	Uncharacterized protein	498	1121915	Deltaproteobacteria	Geoalkalibacter ferrihydriticus DSM 17813	PF00691|PF13557	IPR006664|IPR006665
A0A0C2HS68	Uncharacterized protein	495	1121915	Deltaproteobacteria	Geoalkalibacter ferrihydriticus DSM 17813	PF00691|PF14346	IPR006664|IPR006665|IPR025511
A0A0C2HUF4	Uncharacterized protein	371	1121915	Deltaproteobacteria	Geoalkalibacter ferrihydriticus DSM 17813	PF00691|PF13519	IPR002035|IPR006664|IPR006665
A0A0C2HY43	Peptidoglycan-associated protein	189	1121915	Deltaproteobacteria	Geoalkalibacter ferrihydriticus DSM 17813	PF00691	IPR006664|IPR006665|IPR014169
A0A0C2VBU5	Uncharacterized protein	250	1539065	Epsilonproteobacteria	Sulfurovum sp. FS08-3	PF00691	IPR006665
A0A0C2VBV3	Uncharacterized protein	161	1539065	Epsilonproteobacteria	Sulfurovum sp. FS08-3	PF00691	IPR006665
A0A0C2VKT0	Membrane protein	244	1539064	Epsilonproteobacteria	Sulfurovum sp. FS06-10	PF00691|PF13488	IPR006664|IPR006665|IPR039567
A0A0C2VPS6	Uncharacterized protein	376	1539065	Epsilonproteobacteria	Sulfurovum sp. FS08-3	PF00691	IPR006665
A0A0C2YSF0	Uncharacterized protein	230	1539064	Epsilonproteobacteria	Sulfurovum sp. FS06-10	PF00691	IPR006665
A0A0C2Z5R1	Uncharacterized protein	186	1539064	Epsilonproteobacteria	Sulfurovum sp. FS06-10	PF00691	IPR006664|IPR006665
A0A0C2ZJA0	Uncharacterized protein	350	1539064	Epsilonproteobacteria	Sulfurovum sp. FS06-10	PF00691	IPR006665
A0A0C2ZM88	Uncharacterized protein	243	1539064	Epsilonproteobacteria	Sulfurovum sp. FS06-10	PF00691	IPR006664|IPR006665
A0A0C2ZNB6	Uncharacterized protein	181	1539064	Epsilonproteobacteria	Sulfurovum sp. FS06-10	PF00691	IPR006664|IPR006665
A0A0C4WHV5	ABC-type phosphate transport system| periplasmic component	459	1328314	Gammaproteobacteria	Azotobacter chroococcum NCIMB 8003	PF00691|PF12849	IPR006665|IPR024370
A0A0C4WKP1	Peptidoglycan-associated protein	180	1328314	Gammaproteobacteria	Azotobacter chroococcum NCIMB 8003	PF00691	IPR006664|IPR006665|IPR014169
A0A0C4WMV1	Major porin and structural outer membrane porin OprF	351	1328314	Gammaproteobacteria	Azotobacter chroococcum NCIMB 8003	PF00691|PF05736	IPR006664|IPR006665|IPR008722
A0A0C4WNN3	Outer membrane protein| OmpA/MotB family	270	1328314	Gammaproteobacteria	Azotobacter chroococcum NCIMB 8003	PF00691|PF14346	IPR006664|IPR006665|IPR025511
A0A0C4WQ77	OmpA family protein	236	1328314	Gammaproteobacteria	Azotobacter chroococcum NCIMB 8003	PF00691|PF13488	IPR006664|IPR006665|IPR039567
A0A0C4WRU4	Outer membrane protein| OmpA/MotB family	214	1328314	Gammaproteobacteria	Azotobacter chroococcum NCIMB 8003	PF00691	IPR006665
A0A0C4Y5L2	Outer membrane protein ImpK/VasF| OmpA/MotB domain	395	68895	Betaproteobacteria	Cupriavidus basilensis	PF00691|PF09850	IPR006665|IPR017732|IPR017733
A0A0C4Y7Z9	Outer membrane protein A	219	68895	Betaproteobacteria	Cupriavidus basilensis	PF00691	IPR006664|IPR006665
A0A0C4YB46	Outer membrane protein ImpK/VasF| OmpA/MotB domain	206	68895	Betaproteobacteria	Cupriavidus basilensis	PF00691	IPR006665
A0A0C4YCG5	Peptidoglycan-associated protein	171	68895	Betaproteobacteria	Cupriavidus basilensis	PF00691	IPR006664|IPR006665|IPR014169
A0A0C4YFG3	Outer membrane protein ImpK/VasF| OmpA/MotB domain	418	68895	Betaproteobacteria	Cupriavidus basilensis	PF00691|PF09850	IPR006665|IPR017732|IPR017733
A0A0C4YFY1	Flagellar motor rotation protein MotB	340	68895	Betaproteobacteria	Cupriavidus basilensis	PF00691|PF13677	IPR006665|IPR025713
A0A0C4YGE8	Outer membrane lipoprotein omp16	168	68895	Betaproteobacteria	Cupriavidus basilensis	PF00691	IPR006664|IPR006665
A0A0C4YGM0	Flagellar motor rotation protein MotB	571	68895	Betaproteobacteria	Cupriavidus basilensis	PF00691	IPR006664|IPR006665
A0A0C4YHZ7	Flagellar motor protein	215	68895	Betaproteobacteria	Cupriavidus basilensis	PF00691	IPR006665
A0A0C4YIY1	Outer membrane lipoprotein omp16	210	68895	Betaproteobacteria	Cupriavidus basilensis	PF00691|PF13441	IPR006664|IPR006665|IPR027367
A0A0C5J8B7	Flagellar motor protein MotB	236	1565605	Betaproteobacteria	Rugosibacter aromaticivorans	PF00691|PF13677	IPR006664|IPR006665|IPR025713
A0A0C5JBJ6	Uncharacterized protein	222	1565605	Betaproteobacteria	Rugosibacter aromaticivorans	PF00691	IPR006664|IPR006665
A0A0C5JJX0	Peptidoglycan-associated protein	179	1565605	Betaproteobacteria	Rugosibacter aromaticivorans	PF00691	IPR006664|IPR006665
A0A0C5JMB2	Membrane protein	223	1565605	Betaproteobacteria	Rugosibacter aromaticivorans	PF00691	IPR006664|IPR006665
A0A0C5L504	Flagellar motor protein MotB	283	1609977	Alphaproteobacteria	Sphingomonas hengshuiensis	PF00691|PF13677	IPR006665|IPR025713
A0A0C5L9L0	Membrane protein	221	1609977	Alphaproteobacteria	Sphingomonas hengshuiensis	PF00691|PF13488	IPR006664|IPR006665|IPR039567
A0A0C5LB55	Peptidoglycan-associated protein	171	1609977	Alphaproteobacteria	Sphingomonas hengshuiensis	PF00691	IPR006664|IPR006665|IPR014169
A0A0C5LIM7	Flagellar motor protein MotB	378	1609977	Alphaproteobacteria	Sphingomonas hengshuiensis	PF00691|PF13505	IPR006664|IPR006665|IPR027385
A0A0C5V1I9	Outer membrane protein and related peptidoglycan-associated (Lipo)protein	619	1445510	Gammaproteobacteria	Gynuella sunshinyii YC6258	PF00691|PF13505|PF17803	IPR006664|IPR006665|IPR027385|IPR040853
A0A0C5V1S9	Outer membrane protein and related peptidoglycan-associated (Lipo)protein	472	1445510	Gammaproteobacteria	Gynuella sunshinyii YC6258	PF00691|PF02412|PF13505	IPR006664|IPR006665|IPR027385
A0A0C5VBW1	Flagellar motor protein	294	1445510	Gammaproteobacteria	Gynuella sunshinyii YC6258	PF00691|PF13677	IPR006665|IPR025713
A0A0C5VEV1	Outer membrane protein and related peptidoglycan-associated (Lipo)protein	593	1445510	Gammaproteobacteria	Gynuella sunshinyii YC6258	PF00691	IPR006665
A0A0C5VGE6	Outer membrane protein and related peptidoglycan-associated (Lipo)protein	220	1445510	Gammaproteobacteria	Gynuella sunshinyii YC6258	PF00691|PF13488	IPR006664|IPR006665|IPR039567
A0A0C5VIS8	Outer membrane protein and related peptidoglycan-associated (Lipo)protein	237	1445510	Gammaproteobacteria	Gynuella sunshinyii YC6258	PF00691	IPR006665
A0A0C5VK20	Peptidoglycan-associated protein	186	1445510	Gammaproteobacteria	Gynuella sunshinyii YC6258	PF00691	IPR006664|IPR006665|IPR014169
A0A0C5VKE7	Flagellar motor protein	264	1445510	Gammaproteobacteria	Gynuella sunshinyii YC6258	PF00691|PF13677	IPR006665|IPR025713
A0A0C5VMM7	Outer membrane protein and related peptidoglycan-associated (Lipo)protein	302	1445510	Gammaproteobacteria	Gynuella sunshinyii YC6258	PF00691|PF18393	IPR006664|IPR006665|IPR041544
A0A0C5VR49	ABC-type phosphate transport system| periplasmic component	424	1445510	Gammaproteobacteria	Gynuella sunshinyii YC6258	PF00691|PF12849	IPR006665|IPR024370
A0A0C5VRY3	Flagellar motor protein	379	1445510	Gammaproteobacteria	Gynuella sunshinyii YC6258	PF00691	IPR006665
A0A0C5VTB7	Outer membrane protein and related peptidoglycan-associated (Lipo)protein	944	1445510	Gammaproteobacteria	Gynuella sunshinyii YC6258	PF00691	IPR006665
A0A0D1MMI7	Membrane protein	308	29448	Alphaproteobacteria	Bradyrhizobium elkanii	PF00691	IPR006665
A0A0D1NIY1	Membrane protein	210	29448	Alphaproteobacteria	Bradyrhizobium elkanii	PF00691	IPR006664|IPR006665
A0A0D1NLA9	Membrane protein	276	29448	Alphaproteobacteria	Bradyrhizobium elkanii	PF00691|PF13677	IPR006665|IPR025713
A0A0D1NUL4	Uncharacterized protein	580	29448	Alphaproteobacteria	Bradyrhizobium elkanii	PF00691	IPR006665
A0A0D1NVF7	Membrane protein	226	29448	Alphaproteobacteria	Bradyrhizobium elkanii	PF00691	IPR006664|IPR006665
A0A0D1P3Z5	Membrane protein	464	29448	Alphaproteobacteria	Bradyrhizobium elkanii	PF00691	IPR006664|IPR006665
A0A0D1P4A6	Uncharacterized protein	342	29448	Alphaproteobacteria	Bradyrhizobium elkanii	PF00691	IPR006665
A0A0D1PC16	Membrane protein	217	29448	Alphaproteobacteria	Bradyrhizobium elkanii	PF00691	IPR006664|IPR006665
A0A0D1PC90	Peptidoglycan-associated protein	160	29448	Alphaproteobacteria	Bradyrhizobium elkanii	PF00691	IPR006664|IPR006665|IPR014169
A0A0D2GJV9	Uncharacterized protein	152	1429043	Deltaproteobacteria	Dethiosulfatarculus sandiegensis	PF00691	IPR006664|IPR006665
A0A0D2HKK6	Flagellar motor protein MotB	189	1429043	Deltaproteobacteria	Dethiosulfatarculus sandiegensis	PF00691	IPR006664|IPR006665
A0A0D2HW74	Uncharacterized protein	354	1429043	Deltaproteobacteria	Dethiosulfatarculus sandiegensis	PF00691|PF13677	IPR006665|IPR025713
A0A0D2J603	Uncharacterized protein	259	1429043	Deltaproteobacteria	Dethiosulfatarculus sandiegensis	PF00691|PF13677	IPR006665|IPR025713
A0A0D2J6P0	Uncharacterized protein	237	1429043	Deltaproteobacteria	Dethiosulfatarculus sandiegensis	PF00691|PF13677	IPR006665|IPR025713
A0A0D2JNM3	Cell envelope biogenesis protein OmpA	313	1429043	Deltaproteobacteria	Dethiosulfatarculus sandiegensis	PF00691	IPR006664|IPR006665|IPR013026
A0A0D2JNW4	Flagellar motor protein MotB	250	1429043	Deltaproteobacteria	Dethiosulfatarculus sandiegensis	PF00691|PF13677	IPR006665|IPR025713
A0A0D2JVD8	Uncharacterized protein	243	1429043	Deltaproteobacteria	Dethiosulfatarculus sandiegensis	PF00691|PF13677	IPR006665|IPR025713
A0A0D2JYG9	Peptidoglycan-associated protein	180	1429043	Deltaproteobacteria	Dethiosulfatarculus sandiegensis	PF00691	IPR006664|IPR006665|IPR014169
A0A0D5L449	SmpA / OmlA family protein	276	1468409	Betaproteobacteria	Burkholderia sp. 2002721687	PF00691|PF04355	IPR006664|IPR006665|IPR007450
A0A0D5L7Q8	Type IV/VI secretion system| DotU family domain protein	560	1468409	Betaproteobacteria	Burkholderia sp. 2002721687	PF00691|PF09850	IPR006665|IPR017732
A0A0D5L8A1	OmpA family protein	215	1468409	Betaproteobacteria	Burkholderia sp. 2002721687	PF00691	IPR006665
A0A0D5L8N3	Type VI secretion system peptidoglycan-associated domain protein	437	1468409	Betaproteobacteria	Burkholderia sp. 2002721687	PF00691|PF09850	IPR006665|IPR017732|IPR017733
A0A0D5L9C3	Type VI secretion system peptidoglycan-associated domain protein	436	1468409	Betaproteobacteria	Burkholderia sp. 2002721687	PF00691|PF09850	IPR006665|IPR017732|IPR017733
A0A0D5LAK7	Membrane MotB of proton-channel complex MotA/MotB family protein	340	1468409	Betaproteobacteria	Burkholderia sp. 2002721687	PF00691|PF13677	IPR006665|IPR025713
A0A0D5LB22	OmpA family protein	313	1468409	Betaproteobacteria	Burkholderia sp. 2002721687	PF00691	IPR006664|IPR006665
A0A0D5LDS8	Cytochrome c oxidase subunit 2	517	1468409	Betaproteobacteria	Burkholderia sp. 2002721687	PF00116|PF00691|PF02790|PF13442	IPR002429|IPR006664|IPR006665|IPR009056|IPR011759|IPR014222
A0A0D5LES8	Peptidoglycan-associated protein	169	1468409	Betaproteobacteria	Burkholderia sp. 2002721687	PF00691	IPR006664|IPR006665|IPR014169
A0A0D5LF34	OmpA family protein	224	1468409	Betaproteobacteria	Burkholderia sp. 2002721687	PF00691	IPR006664|IPR006665
A0A0D5LFX6	Glycine-zipper containing OmpA-like membrane domain protein	215	1468409	Betaproteobacteria	Burkholderia sp. 2002721687	PF00691|PF13441	IPR006664|IPR006665|IPR027367
A0A0D5LRH6	Uncharacterized protein	343	1486262	Alphaproteobacteria	Martelella endophytica	PF00691	IPR006665
A0A0D5LTT8	Peptidoglycan-associated protein	181	1486262	Alphaproteobacteria	Martelella endophytica	PF00691	IPR006664|IPR006665|IPR014169
A0A0D5LVQ9	Membrane protein	216	1486262	Alphaproteobacteria	Martelella endophytica	PF00691|PF13488	IPR006664|IPR006665|IPR039567
A0A0D6AYQ4	Uncharacterized protein	554	35806	Alphaproteobacteria	Rhodovulum sulfidophilum	PF00691	IPR006665
A0A0D6B0H6	OmpA domain protein	678	35806	Alphaproteobacteria	Rhodovulum sulfidophilum	PF00691	IPR006664|IPR006665
A0A0D6B1F5	OmpA family protein	216	35806	Alphaproteobacteria	Rhodovulum sulfidophilum	PF00691	IPR006664|IPR006665
A0A0D6B536	Peptidoglycan-associated protein	167	35806	Alphaproteobacteria	Rhodovulum sulfidophilum	PF00691	IPR006664|IPR006665|IPR014169
A0A0D6B736	OmpA/MotB protein	221	35806	Alphaproteobacteria	Rhodovulum sulfidophilum	PF00691|PF13488	IPR006664|IPR006665|IPR039567
A0A0D6B7B3	OmpA/MotB domain protein	327	35806	Alphaproteobacteria	Rhodovulum sulfidophilum	PF00691	IPR006664|IPR006665
A0A0D6B9S7	OmpA/MotB domain protein	513	35806	Alphaproteobacteria	Rhodovulum sulfidophilum	PF00691|PF09850	IPR006665|IPR017732
A0A0D6EWM8	Peptidoglycan-associated lipoprotein	166	1581557	Betaproteobacteria	Candidatus Methylopumilus planktonicus	PF00691	IPR006664|IPR006665
A0A0D6J9R1	Uncharacterized protein	342	1608628	Alphaproteobacteria	Candidatus Filomicrobium marinum	PF00691	IPR006665
A0A0D6J9U2	Uncharacterized protein	286	1608628	Alphaproteobacteria	Candidatus Filomicrobium marinum	PF00691	IPR006665
A0A0D6JBY3	Uncharacterized protein	654	1608628	Alphaproteobacteria	Candidatus Filomicrobium marinum	PF00691	IPR006664|IPR006665
A0A0D6JCR1	Uncharacterized protein	536	1608628	Alphaproteobacteria	Candidatus Filomicrobium marinum	PF00691	IPR006664|IPR006665
A0A0D6JGY6	Uncharacterized protein	411	1608628	Alphaproteobacteria	Candidatus Filomicrobium marinum	PF00691	IPR006664|IPR006665
A0A0D6JH92	Outer membrane protein/peptidoglycan-associated (Lipo)protein (Modular protein)	527	1608628	Alphaproteobacteria	Candidatus Filomicrobium marinum	PF00691	IPR006665
A0A0D6JHJ1	Putative OmpA/MotB domain protein	841	1608628	Alphaproteobacteria	Candidatus Filomicrobium marinum	PF00691	IPR006664|IPR006665
A0A0D6JJN7	Putative Flagellar motor protein MotB	406	1608628	Alphaproteobacteria	Candidatus Filomicrobium marinum	PF00691|PF13677	IPR006665|IPR025713
A0A0D6JJW1	Uncharacterized protein	593	1608628	Alphaproteobacteria	Candidatus Filomicrobium marinum	PF00691|PF12849	IPR006665|IPR024370
A0A0D6JKC3	Putative OmpA/MotB domain protein	531	1608628	Alphaproteobacteria	Candidatus Filomicrobium marinum	PF00691|PF12849	IPR006665|IPR024370
A0A0D6MIW3	Uncharacterized protein	133	1231623	Alphaproteobacteria	Tanticharoenia sakaeratensis NBRC 103193	PF00691	IPR006665
A0A0D6MLV5	Outer membrane protein	367	1231623	Alphaproteobacteria	Tanticharoenia sakaeratensis NBRC 103193	PF00691	IPR006665
A0A0D6MPN3	Peptidoglycan-associated protein	162	1231623	Alphaproteobacteria	Tanticharoenia sakaeratensis NBRC 103193	PF00691	IPR006664|IPR006665|IPR014169
A0A0D6MQ03	Outer membrane protein	380	1231623	Alphaproteobacteria	Tanticharoenia sakaeratensis NBRC 103193	PF00691	IPR006665
A0A0D6MQ15	Uncharacterized protein	331	1231623	Alphaproteobacteria	Tanticharoenia sakaeratensis NBRC 103193	PF00691	IPR006665
A0A0D6MT61	Chemotaxis protein MotB	412	887700	Alphaproteobacteria	Acetobacter aceti NBRC 14818	PF00691|PF13677	IPR006665|IPR025713
A0A0D6MTL1	Peptidoglycan-associated protein	159	887700	Alphaproteobacteria	Acetobacter aceti NBRC 14818	PF00691	IPR006664|IPR006665|IPR014169
A0A0D6MU62	Outer membrane protein OmpA	375	887700	Alphaproteobacteria	Acetobacter aceti NBRC 14818	PF00691	IPR006665
A0A0D6MW48	Outer membrane protein OmpA	379	887700	Alphaproteobacteria	Acetobacter aceti NBRC 14818	PF00691|PF13505	IPR006665|IPR027385
A0A0D6MXK5	Uncharacterized protein	125	887700	Alphaproteobacteria	Acetobacter aceti NBRC 14818	PF00691	IPR006665
A0A0D6N9S2	Outer membrane protein OmpA	379	1231340	Alphaproteobacteria	Acetobacter indonesiensis 5H-1	PF00691	IPR006665
A0A0D6NB98	Outer membrane protein OmpA	382	1231340	Alphaproteobacteria	Acetobacter indonesiensis 5H-1	PF00691|PF13505	IPR006665|IPR027385
A0A0D6NBJ1	Outer membrane protein/flagellar motor protein OmpA/MotB	326	1231340	Alphaproteobacteria	Acetobacter indonesiensis 5H-1	PF00691	IPR006665
A0A0D6NE76	Uncharacterized protein	125	1231340	Alphaproteobacteria	Acetobacter indonesiensis 5H-1	PF00691	IPR006665
A0A0D6NF36	Peptidoglycan-associated protein	158	1231340	Alphaproteobacteria	Acetobacter indonesiensis 5H-1	PF00691	IPR006664|IPR006665|IPR014169
A0A0D6NHG6	Outer membrane protein OmpA	383	1231341	Alphaproteobacteria	Acetobacter orientalis 21F-2	PF00691	IPR006665
A0A0D6NHY5	Uncharacterized protein	125	1231341	Alphaproteobacteria	Acetobacter orientalis 21F-2	PF00691	IPR006665
A0A0D6NI21	Peptidoglycan-associated protein	158	1231341	Alphaproteobacteria	Acetobacter orientalis 21F-2	PF00691	IPR006664|IPR006665|IPR014169
A0A0D6NLZ8	Outer membrane protein/flagellar motor protein OmpA/MotB	323	1231341	Alphaproteobacteria	Acetobacter orientalis 21F-2	PF00691	IPR006665
A0A0D6P5C9	Uncharacterized protein	130	1231350	Alphaproteobacteria	Acidisphaera rubrifaciens HS-AP3	PF00691	IPR006665
A0A0D6P6K7	Outer membrane protein OmpA	373	1231350	Alphaproteobacteria	Acidisphaera rubrifaciens HS-AP3	PF00691	IPR006664|IPR006665
A0A0D6P7I4	Outer membrane protein OmpA	374	1231350	Alphaproteobacteria	Acidisphaera rubrifaciens HS-AP3	PF00691	IPR006664|IPR006665
A0A0D6P7P7	Peptidoglycan-associated protein	157	1231350	Alphaproteobacteria	Acidisphaera rubrifaciens HS-AP3	PF00691	IPR006664|IPR006665|IPR014169
A0A0D6RVT5	Peptidoglycan-associated protein	165	1604022	Gammaproteobacteria	Pseudomonas sp. FeS53a	PF00691	IPR006664|IPR006665|IPR014169
A0A0D6RZB7	Sodium-type flagellar protein motY	329	1604022	Gammaproteobacteria	Pseudomonas sp. FeS53a	PF00691|PF18393	IPR006665|IPR041544
A0A0D6RZD8	Outer membrane lipoprotein omp16	258	1604022	Gammaproteobacteria	Pseudomonas sp. FeS53a	PF00691|PF14346	IPR006664|IPR006665|IPR025511
A0A0D6RZH4	Outer membrane protein A	232	1604022	Gammaproteobacteria	Pseudomonas sp. FeS53a	PF00691	IPR006664|IPR006665
A0A0D6RZK4	OmpA family protein	254	1604022	Gammaproteobacteria	Pseudomonas sp. FeS53a	PF00691	IPR006665
A0A0D6RZM1	Outer membrane protein A	177	1604022	Gammaproteobacteria	Pseudomonas sp. FeS53a	PF00691|PF02412	IPR006664|IPR006665
A0A0D6S2E1	OmpA family protein	269	1604022	Gammaproteobacteria	Pseudomonas sp. FeS53a	PF00691|PF14346	IPR006664|IPR006665|IPR025511
A0A0D6S7B9	Outer membrane protein assembly factor YaeT	232	1604022	Gammaproteobacteria	Pseudomonas sp. FeS53a	PF00691|PF13488	IPR006664|IPR006665|IPR039567
A0A0D6SGT3	Flagellar motor rotation protein MotB	294	1604022	Gammaproteobacteria	Pseudomonas sp. FeS53a	PF00691|PF13677	IPR006665|IPR025713
A0A0D6SLJ3	Outer membrane protein ImpK/VasF| OmpA/MotB domain	449	1604022	Gammaproteobacteria	Pseudomonas sp. FeS53a	PF00691|PF09850	IPR006665|IPR017732|IPR017733
A0A0D6SMN6	Flagellar motor rotation protein MotB	343	1604022	Gammaproteobacteria	Pseudomonas sp. FeS53a	PF00691|PF13677	IPR006665|IPR025713
A0A0D6SSV0	Integral membrane protein YfiB	164	1604022	Gammaproteobacteria	Pseudomonas sp. FeS53a	PF00691	IPR006664|IPR006665
A0A0D6T020	Major porin and structural outer membrane porin OprF	317	1604022	Gammaproteobacteria	Pseudomonas sp. FeS53a	PF00691|PF05736	IPR006664|IPR006665|IPR008722
A0A0D6T119	Flagellar motor rotation protein MotB	353	1604022	Gammaproteobacteria	Pseudomonas sp. FeS53a	PF00691|PF13677	IPR006665|IPR025713
A0A0D6T3Y5	Phosphate ABC transporter| periplasmic phosphate-binding protein PstS	457	1604022	Gammaproteobacteria	Pseudomonas sp. FeS53a	PF00691|PF12849	IPR006665|IPR024370
A0A0D7E941	Membrane protein	283	1076	Alphaproteobacteria	Rhodopseudomonas palustris	PF00691|PF13677	IPR006665|IPR025713
A0A0D7E9R0	Membrane protein	332	1076	Alphaproteobacteria	Rhodopseudomonas palustris	PF00691	IPR006665
A0A0D7EI66	Membrane protein	211	1076	Alphaproteobacteria	Rhodopseudomonas palustris	PF00691	IPR006664|IPR006665
A0A0D7EJD1	Membrane protein	464	1076	Alphaproteobacteria	Rhodopseudomonas palustris	PF00691	IPR006664|IPR006665
A0A0D7ES68	Porin	429	1076	Alphaproteobacteria	Rhodopseudomonas palustris	PF00691	IPR006664|IPR006665
A0A0D7EV34	Uncharacterized protein	341	1076	Alphaproteobacteria	Rhodopseudomonas palustris	PF00691	IPR006665
A0A0D7EY30	Peptidoglycan-associated protein	167	1076	Alphaproteobacteria	Rhodopseudomonas palustris	PF00691	IPR006664|IPR006665|IPR014169
A0A0D7F0Q8	Membrane protein	274	1076	Alphaproteobacteria	Rhodopseudomonas palustris	PF00691|PF13677	IPR006665|IPR025713
A0A0D7F5D8	Flagellar motor protein MotB	209	1076	Alphaproteobacteria	Rhodopseudomonas palustris	PF00691	IPR006664|IPR006665
A0A0D7K8I7	Membrane protein	215	80878	Betaproteobacteria	Acidovorax temperans	PF00691	IPR006664|IPR006665
A0A0D7KA66	Membrane protein	211	80878	Betaproteobacteria	Acidovorax temperans	PF00691	IPR006665
A0A0D7KDZ7	Membrane protein	214	80878	Betaproteobacteria	Acidovorax temperans	PF00691|PF13488	IPR006664|IPR006665|IPR039567
A0A0D7KE05	Flagellar motor protein MotB	310	80878	Betaproteobacteria	Acidovorax temperans	PF00691|PF13677	IPR006665|IPR025713
A0A0D7KE60	Peptidoglycan-associated protein	179	80878	Betaproteobacteria	Acidovorax temperans	PF00691	IPR006664|IPR006665|IPR014169
A0A0D8CDU8	Chemotaxis protein MotB	241	1616823	Alphaproteobacteria	Thalassospira sp. HJ	PF00691|PF13677	IPR006665|IPR025713
A0A0D8CFG8	Cell envelope biogenesis protein OmpA	298	1616823	Alphaproteobacteria	Thalassospira sp. HJ	PF00691	IPR006664|IPR006665
A0A0D8CG24	Lysophospholipase	395	1616823	Alphaproteobacteria	Thalassospira sp. HJ	PF00691	IPR006665
A0A0D8CG48	Peptidoglycan-associated protein	164	1616823	Alphaproteobacteria	Thalassospira sp. HJ	PF00691	IPR006664|IPR006665|IPR014169
A0A0D8CGA8	Membrane protein	223	1616823	Alphaproteobacteria	Thalassospira sp. HJ	PF00691|PF13677	IPR006665|IPR025713
A0A0D8CHS1	Uncharacterized protein	387	1616823	Alphaproteobacteria	Thalassospira sp. HJ	PF00691	IPR006665
A0A0D8CI74	Flagellar motor protein MotB	437	1616823	Alphaproteobacteria	Thalassospira sp. HJ	PF00691	IPR006665
A0A0D8CIQ1	Cell envelope biogenesis protein OmpA	300	1616823	Alphaproteobacteria	Thalassospira sp. HJ	PF00691|PF13677	IPR006665|IPR025713
A0A0D8CJV7	Flagellar motor protein MotB	282	1616823	Alphaproteobacteria	Thalassospira sp. HJ	PF00691	IPR006664|IPR006665
A0A0D8CMV8	Membrane protein	318	1616823	Alphaproteobacteria	Thalassospira sp. HJ	PF00691|PF13677	IPR006665|IPR025713
A0A0D8CMY4	Flagellar motor protein MotB	315	485447	Gammaproteobacteria	Thalassomonas actiniarum	PF00691|PF13677	IPR006665|IPR025713
A0A0D8CPG7	Flagellar motor protein MotB	216	485447	Gammaproteobacteria	Thalassomonas actiniarum	PF00691	IPR006664|IPR006665
A0A0D8CQZ7	Uncharacterized protein	270	485447	Gammaproteobacteria	Thalassomonas actiniarum	PF00691	IPR006664|IPR006665
A0A0D8CS92	Uncharacterized protein	581	485447	Gammaproteobacteria	Thalassomonas actiniarum	PF00691	IPR006665
A0A0D8CTA2	Uncharacterized protein	354	485447	Gammaproteobacteria	Thalassomonas actiniarum	PF00691|PF13505	IPR006315|IPR006664|IPR006665|IPR027385
A0A0D8CUR4	Uncharacterized protein	454	485447	Gammaproteobacteria	Thalassomonas actiniarum	PF00691|PF09850	IPR006665|IPR017732
A0A0D8CV77	Uncharacterized protein	345	485447	Gammaproteobacteria	Thalassomonas actiniarum	PF00691|PF13677	IPR006665|IPR025713
A0A0D8CVS3	Peptidoglycan-associated protein	183	485447	Gammaproteobacteria	Thalassomonas actiniarum	PF00691	IPR006664|IPR006665|IPR014169
A0A0D8CWV0	Uncharacterized protein	281	485447	Gammaproteobacteria	Thalassomonas actiniarum	PF00691|PF18393	IPR006664|IPR006665|IPR041544
A0A0D8D268	Uncharacterized protein	432	485447	Gammaproteobacteria	Thalassomonas actiniarum	PF00691|PF09850	IPR006665|IPR017732|IPR017733
A0A0D8D2Y5	Membrane protein	209	485447	Gammaproteobacteria	Thalassomonas actiniarum	PF00691|PF13488	IPR006664|IPR006665|IPR039567
A0A0D8D3W1	Chemotaxis protein MotB	323	485447	Gammaproteobacteria	Thalassomonas actiniarum	PF00691|PF13677	IPR006665|IPR025713
A0A0D8D439	Membrane protein	281	485447	Gammaproteobacteria	Thalassomonas actiniarum	PF00691|PF18393	IPR006665|IPR041544
A0A0D8P1Q5	Membrane protein	229	56192	Gammaproteobacteria	Photobacterium iliopiscarium	PF00691|PF13488	IPR006664|IPR006665|IPR039567
A0A0D8P235	Peptidoglycan-associated protein	190	56192	Gammaproteobacteria	Photobacterium iliopiscarium	PF00691	IPR006664|IPR006665|IPR014169
A0A0D8P2F7	Flagellar protein MotY	298	56192	Gammaproteobacteria	Photobacterium iliopiscarium	PF00691|PF18393	IPR006665|IPR041544
A0A0D8P2R4	Membrane protein	341	56192	Gammaproteobacteria	Photobacterium iliopiscarium	PF00691|PF01389	IPR000498|IPR006665
A0A0D8PLY2	Membrane protein	196	56192	Gammaproteobacteria	Photobacterium iliopiscarium	PF00691	IPR006664|IPR006665
A0A0D8PRM8	Flagellar motor protein MotB	301	56192	Gammaproteobacteria	Photobacterium iliopiscarium	PF00691|PF13677	IPR006665|IPR025713
A0A0D8PS24	Membrane protein	323	56192	Gammaproteobacteria	Photobacterium iliopiscarium	PF00691|PF01389	IPR000498|IPR006664|IPR006665
A0A0D8PSM8	Membrane protein	346	56192	Gammaproteobacteria	Photobacterium iliopiscarium	PF00691|PF01389	IPR000498|IPR006664|IPR006665
A0A0D8Q7B0	Uncharacterized protein	173	56192	Gammaproteobacteria	Photobacterium iliopiscarium	PF00691	IPR006664|IPR006665
A0A0D8SZI8	Membrane protein	356	575	Gammaproteobacteria	Raoultella planticola	PF00691|PF01389	IPR000498|IPR006664|IPR006665
A0A0D8TUN4	Peptidoglycan-associated protein	174	575	Gammaproteobacteria	Raoultella planticola	PF00691	IPR006664|IPR006665|IPR014169
A0A0E3BAI4	Membrane protein	219	363952	Betaproteobacteria	Comamonas thiooxydans	PF00691|PF13488	IPR006664|IPR006665|IPR039567
A0A0E3V321	Peptidoglycan-associated protein	149	1304873	Gammaproteobacteria	Pasteurella multocida subsp. multocida OH4807	PF00691	IPR006664|IPR006665|IPR014169
A0A0E3Y9E6	Peptidoglycan-associated protein	164	1505597	Gammaproteobacteria	Blochmannia endosymbiont of Camponotus (Colobopsis	PF00691	IPR006664|IPR006665|IPR014169
A0A0E3ZIS0	Peptidoglycan-associated protein	167	1835254	Betaproteobacteria	Polynucleobacter duraquae	PF00691	IPR006664|IPR006665|IPR014169
A0A0E3ZKE6	Flagellar motor protein	342	1835254	Betaproteobacteria	Polynucleobacter duraquae	PF00691|PF13677	IPR006665|IPR025713
A0A0E3ZMR6	Outer membrane protein-related peptidoglycan-associated (Lipo)protein	195	1835254	Betaproteobacteria	Polynucleobacter duraquae	PF00691	IPR006664|IPR006665
A0A0E3ZN66	Protein Plp4	248	1304873	Gammaproteobacteria	Pasteurella multocida subsp. multocida OH4807	PF00691|PF04355	IPR006664|IPR006665|IPR007450
A0A0E3ZQ04	Outer membrane protein A	355	1304873	Gammaproteobacteria	Pasteurella multocida subsp. multocida OH4807	PF00691|PF01389	IPR000498|IPR006664|IPR006665
A0A0E3ZR21	OmpA/MotB domain-containing protein	167	1304873	Gammaproteobacteria	Pasteurella multocida subsp. multocida OH4807	PF00691	IPR006664|IPR006665
A0A0E9MK55	Uncharacterized protein	1401	1219043	Alphaproteobacteria	Sphingomonas changbaiensis NBRC 104936	PF00082|PF00691|PF01471	IPR000209|IPR002477|IPR006665
A0A0E9MNI4	Uncharacterized protein	379	1219043	Alphaproteobacteria	Sphingomonas changbaiensis NBRC 104936	PF00691|PF13505	IPR006664|IPR006665|IPR027385
A0A0E9MP99	OmpA family protein	299	1219043	Alphaproteobacteria	Sphingomonas changbaiensis NBRC 104936	PF00691	IPR006664|IPR006665
A0A0E9MQR8	Chemotaxis protein MotB	304	1219043	Alphaproteobacteria	Sphingomonas changbaiensis NBRC 104936	PF00691|PF13677	IPR006665|IPR025713
A0A0E9MS81	Peptidoglycan-associated protein	168	1219043	Alphaproteobacteria	Sphingomonas changbaiensis NBRC 104936	PF00691	IPR006664|IPR006665|IPR014169
A0A0F2NTU6	Uncharacterized protein	439	1629722	Gammaproteobacteria	Gammaproteobacteria bacterium BRH_c0	PF00691|PF12849	IPR006664|IPR006665|IPR024370
A0A0F2NW87	Uncharacterized protein	236	1629722	Gammaproteobacteria	Gammaproteobacteria bacterium BRH_c0	PF00691	IPR006664|IPR006665
A0A0F2P170	Membrane protein	217	1629722	Gammaproteobacteria	Gammaproteobacteria bacterium BRH_c0	PF00691|PF13488	IPR006664|IPR006665|IPR039567
A0A0F2P5N4	Peptidoglycan-associated protein	164	1629722	Gammaproteobacteria	Gammaproteobacteria bacterium BRH_c0	PF00691	IPR006664|IPR006665|IPR014169
A0A0F2P880	Membrane protein	287	1629722	Gammaproteobacteria	Gammaproteobacteria bacterium BRH_c0	PF00691	IPR006664|IPR006665
A0A0F3IFU9	Peptidoglycan-associated protein	196	1632867	Gammaproteobacteria	Methylocucumis oryzae	PF00691	IPR006664|IPR006665|IPR014169
A0A0F3IKY0	Flagellar motor protein MotB	122	1632867	Gammaproteobacteria	Methylocucumis oryzae	PF00691	IPR006664|IPR006665
A0A0F3IN19	Flagellar motor protein MotB	173	1632867	Gammaproteobacteria	Methylocucumis oryzae	PF00691|PF13441	IPR006664|IPR006665|IPR027367
A0A0F3INM6	Peptidoglycan-associated protein	184	552518	Alphaproteobacteria	Elstera litoralis	PF00691	IPR006664|IPR006665|IPR014169
A0A0F3IQS3	Uncharacterized protein	461	552518	Alphaproteobacteria	Elstera litoralis	PF00691	IPR006665
A0A0F3IRA8	Uncharacterized protein	120	552518	Alphaproteobacteria	Elstera litoralis	PF00691	IPR006665
A0A0F3IS90	Uncharacterized protein	333	552518	Alphaproteobacteria	Elstera litoralis	PF00691|PF13677	IPR006665|IPR025713
A0A0F3IT05	Uncharacterized protein	263	552518	Alphaproteobacteria	Elstera litoralis	PF00691	IPR006664|IPR006665
A0A0F3IT36	Uncharacterized protein	186	552518	Alphaproteobacteria	Elstera litoralis	PF00691	IPR006665
A0A0F3IVN9	Peptidoglycan-associated protein	165	552518	Alphaproteobacteria	Elstera litoralis	PF00691	IPR006664|IPR006665|IPR014169
A0A0F3IZI7	Uncharacterized protein	196	552518	Alphaproteobacteria	Elstera litoralis	PF00691	IPR006664|IPR006665
A0A0F3K1K7	Flagellar motor protein MotB	300	332411	Betaproteobacteria	Aquitalea magnusonii	PF00691|PF13677	IPR006665|IPR025713
A0A0F3K8B0	Membrane protein	224	332411	Betaproteobacteria	Aquitalea magnusonii	PF00691	IPR006664|IPR006665
A0A0F3KB03	Flagellar motor protein MotD	273	332411	Betaproteobacteria	Aquitalea magnusonii	PF00691|PF13677	IPR006665|IPR025713
A0A0F3KBT8	Membrane protein	221	332411	Betaproteobacteria	Aquitalea magnusonii	PF00691|PF13488	IPR006664|IPR006665|IPR039567
A0A0F3KF93	Peptidoglycan-associated protein	176	332411	Betaproteobacteria	Aquitalea magnusonii	PF00691	IPR006664|IPR006665|IPR014169
A0A0F3ML50	Peptidoglycan-associated lipoprotein	201	1359168	Alphaproteobacteria	Orientia chuto str. Dubai	PF00691	IPR006664|IPR006665|IPR014169
A0A0F4NT79	Membrane protein	349	43662	Gammaproteobacteria	Pseudoalteromonas piscicida	PF00691|PF13505	IPR006664|IPR006665|IPR027385
A0A0F4NVM3	Flagellar motor protein MotB	309	43662	Gammaproteobacteria	Pseudoalteromonas piscicida	PF00691|PF13677	IPR006665|IPR025713
A0A0F4NY82	Membrane protein	208	43662	Gammaproteobacteria	Pseudoalteromonas piscicida	PF00691|PF13488	IPR006664|IPR006665|IPR039567
A0A0F4PBL9	Membrane protein	301	43662	Gammaproteobacteria	Pseudoalteromonas piscicida	PF00691|PF18393	IPR006664|IPR006665|IPR041544
A0A0F4PHH7	Flagellar motor protein MotB	308	151081	Gammaproteobacteria	Pseudoalteromonas ruthenica	PF00691|PF13677	IPR006665|IPR025713
A0A0F4PHM2	Peptidoglycan-associated protein	177	151081	Gammaproteobacteria	Pseudoalteromonas ruthenica	PF00691	IPR006664|IPR006665|IPR014169
A0A0F4PIY4	Membrane protein	210	151081	Gammaproteobacteria	Pseudoalteromonas ruthenica	PF00691|PF13488	IPR006664|IPR006665|IPR039567
A0A0F4PJU9	Type VI secretion protein	441	151081	Gammaproteobacteria	Pseudoalteromonas ruthenica	PF00691|PF09850	IPR006665|IPR017732|IPR017733
A0A0F4PP45	Chemotaxis protein	326	151081	Gammaproteobacteria	Pseudoalteromonas ruthenica	PF00691|PF13677	IPR006665|IPR025713
A0A0F4PU12	Uncharacterized protein	238	151081	Gammaproteobacteria	Pseudoalteromonas ruthenica	PF00691	IPR006664|IPR006665
A0A0F4PYX2	Uncharacterized protein	496	151081	Gammaproteobacteria	Pseudoalteromonas ruthenica	PF00691	IPR006664|IPR006665
A0A0F4Q003	Uncharacterized protein	556	151081	Gammaproteobacteria	Pseudoalteromonas ruthenica	PF00691|PF12849	IPR006665|IPR024370
A0A0F4Q2H4	Membrane protein	288	151081	Gammaproteobacteria	Pseudoalteromonas ruthenica	PF00691|PF18393	IPR006664|IPR006665|IPR041544
A0A0F4Q2W2	Uncharacterized protein	353	151081	Gammaproteobacteria	Pseudoalteromonas ruthenica	PF00691|PF13505	IPR006664|IPR006665|IPR027385
A0A0F4QBU4	Peptidoglycan-associated protein	177	43662	Gammaproteobacteria	Pseudoalteromonas piscicida	PF00691	IPR006664|IPR006665|IPR014169
A0A0F4QEK6	Peptidoglycan-associated protein	177	43658	Gammaproteobacteria	Pseudoalteromonas rubra	PF00691	IPR006664|IPR006665|IPR014169
A0A0F4QG46	Membrane protein	211	43658	Gammaproteobacteria	Pseudoalteromonas rubra	PF00691|PF13488	IPR006664|IPR006665|IPR039567
A0A0F4QKK4	Uncharacterized protein	212	579484	Gammaproteobacteria	Marinomonas sp. S3726	PF00691	IPR006664|IPR006665
A0A0F4QMH5	Peptidoglycan-associated protein	212	579484	Gammaproteobacteria	Marinomonas sp. S3726	PF00691	IPR006664|IPR006665|IPR014169
A0A0F4QQ45	Thrombospondin	204	579484	Gammaproteobacteria	Marinomonas sp. S3726	PF00691	IPR006664|IPR006665
A0A0F4QR63	Membrane protein	348	43658	Gammaproteobacteria	Pseudoalteromonas rubra	PF00691|PF13505	IPR006664|IPR006665|IPR027385
A0A0F4QSV0	Membrane protein	291	43658	Gammaproteobacteria	Pseudoalteromonas rubra	PF00691|PF18393	IPR006664|IPR006665|IPR041544
A0A0F4QTI8	Flagellar motor protein	303	579484	Gammaproteobacteria	Marinomonas sp. S3726	PF00691|PF13677	IPR006665|IPR025713
A0A0F4R141	Flagellar motor protein MotB	334	579484	Gammaproteobacteria	Marinomonas sp. S3726	PF00691|PF13677	IPR006665|IPR025713
A0A0F4R175	Flagellar motor protein MotB	310	43658	Gammaproteobacteria	Pseudoalteromonas rubra	PF00691|PF13677	IPR006665|IPR025713
A0A0F4R1U2	Flagellar motor protein	258	579484	Gammaproteobacteria	Marinomonas sp. S3726	PF00691|PF13677	IPR006665|IPR025713
A0A0F4R2Q4	Membrane protein	298	579484	Gammaproteobacteria	Marinomonas sp. S3726	PF00691|PF18393	IPR006664|IPR006665|IPR041544
A0A0F4R7P4	Thrombospondin	201	579484	Gammaproteobacteria	Marinomonas sp. S3726	PF00691	IPR006664|IPR006665
A0A0F4RBX4	Flagellar motor protein	281	579484	Gammaproteobacteria	Marinomonas sp. S3726	PF00691|PF13677	IPR006665|IPR025713
A0A0F4RDS0	Membrane protein	650	579483	Alphaproteobacteria	Loktanella sp. S4079	PF00691|PF04972	IPR006664|IPR006665|IPR007055
A0A0F4RE22	Membrane protein	215	579483	Alphaproteobacteria	Loktanella sp. S4079	PF00691	IPR006664|IPR006665
A0A0F4RF21	Uncharacterized protein	316	579483	Alphaproteobacteria	Loktanella sp. S4079	PF00691	IPR006664|IPR006665
A0A0F4RFE6	Peptidoglycan-associated protein	172	579483	Alphaproteobacteria	Loktanella sp. S4079	PF00691	IPR006664|IPR006665|IPR014169
A0A0F4RFR5	Uncharacterized protein	502	579483	Alphaproteobacteria	Loktanella sp. S4079	PF00691|PF12849	IPR006665|IPR024370
A0A0F4RGF5	Uncharacterized protein	517	579483	Alphaproteobacteria	Loktanella sp. S4079	PF00691|PF12849	IPR006665|IPR024370
A0A0F4RH25	Uncharacterized protein	526	579483	Alphaproteobacteria	Loktanella sp. S4079	PF00691|PF12849	IPR006664|IPR006665|IPR024370
A0A0F4RHP6	Cell envelope biogenesis protein OmpA	304	579483	Alphaproteobacteria	Loktanella sp. S4079	PF00691	IPR006664|IPR006665
A0A0F4RJ17	Uncharacterized protein	485	579483	Alphaproteobacteria	Loktanella sp. S4079	PF00691|PF12849	IPR006665|IPR024370
A0A0F4RKK8	Uncharacterized protein	515	579483	Alphaproteobacteria	Loktanella sp. S4079	PF00691|PF12849	IPR006665|IPR024370
A0A0F4RM81	Membrane protein	219	579483	Alphaproteobacteria	Loktanella sp. S4079	PF00691|PF13488	IPR006664|IPR006665|IPR039567
A0A0F4RMG6	Flagellar motor protein	575	579483	Alphaproteobacteria	Loktanella sp. S4079	PF00691	IPR006665
A0A0F4RPK0	Uncharacterized protein	599	579483	Alphaproteobacteria	Loktanella sp. S4079	PF00691|PF12849	IPR006665|IPR024370
A0A0F5AM00	Uncharacterized protein	202	1406902	Gammaproteobacteria	Salinivibrio sp. KP-1	PF00691	IPR006664|IPR006665
A0A0F5AMR5	Uncharacterized protein	223	1406902	Gammaproteobacteria	Salinivibrio sp. KP-1	PF00691	IPR006664|IPR006665
A0A0F5AMY5	Membrane protein	212	1406902	Gammaproteobacteria	Salinivibrio sp. KP-1	PF00691|PF13488	IPR006664|IPR006665|IPR039567
A0A0F5ANH8	Flagellar protein MotY	293	1406902	Gammaproteobacteria	Salinivibrio sp. KP-1	PF00691|PF18393	IPR006664|IPR006665|IPR041544
A0A0F5ANJ9	Peptidoglycan-associated protein	172	1406902	Gammaproteobacteria	Salinivibrio sp. KP-1	PF00691	IPR006664|IPR006665|IPR014169
A0A0F5AP80	Uncharacterized protein	200	1406902	Gammaproteobacteria	Salinivibrio sp. KP-1	PF00691	IPR006664|IPR006665
A0A0F5AU44	Membrane protein	340	1406902	Gammaproteobacteria	Salinivibrio sp. KP-1	PF00691|PF01389	IPR000498|IPR006664|IPR006665
A0A0F5AU49	Flagellar motor protein MotB	312	1406902	Gammaproteobacteria	Salinivibrio sp. KP-1	PF00691|PF13677	IPR006665|IPR025713
A0A0F5FEX5	Peptidoglycan-associated protein	157	429727	Alphaproteobacteria	Devosia chinhatensis	PF00691	IPR006664|IPR006665|IPR014169
A0A0F5FFN8	Uncharacterized protein	341	429727	Alphaproteobacteria	Devosia chinhatensis	PF00691	IPR006665
A0A0F5FJ68	Cell envelope biogenesis protein OmpA	221	429727	Alphaproteobacteria	Devosia chinhatensis	PF00691|PF13488	IPR006664|IPR006665|IPR039567
A0A0F5FMT1	Uncharacterized protein	306	429727	Alphaproteobacteria	Devosia chinhatensis	PF00691|PF13677	IPR006665|IPR025713
A0A0F5FPJ6	Uncharacterized protein	749	429727	Alphaproteobacteria	Devosia chinhatensis	PF00691	IPR006665
A0A0F5JVF6	Membrane protein	221	28092	Betaproteobacteria	Robbsia andropogonis	PF00691	IPR006664|IPR006665
A0A0F5K2N1	Uncharacterized protein	335	28092	Betaproteobacteria	Robbsia andropogonis	PF00691|PF13677	IPR006665|IPR025713
A0A0F5K2X1	Peptidoglycan-associated protein	167	28092	Betaproteobacteria	Robbsia andropogonis	PF00691	IPR006664|IPR006665
A0A0F5K4V9	Membrane protein	200	28092	Betaproteobacteria	Robbsia andropogonis	PF00691	IPR006664|IPR006665
A0A0F5K5S9	Uncharacterized protein	315	28092	Betaproteobacteria	Robbsia andropogonis	PF00691	IPR006664|IPR006665
A0A0F5K5U4	Uncharacterized protein	219	28092	Betaproteobacteria	Robbsia andropogonis	PF00691	IPR006665
A0A0F5K739	Uncharacterized protein	356	28092	Betaproteobacteria	Robbsia andropogonis	PF00691	IPR006664|IPR006665
A0A0F5L0W0	Peptidoglycan-associated protein	166	361041	Alphaproteobacteria	Devosia soli	PF00691	IPR006664|IPR006665|IPR014169
A0A0F5L0X8	Uncharacterized protein	341	361041	Alphaproteobacteria	Devosia soli	PF00691	IPR006665
A0A0F5L3A6	Cell envelope biogenesis protein OmpA	221	361041	Alphaproteobacteria	Devosia soli	PF00691|PF13488	IPR006664|IPR006665|IPR039567
A0A0F5LCW1	Uncharacterized protein	306	361041	Alphaproteobacteria	Devosia soli	PF00691|PF13677	IPR006665|IPR025713
A0A0F5LDJ2	Uncharacterized protein	620	361041	Alphaproteobacteria	Devosia soli	PF00691	IPR006665
A0A0F5LK60	Uncharacterized protein	188	361041	Alphaproteobacteria	Devosia soli	PF00691	IPR006664|IPR006665
A0A0F5MNM1	Motility protein B	305	1607817	Alphaproteobacteria	Candidatus Arcanobacter lacustris	PF00691|PF13677	IPR006665|IPR025713
A0A0F5MNN1	Uncharacterized protein	329	1607817	Alphaproteobacteria	Candidatus Arcanobacter lacustris	PF00691	IPR006665
A0A0F5MPS8	Peptidoglycan-associated protein	154	1607817	Alphaproteobacteria	Candidatus Arcanobacter lacustris	PF00691	IPR006664|IPR006665|IPR014169
A0A0F5Q5D7	Cell envelope biogenesis protein OmpA	220	1293439	Alphaproteobacteria	Devosia epidermidihirudinis	PF00691|PF13488	IPR006664|IPR006665|IPR039567
A0A0F5QBH0	Uncharacterized protein	306	1293439	Alphaproteobacteria	Devosia epidermidihirudinis	PF00691|PF13677	IPR006665|IPR025713
A0A0F5QBU7	Uncharacterized protein	701	1293439	Alphaproteobacteria	Devosia epidermidihirudinis	PF00691	IPR006665
A0A0F5QCW6	Flagellar motor protein MotB	365	1293439	Alphaproteobacteria	Devosia epidermidihirudinis	PF00691|PF16234	IPR006664|IPR006665
A0A0F5QF90	Uncharacterized protein	812	1293439	Alphaproteobacteria	Devosia epidermidihirudinis	PF00691|PF04972	IPR006664|IPR006665|IPR007055
A0A0F5QHK4	Flagellar motor protein MotB	185	1293439	Alphaproteobacteria	Devosia epidermidihirudinis	PF00691	IPR006665
A0A0F5QJT5	Uncharacterized protein	341	1293439	Alphaproteobacteria	Devosia epidermidihirudinis	PF00691	IPR006665
A0A0F5QK64	Peptidoglycan-associated protein	151	1293439	Alphaproteobacteria	Devosia epidermidihirudinis	PF00691	IPR006664|IPR006665|IPR014169
A0A0F5V6P4	Uncharacterized protein	1040	265726	Gammaproteobacteria	Photobacterium halotolerans	PF00691	IPR006664|IPR006665
A0A0F5V7U9	Peptidoglycan-associated protein	177	265726	Gammaproteobacteria	Photobacterium halotolerans	PF00691	IPR006664|IPR006665|IPR014169
A0A0F5V8K0	Membrane protein	230	265726	Gammaproteobacteria	Photobacterium halotolerans	PF00691|PF13488	IPR006664|IPR006665|IPR039567
A0A0F5VA08	Flagellar motor protein MotB	313	265726	Gammaproteobacteria	Photobacterium halotolerans	PF00691|PF13677	IPR006665|IPR025713
A0A0F5VAB4	Membrane protein	196	265726	Gammaproteobacteria	Photobacterium halotolerans	PF00691	IPR006664|IPR006665
A0A0F5VBC0	Membrane protein	328	265726	Gammaproteobacteria	Photobacterium halotolerans	PF00691|PF01389	IPR000498|IPR006664|IPR006665
A0A0F5VBG5	Uncharacterized protein	248	265726	Gammaproteobacteria	Photobacterium halotolerans	PF00691	IPR006664|IPR006665
A0A0F5VDL7	Membrane protein	197	265726	Gammaproteobacteria	Photobacterium halotolerans	PF00691	IPR006664|IPR006665
A0A0F5VEI2	Uncharacterized protein	346	265726	Gammaproteobacteria	Photobacterium halotolerans	PF00691|PF01389	IPR000498|IPR006664|IPR006665
A0A0F5VGU8	Flagellar protein MotY	295	265726	Gammaproteobacteria	Photobacterium halotolerans	PF00691|PF18393	IPR006664|IPR006665|IPR041544
A0A0F6RB31	OmpA/MotB domain protein	376	914150	Gammaproteobacteria	Kangiella geojedonensis	PF00691|PF02412|PF13505	IPR006664|IPR006665|IPR027385
A0A0F6RCT3	Membrane protein	221	914150	Gammaproteobacteria	Kangiella geojedonensis	PF00691|PF05433	IPR006664|IPR006665|IPR008816
A0A0F6RD63	OmpA/MotB domain protein	455	914150	Gammaproteobacteria	Kangiella geojedonensis	PF00691|PF12849	IPR006665|IPR024370
A0A0F6SDY4	Flagellar motor rotation protein MotB	222	927083	Deltaproteobacteria	Sandaracinus amylolyticus	PF00691	IPR006665
A0A0F6SEJ2	Flagellar motor rotation protein MotB	372	927083	Deltaproteobacteria	Sandaracinus amylolyticus	PF00691	IPR006664|IPR006665
A0A0F6SFB4	Flagellar motor rotation protein MotB	425	927083	Deltaproteobacteria	Sandaracinus amylolyticus	PF00691	IPR006664|IPR006665
A0A0F6SGZ1	Outer membrane protein	311	927083	Deltaproteobacteria	Sandaracinus amylolyticus	PF00691|PF14346	IPR006664|IPR006665|IPR025511
A0A0F6SHD4	Outer membrane protein A	361	927083	Deltaproteobacteria	Sandaracinus amylolyticus	PF00691	IPR006664|IPR006665
A0A0F6SHJ9	Outer membrane lipoprotein omp16	558	927083	Deltaproteobacteria	Sandaracinus amylolyticus	PF00691|PF06078	IPR006664|IPR006665
A0A0F6TQ86	Cadherin domain-containing secreted protein	8155	914150	Gammaproteobacteria	Kangiella geojedonensis	PF00691|PF03160	IPR002126|IPR003644|IPR006664|IPR006665|IPR022409
A0A0F6TR34	Peptidoglycan-associated protein	172	914150	Gammaproteobacteria	Kangiella geojedonensis	PF00691	IPR006664|IPR006665|IPR014169
A0A0F6VZ22	OmpA/MotB domain protein	768	927083	Deltaproteobacteria	Sandaracinus amylolyticus	PF00691|PF13620	IPR006664|IPR006665
A0A0F6VZ26	Outer membrane protein	284	927083	Deltaproteobacteria	Sandaracinus amylolyticus	PF00691	IPR006664|IPR006665
A0A0F6VZG2	Internalin	2107	927083	Deltaproteobacteria	Sandaracinus amylolyticus	PF00691|PF01345|PF17936	IPR001434|IPR006665|IPR041498
A0A0F6W081	Serine/threonine protein kinase	877	927083	Deltaproteobacteria	Sandaracinus amylolyticus	PF00069|PF00691|PF12849	IPR000719|IPR006665|IPR024370
A0A0F6W277	Flagellar motor rotation protein MotB	270	927083	Deltaproteobacteria	Sandaracinus amylolyticus	PF00691	IPR006664|IPR006665
A0A0F6W6Z0	Outer membrane protein A	397	927083	Deltaproteobacteria	Sandaracinus amylolyticus	PF00691	IPR006664|IPR006665
A0A0F6W9T1	Flagellar motor rotation protein MotB	295	927083	Deltaproteobacteria	Sandaracinus amylolyticus	PF00691	IPR006665
A0A0F6YG59	Calcium-binding acidic-repeat protein	216	927083	Deltaproteobacteria	Sandaracinus amylolyticus	PF00691	IPR006665
A0A0F6YHC2	OmpA/MotB domain	571	927083	Deltaproteobacteria	Sandaracinus amylolyticus	PF00691	IPR006664|IPR006665
A0A0F6YKJ9	Flagellar motor rotation protein MotB	679	927083	Deltaproteobacteria	Sandaracinus amylolyticus	PF00691	IPR006664|IPR006665
A0A0F6YLL8	Calcium-binding acidic-repeat protein	390	927083	Deltaproteobacteria	Sandaracinus amylolyticus	PF00691	IPR006665
A0A0F6YMG0	18K peptidoglycan-associated outer membrane lipoprotein	219	927083	Deltaproteobacteria	Sandaracinus amylolyticus	PF00691	IPR006664|IPR006665
A0A0F6YN39	Flagellar motor rotation protein MotB	294	927083	Deltaproteobacteria	Sandaracinus amylolyticus	PF00691	IPR006665
A0A0F7JUF6	Uncharacterized protein	274	1543721	Gammaproteobacteria	Sedimenticola thiotaurini	PF00691|PF13677	IPR006665|IPR025713
A0A0F7JVW8	Flagellar motor protein MotB	425	1543721	Gammaproteobacteria	Sedimenticola thiotaurini	PF00691	IPR006665
A0A0F7JWY6	Flagellar motor protein MotB	287	1543721	Gammaproteobacteria	Sedimenticola thiotaurini	PF00691|PF13677	IPR006665|IPR025713
A0A0F7JX23	Uncharacterized protein	222	1543721	Gammaproteobacteria	Sedimenticola thiotaurini	PF00691|PF13488	IPR006664|IPR006665|IPR039567
A0A0F7JXS1	Uncharacterized protein	241	1543721	Gammaproteobacteria	Sedimenticola thiotaurini	PF00691	IPR006664|IPR006665
A0A0F7JZY7	Uncharacterized protein	246	1543721	Gammaproteobacteria	Sedimenticola thiotaurini	PF00691|PF13677	IPR006665|IPR025713
A0A0F7K2F7	Uncharacterized protein	186	1543721	Gammaproteobacteria	Sedimenticola thiotaurini	PF00691|PF02412	IPR006664|IPR006665
A0A0F7K493	Peptidoglycan-associated protein	181	1543721	Gammaproteobacteria	Sedimenticola thiotaurini	PF00691	IPR006664|IPR006665|IPR014169
A0A0F7KBR5	Membrane protein	222	44574	Betaproteobacteria	Nitrosomonas communis	PF00691|PF13441	IPR006664|IPR006665|IPR027367
A0A0F7KDA5	Peptidoglycan-associated protein	175	44574	Betaproteobacteria	Nitrosomonas communis	PF00691	IPR006664|IPR006665|IPR014169
A0A0F7KEF2	Flagellar motor protein MotB	237	44574	Betaproteobacteria	Nitrosomonas communis	PF00691	IPR006664|IPR006665
A0A0F7KFB5	Membrane protein	211	44574	Betaproteobacteria	Nitrosomonas communis	PF00691	IPR006664|IPR006665
A0A0F7KKG7	Uncharacterized protein	245	44574	Betaproteobacteria	Nitrosomonas communis	PF00691|PF14346	IPR006664|IPR006665|IPR025511
A0A0F7KPT0	Outer membrane porin F	304	1267766	Alphaproteobacteria	Altererythrobacter atlanticus	PF00691	IPR006664|IPR006665
A0A0F7KQB6	Outer membrane protein	373	1267766	Alphaproteobacteria	Altererythrobacter atlanticus	PF00691|PF13505	IPR006664|IPR006665|IPR027385
A0A0F7KSL9	Putative lipoprotein YiaD	226	1267766	Alphaproteobacteria	Altererythrobacter atlanticus	PF00691|PF13488	IPR006664|IPR006665|IPR039567
A0A0F7KV04	Outer membrane protein	374	1267766	Alphaproteobacteria	Altererythrobacter atlanticus	PF00691|PF13505	IPR006664|IPR006665|IPR027385
A0A0F7KW59	Photosystem I P700 chlorophyll a apoprotein A2	216	1267766	Alphaproteobacteria	Altererythrobacter atlanticus	PF00691	IPR006664|IPR006665
A0A0F7KX45	Outer membrane protein A	248	1267766	Alphaproteobacteria	Altererythrobacter atlanticus	PF00691	IPR006664|IPR006665
A0A0F7KXZ8	Peptidoglycan-associated protein	172	1267766	Alphaproteobacteria	Altererythrobacter atlanticus	PF00691	IPR006664|IPR006665|IPR014169
A0A0F7KY77	Motility protein B	276	1267766	Alphaproteobacteria	Altererythrobacter atlanticus	PF00691|PF13677	IPR006665|IPR025713
A0A0F7KYJ2	Outer membrane lipoprotein Omp16	2004	1267766	Alphaproteobacteria	Altererythrobacter atlanticus	PF00691|PF01345	IPR001434|IPR006664|IPR006665
A0A0F7M072	Outer membrane protein/peptidoglycan-associated (Lipo)protein	221	1620392	Gammaproteobacteria	Spongiibacter sp. IMCC21906	PF00691|PF13488	IPR006664|IPR006665|IPR039567
A0A0F7M0Y5	Outer membrane protein/peptidoglycan-associated (Lipo)protein	367	1620392	Gammaproteobacteria	Spongiibacter sp. IMCC21906	PF00691|PF02412|PF13505	IPR006664|IPR006665|IPR027385
A0A0F7M192	Outer membrane protein/peptidoglycan-associated (Lipo)protein	535	1620392	Gammaproteobacteria	Spongiibacter sp. IMCC21906	PF00691|PF02412|PF13505	IPR006664|IPR006665|IPR027385
A0A0F7M1X4	OmpA family	279	1620392	Gammaproteobacteria	Spongiibacter sp. IMCC21906	PF00691	IPR006664|IPR006665
A0A0F7M4G6	Outer membrane protein/peptidoglycan-associated (Lipo)protein	306	1620392	Gammaproteobacteria	Spongiibacter sp. IMCC21906	PF00691	IPR006664|IPR006665
A0A0F7M4Q0	Outer membrane protein/peptidoglycan-associated (Lipo)protein	367	1620392	Gammaproteobacteria	Spongiibacter sp. IMCC21906	PF00691|PF02412|PF13505	IPR006664|IPR006665|IPR027385
A0A0F7M5B3	Outer membrane protein/peptidoglycan-associated (Lipo)protein	164	1620392	Gammaproteobacteria	Spongiibacter sp. IMCC21906	PF00691	IPR006664|IPR006665
A0A0F7M6S4	OmpA family	609	1620392	Gammaproteobacteria	Spongiibacter sp. IMCC21906	PF00691	IPR006664|IPR006665
A0A0F7M794	Flagellar motor protein	238	1620392	Gammaproteobacteria	Spongiibacter sp. IMCC21906	PF00691|PF13677	IPR006665|IPR025713
A0A0F7M7C6	Thrombospondin type 3 repeat-containing protein	431	1620392	Gammaproteobacteria	Spongiibacter sp. IMCC21906	PF00691|PF02412	IPR006664|IPR006665
A0A0F7M993	OmpA family	231	1620392	Gammaproteobacteria	Spongiibacter sp. IMCC21906	PF00691	IPR006665
A0A0F7M9J6	Outer membrane protein/peptidoglycan-associated (Lipo)protein	348	1620392	Gammaproteobacteria	Spongiibacter sp. IMCC21906	PF00691|PF13505	IPR006664|IPR006665|IPR027385
A0A0F7PHU0	Flagellar motor protein	343	1620421	Alphaproteobacteria	Hoeflea sp. IMCC20628	PF00691	IPR006665
A0A0F7PIY9	Peptidoglycan-associated protein	168	1620421	Alphaproteobacteria	Hoeflea sp. IMCC20628	PF00691	IPR006664|IPR006665|IPR014169
A0A0F7PKZ4	Outer membrane protein/peptidoglycan-associated (Lipo)protein	589	1620421	Alphaproteobacteria	Hoeflea sp. IMCC20628	PF00691	IPR006664|IPR006665
A0A0F7PM99	Outer membrane protein/peptidoglycan-associated (Lipo)protein	215	1620421	Alphaproteobacteria	Hoeflea sp. IMCC20628	PF00691|PF13488	IPR006664|IPR006665|IPR039567
A0A0F7PMY8	Outer membrane protein/peptidoglycan-associated (Lipo)protein	731	1620421	Alphaproteobacteria	Hoeflea sp. IMCC20628	PF00691	IPR006665
A0A0F7PRB5	Flagellar motor protein	422	1620421	Alphaproteobacteria	Hoeflea sp. IMCC20628	PF00691|PF13677	IPR006665|IPR025713
A0A0F7PRI3	Flagellar motor protein	302	1620421	Alphaproteobacteria	Hoeflea sp. IMCC20628	PF00691	IPR006665
A0A0G2ZDZ5	Chemotaxis protein MotB	298	48	Deltaproteobacteria	Archangium gephyra	PF00691	IPR006665
A0A0G2ZIU4	OmpA domain protein	620	48	Deltaproteobacteria	Archangium gephyra	PF00691|PF02412	IPR006664|IPR006665
A0A0G2ZLN1	Chemotaxis protein MotB	281	48	Deltaproteobacteria	Archangium gephyra	PF00691	IPR006665
A0A0G2ZLS9	OmpA family protein	339	48	Deltaproteobacteria	Archangium gephyra	PF00691	IPR006665
A0A0G2ZMB6	OmpA domain protein	609	48	Deltaproteobacteria	Archangium gephyra	PF00691|PF02412	IPR006664|IPR006665
A0A0G2ZNT0	Outer membrane protein A	562	48	Deltaproteobacteria	Archangium gephyra	PF00691	IPR006664|IPR006665
A0A0G2ZNU0	Outer membrane protein	600	48	Deltaproteobacteria	Archangium gephyra	PF00691	IPR006664|IPR006665
A0A0G2ZPR5	Internalin| putative	2526	48	Deltaproteobacteria	Archangium gephyra	PF00691|PF01345|PF17936	IPR001434|IPR006664|IPR006665|IPR041498
A0A0G2ZQY5	Internalin| putative	1587	48	Deltaproteobacteria	Archangium gephyra	PF00691|PF01345	IPR001434|IPR006664|IPR006665
A0A0G2ZRK6	OmpA domain protein	641	48	Deltaproteobacteria	Archangium gephyra	PF00691|PF13620	IPR006664|IPR006665
A0A0G2ZSA8	Outer membrane protein A	405	48	Deltaproteobacteria	Archangium gephyra	PF00691	IPR006665
A0A0G2ZTA1	Internalin| putative	565	48	Deltaproteobacteria	Archangium gephyra	PF00691|PF02412|PF14346	IPR006664|IPR006665|IPR025511
A0A0G2ZTE4	18K peptidoglycan-associated outer membrane lipoprotein	246	48	Deltaproteobacteria	Archangium gephyra	PF00691	IPR006664|IPR006665
A0A0G2ZV15	Outer membrane protein A	209	48	Deltaproteobacteria	Archangium gephyra	PF00691|PF13441	IPR006664|IPR006665|IPR027367
A0A0G2ZX63	OmpA domain protein	480	48	Deltaproteobacteria	Archangium gephyra	PF00691	IPR006664|IPR006665
A0A0G2ZYV1	OmpA domain protein	605	48	Deltaproteobacteria	Archangium gephyra	PF00691|PF02412	IPR006665
A0A0G3A0Q7	Outer membrane protein A	171	48	Deltaproteobacteria	Archangium gephyra	PF00691	IPR006665
A0A0G3A2A4	Flagellar motor rotation protein MotB	549	48	Deltaproteobacteria	Archangium gephyra	PF00691	IPR006664|IPR006665
A0A0G3A378	Chemotaxis protein MotB	293	48	Deltaproteobacteria	Archangium gephyra	PF00691	IPR006665
A0A0G3A599	OmpA domain protein	574	48	Deltaproteobacteria	Archangium gephyra	PF00691|PF02412	IPR006664|IPR006665
A0A0G3A692	Internalin| putative	1139	48	Deltaproteobacteria	Archangium gephyra	PF00691|PF01345|PF13557	IPR001434|IPR006664|IPR006665
A0A0G3A7B4	Chemotaxis protein MotB	280	48	Deltaproteobacteria	Archangium gephyra	PF00691	IPR006665
A0A0G3A7Q4	OmpA domain protein	1417	48	Deltaproteobacteria	Archangium gephyra	PF00691|PF17963	IPR006664|IPR006665
A0A0G3A951	Flagellar motor rotation protein MotB	368	48	Deltaproteobacteria	Archangium gephyra	PF00691|PF14346	IPR006664|IPR006665|IPR025511
A0A0G3BLL8	Uncharacterized protein	333	413882	Betaproteobacteria	[Polyangium] brachysporum	PF00691	IPR006664|IPR006665
A0A0G3BMF8	Cell envelope biogenesis protein OmpA	281	413882	Betaproteobacteria	[Polyangium] brachysporum	PF00691	IPR006664|IPR006665
A0A0G3BND8	Type VI secretion system protein ImpK	432	413882	Betaproteobacteria	[Polyangium] brachysporum	PF00691|PF09850	IPR006665|IPR017732|IPR017733
A0A0G3BNY1	Peptidoglycan-binding protein	163	413882	Betaproteobacteria	[Polyangium] brachysporum	PF00691	IPR006664|IPR006665|IPR014169
A0A0G3BQT3	Membrane protein	227	413882	Betaproteobacteria	[Polyangium] brachysporum	PF00691|PF13488	IPR006664|IPR006665|IPR039567
A0A0G3BRF1	Uncharacterized protein	444	413882	Betaproteobacteria	[Polyangium] brachysporum	PF00691	IPR006665
A0A0G3BRH4	Major porin and structural outer membrane porin	291	413882	Betaproteobacteria	[Polyangium] brachysporum	PF00691|PF14346	IPR006664|IPR006665|IPR025511
A0A0G3BSK8	Flagellar motor protein MotB	326	413882	Betaproteobacteria	[Polyangium] brachysporum	PF00691|PF13677	IPR006665|IPR025713
A0A0G3BSR5	Membrane protein	214	413882	Betaproteobacteria	[Polyangium] brachysporum	PF00691	IPR006664|IPR006665
A0A0G3BUW3	Uncharacterized protein	202	413882	Betaproteobacteria	[Polyangium] brachysporum	PF00691	IPR006664|IPR006665
A0A0G3BVT7	Flagellar motor protein MotB	404	413882	Betaproteobacteria	[Polyangium] brachysporum	PF00691	IPR006665
A0A0G3CIV9	Peptidoglycan-associated protein	169	82985	Gammaproteobacteria	Pragia fontium	PF00691	IPR006664|IPR006665|IPR014169
A0A0G3CKZ7	Uncharacterized protein	318	82985	Gammaproteobacteria	Pragia fontium	PF00691|PF13677	IPR006665|IPR025713
A0A0G3CNR6	Inner membrane lipoprotein YiaD	219	82985	Gammaproteobacteria	Pragia fontium	PF00691|PF13488	IPR006664|IPR006665|IPR039567
A0A0G3CPK5	Uncharacterized protein	505	82985	Gammaproteobacteria	Pragia fontium	PF00691	IPR006664|IPR006665
A0A0G3CRH4	Membrane protein	358	82985	Gammaproteobacteria	Pragia fontium	PF00691|PF01389	IPR000498|IPR006664|IPR006665
A0A0G3CXC2	Uncharacterized protein	505	82985	Gammaproteobacteria	Pragia fontium	PF00691	IPR006664|IPR006665
A0A0G3EME3	Uncharacterized protein	218	445709	Betaproteobacteria	Pandoraea thiooxydans	PF00691|PF13441	IPR006664|IPR006665|IPR027367
A0A0G3ERI8	Flagellar motor protein MotB	316	445709	Betaproteobacteria	Pandoraea thiooxydans	PF00691|PF13677	IPR006665|IPR025713
A0A0G3ERN9	Uncharacterized protein	222	445709	Betaproteobacteria	Pandoraea thiooxydans	PF00691	IPR006664|IPR006665
A0A0G3ETI3	Uncharacterized protein	215	445709	Betaproteobacteria	Pandoraea thiooxydans	PF00691	IPR006665
A0A0G3EVS4	Peptidoglycan-associated protein	167	445709	Betaproteobacteria	Pandoraea thiooxydans	PF00691	IPR006664|IPR006665|IPR014169
A0A0G3EWN6	Peptidoglycan-associated protein	179	445709	Betaproteobacteria	Pandoraea thiooxydans	PF00691	IPR006664|IPR006665|IPR014169
A0A0G3I3Y4	OmpA/MotB	194	1277257	Alphaproteobacteria	Candidatus Liberibacter africanus PTSAPSY	PF00691	IPR006664|IPR006665
A0A0G3I501	OmpA/MotB	160	1277257	Alphaproteobacteria	Candidatus Liberibacter africanus PTSAPSY	PF00691	IPR006664|IPR006665
A0A0G3I9A8	Flagellar motor protein MotB	340	1277257	Alphaproteobacteria	Candidatus Liberibacter africanus PTSAPSY	PF00691|PF13677	IPR006665|IPR025713
A0A0G3X3U9	OmpA/MotB	278	543877	Alphaproteobacteria	Altererythrobacter marensis	PF00691|PF13677	IPR006665|IPR025713
A0A0G3X8Q5	OmpA/MotB domain protein	275	543877	Alphaproteobacteria	Altererythrobacter marensis	PF00691|PF04355	IPR006664|IPR006665|IPR007450
A0A0G3X9C7	Flagellar motor protein MotB	352	543877	Alphaproteobacteria	Altererythrobacter marensis	PF00691|PF13505	IPR006664|IPR006665|IPR027385
A0A0G3X9J5	OmpA family protein	229	543877	Alphaproteobacteria	Altererythrobacter marensis	PF00691|PF13488	IPR006664|IPR006665|IPR039567
A0A0G3XAF7	Outer membrane protein	191	543877	Alphaproteobacteria	Altererythrobacter marensis	PF00691	IPR006664|IPR006665
A0A0G3XB01	Peptidoglycan-associated protein	170	543877	Alphaproteobacteria	Altererythrobacter marensis	PF00691	IPR006664|IPR006665|IPR014169
A0A0G3XB14	OmpA family protein	292	543877	Alphaproteobacteria	Altererythrobacter marensis	PF00691	IPR006664|IPR006665
A0A0G3XB83	Putative outer membrane lipoprotein	246	543877	Alphaproteobacteria	Altererythrobacter marensis	PF00691	IPR006664|IPR006665
A0A0G3XC59	OmpA/MotB domain protein	275	543877	Alphaproteobacteria	Altererythrobacter marensis	PF00691|PF04355	IPR006664|IPR006665|IPR007450
A0A0G3XCL4	Membrane protein	228	1348774	Alphaproteobacteria	Croceicoccus naphthovorans	PF00691|PF13488	IPR006664|IPR006665|IPR039567
A0A0G3XDR8	Uncharacterized protein	252	1348774	Alphaproteobacteria	Croceicoccus naphthovorans	PF00691	IPR006664|IPR006665
A0A0G3XF58	Flagellar motor protein MotB	354	1348774	Alphaproteobacteria	Croceicoccus naphthovorans	PF00691|PF13505	IPR006664|IPR006665|IPR027385
A0A0G3XIF5	OmpA family protein	290	1348774	Alphaproteobacteria	Croceicoccus naphthovorans	PF00691	IPR006664|IPR006665
A0A0G3XKW8	OmpA family protein	294	1348774	Alphaproteobacteria	Croceicoccus naphthovorans	PF00691	IPR006664|IPR006665
A0A0G3XLT3	Flagellar motor protein MotB	373	1348774	Alphaproteobacteria	Croceicoccus naphthovorans	PF00691|PF13505	IPR006664|IPR006665|IPR027385
A0A0G3XLW8	Uncharacterized protein	157	1348774	Alphaproteobacteria	Croceicoccus naphthovorans	PF00691	IPR006664|IPR006665
A0A0G3XME7	Peptidoglycan-associated protein	165	1348774	Alphaproteobacteria	Croceicoccus naphthovorans	PF00691	IPR006664|IPR006665|IPR014169
A0A0G4JP42	Peptidoglycan-associated protein	169	1109412	Gammaproteobacteria	Brenneria goodwinii	PF00691	IPR006664|IPR006665|IPR014169
A0A0G4JXX1	Integral membrane protein YfiB	148	1109412	Gammaproteobacteria	Brenneria goodwinii	PF00691	IPR006664|IPR006665
A0A0G4JYS1	Outer membrane protein	540	1109412	Gammaproteobacteria	Brenneria goodwinii	PF00691	IPR006664|IPR006665
A0A0G4JYZ1	Outer membrane protein A	358	1109412	Gammaproteobacteria	Brenneria goodwinii	PF00691|PF01389	IPR000498|IPR006664|IPR006665
A0A0G4K266	Flagellar motor protein MotB	349	1109412	Gammaproteobacteria	Brenneria goodwinii	PF00691|PF13677	IPR006665|IPR025713
A0A0H2LPR1	Motility protein B	320	34073	Betaproteobacteria	Variovorax paradoxus	PF00691|PF13677	IPR006665|IPR025713
A0A0H2LXS6	Outer membrane protein A	277	34073	Betaproteobacteria	Variovorax paradoxus	PF00691|PF04355	IPR006665|IPR007450
A0A0H2LY20	Putative lipoprotein YiaD	187	34073	Betaproteobacteria	Variovorax paradoxus	PF00691	IPR006664|IPR006665
A0A0H2LY22	Outer membrane porin F	218	34073	Betaproteobacteria	Variovorax paradoxus	PF00691	IPR006664|IPR006665
A0A0H2LZE4	Peptidoglycan-associated protein	172	34073	Betaproteobacteria	Variovorax paradoxus	PF00691	IPR006664|IPR006665|IPR014169
A0A0H2M049	Outer membrane protein A	183	34073	Betaproteobacteria	Variovorax paradoxus	PF00691	IPR006665
A0A0H2M052	Putative outer membrane lipoprotein	401	34073	Betaproteobacteria	Variovorax paradoxus	PF00691	IPR006664|IPR006665
A0A0H2M4Z5	Putative lipoprotein YiaD	443	34073	Betaproteobacteria	Variovorax paradoxus	PF00691|PF09850	IPR006665|IPR017732|IPR017733
A0A0H2M598	Motility protein B	458	34073	Betaproteobacteria	Variovorax paradoxus	PF00691|PF09850	IPR006665|IPR017732|IPR017733
A0A0H2M7E3	K(+)-insensitive pyrophosphate-energized proton pump	848	34073	Betaproteobacteria	Variovorax paradoxus	PF00691|PF03030	IPR006665
A0A0H2MCH7	Putative lipoprotein YiaD	219	34073	Betaproteobacteria	Variovorax paradoxus	PF00691|PF13488	IPR006664|IPR006665|IPR039567
A0A0H2MCZ8	Peptidoglycan-associated protein	167	34073	Betaproteobacteria	Variovorax paradoxus	PF00691	IPR006664|IPR006665|IPR014169
A0A0H2ML02	Outer membrane protein	205	34073	Betaproteobacteria	Variovorax paradoxus	PF00691	IPR006664|IPR006665
A0A0H2MPD3	Putative lipoprotein YiaD	218	34073	Betaproteobacteria	Variovorax paradoxus	PF00691	IPR006665
A0A0H4KNP7	Outer membrane protein	231	988812	Alphaproteobacteria	Marinovum algicola DG 898	PF00691	IPR006664|IPR006665
A0A0H4KQV9	Outer membrane protein	634	988812	Alphaproteobacteria	Marinovum algicola DG 898	PF00691|PF04972	IPR006664|IPR006665|IPR007055
A0A0H4KT65	Flagellar motor protein MotB	880	988812	Alphaproteobacteria	Marinovum algicola DG 898	PF00691	IPR006665
A0A0H4KWA6	Outer membrane protein	216	988812	Alphaproteobacteria	Marinovum algicola DG 898	PF00691|PF13488	IPR006664|IPR006665|IPR039567
A0A0H4KWJ2	Outer membrane protein	304	988812	Alphaproteobacteria	Marinovum algicola DG 898	PF00691	IPR006664|IPR006665
A0A0H4KX06	Outer membrane protein	249	988812	Alphaproteobacteria	Marinovum algicola DG 898	PF00691	IPR006665
A0A0H4KY27	Outer membrane protein	647	988812	Alphaproteobacteria	Marinovum algicola DG 898	PF00691	IPR006665
A0A0H4L4N6	Peptidoglycan-associated protein	174	988812	Alphaproteobacteria	Marinovum algicola DG 898	PF00691	IPR006664|IPR006665|IPR014169
A0A0H4L4S2	Flagellar motor protein MotB	327	988812	Alphaproteobacteria	Marinovum algicola DG 898	PF00691|PF13677	IPR006665|IPR025713
A0A0H4LDB4	ABC-type phosphate transport system| periplasmic component	521	988812	Alphaproteobacteria	Marinovum algicola DG 898	PF00691|PF12849	IPR006665|IPR024370
A0A0H4VZS3	Flagellar motor protein MotB	314	103855	Betaproteobacteria	Bordetella hinzii	PF00691|PF13677	IPR006665|IPR025713
A0A0H4W5B3	Peptidoglycan-associated protein	164	103855	Betaproteobacteria	Bordetella hinzii	PF00691	IPR006664|IPR006665|IPR014169
A0A0H4W8C5	Outer membrane protein	216	103855	Betaproteobacteria	Bordetella hinzii	PF00691|PF13441	IPR006664|IPR006665|IPR027367
A0A0H4WNY6	Outer membrane protein	218	103855	Betaproteobacteria	Bordetella hinzii	PF00691	IPR006665
A0A0H4X0P1	Outer membrane protein A	193	103855	Betaproteobacteria	Bordetella hinzii	PF00691	IPR006664|IPR006665
A0A0H5B7C3	Chemotaxis protein MotB	273	1079	Alphaproteobacteria	Blastochloris viridis	PF00691|PF13677	IPR006665|IPR025713
A0A0H5BP34	Flagellar motor rotation protein MotB	333	1079	Alphaproteobacteria	Blastochloris viridis	PF00691	IPR006665
A0A0H5BPM4	Peptidoglycan-associated protein	171	1079	Alphaproteobacteria	Blastochloris viridis	PF00691	IPR006664|IPR006665|IPR014169
A0A0J0YPW0	Cell envelope biogenesis protein OmpA	299	1470200	Betaproteobacteria	Neisseria arctica	PF00691	IPR006664|IPR006665
A0A0J0YQU0	Membrane protein	246	1470200	Betaproteobacteria	Neisseria arctica	PF00691	IPR006664|IPR006665
A0A0J0YRG2	Cytochrome C oxidase subunit II	195	1470200	Betaproteobacteria	Neisseria arctica	PF00691	IPR006665
A0A0J0YS34	Membrane protein	272	1470200	Betaproteobacteria	Neisseria arctica	PF00691|PF04355	IPR006664|IPR006665|IPR007450
A0A0J0YUQ1	Membrane protein	223	1470200	Betaproteobacteria	Neisseria arctica	PF00691|PF05433	IPR006664|IPR006665|IPR008816
A0A0J1C3S9	Uncharacterized protein	390	1470200	Betaproteobacteria	Neisseria arctica	PF00691|PF06078	IPR006665
A0A0J1GG97	Uncharacterized protein	204	754436	Gammaproteobacteria	Photobacterium aphoticum	PF00691	IPR006664|IPR006665
A0A0J1GIW4	Flagellar protein MotY	294	754436	Gammaproteobacteria	Photobacterium aphoticum	PF00691|PF18393	IPR006664|IPR006665|IPR041544
A0A0J1GJY4	Cell envelope biogenesis protein OmpA	253	754436	Gammaproteobacteria	Photobacterium aphoticum	PF00691	IPR006664|IPR006665
A0A0J1GKB2	Peptidoglycan-associated protein	176	754436	Gammaproteobacteria	Photobacterium aphoticum	PF00691	IPR006664|IPR006665|IPR014169
A0A0J1GLI7	Histidine kinase	332	754436	Gammaproteobacteria	Photobacterium aphoticum	PF00691|PF13677	IPR006665|IPR025713
A0A0J1GLL0	Uncharacterized protein	236	754436	Gammaproteobacteria	Photobacterium aphoticum	PF00691|PF18393	IPR006665|IPR041544
A0A0J1GMD7	Uncharacterized protein	183	754436	Gammaproteobacteria	Photobacterium aphoticum	PF00691	IPR006664|IPR006665
A0A0J1GN97	Membrane protein	190	754436	Gammaproteobacteria	Photobacterium aphoticum	PF00691	IPR006664|IPR006665
A0A0J1GRM9	Membrane protein	197	754436	Gammaproteobacteria	Photobacterium aphoticum	PF00691	IPR006664|IPR006665
A0A0J1GS61	Type IV secretion protein DotU	432	754436	Gammaproteobacteria	Photobacterium aphoticum	PF00691|PF09850	IPR006665|IPR017732|IPR017733
A0A0J1GT61	Membrane protein	214	754436	Gammaproteobacteria	Photobacterium aphoticum	PF00691|PF13488	IPR006664|IPR006665|IPR039567
A0A0J5G5E0	Uncharacterized protein	161	1526735	Betaproteobacteria	Vogesella sp. EB	PF00691	IPR006665
A0A0J5GD20	Membrane protein	216	1526735	Betaproteobacteria	Vogesella sp. EB	PF00691	IPR006664|IPR006665
A0A0J5GD39	Agglutination protein	602	1526735	Betaproteobacteria	Vogesella sp. EB	PF00691|PF02321	IPR006664|IPR006665
A0A0J5GES6	Uncharacterized protein	350	1526735	Betaproteobacteria	Vogesella sp. EB	PF00691|PF01389	IPR000498|IPR006664|IPR006665
A0A0J5GF50	Uncharacterized protein	170	1526735	Betaproteobacteria	Vogesella sp. EB	PF00691	IPR006664|IPR006665
A0A0J5GF53	Membrane protein	212	1526735	Betaproteobacteria	Vogesella sp. EB	PF00691	IPR006664|IPR006665
A0A0J5GFL6	Flagellar motor protein MotD	270	1526735	Betaproteobacteria	Vogesella sp. EB	PF00691|PF13677	IPR006665|IPR025713
A0A0J5GGD2	Histidine kinase	329	1526735	Betaproteobacteria	Vogesella sp. EB	PF00691|PF13677	IPR006665|IPR025713
A0A0J5GHD8	Peptidoglycan-associated protein	187	1526735	Betaproteobacteria	Vogesella sp. EB	PF00691	IPR006664|IPR006665
A0A0J5JER9	Flagellar motor protein MotB	298	1526735	Betaproteobacteria	Vogesella sp. EB	PF00691|PF13677	IPR006665|IPR025713
A0A0J5Q8D4	Type IV / VI secretion system protein| DotU family	446	1618204	Alphaproteobacteria	Puniceibacterium sp. IMCC21224	PF00691|PF09850	IPR006665|IPR017732
A0A0J5Q8M3	Outer membrane protein/peptidoglycan-associated (Lipo)protein	218	1618204	Alphaproteobacteria	Puniceibacterium sp. IMCC21224	PF00691	IPR006664|IPR006665
A0A0J5Q911	Outer membrane protein/peptidoglycan-associated (Lipo)protein	327	1618204	Alphaproteobacteria	Puniceibacterium sp. IMCC21224	PF00691	IPR006664|IPR006665
A0A0J5QD28	Outer membrane protein/peptidoglycan-associated (Lipo)protein	222	1618204	Alphaproteobacteria	Puniceibacterium sp. IMCC21224	PF00691|PF13488	IPR006664|IPR006665|IPR039567
A0A0J5QIH0	Outer membrane protein/peptidoglycan-associated (Lipo)protein	637	1618204	Alphaproteobacteria	Puniceibacterium sp. IMCC21224	PF00691	IPR006664|IPR006665
A0A0J5QIX4	OmpA family	177	1618204	Alphaproteobacteria	Puniceibacterium sp. IMCC21224	PF00691	IPR006664|IPR006665
A0A0J5QJQ1	Peptidoglycan-associated protein	176	1618204	Alphaproteobacteria	Puniceibacterium sp. IMCC21224	PF00691	IPR006664|IPR006665|IPR014169
A0A0J5QP13	OmpA family	203	1618204	Alphaproteobacteria	Puniceibacterium sp. IMCC21224	PF00691	IPR006665
A0A0J5T7L8	Phosphate ABC transporter substrate-binding protein| PhoT family	519	1618204	Alphaproteobacteria	Puniceibacterium sp. IMCC21224	PF00691|PF12849	IPR006665|IPR024370
A0A0J5TAX7	Outer membrane protein/peptidoglycan-associated (Lipo)protein	356	1618204	Alphaproteobacteria	Puniceibacterium sp. IMCC21224	PF00691|PF04264	IPR006664|IPR006665|IPR007372
A0A0J5TE26	Outer membrane protein/peptidoglycan-associated (Lipo)protein	227	1618204	Alphaproteobacteria	Puniceibacterium sp. IMCC21224	PF00691	IPR006664|IPR006665
A0A0J5TFI8	Flagellar motor protein	725	1618204	Alphaproteobacteria	Puniceibacterium sp. IMCC21224	PF00691	IPR006665
A0A0J6ND89	Uncharacterized protein	472	1628212	Betaproteobacteria	Chromobacterium sp. LK11	PF00691|PF09850	IPR006665|IPR017732
A0A0J6NEV7	Flagellar motor protein MotB	309	1628212	Betaproteobacteria	Chromobacterium sp. LK11	PF00691|PF13677	IPR006665|IPR025713
A0A0J6NFI7	Flagellar motor protein MotD	278	1628212	Betaproteobacteria	Chromobacterium sp. LK11	PF00691|PF13677	IPR006665|IPR025713
A0A0J6NG76	Peptidoglycan-associated protein	175	1628212	Betaproteobacteria	Chromobacterium sp. LK11	PF00691	IPR006664|IPR006665|IPR014169
A0A0J6NGD0	Membrane protein	222	1628212	Betaproteobacteria	Chromobacterium sp. LK11	PF00691|PF13488	IPR006664|IPR006665|IPR039567
A0A0J6NHL5	Histidine kinase	327	1628212	Betaproteobacteria	Chromobacterium sp. LK11	PF00691|PF13677	IPR006665|IPR025713
A0A0J6NQC8	Membrane protein	224	1628212	Betaproteobacteria	Chromobacterium sp. LK11	PF00691	IPR006664|IPR006665
A0A0J6R9N1	Membrane protein	219	1628212	Betaproteobacteria	Chromobacterium sp. LK11	PF00691|PF05433	IPR006664|IPR006665|IPR008816
A0A0J6SFH4	Membrane protein	426	1187852	Alphaproteobacteria	Methylobacterium tarhaniae	PF00691|PF13677	IPR006665|IPR025713
A0A0J6T1Q5	Uncharacterized protein	337	1187852	Alphaproteobacteria	Methylobacterium tarhaniae	PF00691	IPR006665
A0A0J6T5L5	Uncharacterized protein	711	1187852	Alphaproteobacteria	Methylobacterium tarhaniae	PF00691	IPR006665
A0A0J6T666	Membrane protein	277	1187852	Alphaproteobacteria	Methylobacterium tarhaniae	PF00691|PF13677	IPR006665|IPR025713
A0A0J6TDT5	Peptidoglycan-associated protein	178	1187852	Alphaproteobacteria	Methylobacterium tarhaniae	PF00691	IPR006664|IPR006665|IPR014169
A0A0J8GM85	Uncharacterized protein	338	1513271	Gammaproteobacteria	Catenovulum maritimum	PF00691	IPR006665
A0A0J8GSL5	Uncharacterized protein	386	1513271	Gammaproteobacteria	Catenovulum maritimum	PF00691|PF13505	IPR006664|IPR006665|IPR027385
A0A0J8GUN8	Flagellar motor protein MotB	308	1513271	Gammaproteobacteria	Catenovulum maritimum	PF00691|PF13677	IPR006665|IPR025713
A0A0J8GUR5	Uncharacterized protein	398	1513271	Gammaproteobacteria	Catenovulum maritimum	PF00691	IPR006665
A0A0J8GVT1	Membrane protein	289	1513271	Gammaproteobacteria	Catenovulum maritimum	PF00691|PF18393	IPR006664|IPR006665|IPR041544
A0A0J8GVV2	Uncharacterized protein	252	1513271	Gammaproteobacteria	Catenovulum maritimum	PF00691	IPR006664|IPR006665
A0A0J8GXI8	Peptidoglycan-associated protein	186	1513271	Gammaproteobacteria	Catenovulum maritimum	PF00691	IPR006664|IPR006665|IPR014169
A0A0J8YCI3	Uncharacterized protein	216	1628856	Gammaproteobacteria	bacteria symbiont BFo2 of Frankliniella occidental	PF00691	IPR006664|IPR006665
A0A0J8YD23	Uncharacterized protein	431	1628856	Gammaproteobacteria	bacteria symbiont BFo2 of Frankliniella occidental	PF00691|PF09850	IPR006665|IPR017732
A0A0J8YGJ9	Uncharacterized protein	130	1628856	Gammaproteobacteria	bacteria symbiont BFo2 of Frankliniella occidental	PF00691	IPR006664|IPR006665
A0A0J8YUH3	Flagellar motor protein MotB	314	1628856	Gammaproteobacteria	bacteria symbiont BFo2 of Frankliniella occidental	PF00691|PF13677	IPR006665|IPR025713
A0A0J8YVI9	Peptidoglycan-associated protein	176	1628856	Gammaproteobacteria	bacteria symbiont BFo2 of Frankliniella occidental	PF00691	IPR006664|IPR006665|IPR014169
A0A0J8YXC7	Uncharacterized protein	295	1628856	Gammaproteobacteria	bacteria symbiont BFo2 of Frankliniella occidental	PF00691|PF13677	IPR006665|IPR025713
A0A0J9BKM7	Uncharacterized protein	149	1628856	Gammaproteobacteria	bacteria symbiont BFo2 of Frankliniella occidental	PF00691	IPR006664|IPR006665
A0A0J9E0S3	Outer membrane lipoprotein omp16	662	1675527	Alphaproteobacteria	Candidatus Rhodobacter lobularis	PF00691	IPR006664|IPR006665|IPR007055
A0A0J9E7M4	Outer membrane protein	308	1675527	Alphaproteobacteria	Candidatus Rhodobacter lobularis	PF00691	IPR006664|IPR006665
A0A0J9EA57	Outer membrane lipoprotein| OmpA family	220	1675527	Alphaproteobacteria	Candidatus Rhodobacter lobularis	PF00691	IPR006664|IPR006665
A0A0J9ECN1	Peptidoglycan-associated protein	168	1675527	Alphaproteobacteria	Candidatus Rhodobacter lobularis	PF00691	IPR006664|IPR006665|IPR014169
A0A0J9ECU4	Outer membrane protein	220	1675527	Alphaproteobacteria	Candidatus Rhodobacter lobularis	PF00691|PF13488	IPR006664|IPR006665|IPR039567
A0A0J9GRG6	Flagellar motor rotation protein MotB	1145	1675527	Alphaproteobacteria	Candidatus Rhodobacter lobularis	PF00691	IPR006665
A0A0J9GSH2	OmpA family protein	188	1675527	Alphaproteobacteria	Candidatus Rhodobacter lobularis	PF00691	IPR006664|IPR006665
A0A0J9GZQ9	OmpA domain protein	519	1675527	Alphaproteobacteria	Candidatus Rhodobacter lobularis	PF00691|PF12849	IPR006665|IPR024370
A0A0K0TTZ9	Uncharacterized protein	219	1643450	Alphaproteobacteria	Devosia sp. H5989	PF00691	IPR006664|IPR006665
A0A0K0TXJ5	Ferric siderophore transport system| periplasmic binding protein TonB	763	1643450	Alphaproteobacteria	Devosia sp. H5989	PF00691	IPR006665
A0A0K0TYQ4	Peptidoglycan-associated protein	158	1643450	Alphaproteobacteria	Devosia sp. H5989	PF00691	IPR006664|IPR006665|IPR014169
A0A0K0TYT9	Chemotaxis protein MotB	305	1643450	Alphaproteobacteria	Devosia sp. H5989	PF00691|PF13677	IPR006665|IPR025713
A0A0K0TYZ3	Uncharacterized protein	340	1643450	Alphaproteobacteria	Devosia sp. H5989	PF00691	IPR006665
A0A0K0TYZ6	Membrane protein	286	1643450	Alphaproteobacteria	Devosia sp. H5989	PF00691|PF13677	IPR006665|IPR025713
A0A0K0TZT0	Outer membrane protein A	174	1643450	Alphaproteobacteria	Devosia sp. H5989	PF00691	IPR006664|IPR006665
A0A0K0XTF3	Peptidoglycan-associated protein	176	1579979	Gammaproteobacteria	Wenzhouxiangella marina	PF00691	IPR006664|IPR006665|IPR014169
A0A0K0XUY7	Outer membrane protein/peptidoglycan-associated (Lipo)protein	342	1579979	Gammaproteobacteria	Wenzhouxiangella marina	PF00691|PF13505	IPR006664|IPR006665|IPR027385
A0A0K0XUZ9	Inner membrane lipoprotein YiaD	187	1579979	Gammaproteobacteria	Wenzhouxiangella marina	PF00691	IPR006664|IPR006665
A0A0K0XV26	Uncharacterized protein	788	1579979	Gammaproteobacteria	Wenzhouxiangella marina	PF00691|PF17963	IPR006664|IPR006665
A0A0K0XYF1	OmpA/MotB domain-containing protein	330	1579979	Gammaproteobacteria	Wenzhouxiangella marina	PF00691|PF14346	IPR006664|IPR006665|IPR025511
A0A0K0Y1B0	Outer membrane porin F	312	1458307	Alphaproteobacteria	Octadecabacter temperatus	PF00691	IPR006664|IPR006665
A0A0K0Y2Q1	Motility protein B	631	1458307	Alphaproteobacteria	Octadecabacter temperatus	PF00691	IPR006665
A0A0K0Y2V8	Peptidoglycan-associated protein	178	1458307	Alphaproteobacteria	Octadecabacter temperatus	PF00691	IPR006664|IPR006665|IPR014169
A0A0K0Y2X2	Outer membrane lipoprotein Omp16	223	1458307	Alphaproteobacteria	Octadecabacter temperatus	PF00691	IPR006664|IPR006665
A0A0K0Y7V4	Outer membrane porin F	189	1458307	Alphaproteobacteria	Octadecabacter temperatus	PF00691	IPR006665
A0A0K0Y8R7	Putative lipoprotein YiaD	219	1458307	Alphaproteobacteria	Octadecabacter temperatus	PF00691|PF13488	IPR006664|IPR006665|IPR039567
A0A0K0Y902	Outer membrane porin F	711	1458307	Alphaproteobacteria	Octadecabacter temperatus	PF00691	IPR006665
A0A0K0Y928	Putative lipoprotein YiaD	633	1458307	Alphaproteobacteria	Octadecabacter temperatus	PF00691	IPR006664|IPR006665
A0A0K0Y9T3	Uncharacterized protein	514	1458307	Alphaproteobacteria	Octadecabacter temperatus	PF00691	IPR006665
A0A0K1E5K3	Uncharacterized protein	282	52	Deltaproteobacteria	Chondromyces crocatus	PF00691	IPR006665
A0A0K1E6K1	Porin	575	52	Deltaproteobacteria	Chondromyces crocatus	PF00691|PF02412	IPR006664|IPR006665
A0A0K1E7B4	Porin	602	52	Deltaproteobacteria	Chondromyces crocatus	PF00691|PF02412	IPR006664|IPR006665
A0A0K1E8A6	Uncharacterized protein	178	52	Deltaproteobacteria	Chondromyces crocatus	PF00691	IPR006664|IPR006665
A0A0K1E994	Uncharacterized protein	312	52	Deltaproteobacteria	Chondromyces crocatus	PF00691	IPR006665
A0A0K1E9D0	Uncharacterized protein	569	52	Deltaproteobacteria	Chondromyces crocatus	PF00691	IPR006665
A0A0K1E9E1	Porin	634	52	Deltaproteobacteria	Chondromyces crocatus	PF00691|PF02412	IPR006664|IPR006665
A0A0K1EAQ6	OmpA-family exported protein	173	52	Deltaproteobacteria	Chondromyces crocatus	PF00691	IPR006664|IPR006665
A0A0K1EBV8	Uncharacterized protein	732	52	Deltaproteobacteria	Chondromyces crocatus	PF00691|PF13598	IPR006665|IPR037291
A0A0K1ED03	Uncharacterized protein	967	52	Deltaproteobacteria	Chondromyces crocatus	PF00691|PF13620	IPR006664|IPR006665
A0A0K1EI36	Porin	605	52	Deltaproteobacteria	Chondromyces crocatus	PF00691|PF02412	IPR006664|IPR006665
A0A0K1EJQ4	Uncharacterized protein	208	52	Deltaproteobacteria	Chondromyces crocatus	PF00691	IPR006664|IPR006665
A0A0K1EKE6	Uncharacterized protein	206	52	Deltaproteobacteria	Chondromyces crocatus	PF00691	IPR006664|IPR006665
A0A0K1ELJ8	Membrane protein	270	52	Deltaproteobacteria	Chondromyces crocatus	PF00691	IPR006665
A0A0K1EM24	Outer membrane protein	382	52	Deltaproteobacteria	Chondromyces crocatus	PF00691	IPR006664|IPR006665
A0A0K1EN02	Membrane protein	274	52	Deltaproteobacteria	Chondromyces crocatus	PF00691	IPR006665
A0A0K1EPC3	Uncharacterized protein	516	52	Deltaproteobacteria	Chondromyces crocatus	PF00691|PF02412	IPR006664|IPR006665
A0A0K1EQ70	Membrane protein	278	52	Deltaproteobacteria	Chondromyces crocatus	PF00691	IPR006665
A0A0K1EQB1	Uncharacterized protein	194	52	Deltaproteobacteria	Chondromyces crocatus	PF00691	IPR006664|IPR006665
A0A0K1EQC8	Uncharacterized protein	270	52	Deltaproteobacteria	Chondromyces crocatus	PF00691	IPR006664|IPR006665
A0A0K1ER31	Outer membrane protein	301	52	Deltaproteobacteria	Chondromyces crocatus	PF00691|PF14346	IPR006664|IPR006665|IPR025511
A0A0K1ERR3	OmpA-family exported protein	182	52	Deltaproteobacteria	Chondromyces crocatus	PF00691	IPR006664|IPR006665
A0A0K1ESK0	Porin	555	52	Deltaproteobacteria	Chondromyces crocatus	PF00691|PF02412	IPR006664|IPR006665
A0A0K1ET56	OmpA-like domain-containing protein	684	52	Deltaproteobacteria	Chondromyces crocatus	PF00691|PF02412	IPR006664|IPR006665
A0A0K1ET67	Porin	648	52	Deltaproteobacteria	Chondromyces crocatus	PF00691|PF02412	IPR006664|IPR006665
A0A0K1JTC9	Flagellar motor protein MotB	313	1678028	Betaproteobacteria	Massilia sp. NR 4-1	PF00691|PF13677	IPR006665|IPR025713
A0A0K1JXD8	Flagellar motor protein MotB	342	1678028	Betaproteobacteria	Massilia sp. NR 4-1	PF00691|PF13505	IPR006664|IPR006665|IPR027385
A0A0K1JXF6	Flagellar motor protein MotB	290	1678028	Betaproteobacteria	Massilia sp. NR 4-1	PF00691|PF14346	IPR006664|IPR006665|IPR025511
A0A0K1JXG1	Uncharacterized protein	228	1678028	Betaproteobacteria	Massilia sp. NR 4-1	PF00691|PF13488	IPR006664|IPR006665|IPR039567
A0A0K1JXP1	Peptidoglycan-associated protein	174	1678028	Betaproteobacteria	Massilia sp. NR 4-1	PF00691	IPR006664|IPR006665|IPR014169
A0A0K1JYP4	Uncharacterized protein	237	1678028	Betaproteobacteria	Massilia sp. NR 4-1	PF00691	IPR006664|IPR006665
A0A0K1K4G6	Flagellar motor protein MotD	260	1678028	Betaproteobacteria	Massilia sp. NR 4-1	PF00691|PF13677	IPR006665|IPR025713
A0A0K1K574	Cell envelope biogenesis protein OmpA	251	1678028	Betaproteobacteria	Massilia sp. NR 4-1	PF00691	IPR006664|IPR006665
A0A0K1K636	Histidine kinase	330	1678028	Betaproteobacteria	Massilia sp. NR 4-1	PF00691|PF13677	IPR006665|IPR025713
A0A0K1P8H8	Flagellar motor rotation protein MotB	267	1391653	Deltaproteobacteria	Vulgatibacter incomptus	PF00691	IPR006665
A0A0K1P9D7	Outer membrane protein	2854	1391653	Deltaproteobacteria	Vulgatibacter incomptus	PF00691|PF01345|PF09134	IPR001434|IPR006664|IPR006665|IPR015217
A0A0K1P9Q8	OmpA domain protein	520	1391653	Deltaproteobacteria	Vulgatibacter incomptus	PF00691|PF02412|PF13557	IPR006664|IPR006665
A0A0K1PDD1	OmpA family protein	340	1391653	Deltaproteobacteria	Vulgatibacter incomptus	PF00691	IPR006665
A0A0K1PEC8	Peptidoglycan-associated protein	256	1391653	Deltaproteobacteria	Vulgatibacter incomptus	PF00691	IPR006664|IPR006665
A0A0K1PEP3	Flagellar motor rotation protein MotB	246	1391653	Deltaproteobacteria	Vulgatibacter incomptus	PF00691	IPR006665
A0A0K1PGJ8	Flagellar motor rotation protein MotB	238	1391653	Deltaproteobacteria	Vulgatibacter incomptus	PF00691	IPR006665
A0A0K1PHK1	Flagellar motor rotation protein MotB	262	1391653	Deltaproteobacteria	Vulgatibacter incomptus	PF00691|PF13677	IPR006665|IPR025713
A0A0K1PKE3	Outer membrane protein A	290	1391654	Deltaproteobacteria	Labilithrix luteola	PF00691|PF14346	IPR006664|IPR006665|IPR025511
A0A0K1PLX5	Outer membrane protein OmpA	555	1391654	Deltaproteobacteria	Labilithrix luteola	PF00691|PF02412	IPR006664|IPR006665
A0A0K1PMA7	Flagellar motor rotation protein MotB	242	1391654	Deltaproteobacteria	Labilithrix luteola	PF00691|PF13677	IPR006665|IPR025713
A0A0K1PN34	Outer membrane protein	556	1391654	Deltaproteobacteria	Labilithrix luteola	PF00691|PF02412|PF13557	IPR006664|IPR006665
A0A0K1PNB6	Major porin and structural outer membrane porin OprF	355	1391654	Deltaproteobacteria	Labilithrix luteola	PF00691	IPR006664|IPR006665
A0A0K1PP19	OmpA family protein	265	1391654	Deltaproteobacteria	Labilithrix luteola	PF00691	IPR006665
A0A0K1PQZ0	Outer membrane fibronectin-binding protein	429	1391654	Deltaproteobacteria	Labilithrix luteola	PF00691|PF06078	IPR006664|IPR006665
A0A0K1PRV3	Flagellar motor rotation protein MotB	273	1391654	Deltaproteobacteria	Labilithrix luteola	PF00691	IPR006665
A0A0K1PT00	Outer membrane lipoprotein omp16	607	1391654	Deltaproteobacteria	Labilithrix luteola	PF00691|PF02412	IPR006665
A0A0K1PU07	Outer membrane protein	286	1391654	Deltaproteobacteria	Labilithrix luteola	PF00691|PF14346	IPR006664|IPR006665|IPR025511
A0A0K1PU78	18K peptidoglycan-associated outer membrane lipoprotein	182	1391654	Deltaproteobacteria	Labilithrix luteola	PF00691	IPR006664|IPR006665
A0A0K1PUL5	Flagellar motor rotation protein MotB	282	1391654	Deltaproteobacteria	Labilithrix luteola	PF00691	IPR006665
A0A0K1PXS4	Outer membrane protein A	268	1391654	Deltaproteobacteria	Labilithrix luteola	PF00691|PF14346	IPR006665|IPR025511
A0A0K1PYI9	Internalin| putative	641	1391654	Deltaproteobacteria	Labilithrix luteola	PF00691	IPR006664|IPR006665
A0A0K1PYK6	Flagellar motor rotation protein MotB	608	1391654	Deltaproteobacteria	Labilithrix luteola	PF00691|PF02412	IPR006664|IPR006665
A0A0K1PZN6	Major porin and structural outer membrane porin OprF	270	1391654	Deltaproteobacteria	Labilithrix luteola	PF00691	IPR006664|IPR006665
A0A0K1Q1F9	Outer membrane fibronectin-binding protein	164	1391654	Deltaproteobacteria	Labilithrix luteola	PF00691	IPR006665
A0A0K1Q1Y6	Outer membrane protein	756	1391654	Deltaproteobacteria	Labilithrix luteola	PF00691|PF13620	IPR006664|IPR006665
A0A0K1Q553	Outer membrane protein OmpA	577	1391654	Deltaproteobacteria	Labilithrix luteola	PF00691|PF02412	IPR006664|IPR006665
A0A0K1Q594	Flagellar motor rotation protein MotB	184	1391654	Deltaproteobacteria	Labilithrix luteola	PF00691	IPR006664|IPR006665
A0A0K1Q918	Outer membrane protein	249	1391654	Deltaproteobacteria	Labilithrix luteola	PF00691	IPR006664|IPR006665
A0A0K1Q983	Uncharacterized protein	739	1391654	Deltaproteobacteria	Labilithrix luteola	PF00691|PF13598	IPR006665|IPR037291
A0A0K1Q9S7	18K peptidoglycan-associated outer membrane lipoprotein	198	1391654	Deltaproteobacteria	Labilithrix luteola	PF00691	IPR006664|IPR006665
A0A0K1QEC0	Outer membrane protein OmpA	433	1391654	Deltaproteobacteria	Labilithrix luteola	PF00691|PF02412	IPR006664|IPR006665
A0A0K1QFX3	Outer membrane protein	361	1391654	Deltaproteobacteria	Labilithrix luteola	PF00691|PF02412	IPR006664|IPR006665
A0A0K1QGY9	Outer membrane lipoprotein omp16	290	1391654	Deltaproteobacteria	Labilithrix luteola	PF00691|PF14346	IPR006664|IPR006665|IPR025511
A0A0K1QH84	Flagellar motor rotation protein MotB	487	1391654	Deltaproteobacteria	Labilithrix luteola	PF00691|PF13557	IPR006664|IPR006665
A0A0K1XB43	Uncharacterized protein	207	1697053	Gammaproteobacteria	Oblitimonas alkaliphila	PF00691	IPR006665
A0A0K1XCC6	Uncharacterized protein	261	1697053	Gammaproteobacteria	Oblitimonas alkaliphila	PF00691|PF14346	IPR006664|IPR006665|IPR025511
A0A0K1XCE1	Cell envelope biogenesis protein OmpA	224	1697053	Gammaproteobacteria	Oblitimonas alkaliphila	PF00691|PF13488	IPR006664|IPR006665|IPR039567
A0A0K1XD56	Peptidoglycan-associated protein	170	1697053	Gammaproteobacteria	Oblitimonas alkaliphila	PF00691	IPR006664|IPR006665|IPR014169
A0A0K1XED9	Uncharacterized protein	291	1697053	Gammaproteobacteria	Oblitimonas alkaliphila	PF00691|PF04355	IPR006665|IPR007450
A0A0K1XGM3	Porin	353	1697053	Gammaproteobacteria	Oblitimonas alkaliphila	PF00691|PF05736	IPR006664|IPR006665|IPR008722
A0A0K2BJV6	Peptidoglycan-associated protein	183	186490	Gammaproteobacteria	Candidatus Baumannia cicadellinicola	PF00691	IPR006664|IPR006665|IPR014169
A0A0K2D9A4	Uncharacterized protein	343	1702325	Alphaproteobacteria	Chelatococcus sp. CO-6	PF00691	IPR006665
A0A0K2D9X9	Type IV secretion protein DotU	476	1702325	Alphaproteobacteria	Chelatococcus sp. CO-6	PF00691|PF09850	IPR006665|IPR017732|IPR017733
A0A0K2DA13	Uncharacterized protein	408	1702325	Alphaproteobacteria	Chelatococcus sp. CO-6	PF00691|PF13677	IPR006665|IPR025713
A0A0K2DAI4	Flagellar motor protein MotB	176	1702325	Alphaproteobacteria	Chelatococcus sp. CO-6	PF00691	IPR006664|IPR006665
A0A0K2DFD5	Uncharacterized protein	306	1702325	Alphaproteobacteria	Chelatococcus sp. CO-6	PF00691	IPR006665
A0A0K2DHR5	Peptidoglycan-associated protein	169	1702325	Alphaproteobacteria	Chelatococcus sp. CO-6	PF00691	IPR006664|IPR006665|IPR014169
A0A0K2DUU9	Protein OmpA	296	1238	Gammaproteobacteria	Piscirickettsia salmonis	PF00691|PF18393	IPR006665|IPR041544
A0A0K2DVY6	OmpA family protein	213	1238	Gammaproteobacteria	Piscirickettsia salmonis	PF00691	IPR006664|IPR006665
A0A0K2DY82	Membrane MotB of proton-channel complex MotA/MotB family protein	288	1238	Gammaproteobacteria	Piscirickettsia salmonis	PF00691|PF13677	IPR006665|IPR025713
A0A0K2E0W2	Outer membrane beta-barrel domain protein	326	1238	Gammaproteobacteria	Piscirickettsia salmonis	PF00691|PF13505	IPR006665|IPR027385
A0A0K6INH2	Peptidoglycan-associated protein	176	876478	Hydrogenophilalia	Tepidiphilus thermophilus	PF00691	IPR006664|IPR006665|IPR014169
A0A0K6IW87	Flagellar motor protein MotB	292	876478	Hydrogenophilalia	Tepidiphilus thermophilus	PF00691|PF13677	IPR006665|IPR025713
A0A0K6IWJ3	Flagellar motor protein MotB	357	876478	Hydrogenophilalia	Tepidiphilus thermophilus	PF00691|PF13677	IPR006665|IPR025713
A0A0K6IXI8	Outer membrane protein OmpA and related peptidoglycan-associated (Lipo)proteins	236	876478	Hydrogenophilalia	Tepidiphilus thermophilus	PF00691|PF13488	IPR006664|IPR006665|IPR039567
A0A0K6IXN1	Outer membrane protein OmpA and related peptidoglycan-associated (Lipo)proteins	237	876478	Hydrogenophilalia	Tepidiphilus thermophilus	PF00691	IPR006664|IPR006665
A0A0K6IXR3	OmpA family	118	876478	Hydrogenophilalia	Tepidiphilus thermophilus	PF00691	IPR006665
A0A0K8MCN5	Peptidoglycan-associated protein	164	1629334	Alphaproteobacteria	Caedimonas varicaedens	PF00691	IPR006664|IPR006665|IPR014169
A0A0K8MEP9	Putative lipoprotein YiaD	275	1629334	Alphaproteobacteria	Caedimonas varicaedens	PF00691	IPR006664|IPR006665
A0A0K8NTC6	Outer membrane protein A	232	1547922	Betaproteobacteria	Ideonella sakaiensis	PF00691	IPR006664|IPR006665
A0A0K8NY68	Outer membrane protein ImpK/VasF| OmpA/MotB domain	449	1547922	Betaproteobacteria	Ideonella sakaiensis	PF00691|PF09850	IPR006665|IPR017732|IPR017733
A0A0K8NZW2	Outer membrane porin F	212	1547922	Betaproteobacteria	Ideonella sakaiensis	PF00691	IPR006664|IPR006665
A0A0K8P0E2	Uncharacterized protein	418	1547922	Betaproteobacteria	Ideonella sakaiensis	PF00691	IPR006665
A0A0K8P0Z6	Uncharacterized protein	191	1547922	Betaproteobacteria	Ideonella sakaiensis	PF00691	IPR006664|IPR006665
A0A0K8P207	Peptidoglycan-associated protein	211	1547922	Betaproteobacteria	Ideonella sakaiensis	PF00691	IPR006664|IPR006665|IPR014169
A0A0K8P2L5	Outer membrane lipoprotein omp16	233	1547922	Betaproteobacteria	Ideonella sakaiensis	PF00691|PF13488	IPR006664|IPR006665|IPR039567
A0A0K8P4A6	Outer membrane protein	206	1547922	Betaproteobacteria	Ideonella sakaiensis	PF00691	IPR006664|IPR006665
A0A0K8P5P3	Flagellar motor rotation protein MotB	321	1547922	Betaproteobacteria	Ideonella sakaiensis	PF00691|PF13677	IPR006665|IPR025713
A0A0K8P777	OmpA family protein	320	1547922	Betaproteobacteria	Ideonella sakaiensis	PF00691|PF14346	IPR006664|IPR006665|IPR025511
A0A0K8P7V2	Chemotaxis motB protein	222	1547922	Betaproteobacteria	Ideonella sakaiensis	PF00691	IPR006665
A0A0K8P8E9	Conjugative transfer outer membrane protein	114	1547922	Betaproteobacteria	Ideonella sakaiensis	PF00691	IPR006665
A0A0K8P8I9	Uncharacterized protein	351	1547922	Betaproteobacteria	Ideonella sakaiensis	PF00691	IPR006664|IPR006665
A0A0K8P9E6	Cytochrome c oxidase polypeptide II	177	1547922	Betaproteobacteria	Ideonella sakaiensis	PF00691	IPR006665
A0A0K9I5Q2	Uncharacterized protein	260	1348163	Deltaproteobacteria	Desulfocarbo indianensis	PF00691|PF13677	IPR006665|IPR025713
A0A0K9I8L1	Uncharacterized protein	239	1348163	Deltaproteobacteria	Desulfocarbo indianensis	PF00691|PF13677	IPR006665|IPR025713
A0A0K9IBX3	Uncharacterized protein	404	1348163	Deltaproteobacteria	Desulfocarbo indianensis	PF00691	IPR006665
A0A0K9IC41	Uncharacterized protein	243	1348163	Deltaproteobacteria	Desulfocarbo indianensis	PF00691|PF13677	IPR006665|IPR025713
A0A0K9ICR2	Uncharacterized protein	262	1348163	Deltaproteobacteria	Desulfocarbo indianensis	PF00691|PF13677	IPR006665|IPR025713
A0A0K9ICX8	Peptidoglycan-associated protein	164	1348163	Deltaproteobacteria	Desulfocarbo indianensis	PF00691	IPR006664|IPR006665|IPR014169
A0A0K9JQ49	Cytochrome c oxidase subunit 2	527	242161	Betaproteobacteria	Candidatus Paraburkholderia calva	PF00116|PF00691|PF02790|PF13442	IPR002429|IPR006665|IPR009056|IPR011759|IPR014222
A0A0K9JRM5	Outer membrane protein| OmpA/MotB family	122	242161	Betaproteobacteria	Candidatus Paraburkholderia calva	PF00691	IPR006664|IPR006665
A0A0K9JSN4	Peptidoglycan-associated protein	168	242161	Betaproteobacteria	Candidatus Paraburkholderia calva	PF00691	IPR006664|IPR006665|IPR014169
A0A0K9JSU6	Outer membrane protein A	220	242161	Betaproteobacteria	Candidatus Paraburkholderia calva	PF00691	IPR006664|IPR006665
A0A0K9JV50	Flagellar motor rotation protein MotB	338	242161	Betaproteobacteria	Candidatus Paraburkholderia calva	PF00691|PF13677	IPR006665|IPR025713
A0A0K9JXF0	Cytochrome c oxidase polypeptide II	280	1090471	Betaproteobacteria	Candidatus Burkholderia humilis	PF00691|PF13442	IPR006665|IPR009056
A0A0K9JXV3	Outer membrane lipoprotein omp16	186	1090471	Betaproteobacteria	Candidatus Burkholderia humilis	PF00691	IPR006664|IPR006665
A0A0K9JY30	Outer membrane protein A	220	1090471	Betaproteobacteria	Candidatus Burkholderia humilis	PF00691	IPR006664|IPR006665
A0A0K9K017	Outer membrane protein	170	1090471	Betaproteobacteria	Candidatus Burkholderia humilis	PF00691	IPR006664|IPR006665
A0A0K9K0X1	Flagellar motor rotation protein MotB	323	1090471	Betaproteobacteria	Candidatus Burkholderia humilis	PF00691|PF13677	IPR006665|IPR025713
A0A0K9K1B6	Peptidoglycan-associated protein	168	1090471	Betaproteobacteria	Candidatus Burkholderia humilis	PF00691	IPR006664|IPR006665|IPR014169
A0A0L0IVX7	Uncharacterized protein	470	121719	Alphaproteobacteria	Pannonibacter phragmitetus	PF00691|PF13677	IPR006665|IPR025713
A0A0L0J2G2	Chemotaxis protein MotB	282	121719	Alphaproteobacteria	Pannonibacter phragmitetus	PF00691|PF13677	IPR006665|IPR025713
A0A0L0M4F0	Peptidoglycan-associated protein	168	242163	Betaproteobacteria	Candidatus Burkholderia verschuerenii	PF00691	IPR006664|IPR006665|IPR014169
A0A0L0MAW1	Outer membrane protein A	170	242163	Betaproteobacteria	Candidatus Burkholderia verschuerenii	PF00691	IPR006664|IPR006665
A0A0L0MC26	Outer membrane lipoprotein omp16	218	242163	Betaproteobacteria	Candidatus Burkholderia verschuerenii	PF00691|PF13441	IPR006664|IPR006665|IPR027367
A0A0L0MCX7	Outer membrane protein A	219	242163	Betaproteobacteria	Candidatus Burkholderia verschuerenii	PF00691	IPR006664|IPR006665
A0A0L0MEP0	OmpA domain protein	619	242163	Betaproteobacteria	Candidatus Burkholderia verschuerenii	PF00691	IPR006665
A0A0L0MEX5	Cytochrome c oxidase subunit 2	534	242163	Betaproteobacteria	Candidatus Burkholderia verschuerenii	PF00116|PF00691|PF02790|PF13442	IPR002429|IPR006665|IPR009056|IPR011759|IPR014222
A0A0L0MGB0	Flagellar motor rotation protein MotB	335	242163	Betaproteobacteria	Candidatus Burkholderia verschuerenii	PF00691|PF13677	IPR006665|IPR025713
A0A0L0MHM7	Flagellar motor rotation protein MotB	175	242163	Betaproteobacteria	Candidatus Burkholderia verschuerenii	PF00691	IPR006664|IPR006665
A0A0L0MIV5	Flagellar motor rotation protein MotB	350	242163	Betaproteobacteria	Candidatus Burkholderia verschuerenii	PF00691|PF13677	IPR006665|IPR025713
A0A0L0TMT0	Outer membrane lipoprotein omp16	218	1074049	Betaproteobacteria	Candidatus Burkholderia crenata	PF00691|PF13441	IPR006664|IPR006665|IPR027367
A0A0L0TN11	Outer membrane protein A	217	1074049	Betaproteobacteria	Candidatus Burkholderia crenata	PF00691	IPR006664|IPR006665
A0A0L0TNP6	Peptidoglycan-associated protein	168	1074049	Betaproteobacteria	Candidatus Burkholderia crenata	PF00691	IPR006664|IPR006665|IPR014169
A0A0L1JMG3	Uncharacterized protein	1056	1317121	Alphaproteobacteria	Pseudaestuariivita atlantica	PF00691	IPR006665
A0A0L1JNJ1	Cell envelope biogenesis protein OmpA	519	1317121	Alphaproteobacteria	Pseudaestuariivita atlantica	PF00691|PF12849	IPR006665|IPR024370
A0A0L1JNR5	Membrane protein	222	1317121	Alphaproteobacteria	Pseudaestuariivita atlantica	PF00691|PF13488	IPR006664|IPR006665|IPR039567
A0A0L1JRQ1	Cell envelope biogenesis protein OmpA	181	1317121	Alphaproteobacteria	Pseudaestuariivita atlantica	PF00691	IPR006664|IPR006665
A0A0L1JSF9	Membrane protein	625	1317121	Alphaproteobacteria	Pseudaestuariivita atlantica	PF00691	IPR006664|IPR006665
A0A0L1JSG2	Cell envelope biogenesis protein OmpA	310	1317121	Alphaproteobacteria	Pseudaestuariivita atlantica	PF00691	IPR006664|IPR006665
A0A0L1JSR8	Membrane protein	226	1317121	Alphaproteobacteria	Pseudaestuariivita atlantica	PF00691	IPR006664|IPR006665
A0A0L1JUH6	Peptidoglycan-associated protein	170	1317121	Alphaproteobacteria	Pseudaestuariivita atlantica	PF00691	IPR006664|IPR006665|IPR014169
A0A0L6CQT8	Outer membrane protein OmpA	219	74031	Alphaproteobacteria	Roseovarius tolerans	PF00691|PF13488	IPR006664|IPR006665|IPR039567
A0A0L6CRG0	Outer membrane lipoprotein Omp16	217	74031	Alphaproteobacteria	Roseovarius tolerans	PF00691	IPR006664|IPR006665
A0A0L6CSA2	Peptidoglycan-associated protein	176	74031	Alphaproteobacteria	Roseovarius tolerans	PF00691	IPR006664|IPR006665|IPR014169
A0A0L6CTP7	Outer membrane porin F	310	74031	Alphaproteobacteria	Roseovarius tolerans	PF00691	IPR006664|IPR006665
A0A0L6CUV5	Putative outer membrane lipoprotein	519	74031	Alphaproteobacteria	Roseovarius tolerans	PF00691|PF12849	IPR006665|IPR024370
A0A0L6CVZ8	Outer membrane porin F	638	74031	Alphaproteobacteria	Roseovarius tolerans	PF00691	IPR006664|IPR006665
A0A0L6CW05	Outer membrane porin F	192	74031	Alphaproteobacteria	Roseovarius tolerans	PF00691	IPR006665
A0A0L6CZL8	Motility protein B	652	74031	Alphaproteobacteria	Roseovarius tolerans	PF00691	IPR006665
A0A0L6T4I8	Flagellar motor protein MotB	331	1686064	Betaproteobacteria	Methylibium sp. NZG	PF00691|PF13677	IPR006665|IPR025713
A0A0L6T556	Uncharacterized protein	405	1686064	Betaproteobacteria	Methylibium sp. NZG	PF00691	IPR006665
A0A0L6T8G4	Uncharacterized protein	418	1686064	Betaproteobacteria	Methylibium sp. NZG	PF00691	IPR006665
A0A0L6T8L2	Uncharacterized protein	378	1686064	Betaproteobacteria	Methylibium sp. NZG	PF00691	IPR006664|IPR006665
A0A0L6T999	K(+)-insensitive pyrophosphate-energized proton pump	838	1686064	Betaproteobacteria	Methylibium sp. NZG	PF00691|PF03030	IPR006665
A0A0L6TAQ6	Membrane protein	222	1686064	Betaproteobacteria	Methylibium sp. NZG	PF00691|PF13488	IPR006664|IPR006665|IPR039567
A0A0L6TAV7	Peptidoglycan-associated protein	187	1686064	Betaproteobacteria	Methylibium sp. NZG	PF00691	IPR006664|IPR006665|IPR014169
A0A0L6TBZ7	Membrane protein	228	1686064	Betaproteobacteria	Methylibium sp. NZG	PF00691	IPR006664|IPR006665
A0A0L7SVW3	Uncharacterized protein	554	1560201	Gammaproteobacteria	Erwinia iniecta	PF00691	IPR006665
A0A0L7SWD6	Porin	173	1560201	Gammaproteobacteria	Erwinia iniecta	PF00691	IPR006664|IPR006665
A0A0L7SZ10	Membrane protein	219	1560201	Gammaproteobacteria	Erwinia iniecta	PF00691|PF13488	IPR006664|IPR006665|IPR039567
A0A0L7T0D4	Flagellar motor protein MotB	343	1560201	Gammaproteobacteria	Erwinia iniecta	PF00691|PF13677	IPR006665|IPR025713
A0A0L7T0I9	Membrane protein	355	1560201	Gammaproteobacteria	Erwinia iniecta	PF00691|PF01389	IPR000498|IPR006664|IPR006665
A0A0L7T2X6	Uncharacterized protein	413	1560201	Gammaproteobacteria	Erwinia iniecta	PF00691|PF09850	IPR006665|IPR017732|IPR017733
A0A0L7TC35	Peptidoglycan-associated protein	170	1560201	Gammaproteobacteria	Erwinia iniecta	PF00691	IPR006664|IPR006665|IPR014169
A0A0L7TFF7	Membrane protein	246	1560201	Gammaproteobacteria	Erwinia iniecta	PF00691|PF13677	IPR006665|IPR025713
A0A0L8EMG8	Uncharacterized protein	424	1688405	Betaproteobacteria	Achromobacter sp. DMS1	PF00691|PF09850	IPR006665|IPR017732|IPR017733
A0A0L8EP85	Uncharacterized protein	215	1688405	Betaproteobacteria	Achromobacter sp. DMS1	PF00691|PF13441	IPR006664|IPR006665|IPR027367
A0A0L8EPX7	Flagellar motor protein MotB	329	1688405	Betaproteobacteria	Achromobacter sp. DMS1	PF00691|PF13677	IPR006665|IPR025713
A0A0L8EU40	Uncharacterized protein	197	1688405	Betaproteobacteria	Achromobacter sp. DMS1	PF00691	IPR006664|IPR006665
A0A0L8EVC7	Peptidoglycan-associated protein	166	1688405	Betaproteobacteria	Achromobacter sp. DMS1	PF00691	IPR006664|IPR006665|IPR014169
A0A0M0HJ55	Flagellar protein MotY	293	693	Gammaproteobacteria	Vibrio nereis	PF00691|PF18393	IPR006665|IPR041544
A0A0M0HK85	Uncharacterized protein	325	693	Gammaproteobacteria	Vibrio nereis	PF00691|PF01389	IPR000498|IPR006664|IPR006665
A0A0M0HKB7	Uncharacterized protein	323	693	Gammaproteobacteria	Vibrio nereis	PF00691|PF01389	IPR000498|IPR006664|IPR006665
A0A0M0HNW5	Uncharacterized protein	206	693	Gammaproteobacteria	Vibrio nereis	PF00691	IPR006664|IPR006665
A0A0M0HPG1	Flagellar motor protein MotB	315	693	Gammaproteobacteria	Vibrio nereis	PF00691|PF13677	IPR006665|IPR025713
A0A0M0HR90	Uncharacterized protein	222	693	Gammaproteobacteria	Vibrio nereis	PF00691	IPR006664|IPR006665
A0A0M0HTC5	Peptidoglycan-associated protein	179	693	Gammaproteobacteria	Vibrio nereis	PF00691	IPR006664|IPR006665|IPR014169
A0A0M0HTH5	Uncharacterized protein	180	693	Gammaproteobacteria	Vibrio nereis	PF00691	IPR006664|IPR006665
A0A0M0HTW3	Uncharacterized protein	222	693	Gammaproteobacteria	Vibrio nereis	PF00691|PF13488	IPR006664|IPR006665|IPR039567
A0A0M0HUL7	Uncharacterized protein	203	693	Gammaproteobacteria	Vibrio nereis	PF00691	IPR006664|IPR006665
A0A0M1J2R1	Uncharacterized protein	116	1604836	Gammaproteobacteria	Achromatium sp. WMS3	PF00691	IPR006664|IPR006665
A0A0M1J450	Uncharacterized protein	63	1604836	Gammaproteobacteria	Achromatium sp. WMS3	PF00691	IPR006664|IPR006665
A0A0M1J4X7	Uncharacterized protein	152	1604835	Gammaproteobacteria	Achromatium sp. WMS2	PF00691	IPR006665
A0A0M1J887	Uncharacterized protein	127	1604836	Gammaproteobacteria	Achromatium sp. WMS3	PF00691	IPR006665
A0A0M1J9P6	Uncharacterized protein	238	1604834	Gammaproteobacteria	Achromatium sp. WMS1	PF00691	IPR006665
A0A0M1JA41	Uncharacterized protein	594	1604834	Gammaproteobacteria	Achromatium sp. WMS1	PF00691	IPR006665
A0A0M1JAN5	Uncharacterized protein	97	1604835	Gammaproteobacteria	Achromatium sp. WMS2	PF00691	IPR006665
A0A0M1JB22	Uncharacterized protein	217	1604835	Gammaproteobacteria	Achromatium sp. WMS2	PF00691	IPR006664|IPR006665
A0A0M1JBD6	Uncharacterized protein	321	1604835	Gammaproteobacteria	Achromatium sp. WMS2	PF00691	IPR006665
A0A0M1JF04	Uncharacterized protein	236	1604836	Gammaproteobacteria	Achromatium sp. WMS3	PF00691	IPR006665
A0A0M1JFF1	Uncharacterized protein	264	1604836	Gammaproteobacteria	Achromatium sp. WMS3	PF00691	IPR006665
A0A0M1JGA4	Uncharacterized protein	1004	1604836	Gammaproteobacteria	Achromatium sp. WMS3	PF00691|PF08238|PF12770|PF13374|PF13424	IPR006665|IPR013026|IPR024983
A0A0M1JGC8	Uncharacterized protein	238	1604836	Gammaproteobacteria	Achromatium sp. WMS3	PF00691	IPR006665
A0A0M1JH37	Uncharacterized protein	327	1604836	Gammaproteobacteria	Achromatium sp. WMS3	PF00691	IPR006664|IPR006665
A0A0M1JHY2	Uncharacterized protein	223	1604836	Gammaproteobacteria	Achromatium sp. WMS3	PF00691	IPR006665
A0A0M1JJ75	Uncharacterized protein	224	1604836	Gammaproteobacteria	Achromatium sp. WMS3	PF00691	IPR006665
A0A0M1JJG9	Uncharacterized protein	316	1604836	Gammaproteobacteria	Achromatium sp. WMS3	PF00691	IPR006664|IPR006665
A0A0M1JKD9	Uncharacterized protein	592	1604836	Gammaproteobacteria	Achromatium sp. WMS3	PF00691	IPR006665
A0A0M2LMP7	Membrane protein	228	1642949	Alphaproteobacteria	Sphingomonas sp. Ag1	PF00691|PF13488	IPR006664|IPR006665|IPR039567
A0A0M2LR34	Flagellar motor protein MotB	199	1642949	Alphaproteobacteria	Sphingomonas sp. Ag1	PF00691	IPR006664|IPR006665
A0A0M2LS14	Flagellar motor protein	301	1642949	Alphaproteobacteria	Sphingomonas sp. Ag1	PF00691|PF13677	IPR006665|IPR025713
A0A0M2LZA6	Flagellar motor protein MotB	136	1642949	Alphaproteobacteria	Sphingomonas sp. Ag1	PF00691	IPR006664|IPR006665
A0A0M2M1P1	Peptidoglycan-associated protein	172	1642949	Alphaproteobacteria	Sphingomonas sp. Ag1	PF00691	IPR006664|IPR006665|IPR014169
A0A0M2R1V1	Membrane protein	321	1549748	Alphaproteobacteria	Kiloniella litopenaei	PF00691|PF13677	IPR006665|IPR025713
A0A0M2R2P8	Uncharacterized protein	307	1549748	Alphaproteobacteria	Kiloniella litopenaei	PF00691	IPR006664|IPR006665
A0A0M2R333	Uncharacterized protein	512	1549748	Alphaproteobacteria	Kiloniella litopenaei	PF00691	IPR006665
A0A0M2R3R2	Peptidoglycan-associated protein	173	1549748	Alphaproteobacteria	Kiloniella litopenaei	PF00691	IPR006664|IPR006665|IPR014169
A0A0M2R6B5	Uncharacterized protein	285	1549748	Alphaproteobacteria	Kiloniella litopenaei	PF00691	IPR006664|IPR006665
A0A0M2R715	Uncharacterized protein	150	1549748	Alphaproteobacteria	Kiloniella litopenaei	PF00691	IPR006664|IPR006665
A0A0M2R8E7	Uncharacterized protein	440	1549748	Alphaproteobacteria	Kiloniella litopenaei	PF00691	IPR006665
A0A0M2R8Q0	Uncharacterized protein	346	1549748	Alphaproteobacteria	Kiloniella litopenaei	PF00691	IPR006665
A0A0M2RAM8	Uncharacterized protein	221	1549748	Alphaproteobacteria	Kiloniella litopenaei	PF00691|PF13677	IPR006665|IPR025713
A0A0M2RAN1	Uncharacterized protein	201	1549748	Alphaproteobacteria	Kiloniella litopenaei	PF00691	IPR006664|IPR006665
A0A0M2VAR0	Peptidoglycan-associated protein	172	1632859	Gammaproteobacteria	Arsukibacterium sp. MJ3	PF00691	IPR006664|IPR006665|IPR014169
A0A0M2VCI5	Uncharacterized protein	308	1632859	Gammaproteobacteria	Arsukibacterium sp. MJ3	PF00691|PF14346	IPR006664|IPR006665|IPR025511
A0A0M2VCV3	Membrane protein	210	1632859	Gammaproteobacteria	Arsukibacterium sp. MJ3	PF00691|PF13488	IPR006664|IPR006665|IPR039567
A0A0M2VGI9	Flagellar motor protein	321	1632859	Gammaproteobacteria	Arsukibacterium sp. MJ3	PF00691|PF13677	IPR006665|IPR025713
A0A0M2VIU4	Uncharacterized protein	622	1632859	Gammaproteobacteria	Arsukibacterium sp. MJ3	PF00691|PF02321	IPR006664|IPR006665
A0A0M2VKA7	Flagellar motor protein MotB	319	1632859	Gammaproteobacteria	Arsukibacterium sp. MJ3	PF00691|PF13677	IPR006665|IPR025713
A0A0M2VLX6	Membrane protein	286	1632859	Gammaproteobacteria	Arsukibacterium sp. MJ3	PF00691|PF18393	IPR006664|IPR006665|IPR041544
A0A0M2VMA0	Type IV secretion protein DotU	451	1632859	Gammaproteobacteria	Arsukibacterium sp. MJ3	PF00691|PF09850	IPR006665|IPR017732|IPR017733
A0A0M2VMM8	Membrane protein	357	1632859	Gammaproteobacteria	Arsukibacterium sp. MJ3	PF00691|PF13505	IPR006664|IPR006665|IPR027385
A0A0M2WET0	Motility protein B	261	1649647	Betaproteobacteria	Janthinobacterium sp. KBS0711	PF00691|PF13677	IPR006665|IPR025713
A0A0M2WJ13	Chemotaxis protein LafU	349	1649647	Betaproteobacteria	Janthinobacterium sp. KBS0711	PF00691|PF13677	IPR006665|IPR025713
A0A0M2WLY3	Putative lipoprotein YiaD	260	1649647	Betaproteobacteria	Janthinobacterium sp. KBS0711	PF00691	IPR006664|IPR006665
A0A0M2WN51	Motility protein B	325	1649647	Betaproteobacteria	Janthinobacterium sp. KBS0711	PF00691|PF13677	IPR006665|IPR025713
A0A0M2WN98	Outer membrane protein A	379	1649647	Betaproteobacteria	Janthinobacterium sp. KBS0711	PF00691|PF01389	IPR000498|IPR006664|IPR006665
A0A0M2WPN6	Peptidoglycan-associated protein	173	1649647	Betaproteobacteria	Janthinobacterium sp. KBS0711	PF00691	IPR006664|IPR006665|IPR014169
A0A0M2WQ09	Putative lipoprotein YiaD	227	1649647	Betaproteobacteria	Janthinobacterium sp. KBS0711	PF00691|PF13488	IPR006664|IPR006665|IPR039567
A0A0M2WQS9	Outer membrane porin F	236	1649647	Betaproteobacteria	Janthinobacterium sp. KBS0711	PF00691	IPR006664|IPR006665
A0A0M2WRR7	Peptidoglycan-binding protein ArfA	167	1649647	Betaproteobacteria	Janthinobacterium sp. KBS0711	PF00691	IPR006664|IPR006665
A0A0M2WUS1	Putative lipoprotein YiaD	299	1649647	Betaproteobacteria	Janthinobacterium sp. KBS0711	PF00691|PF14346	IPR006664|IPR006665|IPR025511
A0A0M2WW53	Outer membrane protein A	400	1649647	Betaproteobacteria	Janthinobacterium sp. KBS0711	None	IPR006664|IPR006665
A0A0M3QCV2	Peptidoglycan-associated lipoprotein	229	292913	Alphaproteobacteria	Sphingopyxis sp. 113P3	PF00691	IPR006664|IPR006665
A0A0M3QE94	Membrane protein	229	292913	Alphaproteobacteria	Sphingopyxis sp. 113P3	PF00691|PF13488	IPR006664|IPR006665|IPR039567
A0A0M3QFU4	Uncharacterized protein	476	1603606	Deltaproteobacteria	Desulfuromonas soudanensis	PF00691	IPR006664|IPR006665
A0A0M3QFY0	OmpA family membrane protein	73	1603606	Deltaproteobacteria	Desulfuromonas soudanensis	PF00691	IPR006665
A0A0M3QG30	Peptidoglycan-associated protein	163	1603606	Deltaproteobacteria	Desulfuromonas soudanensis	PF00691	IPR006664|IPR006665|IPR014169
A0A0M3QG42	Flagellar motor protein MotB	301	1603606	Deltaproteobacteria	Desulfuromonas soudanensis	PF00691	IPR006665
A0A0M3QGG0	Outer membrane protein OmpA/peptidoglycan-associated (Lipo)protein	351	1603606	Deltaproteobacteria	Desulfuromonas soudanensis	PF00691|PF13505	IPR006664|IPR006665|IPR027385|IPR030820
A0A0M3V2G3	Flagellar motor protein	259	199	Epsilonproteobacteria	Campylobacter concisus	PF00691|PF13677	IPR006665|IPR025713
A0A0M4CWD6	OmpA family protein	291	292913	Alphaproteobacteria	Sphingopyxis sp. 113P3	PF00691	IPR006664|IPR006665
A0A0M4CXT8	Uncharacterized protein	1808	1603606	Deltaproteobacteria	Desulfuromonas soudanensis	PF00691	IPR001434|IPR006665
A0A0M4CY90	Flagellar motor protein MotB	285	292913	Alphaproteobacteria	Sphingopyxis sp. 113P3	PF00691|PF13677	IPR006665|IPR025713
A0A0M4D3M5	Outer membrane protein OmpA/peptidoglycan-associated (Lipo)protein	392	1603606	Deltaproteobacteria	Desulfuromonas soudanensis	PF00691|PF02412|PF13505	IPR006664|IPR006665|IPR027385
A0A0M4D6Q1	Uncharacterized protein	161	1603606	Deltaproteobacteria	Desulfuromonas soudanensis	PF00691	IPR006664|IPR006665
A0A0M4D728	Flagellar motor protein MotB	372	292913	Alphaproteobacteria	Sphingopyxis sp. 113P3	PF00691|PF13505	IPR006664|IPR006665|IPR027385
A0A0M4D7D8	Outer membrane protein OmpA/peptidoglycan-associated (Lipo)protein	216	1603606	Deltaproteobacteria	Desulfuromonas soudanensis	PF00691|PF13488	IPR006664|IPR006665|IPR039567
A0A0M4D8S1	Outer membrane protein OmpA/peptidoglycan-associated (Lipo)protein	461	1603606	Deltaproteobacteria	Desulfuromonas soudanensis	PF00691|PF02412|PF13505	IPR006664|IPR006665|IPR027385
A0A0M4DBS7	Uncharacterized protein	315	292913	Alphaproteobacteria	Sphingopyxis sp. 113P3	PF00691	IPR006664|IPR006665
A0A0M4DEZ8	Flagellar motor protein MotB	1692	1603606	Deltaproteobacteria	Desulfuromonas soudanensis	PF00691	IPR006665
A0A0M4DFR8	Flagellar motor protein MotB	270	1603606	Deltaproteobacteria	Desulfuromonas soudanensis	PF00691	IPR006665
A0A0M4DKZ2	Peptidoglycan-associated protein	179	1603606	Deltaproteobacteria	Desulfuromonas soudanensis	PF00691	IPR006664|IPR006665|IPR014169
A0A0M4LSY7	Peptidoglycan-associated protein	170	361183	Alphaproteobacteria	Altererythrobacter epoxidivorans	PF00691	IPR006664|IPR006665|IPR014169
A0A0M4LWZ4	Outer membrane protein assembly factor YaeT	194	361183	Alphaproteobacteria	Altererythrobacter epoxidivorans	PF00691	IPR006665
A0A0M4M2M9	Flagellar motor protein MotB	282	1125411	Gammaproteobacteria	Candidatus Thioglobus singularis PS1	PF00691	IPR006664|IPR006665
A0A0M4M6L8	Outer membrane protein A	231	361183	Alphaproteobacteria	Altererythrobacter epoxidivorans	PF00691|PF05433	IPR006664|IPR006665|IPR008816
A0A0M4M6V2	Outer membrane protein	246	361183	Alphaproteobacteria	Altererythrobacter epoxidivorans	PF00691	IPR006664|IPR006665
A0A0M4M9D5	Outer membrane protein A	300	361183	Alphaproteobacteria	Altererythrobacter epoxidivorans	PF00691	IPR006664|IPR006665
A0A0M4MW08	Peptidoglycan-associated protein	371	361183	Alphaproteobacteria	Altererythrobacter epoxidivorans	PF00691	IPR006664|IPR006665
A0A0M4STK6	Peptidoglycan-associated protein	168	199	Epsilonproteobacteria	Campylobacter concisus	PF00691	IPR006664|IPR006665
A0A0M4TMQ1	Putative OmpA/MotB domain protein	363	199	Epsilonproteobacteria	Campylobacter concisus	PF00691	IPR006665
A0A0M5IJM5	OmpA/MotB protein	164	292913	Alphaproteobacteria	Sphingopyxis sp. 113P3	PF00691	IPR006664|IPR006665
A0A0M5IL59	Peptidoglycan-associated protein	170	292913	Alphaproteobacteria	Sphingopyxis sp. 113P3	PF00691	IPR006664|IPR006665|IPR014169
A0A0M5IYH1	Outer membrane protein OmpA/peptidoglycan-associated (Lipo)protein	321	1603606	Deltaproteobacteria	Desulfuromonas soudanensis	PF00691|PF14346	IPR006664|IPR006665|IPR025511
A0A0M5IZ55	Outer membrane protein OmpA/peptidoglycan-associated (Lipo)protein	729	1603606	Deltaproteobacteria	Desulfuromonas soudanensis	PF00691|PF13557	IPR006664|IPR006665
A0A0M5MIF4	Outer membrane fibronectin-binding protein	338	199	Epsilonproteobacteria	Campylobacter concisus	PF00691|PF13505	IPR006664|IPR006665|IPR027385
A0A0M6YG32	Outer membrane porin F	301	420998	Alphaproteobacteria	Jannaschia donghaensis	PF00691	IPR006664|IPR006665
A0A0M6YGG0	Flagellar motor protein MotD	694	420998	Alphaproteobacteria	Jannaschia donghaensis	PF00691	IPR006665
A0A0M6YHG3	Root adhesin	654	420998	Alphaproteobacteria	Jannaschia donghaensis	PF00691	IPR006665
A0A0M6YHU3	Peptidoglycan-associated protein	172	420998	Alphaproteobacteria	Jannaschia donghaensis	PF00691	IPR006664|IPR006665|IPR014169
A0A0M6YHY4	Minor outer membrane protein Omp16	214	420998	Alphaproteobacteria	Jannaschia donghaensis	PF00691	IPR006664|IPR006665
A0A0M6YKN4	Inner membrane lipoprotein YiaD	216	420998	Alphaproteobacteria	Jannaschia donghaensis	PF00691|PF13488	IPR006664|IPR006665|IPR039567
A0A0M6YNC7	Putative outer membrane lipoprotein	684	420998	Alphaproteobacteria	Jannaschia donghaensis	PF00691	IPR006665
A0A0M6Z7E5	Inner membrane lipoprotein YiaD	344	311410	Alphaproteobacteria	Labrenzia alba	PF00691	IPR006665
A0A0M6ZI81	Inner membrane lipoprotein YiaD	534	311410	Alphaproteobacteria	Labrenzia alba	PF00691|PF09850	IPR006665|IPR017732
A0A0M7A5V9	Chemotaxis protein MotB	284	311410	Alphaproteobacteria	Labrenzia alba	PF00691|PF13677	IPR006665|IPR025713
A0A0M7A681	Minor outer membrane protein Omp16	177	311410	Alphaproteobacteria	Labrenzia alba	PF00691	IPR006664|IPR006665
A0A0M7A6U8	Peptidoglycan-associated protein	161	311410	Alphaproteobacteria	Labrenzia alba	PF00691	IPR006664|IPR006665|IPR014169
A0A0M7A8Q9	Outer membrane protein ArfA	352	311410	Alphaproteobacteria	Labrenzia alba	PF00691|PF04264	IPR006664|IPR006665|IPR007372
A0A0M7ABP4	Outer membrane porin F	193	311410	Alphaproteobacteria	Labrenzia alba	PF00691	IPR006664|IPR006665
A0A0M7B128	Outer membrane porin F	239	311410	Alphaproteobacteria	Labrenzia alba	PF00691	IPR006664|IPR006665
A0A0M9DVR2	Secreted protein containing Outer membrane protein| OmpA/MotB	169	1509431	Deltaproteobacteria	Candidatus Magnetomorum sp. HK-1	PF00691	IPR006664|IPR006665
A0A0M9DWT9	OmpA/MotB domain-containing protein	417	1509431	Deltaproteobacteria	Candidatus Magnetomorum sp. HK-1	PF00691	IPR006664|IPR006665
A0A0M9DWY0	Parallel beta-helix repeat-containing protein	926	1509431	Deltaproteobacteria	Candidatus Magnetomorum sp. HK-1	PF00691	IPR006665
A0A0M9DX08	Protein containing DUF1566	420	1509431	Deltaproteobacteria	Candidatus Magnetomorum sp. HK-1	PF00691|PF07603	IPR006665
A0A0M9DX52	Secreted protein containing Outer membrane protein| OmpA/MotB	358	1509431	Deltaproteobacteria	Candidatus Magnetomorum sp. HK-1	PF00691	IPR006664|IPR006665
A0A0M9DXA7	Cell envelope biogenesis protein OmpA	215	1509431	Deltaproteobacteria	Candidatus Magnetomorum sp. HK-1	PF00691	IPR006664|IPR006665
A0A0M9DYK5	Secreted protein containing Outer membrane protein| OmpA/MotB	169	1509431	Deltaproteobacteria	Candidatus Magnetomorum sp. HK-1	PF00691	IPR006664|IPR006665
A0A0M9DZ67	Secreted protein containing Outer membrane protein| OmpA/MotB	373	1509431	Deltaproteobacteria	Candidatus Magnetomorum sp. HK-1	PF00691	IPR002035|IPR006664|IPR006665
A0A0M9E1E7	Flagellar motor protein MotB	377	1509431	Deltaproteobacteria	Candidatus Magnetomorum sp. HK-1	PF00691|PF13519	IPR002035|IPR006664|IPR006665
A0A0M9E379	Protein containing Outer membrane protein| OmpA/MotB	507	1509431	Deltaproteobacteria	Candidatus Magnetomorum sp. HK-1	PF00691	IPR006664|IPR006665
A0A0M9E385	Chemotaxis protein MotB	219	1509431	Deltaproteobacteria	Candidatus Magnetomorum sp. HK-1	PF00691|PF13677	IPR006665|IPR025713
A0A0M9E3V9	Flagellar motor protein MotB	591	1509431	Deltaproteobacteria	Candidatus Magnetomorum sp. HK-1	PF00691|PF02412	IPR002035|IPR006664|IPR006665
A0A0M9E3X3	Chemotaxis protein MotB	241	1509431	Deltaproteobacteria	Candidatus Magnetomorum sp. HK-1	PF00691|PF13677	IPR006665|IPR025713
A0A0M9E4J7	Cell wall associated biofilm protein	2296	1509431	Deltaproteobacteria	Candidatus Magnetomorum sp. HK-1	PF00691	IPR006664|IPR006665
A0A0M9E540	Cell envelope biogenesis protein OmpA	494	1509431	Deltaproteobacteria	Candidatus Magnetomorum sp. HK-1	PF00691|PF02412	IPR006664|IPR006665
A0A0M9E5X8	Protein containing Outer membrane protein| OmpA/MotB	75	1509431	Deltaproteobacteria	Candidatus Magnetomorum sp. HK-1	PF00691	IPR006665
A0A0M9E654	OmpA/MotB domain-containing protein	465	1509431	Deltaproteobacteria	Candidatus Magnetomorum sp. HK-1	PF00092|PF00691|PF02412	IPR002035|IPR006664|IPR006665
A0A0M9E772	Secreted protein containing Outer membrane protein| OmpA/MotB	322	1509431	Deltaproteobacteria	Candidatus Magnetomorum sp. HK-1	PF00691|PF13181	IPR006665|IPR013026
A0A0M9E9A5	Chemotaxis protein MotB	115	1509431	Deltaproteobacteria	Candidatus Magnetomorum sp. HK-1	PF00691	IPR006665
A0A0M9EBH9	Flagellar motor protein MotB	451	1509431	Deltaproteobacteria	Candidatus Magnetomorum sp. HK-1	PF00691|PF02412|PF13505	IPR006664|IPR006665|IPR027385
A0A0M9EBN3	Flagellar motor protein MotB	423	1509431	Deltaproteobacteria	Candidatus Magnetomorum sp. HK-1	PF00691|PF02412	IPR006664|IPR006665
A0A0M9EDP5	Chemotaxis protein MotB	247	1509431	Deltaproteobacteria	Candidatus Magnetomorum sp. HK-1	PF00691	IPR006665
A0A0M9EEF4	Putative lipoprotein YiaD	217	1389006	Alphaproteobacteria	Shimia sp. SK013	PF00691|PF13488	IPR006664|IPR006665|IPR039567
A0A0M9EEH3	Flagellar motor protein MotB	473	1509431	Deltaproteobacteria	Candidatus Magnetomorum sp. HK-1	PF00691|PF02412|PF13505	IPR006664|IPR006665|IPR027385
A0A0M9EEH5	Peptidoglycan-associated protein	166	1389006	Alphaproteobacteria	Shimia sp. SK013	PF00691	IPR006664|IPR006665|IPR014169
A0A0M9EF80	Outer membrane porin F	191	1389006	Alphaproteobacteria	Shimia sp. SK013	PF00691	IPR006665
A0A0M9EFR8	Peptidoglycan-binding protein ArfA	686	1389006	Alphaproteobacteria	Shimia sp. SK013	PF00691|PF04972	IPR006664|IPR006665|IPR007055
A0A0M9EFX7	Motility protein B	738	1389006	Alphaproteobacteria	Shimia sp. SK013	PF00691	IPR006665
A0A0M9EK76	Phosphate-binding protein PstS	519	1389006	Alphaproteobacteria	Shimia sp. SK013	PF00691|PF12849	IPR006665|IPR024370
A0A0M9GMS6	Cell envelope biogenesis protein OmpA	218	1514904	Alphaproteobacteria	Ahrensia marina	PF00691|PF13488	IPR006664|IPR006665|IPR039567
A0A0N0D0A2	OmpA/MotB domain containing protein	234	1509431	Deltaproteobacteria	Candidatus Magnetomorum sp. HK-1	PF00691|PF13441	IPR006664|IPR006665|IPR027367
A0A0N0D0H3	Protein containing Outer membrane protein| OmpA/MotB	1087	1509431	Deltaproteobacteria	Candidatus Magnetomorum sp. HK-1	PF00691|PF12245	IPR006664|IPR006665|IPR022038
A0A0N0D1M2	Flagellar motor protein MotB	636	1509431	Deltaproteobacteria	Candidatus Magnetomorum sp. HK-1	PF00691	IPR006665
A0A0N0D2T0	Serine/threonine protein kinase-related domain protein	850	1509431	Deltaproteobacteria	Candidatus Magnetomorum sp. HK-1	PF00069|PF00691|PF12849	IPR000719|IPR006665|IPR024370
A0A0N0D302	Flagellar motor protein MotB	234	1509431	Deltaproteobacteria	Candidatus Magnetomorum sp. HK-1	PF00691|PF13677	IPR006665|IPR025713
A0A0N0D387	Flagellar motor protein MotB	259	1509431	Deltaproteobacteria	Candidatus Magnetomorum sp. HK-1	PF00691	IPR006665
A0A0N0D4M4	Secreted protein containing Outer membrane protein| OmpA/MotB	168	1509431	Deltaproteobacteria	Candidatus Magnetomorum sp. HK-1	PF00691	IPR006664|IPR006665
A0A0N0D5L2	Peptidoglycan-associated protein	211	1509431	Deltaproteobacteria	Candidatus Magnetomorum sp. HK-1	PF00691	IPR006664|IPR006665|IPR014169
A0A0N0D713	Flagellar motor protein MotB	468	1509431	Deltaproteobacteria	Candidatus Magnetomorum sp. HK-1	PF00691|PF02412|PF13505	IPR006664|IPR006665|IPR027385
A0A0N0D736	Secreted protein containing Outer membrane protein| OmpA/MotB	1846	1509431	Deltaproteobacteria	Candidatus Magnetomorum sp. HK-1	PF00691|PF12245	IPR006664|IPR006665|IPR022038
A0A0N0D813	Motility protein B	272	1389006	Alphaproteobacteria	Shimia sp. SK013	PF00691|PF13677	IPR006665|IPR025713
A0A0N0D8K0	Putative lipoprotein YiaD	313	1389006	Alphaproteobacteria	Shimia sp. SK013	PF00691	IPR006664|IPR006665
A0A0N0D8M5	Outer membrane porin F	181	1389006	Alphaproteobacteria	Shimia sp. SK013	PF00691	IPR006664|IPR006665
A0A0N0D8P0	Outer membrane lipoprotein Omp16	217	1389006	Alphaproteobacteria	Shimia sp. SK013	PF00691	IPR006664|IPR006665
A0A0N0E7H3	Peptidoglycan-associated protein	173	1514904	Alphaproteobacteria	Ahrensia marina	PF00691	IPR006664|IPR006665|IPR014169
A0A0N0GLJ4	Outer membrane protein A	232	857265	Betaproteobacteria	Amantichitinum ursilacus	PF00691	IPR006664|IPR006665
A0A0N0GLX5	Uncharacterized protein	153	857265	Betaproteobacteria	Amantichitinum ursilacus	PF00691	IPR006665
A0A0N0GMZ1	Peptidoglycan-associated protein	177	857265	Betaproteobacteria	Amantichitinum ursilacus	PF00691	IPR006664|IPR006665|IPR014169
A0A0N0GR65	Outer membrane protein A	360	857265	Betaproteobacteria	Amantichitinum ursilacus	PF00691|PF13505	IPR006664|IPR006665|IPR027385
A0A0N0I9A5	Outer membrane protein A	356	1354267	Gammaproteobacteria	Moellerella wisconsensis ATCC 35017	PF00691|PF01389	IPR000498|IPR006664|IPR006665
A0A0N0J7D6	Uncharacterized protein	646	1523420	Alphaproteobacteria	Rhizobium sp. AAP43	PF00691	IPR000198|IPR006665
A0A0N0J8A4	Uncharacterized protein	434	1523424	Betaproteobacteria	beta proteobacterium AAP65	PF00691	IPR006664|IPR006665
A0A0N0J9J5	Cell envelope biogenesis protein OmpA	510	1523420	Alphaproteobacteria	Rhizobium sp. AAP43	PF00691|PF09850	IPR006665|IPR017732|IPR017733
A0A0N0JA65	Uncharacterized protein	343	1523420	Alphaproteobacteria	Rhizobium sp. AAP43	PF00691	IPR006665
A0A0N0JA84	Peptidoglycan-associated protein	179	1523420	Alphaproteobacteria	Rhizobium sp. AAP43	PF00691	IPR006664|IPR006665|IPR014169
A0A0N0JBV7	Uncharacterized protein	335	1523424	Betaproteobacteria	beta proteobacterium AAP65	PF00691|PF14346	IPR006664|IPR006665|IPR025511
A0A0N0JCC4	Uncharacterized protein	210	1523424	Betaproteobacteria	beta proteobacterium AAP65	PF00691	IPR006665
A0A0N0JDI5	Uncharacterized protein	445	1523424	Betaproteobacteria	beta proteobacterium AAP65	PF00691|PF09850	IPR006665|IPR017732|IPR017733
A0A0N0JEJ5	Uncharacterized protein	238	1523424	Betaproteobacteria	beta proteobacterium AAP65	PF00691	IPR006664|IPR006665
A0A0N0JEP1	Flagellar motor protein MotB	322	1523424	Betaproteobacteria	beta proteobacterium AAP65	PF00691|PF13677	IPR006665|IPR025713
A0A0N0JF43	Uncharacterized protein	109	1523424	Betaproteobacteria	beta proteobacterium AAP65	PF00691	IPR006664|IPR006665
A0A0N0JTC7	K(+)-insensitive pyrophosphate-energized proton pump	844	1523428	Betaproteobacteria	beta proteobacterium AAP99	PF00691|PF03030	IPR006665
A0A0N0JU10	Uncharacterized protein	435	1523428	Betaproteobacteria	beta proteobacterium AAP99	PF00691|PF09850	IPR006665|IPR017732|IPR017733
A0A0N0JWX2	Uncharacterized protein	367	1523428	Betaproteobacteria	beta proteobacterium AAP99	PF00691|PF13505	IPR006664|IPR006665|IPR027385
A0A0N0JZU6	Flagellar motor protein MotB	133	1523416	Alphaproteobacteria	Blastomonas sp. AAP25	PF00691	IPR006664|IPR006665
A0A0N0K018	Flagellar motor protein MotB	145	1523432	Alphaproteobacteria	alpha proteobacterium AAP81b	PF00691	IPR006664|IPR006665
A0A0N0K1U5	Peptidoglycan-associated protein	163	1523416	Alphaproteobacteria	Blastomonas sp. AAP25	PF00691	IPR006664|IPR006665|IPR014169
A0A0N0K3U7	Peptidoglycan-associated protein	183	1523422	Alphaproteobacteria	Brevundimonas sp. AAP58	PF00691	IPR006664|IPR006665|IPR014169
A0A0N0K3Z0	Uncharacterized protein	262	1523422	Alphaproteobacteria	Brevundimonas sp. AAP58	PF00691	IPR006664|IPR006665
A0A0N0K610	Uncharacterized protein	230	1523427	Alphaproteobacteria	Novosphingobium sp. AAP93	PF00691|PF13488	IPR006664|IPR006665|IPR039567
A0A0N0KD69	Flagellar motor protein MotB	361	1523425	Alphaproteobacteria	Novosphingobium sp. AAP83	PF00691|PF13505	IPR006664|IPR006665|IPR027385
A0A0N0KG53	Cell envelope biogenesis protein OmpA	289	1523425	Alphaproteobacteria	Novosphingobium sp. AAP83	PF00691	IPR006664|IPR006665
A0A0N0V3B8	Outer membrane protein A	202	1389006	Alphaproteobacteria	Shimia sp. SK013	PF00691	IPR006664|IPR006665
A0A0N0VL97	Uncharacterized protein	401	1514904	Alphaproteobacteria	Ahrensia marina	PF00691|PF13677	IPR006665|IPR025713
A0A0N0VLH6	Uncharacterized protein	343	1514904	Alphaproteobacteria	Ahrensia marina	PF00691	IPR006665
A0A0N0XJ26	Motility protein B	262	857265	Betaproteobacteria	Amantichitinum ursilacus	PF00691|PF13677	IPR006665|IPR025713
A0A0N0XMQ4	Putative lipoprotein YiaD	222	857265	Betaproteobacteria	Amantichitinum ursilacus	PF00691|PF13441	IPR006664|IPR006665|IPR027367
A0A0N0Z7N3	MotB family flagellar motor rotation protein	284	1354267	Gammaproteobacteria	Moellerella wisconsensis ATCC 35017	PF00691|PF13677	IPR006665|IPR025713
A0A0N0Z8N1	Uncharacterized protein	578	1354267	Gammaproteobacteria	Moellerella wisconsensis ATCC 35017	PF00691	IPR006664|IPR006665
A0A0N0Z9A9	Peptidoglycan-associated protein	166	1354267	Gammaproteobacteria	Moellerella wisconsensis ATCC 35017	PF00691	IPR006664|IPR006665|IPR014169
A0A0N1A4Q5	Flagellar motor protein MotB	449	1523420	Alphaproteobacteria	Rhizobium sp. AAP43	PF00691|PF13677	IPR006665|IPR025713
A0A0N1A4T8	Flagellar motor protein MotB	194	1523420	Alphaproteobacteria	Rhizobium sp. AAP43	PF00691	IPR006664|IPR006665
A0A0N1A9R7	Cell envelope biogenesis protein OmpA	221	1523420	Alphaproteobacteria	Rhizobium sp. AAP43	PF00691|PF13488	IPR006664|IPR006665|IPR039567
A0A0N1AEI8	Uncharacterized protein	389	1523424	Betaproteobacteria	beta proteobacterium AAP65	PF00691|PF01389	IPR000498|IPR006664|IPR006665
A0A0N1AFZ5	Peptidoglycan-associated protein	211	1523424	Betaproteobacteria	beta proteobacterium AAP65	PF00691	IPR006664|IPR006665|IPR014169
A0A0N1AHM7	Uncharacterized protein	195	1523424	Betaproteobacteria	beta proteobacterium AAP65	PF00691	IPR006664|IPR006665
A0A0N1AIH6	Uncharacterized protein	229	1523413	Alphaproteobacteria	Novosphingobium sp. AAP1	PF00691|PF13488	IPR006664|IPR006665|IPR039567
A0A0N1AKX3	Flagellar motor protein	278	1523413	Alphaproteobacteria	Novosphingobium sp. AAP1	PF00691|PF13677	IPR006665|IPR025713
A0A0N1B2F3	Uncharacterized protein	222	1523428	Betaproteobacteria	beta proteobacterium AAP99	PF00691	IPR006664|IPR006665
A0A0N1B5J5	Uncharacterized protein	129	1523428	Betaproteobacteria	beta proteobacterium AAP99	PF00691	IPR006664|IPR006665
A0A0N1B681	Uncharacterized protein	240	1523428	Betaproteobacteria	beta proteobacterium AAP99	PF00691|PF13488	IPR006664|IPR006665|IPR039567
A0A0N1B8D4	Peptidoglycan-associated protein	179	1523428	Betaproteobacteria	beta proteobacterium AAP99	PF00691	IPR006664|IPR006665|IPR014169
A0A0N1B9A1	Uncharacterized protein	439	1523432	Alphaproteobacteria	alpha proteobacterium AAP81b	PF00691|PF12849	IPR006665|IPR024370
A0A0N1BCN5	Uncharacterized protein	224	1523422	Alphaproteobacteria	Brevundimonas sp. AAP58	PF00691|PF13488	IPR006664|IPR006665|IPR039567
A0A0N1BDJ0	Peptidoglycan-associated protein	182	1523432	Alphaproteobacteria	alpha proteobacterium AAP81b	PF00691	IPR006664|IPR006665|IPR014169
A0A0N1BDR4	Flagellar motor protein MotB	325	1523416	Alphaproteobacteria	Blastomonas sp. AAP25	PF00691|PF13677	IPR006665|IPR025713
A0A0N1BEE3	Uncharacterized protein	426	1523432	Alphaproteobacteria	alpha proteobacterium AAP81b	PF00691|PF09850	IPR006665|IPR017732
A0A0N1BEP7	Uncharacterized protein	226	1523416	Alphaproteobacteria	Blastomonas sp. AAP25	PF00691|PF13488	IPR006664|IPR006665|IPR039567
A0A0N1BHK6	Cell envelope biogenesis protein OmpA	298	1523416	Alphaproteobacteria	Blastomonas sp. AAP25	PF00691	IPR006664|IPR006665
A0A0N1BRB8	Flagellar motor protein MotB	290	1523432	Alphaproteobacteria	alpha proteobacterium AAP81b	PF00691|PF13677	IPR006665|IPR025713
A0A0N1BXY3	Peptidoglycan-associated protein	179	1523427	Alphaproteobacteria	Novosphingobium sp. AAP93	PF00691	IPR006664|IPR006665|IPR014169
A0A0N1BYI8	Flagellar motor protein	279	1523427	Alphaproteobacteria	Novosphingobium sp. AAP93	PF00691|PF13677	IPR006665|IPR025713
A0A0N1C1D2	Uncharacterized protein	501	1523425	Alphaproteobacteria	Novosphingobium sp. AAP83	PF00691|PF09850	IPR006665|IPR017732
A0A0N1C3S9	Flagellar motor protein	279	1523425	Alphaproteobacteria	Novosphingobium sp. AAP83	PF00691|PF13677	IPR006665|IPR025713
A0A0N1C409	Cell envelope biogenesis protein OmpA	311	1523427	Alphaproteobacteria	Novosphingobium sp. AAP93	PF00691	IPR006664|IPR006665
A0A0N1C4H0	Peptidoglycan-associated protein	171	1523425	Alphaproteobacteria	Novosphingobium sp. AAP83	PF00691	IPR006664|IPR006665|IPR014169
A0A0N1C9W3	Uncharacterized protein	1965	1523425	Alphaproteobacteria	Novosphingobium sp. AAP83	PF00691|PF03797	IPR005546|IPR006664|IPR006665
A0A0N1JSN3	Putative lipoprotein YiaD	547	857265	Betaproteobacteria	Amantichitinum ursilacus	PF00691	IPR006664|IPR006665
A0A0N1JTX1	Motility protein B	333	857265	Betaproteobacteria	Amantichitinum ursilacus	PF00691|PF13677	IPR006665|IPR025713
A0A0N1L661	Peptidoglycan-associated protein	173	1523413	Alphaproteobacteria	Novosphingobium sp. AAP1	PF00691	IPR006664|IPR006665|IPR014169
A0A0N1LB81	Uncharacterized protein	279	1523428	Betaproteobacteria	beta proteobacterium AAP99	PF00691	IPR006664|IPR006665
A0A0N1LBE0	Uncharacterized protein	309	1523432	Alphaproteobacteria	alpha proteobacterium AAP81b	PF00691|PF16234	IPR006664|IPR006665
A0A0N1LDR2	Uncharacterized protein	170	1523428	Betaproteobacteria	beta proteobacterium AAP99	PF00691	IPR006664|IPR006665
A0A0N1LFE5	Uncharacterized protein	184	1523432	Alphaproteobacteria	alpha proteobacterium AAP81b	PF00691	IPR006664|IPR006665
A0A0N1LHS2	Flagellar motor protein MotB	134	1523427	Alphaproteobacteria	Novosphingobium sp. AAP93	PF00691	IPR006664|IPR006665
A0A0N1LKJ5	Chemotaxis protein MotB	301	1523422	Alphaproteobacteria	Brevundimonas sp. AAP58	PF00691|PF13677	IPR006665|IPR025713
A0A0N1LQ12	Uncharacterized protein	230	1523425	Alphaproteobacteria	Novosphingobium sp. AAP83	PF00691|PF13488	IPR006664|IPR006665|IPR039567
A0A0N7GXP0	Uncharacterized protein	158	1324350	Gammaproteobacteria	Acinetobacter equi	PF00691	IPR006664|IPR006665
A0A0N7GXQ4	Uncharacterized protein	354	1324350	Gammaproteobacteria	Acinetobacter equi	PF00691|PF13505	IPR006664|IPR006665|IPR027385
A0A0N7J8H4	Putative lipoprotein YiaD	216	1678128	Betaproteobacteria	Limnohabitans sp. 63ED37-2	PF00691|PF13441	IPR006664|IPR006665|IPR027367
A0A0N7J8N6	Peptidoglycan-associated protein	180	1678128	Betaproteobacteria	Limnohabitans sp. 63ED37-2	PF00691	IPR006664|IPR006665|IPR014169
A0A0N7J983	Outer membrane protein A	316	1678128	Betaproteobacteria	Limnohabitans sp. 63ED37-2	PF00691	IPR006664|IPR006665
A0A0N7KBG2	Peptidoglycan-associated lipoprotein	187	1303921	Gammaproteobacteria	endosymbiont of Bathymodiolus septemdierum str. My	PF00691	IPR006664|IPR006665
A0A0N7LUU3	Chemotaxis protein MotB	614	53501	Alphaproteobacteria	Thalassobius gelatinovorus	PF00691	IPR006665
A0A0N7LVT2	Outer membrane protein ArfA	659	53501	Alphaproteobacteria	Thalassobius gelatinovorus	PF00691|PF04972	IPR006664|IPR006665|IPR007055
A0A0N7LZ18	Outer membrane protein ArfA	340	928856	Alphaproteobacteria	Epibacterium multivorans	PF00691	IPR006664|IPR006665
A0A0N7M388	Inner membrane lipoprotein YiaD	219	1712645	Alphaproteobacteria	Phaeobacter sp. CECT 5382	PF00691|PF13488	IPR006664|IPR006665|IPR039567
A0A0N7M868	Inner membrane lipoprotein YiaD	545	1715692	Alphaproteobacteria	Ruegeria denitrificans	PF00691	IPR006665
[truncated: 10,512 more rows]
